# Supplementary material for: A Naturally Synonymous Mutation in SHOC2 Modulates ERK-PFK Cascade to Mediate Thermotolerance Divergence Among Oysters
Source: Research Square preprint supplement (doi:10.21203/rs.3.rs-7424750/v1), 2025-10-07
Supplement: Supplementary file 1 [file 1d1b94e283697cb4a888b686.xlsx]

## Sheet: Sheet1
Target gene	Primer sequences (5′-3′)
Flag-ERK	F:tccaagcttctgcaggaattcATGGCGAGCGGGGATAAA
	R:tctgtcgacgatatcgaattcTTATAAATCAGCAATTCCCATTTTCT
Myc-PFK	F:tccaagcttctgcaggaattcATGGCAATGCAAACGGGG
	R:tctgtcgacgatatcgaattcCTATATGTTGTCCTCGTCCTCAAAAT
Myc-PFKT775A	F:ATCTGTCCTTCgCCCCTGTCGAGGAACTCAAGA
	R:AGGGGcGAAGGACAGATGGCGTCTCTGCATTC
Myc-PFKT775D	F:TCTGTCCTTCgaCCCTGTCGAGGAACTCAAGAAA
	R:ACAGGGtcGAAGGACAGATGGCGTCTCTGCATT
Flag-ERK1/2T187D_Y189E	F:TTTGgacgagtttGTCGCAACAAGATGGTACAGAGC
	R:CGACaaactcgtcCAAAAATCCAGTGTGGTCATGATT
Flag-ERK1/2T187A_Y189F	F:TTTGgcagagtttGTCGCAACAAGATGGTACAGAGC
	R:CGACaaactctgcCAAAAATCCAGTGTGGTCATGATT
mCherry-SHOC2	F:agcccgggcggatccaagcttATGTCGCGTAGACCAAAACAAGG
	R:atcgaattcctgcagaagcttTATTGGACAAAAAGGACTCTGAATCC
pBiFC-VC155-ERK	F:accgagatctctcgaggtaccATGGCGAGCGGGGATAAA
	R:tttgcacgccggacgggtaccTAAATCAGCAATTCCCATTTTCTTC
pBiFC-VN173-PFK	F:ctgatatcggtaccagtcgacATGGCAATGCAAACGGGG
	R:gatggatcttctagagtcgacTATGTTGTCCTCGTCCTCAAAATC
BRAF_qRT-PCR	F:TTTAGTCGCAGCCGTTC
	R:TGATTTCCCAGTCCTCTCG
SHOC2_qRT-PCR	F:GCAAAGAAGAGGAAGCAAC
	R:AAATGTCAAACGTGAGCAA
SHOC2_HRM	F:AATTTGAATATGGAGCACAATCAGA
	R:CTAATGGCAAGAAAGTAAGCTGATTAT
SHOC_NGS_1-F	F:CACACTTATTTTCCAACTTTGGAAA
	R:CAGTCAGAACCCAGTGAACTGTAGTAC
SHOC_NGS_2-F	F:TAGATTATTTTTTTATTGTTATTTTAAAGGATG
	R:GAGCTACCTTAAACAAATATTTGCTCA
SHOC_NGS_3-F	F:ATGTATTATGAGTATTTTTATTTCCTTAGATTCC
	R:CAGAGATAACAGTAGGATAAAAGTACCTTAAA
SHOC_NGS_4-F	F:AGCCTCTCTGTTTTACAGGTATAACAGG
	R:TAATGCATTTGACACTGGACACATA
SHOC_NGS_5-F	F:TGAATCTGATTGTGAATGATTGAAAA
	R:TGAAGGTCTTCAGTATCTTACCTATTTCA
SHOC_NGS_6-F	F:ATCATTTTGTTGAATCTGATTACAGGC
	R:CATTTAGGGATGCGACTTGACC
Ef-1α	F: AGTCACCAAGGCTGCACAGAAAG
	R: TCCGACGTATTTCTTTGCGATGT
