# Supplementary material for: A Naturally Synonymous Mutation in SHOC2 Modulates ERK-PFK Cascade to Mediate Thermotolerance Divergence Among Oysters
Source: Research Square preprint supplement (doi:10.21203/rs.3.rs-7424750/v1), 2025-10-07
Supplement: Supplementary file 2 [file 1fbb5f641c67e227edd69f3c.xlsx]

## Sheet: PFK protein sequences
Phylum	Specie	Name	GenBank accession No.
			CDS	Protein
Porifera	Sycon ciliatum	ScPFK	XM_065334419.1	XP_065190491.1
	Amphimedon queenslandica	AqPFK	XM_003386199.3	XP_003386247.2
Cnidaria	Nematostella vectensis	NvPFK	XM_048734718.1	XP_048590675.1
	Pocillopora damicornis	PdPFK	XM_027203764.1	XP_027059565.1
	Pocillopora verrucosa	PvPFK	XM_059098438.2	XP_058954421.2
	Porites lutea	PlPFK	XM_073394725.1	XP_073250826.1
	Acropora muricata	AmPFK	XM_067191355.1	XP_067047456.1
	Montipora foliosa	MfPFK	XM_068850692.1	XP_068706793.1
Mollusca	Octopus sinensis	OsPFK	XM_029778597.2	XP_029634457.1
	Octopus bimaculoides	ObPFK	XM_014912119.2	XP_014767605.1
	Crassostrea gigas (GCA_011032805.1)	CgPFK	Genome BLAST	Genome BLAST
	Crassostrea angulata (GCA_020567875.1)	CaPFK	Genome BLAST	Genome BLAST
	Crassostrea virginica	CvPFK	XM_022468112.1	XP_022323820.1
	Saccostrea echinata	SePFK	XM_061325750.1	XP_061181734.1
	Ostrea edulis	OePFK	XM_056141417.1	XP_055997392.1
	Pecten maximus	PmPFK	XM_033870636.1	XP_033726527.1
	Argopecten irradians	AiPFK	XM_069250466.1	XP_069106567.1
	Mizuhopecten yessoensis	MyPFK	XM_021517390.1	XP_021373065.1
	Ylistrum balloti	YbPFK	XM_060210296.1	XP_060066279.1
	Mercenaria mercenaria	MmPFK	XM_053527163.1	XP_053383138.1
	Mytilus edulis	MePFK	XM_071286874.1	XP_071142975.1
	Mytilus trossulus	MtPFK	XM_063551739.1	XP_063407809.1
	Potamilus streckersoni	PsPFK	JAEAOA010001105.1	KAK3598231.1
	Haliotis asinine	HaPFK	XM_067809298.1	XP_067665399.1
	Biomphalaria glabrata	BgPFK	XM_056015113.1	XP_055871088.1
	Biomphalaria pfeifferi	BpPFK	JASAOG010000238.1	KAK0042546.1
	Gigantopelta aegis	GaPFK	XM_041505010.1	XP_041360944.1
	Liolophura japonica	LjPFK	XM_064740915.1	XP_064596985.1
Nematodes	Caenorhabditis elegans	CePFK	NM_171643.6	NP_741738.1
Arthropoda	Stegodyphus dumicola	SdPFK	XM_035355509.1	XP_035211400.1
	Drosophila melanogaster	DmPFK	NM_165746.3	NP_724890.1
	Bacillus rossius redtenbacheri	BrrPFK	XM_063363245.1	XP_063219315.1
	Periplaneta americana	PaPFK	XM_069848088.1	XP_069704189.1
Echinodermata	Amphiura filiformis	AfPFK	XM_072181936.1	XP_072038037.1
	Antedon mediterranea	AmePFK	XM_072098792.1	XP_071954893.1
	Lytechinus variegatus	LvPFK	XM_041623385.1	XP_041479319.1
	Lytechinus pictus	LpPFK	XM_054894966.2	XP_054750941.2
	Strongylocentrotus purpuratus	SpPFK	XM_030974361.1	XP_030830221.1
	Diadema setosum	DsPFK	XM_072319280.1	XP_072175381.1
	Diadema antillarum	DaPFK	XM_071626415.1	XP_071482516.1
	Apostichopus japonicus	AjPFK	XM_071955082.1	XP_071811183.1
	Holothuria leucospilota	HlPFK	JAIZAY010000022.1	KAJ8020389.1
Chordata	Homo sapiens	HmPFKP	NM_002627.5	NP_002618.1
	Homo sapiens	HmPFKM	XM_047428999.1	XP_047284955.1
	Mus musculus	MmPFKM	NM_001163487.1	NP_001156959.1
	Mus musculus	MmPFKP	NM_019703.4	NP_062677.1
