# Supplementary material for: A Naturally Synonymous Mutation in SHOC2 Modulates ERK-PFK Cascade to Mediate Thermotolerance Divergence Among Oysters
Source: Research Square preprint supplement (doi:10.21203/rs.3.rs-7424750/v1), 2025-10-07
Supplement: Supplementary file 3 [file 8bb4cffa4fec8c8ca922fdb1.xlsx]

## Sheet: Upregulated under heat stress
Protein accession	Protein description	Gene name	SW_0/SW_12 Ratio	SW_0/SW_12 P value	ERK_12/SW_12 Ratio	ERK_12/SW_12 P value	ERK_0/SW_0 Ratio	ERK_0/SW_0 P value	ERK_12/ERK_0 Ratio	ERK_12/ERK_0 P value	SW-12 vs SW-0 Regulation Type	MW [kDa]	Coverage [%]	Peptides	Unique peptides	Intensity SW_0_1	Intensity SW_0_2	Intensity SW_0_3	Intensity SW_12_1	Intensity SW_12_2	Intensity SW_12_3	Intensity ERK_0_1	Intensity ERK_0_2	Intensity ERK_0_3	Intensity ERK_12_1	Intensity ERK_12_2	Intensity ERK_12_3	SW_0_1	SW_0_2	SW_0_3	SW_12_1	SW_12_2	SW_12_3	ERK_0_1	ERK_0_2	ERK_0_3	ERK_12_1	ERK_12_2	ERK_12_3	Subcellular localization	KEGG KO No.	KEGG Gene	KEGG pathway	Biological Process	Cellular Component	Molecular Function	Pfam ID	Domain description	KOG category
CGIg20404	XP_011445753.2 uncharacterized protein LOC105341111 [Crassostrea gigas]	--	0.607924	0.04998	0.923597	0.71271	0.11709	0	12.9752	0	Up	60.8095	3.9	2	2	2356.6		2309.15	3861.34	4591.83	3059.17	273.155			2931.86		4156.64	0.5409		0.530008	0.886276	1.05394	0.702157	0.0626961			0.672937		0.954056	peroxisome	K11997	TRIM2_3; tripartite motif-containing protein 2/3							O
CGIg26681	XP_034327650.1 mucin-2 isoform X2 [Crassostrea gigas]	--	0.619608	0.0494415	1.07701	0.354744	1.42023	0.108628	1.22389	0.053	Up	67.7944	3.8	2	2	16990.8	14255.8	9202.34	22217.4	21959.9	21104.1	20426.6	18471.7	18548.6	25443.1	20531.4	24334.3	0.599393	0.502909	0.324636	0.783776	0.774692	0.7445	0.720599	0.651638	0.65435	0.897572	0.724298	0.858455	plasma membrane
CGIg20910	Q8NFT2 STEA2_HUMAN Metalloreductase STEAP2 OS=Homo sapiens OX=9606 GN=STEAP2 PE=1 SV=3	STEAP2	0.548124	0.0494148	0.974852	0.949115	1.63854	0.114558	1.08544	0.685805	Up	55.9739	4.2	2	2	5639.05	3680.6	4740.06	6011.18	10731.8	8907.59	5246.27	7371.8	10419.3	8323.63	10213.4	6468.47	0.393039	0.256535	0.330379	0.418976	0.748002	0.620854	0.365662	0.51381	0.726217	0.580153	0.71187	0.450849	plasma membrane	K14738	STEAP2; metalloreductase STEAP2 [EC:1.16.1.-]	map04978 Mineral absorption	GO:0000041 transition metal ion transport; GO:0006810 transport; GO:0006811 monoatomic ion transport; GO:0006812 monoatomic cation transport; GO:0006825 copper ion transport; GO:0006826 iron ion transport; GO:0006887 exocytosis; GO:0006892 post-Golgi vesicle-mediated transport; GO:0006893 Golgi to plasma membrane transport; GO:0006897 endocytosis; GO:0008152 metabolic process; GO:0009719 response…	GO:0000139 Golgi membrane; GO:0005622 intracellular anatomical structure; GO:0005737 cytoplasm; GO:0005768 endosome; GO:0005769 early endosome; GO:0005794 Golgi apparatus; GO:0005798 Golgi-associated vesicle; GO:0005829 cytosol; GO:0005886 plasma membrane; GO:0012505 endomembrane system; GO:0016020 membrane; GO:0030133 transport vesicle; GO:0030135 coated vesicle; GO:0030136 clathrin-coated vesic…	GO:0003824 catalytic activity; GO:0005215 transporter activity; GO:0008823 cupric reductase activity; GO:0016491 oxidoreductase activity; GO:0016722 oxidoreductase activity, acting on metal ions; GO:0016723 oxidoreductase activity, acting on metal ions, NAD or NADP as acceptor; GO:0052851 ferric-chelate reductase (NADPH) activity;
CGIg15558	P70684 PGDH_CAVPO 15-hydroxyprostaglandin dehydrogenase [NAD(+)] OS=Cavia porcellus OX=10141 GN=HPGD PE=2 SV=1	HPGD	0.662601	0.0492959	0.946987	0.679726	1.54198	0.0335138	0.926858	0.474283	Up	27.6858	17.4	4	4	8585.96	12401.3	11546.8	13486.4	16877.6	18736.5	19160.1	16469.2	14537.6	15344.7	14434.1	16718.9	0.689225	0.995498	0.926901	1.0826	1.35482	1.50405	1.53805	1.32204	1.16699	1.23177	1.15867	1.34208	cytoplasm	K00069	HPGD; 15-hydroxyprostaglandin dehydrogenase (NAD) [EC:1.1.1.141]		GO:0000003 reproduction; GO:0001523 retinoid metabolic process; GO:0001568 blood vessel development; GO:0001944 vasculature development; GO:0006066 alcohol metabolic process; GO:0006081 cellular aldehyde metabolic process; GO:0006082 organic acid metabolic process; GO:0006629 lipid metabolic process; GO:0006631 fatty acid metabolic process; GO:0006690 icosanoid metabolic process; GO:0006692 prost…	GO:0005576 extracellular region; GO:0005615 extracellular space; GO:0005622 intracellular anatomical structure; GO:0005634 nucleus; GO:0005654 nucleoplasm; GO:0005737 cytoplasm; GO:0005829 cytosol; GO:0005886 plasma membrane; GO:0016020 membrane; GO:0016323 basolateral plasma membrane; GO:0031974 membrane-enclosed lumen; GO:0031981 nuclear lumen; GO:0043226 organelle; GO:0043227 membrane-bounded …	GO:0000166 nucleotide binding; GO:0003824 catalytic activity; GO:0004745 NAD-retinol dehydrogenase activity; GO:0004888 transmembrane signaling receptor activity; GO:0004930 G protein-coupled receptor activity; GO:0004953 icosanoid receptor activity; GO:0004954 prostanoid receptor activity; GO:0004955 prostaglandin receptor activity; GO:0004957 prostaglandin E receptor activity; GO:0005488 bindin…	PF00106	PF00106 short chain dehydrogenase	IR
CGIg08129	Q9BZA8 PC11Y_HUMAN Protocadherin-11 Y-linked OS=Homo sapiens OX=9606 GN=PCDH11Y PE=1 SV=1	PCDH11Y	0.615438	0.048867	0.889737	0.401475	2.17476	0	0.66476	0	Up	127.985	0.9	1	1		3058.37	2639.7		5007.37	4251.19	6195.98			4449.13	4441.38	3466		0.585097	0.505002		0.957962	0.813296	1.18535			0.851164	0.849682	0.663082	plasma membrane	K16498	PCDHD1; protocadherin delta 1					PF08266; PF00028	PF08266 Cadherin-like; PF00028 Cadherin domain
CGIg08972	P02693 FABPI_RAT Fatty acid-binding protein, intestinal OS=Rattus norvegicus OX=10116 GN=Fabp2 PE=1 SV=4	Fabp2	0.413302	0.0488343	0.58303	0.190699	1.44315	0.257658	0.977489	0.701262	Up	15.3737	8	1	1	8220.29	23943.5	23614.8	45489.3	45233.5	44235.7	24175.2	28859.9	27461.9	9089.95	36988.5	32606.4	0.423963	1.23489	1.21794	2.34612	2.33293	2.28147	1.24684	1.48846	1.41635	0.468816	1.90769	1.68168	cytoplasm	K08752	FABP3; fatty acid-binding protein 3, muscle and heart	map03320 PPAR signaling pathway	GO:0003008 system process; GO:0006082 organic acid metabolic process; GO:0006629 lipid metabolic process; GO:0006631 fatty acid metabolic process; GO:0006638 neutral lipid metabolic process; GO:0006639 acylglycerol metabolic process; GO:0006641 triglyceride metabolic process; GO:0006810 transport; GO:0006811 monoatomic ion transport; GO:0006820 monoatomic anion transport; GO:0006869 lipid transpo…	GO:0005622 intracellular anatomical structure; GO:0005737 cytoplasm; GO:0005829 cytosol; GO:0005886 plasma membrane; GO:0005902 microvillus; GO:0005938 cell cortex; GO:0016020 membrane; GO:0042995 cell projection; GO:0045177 apical part of cell; GO:0045179 apical cortex; GO:0071944 cell periphery; GO:0098858 actin-based cell projection; GO:0099568 cytoplasmic region; GO:0099738 cell cortex region…	GO:0005215 transporter activity; GO:0005319 lipid transporter activity; GO:0005324 long-chain fatty acid transporter activity; GO:0005488 binding; GO:0005504 fatty acid binding; GO:0008289 lipid binding; GO:0031406 carboxylic acid binding; GO:0033293 monocarboxylic acid binding; GO:0036041 long-chain fatty acid binding; GO:0036094 small molecule binding; GO:0043167 ion binding; GO:0043168 anion b…	PF00061	PF00061 Lipocalin / cytosolic fatty-acid binding protein family	I
CGIg20272	XP_011427743.2 uncharacterized protein LOC105328523 [Crassostrea gigas]	--	0.338762	0.0484746	0.942678	0.461748	1.70106	0.249227	1.63587	0.0742748	Up	19.7118	12.3	2	2	2952.46	4643.8	1033.35	9050.76	7917.93	8505.26	3096.99	6096.77	5485.7	8821.1	8139.35	7053.28	0.453134	0.712714	0.158596	1.38908	1.21522	1.30536	0.475316	0.935712	0.841926	1.35383	1.2492	1.08251	extracellular
CGIg19192	XP_011429559.2 uncharacterized protein LOC105329813 isoform X1 [Crassostrea gigas]	--	0.568597	0.0469986	0.795892	0.0973349	1.28308	0.312136	1.09093	0.48906	Up	15.4858	12.5	1	1	655.734		926.993	1155.43	1567.4	1452.52	1278.28	897.214	870.659	1077.54	1211.32	1034.26	0.481988		0.681373	0.849282	1.15209	1.06765	0.939579	0.659484	0.639966	0.792032	0.890366	0.760217	mitochondria,peroxisome	K08515	VAMP7; vesicle-associated membrane protein 7	map04130 SNARE interactions in vesicular transport
CGIg20513	XP_011419162.2 uncharacterized protein LOC105322250 [Crassostrea gigas]	--	0.508577	0.0437303	1.22803	0.736743	1.25132	0.534449	1.92967	0.216606	Up	66.2309	3.5	2	2	1409.59	1901.77	1521.92	2610.81	2368.22	4524.5	2405.18	2475.02	1167.76	2013.94	6312.37	3344.29	0.509592	0.687523	0.550201	0.943856	0.856153	1.63569	0.869514	0.894765	0.422168	0.728074	2.28204	1.20902	cytoplasm	K11997	TRIM2_3; tripartite motif-containing protein 2/3					PF00643	PF00643 B-box zinc finger	O
CGIg25318	O19071 MGAT2_PIG Alpha-1,6-mannosyl-glycoprotein 2-beta-N-acetylglucosaminyltransferase OS=Sus scrofa OX=9823 GN=MGAT2 PE=3 SV=1	MGAT2	0.496038	0.0436852	0.922301	0.895297	1.12692	0.556747	1.64992	0.0679537	Up	53.5621	5.2	2	2	1242.34	1691.98	1435.7	3036.05	3882.26	1891.54	1621.65	1253.22	2049.8	2600.84		2816.05	0.556772	0.758285	0.643433	1.36065	1.73989	0.847723	0.726768	0.561649	0.91865	1.1656		1.26206	endoplasmic reticulum	K00736	MGAT2; alpha-1,6-mannosyl-glycoprotein beta-1,2-N-acetylglucosaminyltransferase [EC:2.4.1.143]	map00510 N-Glycan biosynthesis; map00513 Various types of N-glycan biosynthesis; map01100 Metabolic pathways	GO:0005975 carbohydrate metabolic process; GO:0006486 protein glycosylation; GO:0006487 protein N-linked glycosylation; GO:0006807 nitrogen compound metabolic process; GO:0008152 metabolic process; GO:0009058 biosynthetic process; GO:0009059 macromolecule biosynthetic process; GO:0009100 glycoprotein metabolic process; GO:0009101 glycoprotein biosynthetic process; GO:0009311 oligosaccharide metab…	GO:0000139 Golgi membrane; GO:0005622 intracellular anatomical structure; GO:0005737 cytoplasm; GO:0005794 Golgi apparatus; GO:0005795 Golgi stack; GO:0005797 Golgi medial cisterna; GO:0012505 endomembrane system; GO:0016020 membrane; GO:0031090 organelle membrane; GO:0031984 organelle subcompartment; GO:0031985 Golgi cisterna; GO:0043226 organelle; GO:0043227 membrane-bounded organelle; GO:00432…	GO:0003824 catalytic activity; GO:0005488 binding; GO:0008194 UDP-glycosyltransferase activity; GO:0008375 acetylglucosaminyltransferase activity; GO:0008455 alpha-1,6-mannosylglycoprotein 2-beta-N-acetylglucosaminyltransferase activity; GO:0016740 transferase activity; GO:0016757 glycosyltransferase activity; GO:0016758 hexosyltransferase activity; GO:0030246 carbohydrate binding; GO:0140096 cat…			G
CGIg12173	D3YXG0 HMCN1_MOUSE Hemicentin-1 OS=Mus musculus OX=10090 GN=Hmcn1 PE=1 SV=1	Hmcn1	0.644706	0.0403817	1.20589	0.168057	1.91453	0.553957	0.976974	0.851897	Up	119.264	1.9	2	2	2070.44	1514.12	1773.74	2529.04	3419.5	2362.68	1611.9	5227.16		3311.52	3159.29	3551.58	0.843531	0.616877	0.722652	1.03037	1.39316	0.962595	0.656717	2.12963		1.34917	1.28715	1.44697	extracellular	K08076	E3.4.24.21; astacin [EC:3.4.24.21]					PF01400; PF00090; PF00629	PF01400 Astacin (Peptidase family M12A); PF00090 Thrombospondin type 1 domain; PF00629 MAM domain, meprin/A5/mu	RP
CGIg17371	Q07837 SLC31_HUMAN Neutral and basic amino acid transport protein rBAT OS=Homo sapiens OX=9606 GN=SLC3A1 PE=1 SV=2	SLC3A1	0.439124	0.038841	1.52579	0.0326507	4.80152	0.00476204	0.72365	0.0576058	Up	77.0519	2.8	2	2	406.181	446.314	964.495	1343.95	1653.63	1140.18	2794.59	2500.84	3428.88	2214.2	2309.62	1789.53	0.186751	0.205204	0.44345	0.617912	0.760296	0.524226	1.28488	1.14982	1.57651	1.01803	1.0619	0.822778	cytoplasm	K14210	SLC3A1, RBAT; solute carrier family 3 (neutral and basic amino acid transporter), member 1	map04974 Protein digestion and absorption	GO:0003333 amino acid transmembrane transport; GO:0006810 transport; GO:0006811 monoatomic ion transport; GO:0006820 monoatomic anion transport; GO:0006865 amino acid transport; GO:0015711 organic anion transport; GO:0015849 organic acid transport; GO:0034220 monoatomic ion transmembrane transport; GO:0046942 carboxylic acid transport; GO:0051179 localization; GO:0051234 establishment of localiza…	GO:0005886 plasma membrane; GO:0016020 membrane; GO:0032991 protein-containing complex; GO:0071944 cell periphery; GO:0098796 membrane protein complex; GO:0098797 plasma membrane protein complex; GO:1990184 amino acid transport complex;		PF00128	PF00128 Alpha amylase, catalytic domain	G
CGIg09939	Q9D1Q1 MPH6_MOUSE M-phase phosphoprotein 6 OS=Mus musculus OX=10090 GN=Mphosph6 PE=1 SV=1	Mphosph6	0.192979	0.0386544	0.940167	0.672171	3.25098	0.00616021	1.49858	0.0677674	Up	20.3811	5.7	1	1	916.851		689.335	3982.41		4340.7	3109.1	2543.76	2179.68	3810.28	3128.26	4799.13	0.322833		0.242723	1.40225		1.52841	1.09475	0.895686	0.767488	1.34164	1.1015	1.68983	mitochondria	K12593	MPHOSPH6, MPP6; M-phase phosphoprotein 6, animal type	map03018 RNA degradation	GO:0000460 maturation of 5.8S rRNA; GO:0006139 nucleobase-containing compound metabolic process; GO:0006364 rRNA processing; GO:0006396 RNA processing; GO:0006725 cellular aromatic compound metabolic process; GO:0006807 nitrogen compound metabolic process; GO:0008152 metabolic process; GO:0009987 cellular process; GO:0010467 gene expression; GO:0016070 RNA metabolic process; GO:0016072 rRNA metab…	GO:0000176 nuclear exosome (RNase complex); GO:0000178 exosome (RNase complex); GO:0005622 intracellular anatomical structure; GO:0005634 nucleus; GO:0005730 nucleolus; GO:0031974 membrane-enclosed lumen; GO:0031981 nuclear lumen; GO:0032991 protein-containing complex; GO:0043226 organelle; GO:0043227 membrane-bounded organelle; GO:0043228 non-membrane-bounded organelle; GO:0043229 intracellular …				D
CGIg15219	XP_034325914.1 sacsin-like isoform X1 [Crassostrea gigas]	--	0.562337	0.0377471	0.799232	0.138892	0.954807	0.90369	1.48854	0.109816	Up	98.2284	1.3	1	1	449.371	796.943	836.366	1202.55	1226.49	1274.57	863.169	600.591	524.796	948.614	1226.55	784.884	0.55107	0.977302	1.02565	1.4747	1.50407	1.56302	1.05852	0.736513	0.643565	1.1633	1.50413	0.962514	cytoplasm				GO:0006457 protein folding; GO:0009987 cellular process; GO:0044087 regulation of cellular component biogenesis; GO:0048519 negative regulation of biological process; GO:0048523 negative regulation of cellular process; GO:0050789 regulation of biological process; GO:0050794 regulation of cellular process; GO:0051128 regulation of cellular component organization; GO:0051129 negative regulation of …	GO:0005622 intracellular anatomical structure; GO:0005634 nucleus; GO:0005737 cytoplasm; GO:0005739 mitochondrion; GO:0030424 axon; GO:0030425 dendrite; GO:0036477 somatodendritic compartment; GO:0042995 cell projection; GO:0043005 neuron projection; GO:0043226 organelle; GO:0043227 membrane-bounded organelle; GO:0043229 intracellular organelle; GO:0043231 intracellular membrane-bounded organelle…	GO:0005102 signaling receptor binding; GO:0005488 binding; GO:0005515 protein binding; GO:0030544 Hsp70 protein binding; GO:0031072 heat shock protein binding; GO:0044877 protein-containing complex binding; GO:0050750 low-density lipoprotein particle receptor binding; GO:0051087 protein-folding chaperone binding; GO:0070325 lipoprotein particle receptor binding; GO:0070628 proteasome binding;
CGIg13347	Q28DE6 RSBNL_XENTR Lysine-specific demethylase RSBN1L OS=Xenopus tropicalis OX=8364 GN=rsbn1l PE=2 SV=1	rsbn1l	0.330178	0.0373206	1.61086	0.267299	6.82158	0.0488995	0.715196	0.824914	Up	151.297	1.8	2	2	452.869	513.062	266.63	740.662	1946.53	1045.82	4058.6	3659.93	689.476	1335.89	1591.76	3085.72	0.170185	0.192805	0.100198	0.278336	0.731493	0.393013	1.52519	1.37538	0.2591	0.502017	0.598174	1.15959	nucleus	K22610	RSBN1, KDM9; lysine-specific demethylase 9 [EC:1.14.11.-]			GO:0000803 sex chromosome; GO:0000805 X chromosome; GO:0005622 intracellular anatomical structure; GO:0005634 nucleus; GO:0005694 chromosome; GO:0043226 organelle; GO:0043227 membrane-bounded organelle; GO:0043228 non-membrane-bounded organelle; GO:0043229 intracellular organelle; GO:0043231 intracellular membrane-bounded organelle; GO:0043232 intracellular non-membrane-bounded organelle;				S
CGIg17622	Q3B7H2 TAM41_DANRE Phosphatidate cytidylyltransferase, mitochondrial OS=Danio rerio OX=7955 GN=tamm41 PE=2 SV=1	tamm41	0.610484	0.0370615	0.620829	0.530475	1.16962	0.539294	0.86947	0.679543	Up	41.1885	2.5	1	1	4811.22	4276.93	3034.57	5859.71	6191.33	7806.52	3841.6		5611.01		1027.18	7191.58	0.586717	0.521562	0.370058	0.714578	0.755018	0.951986	0.468475		0.68425		0.125263	0.876997	mitochondria	K17807	TAM41, MMP37; mitochondrial translocator assembly and maintenance protein 41		GO:0006629 lipid metabolic process; GO:0006644 phospholipid metabolic process; GO:0006650 glycerophospholipid metabolic process; GO:0006655 phosphatidylglycerol biosynthetic process; GO:0006793 phosphorus metabolic process; GO:0006796 phosphate-containing compound metabolic process; GO:0008152 metabolic process; GO:0008610 lipid biosynthetic process; GO:0008654 phospholipid biosynthetic process; …	GO:0005622 intracellular anatomical structure; GO:0005737 cytoplasm; GO:0005739 mitochondrion; GO:0005740 mitochondrial envelope; GO:0005743 mitochondrial inner membrane; GO:0016020 membrane; GO:0019866 organelle inner membrane; GO:0019898 extrinsic component of membrane; GO:0031090 organelle membrane; GO:0031312 extrinsic component of organelle membrane; GO:0031314 extrinsic component of mitocho…	GO:0003824 catalytic activity; GO:0004605 phosphatidate cytidylyltransferase activity; GO:0016740 transferase activity; GO:0016772 transferase activity, transferring phosphorus-containing groups; GO:0016779 nucleotidyltransferase activity; GO:0070567 cytidylyltransferase activity;			S
CGIg04503	XP_034331709.1 small VCP/p97-interacting protein-like [Crassostrea gigas]	--	0.575301	0.0370518	0.931349	0.710789	1.8705	0.00700296	0.865483	0.456502	Up	8.89885	18.8	2	2	2932.22	2007.86	2058.47	3210.2	5045.61	3909.21	4529.2	4446.07	4115.55	3809.24	2299.07	5221.57	0.440431	0.30159	0.309191	0.482185	0.757871	0.58718	0.680305	0.667818	0.618172	0.572163	0.34533	0.784302	cytoplasm,nucleus	K14014	SVIP; small VCP/p97-interacting protein	map04141 Protein processing in endoplasmic reticulum	GO:0009889 regulation of biosynthetic process; GO:0009891 positive regulation of biosynthetic process; GO:0009892 negative regulation of metabolic process; GO:0009893 positive regulation of metabolic process; GO:0009894 regulation of catabolic process; GO:0009895 negative regulation of catabolic process; GO:0009896 positive regulation of catabolic process; GO:0010506 regulation of autophagy; GO:0…	GO:0005622 intracellular anatomical structure; GO:0005737 cytoplasm; GO:0005783 endoplasmic reticulum; GO:0005789 endoplasmic reticulum membrane; GO:0012505 endomembrane system; GO:0016020 membrane; GO:0031984 organelle subcompartment; GO:0042175 nuclear outer membrane-endoplasmic reticulum membrane network; GO:0043226 organelle; GO:0043227 membrane-bounded organelle; GO:0043229 intracellular org…	GO:0005488 binding; GO:0005515 protein binding; GO:0019899 enzyme binding; GO:0043621 protein self-association; GO:0051117 ATPase binding;
CGIg19972	XP_011443914.3 leucine-rich repeat-containing protein 20 isoform X1 [Crassostrea gigas]	--	0.528004	0.0369948	0.8003	0.50077	0.390211	0	3.88433	0	Up	18.9609	5.8	1	1		985.587	846.53		1573.25	1896.65	357.456			2257.03	737.751	1170.66		0.530261	0.455445		0.84643	1.02042	0.192317			1.21431	0.396921	0.629831	cytoplasm				GO:0003008 system process; GO:0003012 muscle system process; GO:0032501 multicellular organismal process;					R
CGIg21862	XP_011446716.2 uncharacterized protein LOC105341732 isoform X1 [Crassostrea gigas]	--	0.649346	0.0368212	1.05377	0.69396	1.34559	0.164011	1.20603	0.301344	Up	40.1847	2.8	1	1	2721.26	2888.23	2746.57	4678.74	4953.27	3236.41	3757.65	2741.16	4744.99	5184.7	4253.72	4121.9	0.711698	0.755364	0.718316	1.22364	1.29544	0.846425	0.982747	0.716901	1.24097	1.35597	1.11249	1.07801	extracellular
CGIg22527	Q9I8C7 ACH10_CHICK Neuronal acetylcholine receptor subunit alpha-10 OS=Gallus gallus OX=9031 GN=CHRNA10 PE=3 SV=1	CHRNA10	0.460132	0.0361378	1.29351	0.0402265	1.5837	0.115688	1.77506	0.000510818	Up	26.3633	11.8	3	3	2669.4	6389.42	5004.15	10833.5	8836.31	10893.1	7356.12	7223.47	7692	12793	12197.1	14543.2	0.315446	0.755045	0.591346	1.28021	1.0442	1.28725	0.86928	0.853605	0.908973	1.51176	1.44135	1.71859	extracellular	K04811	CHRNA10; nicotinic acetylcholine receptor alpha-10	map04080 Neuroactive ligand-receptor interaction						T
CGIg13977	Q9BXJ4 C1QT3_HUMAN Complement C1q tumor necrosis factor-related protein 3 OS=Homo sapiens OX=9606 GN=C1QTNF3 PE=1 SV=1	C1QTNF3	0.538975	0.0350581	0.522116	0	0.76204	0.405471	1.27122	0	Up	22.727	5	1	1	31407.3	34737.9	17797.4	53694.2	49249.4	52801.5	13743.1	25939.1	24285.4		27105.7		0.904777	1.00073	0.512705	1.54681	1.41877	1.5211	0.39591	0.747251	0.699609		0.780856		plasma membrane	K23284	C1QL; C1q-related factor		GO:0001817 regulation of cytokine production; GO:0001818 negative regulation of cytokine production; GO:0001819 positive regulation of cytokine production; GO:0001932 regulation of protein phosphorylation; GO:0001934 positive regulation of protein phosphorylation; GO:0002791 regulation of peptide secretion; GO:0002792 negative regulation of peptide secretion; GO:0002793 positive regulation of pep…	GO:0005576 extracellular region; GO:0005615 extracellular space;	GO:0005488 binding; GO:0005515 protein binding; GO:0042802 identical protein binding;	PF00386	PF00386 C1q domain
CGIg19153	Q9BYK8 HELZ2_HUMAN Helicase with zinc finger domain 2 OS=Homo sapiens OX=9606 GN=HELZ2 PE=1 SV=6	HELZ2	0.607709	0.0344004	0.891756	0.230356	0.531192	0.0849747	2.76247	0.0140189	Up	298.102	0.4	1	1	1251.07	882.977	1499.15	2199.08	1830.11	1949.31	390.392	928.015	611.518	1914.41	1847.82	1569.14	0.77791	0.549032	0.932164	1.36738	1.13796	1.21208	0.242744	0.577036	0.38024	1.19037	1.14897	0.975685	nucleus	K25165	HELZ2; helicase with zinc finger domain 2 [EC:3.6.4.-]		GO:0006355 regulation of DNA-templated transcription; GO:0006357 regulation of transcription by RNA polymerase II; GO:0009889 regulation of biosynthetic process; GO:0009891 positive regulation of biosynthetic process; GO:0009893 positive regulation of metabolic process; GO:0010468 regulation of gene expression; GO:0010556 regulation of macromolecule biosynthetic process; GO:0010557 positive regul…	GO:0005622 intracellular anatomical structure; GO:0005634 nucleus; GO:0005654 nucleoplasm; GO:0031974 membrane-enclosed lumen; GO:0031981 nuclear lumen; GO:0043226 organelle; GO:0043227 membrane-bounded organelle; GO:0043229 intracellular organelle; GO:0043231 intracellular membrane-bounded organelle; GO:0043233 organelle lumen; GO:0070013 intracellular organelle lumen;	GO:0003712 transcription coregulator activity; GO:0003713 transcription coactivator activity; GO:0030374 nuclear receptor coactivator activity; GO:0140110 transcription regulator activity;	PF18738; PF07679; PF00773; PF13086; PF13087	PF18738 DZIP3/ hRUL138-like HEPN; PF07679 Immunoglobulin I-set domain; PF00773 RNB domain; PF13086 AAA domain; PF13087 AAA domain	J
CGIg17184	D8VNT0 FCNV4_CERRY Ryncolin-4 OS=Cerberus rynchops OX=46267 PE=1 SV=1	--	0.202676	0.0341748	0.170044	0.07599	1.32099	0.516376	0.635127	0.247689	Up	29.4814	3.5	1	1	7913.53	1057.46	4381.03	22577.8	22037.3	21263.5	6367.31	5391.24		2925.86		4542.31	1.01152	0.135166	0.559989	2.88592	2.81683	2.71793	0.813878	0.689115		0.373988		0.580604	cytoplasm	K10104	FCN; ficolin			GO:0016020 membrane;	GO:0005488 binding; GO:0008061 chitin binding; GO:0097367 carbohydrate derivative binding;	PF00147	PF00147 Fibrinogen beta and gamma chains, C-terminal globular domain	R
CGIg19882	Q6DF94 SPICE_XENLA Spindle and centriole-associated protein 1 OS=Xenopus laevis OX=8355 GN=spice1 PE=2 SV=1	spice1	0.567154	0.033615	1.08295	0.261051	1.69701	0.0458978	1.12518	0.200319	Up	87.6852	5.2	4	4	7510.68	4716.26	8567.16	11062.5	12780.2	12821.3	10427.4	13264.7	11595.7	12253.2	13723.4	13728.6	0.596647	0.374658	0.680574	0.878801	1.01525	1.01852	0.828352	1.05375	0.921156	0.973393	1.09018	1.0906	nucleus	K16490	SPICE1; spindle and centriole-associated protein 1		GO:0000226 microtubule cytoskeleton organization; GO:0000278 mitotic cell cycle; GO:0000280 nuclear division; GO:0006996 organelle organization; GO:0007010 cytoskeleton organization; GO:0007017 microtubule-based process; GO:0007049 cell cycle; GO:0007051 spindle organization; GO:0007052 mitotic spindle organization; GO:0007059 chromosome segregation; GO:0009987 cellular process; GO:0010564 regula…	GO:0005622 intracellular anatomical structure; GO:0005737 cytoplasm; GO:0005813 centrosome; GO:0005814 centriole; GO:0005815 microtubule organizing center; GO:0005819 spindle; GO:0005856 cytoskeleton; GO:0015630 microtubule cytoskeleton; GO:0043226 organelle; GO:0043228 non-membrane-bounded organelle; GO:0043229 intracellular organelle; GO:0043232 intracellular non-membrane-bounded organelle;
CGIg06574	Q8K0U4 HS12A_MOUSE Heat shock 70 kDa protein 12A OS=Mus musculus OX=10090 GN=Hspa12a PE=1 SV=1	Hspa12a	0.51083	0.0335972	0.842982	0.393223	2.34875	0.0157229	0.702595	0.144996	Up	54.3988	8.8	5	4	2558.7	1324.18	1306.47	3170.07	3713.17	3275.43	4109.19	4275.21	3804.07	3366.77	3419.48	1777.32	0.579286	0.299793	0.295784	0.7177	0.840656	0.741553	0.930317	0.967903	0.861237	0.762233	0.774166	0.402384	cytoplasm									O
CGIg12735	XP_034308095.1 tripartite motif-containing protein 72-like [Crassostrea gigas]	--	0.625804	0.0320027	0.868069	0.271558	1.41831	0.112588	0.978009	0.923268	Up	63.1266	1.6	1	1	1411.13	2096.27	2001.15	3404.73	2769.42	2628.19	2024.48	2955.79	2832.58	2443.33	2937.56	2260.15	0.500879	0.74407	0.71031	1.20851	0.983008	0.932876	0.718591	1.04916	1.00542	0.867259	1.04269	0.80224	nucleus	K11997	TRIM2_3; tripartite motif-containing protein 2/3					PF00643	PF00643 B-box zinc finger	O
CGIg27986	Q98TB4 GDF8_OREMO Growth/differentiation factor 8 OS=Oreochromis mossambicus OX=8127 GN=gdf-8 PE=2 SV=1	gdf-8	0.411891	0.0305452	0.510522	0	1.73512	0.0205232	0.714335	0	Up	49.2405	2.6	1	1	1098.88	1067.64	751.951	1852.7	2871		1470.17	1977.15	1616.6			1205.78	0.769308	0.747443	0.52643	1.29705	2.00995		1.02924	1.38417	1.13176			0.844147	mitochondria	K05497	MSTN, GDF8; growth differentiation factor 8	map04060 Cytokine-cytokine receptor interaction	GO:0002119 nematode larval development; GO:0002164 larval development; GO:0002237 response to molecule of bacterial origin; GO:0006355 regulation of DNA-templated transcription; GO:0006357 regulation of transcription by RNA polymerase II; GO:0006950 response to stress; GO:0006952 defense response; GO:0007154 cell communication; GO:0007165 signal transduction; GO:0007166 cell surface receptor sign…	GO:0005576 extracellular region; GO:0005615 extracellular space;	GO:0005102 signaling receptor binding; GO:0005126 cytokine receptor binding; GO:0005160 transforming growth factor beta receptor binding; GO:0005488 binding; GO:0005515 protein binding;	PF00019	PF00019 Transforming growth factor beta like domain	T
CGIg24317	XP_011438639.2 uncharacterized protein LOC105336154 isoform X1 [Crassostrea gigas]	--	0.437829	0.0292461	0	0	2.55464	0.017048	0	0	Up	41.6362	2.7	1	1	4243.39	5392.29	2309.13	7990.34	8832.68	10458.8	10513.2	10243.7	9757.73				0.522252	0.663652	0.284195	0.983406	1.08708	1.28721	1.29391	1.26074	1.20093				extracellular	K23284	C1QL; C1q-related factor					PF00386	PF00386 C1q domain
CGIg11457	P63056 NOE3_MOUSE Noelin-3 OS=Mus musculus OX=10090 GN=Olfm3 PE=1 SV=1	Olfm3	0.666204	0.0290059	0.842119	0.130059	1.47749	0.0291713	0.855541	0.136808	Up	55.5107	4.5	2	2	3332.07	2235.81	2925.18	4202.34	4593.28	3952.82	4079.28	4430.79	4038.36	3964.29	3743.49	3027.92	0.808261	0.542341	0.709563	1.01936	1.11419	0.958837	0.989514	1.07478	0.979586	0.96162	0.90806	0.734485	endoplasmic reticulum	K25446	OLFM3; noelin-3		GO:0001654 eye development; GO:0001754 eye photoreceptor cell differentiation; GO:0007275 multicellular organism development; GO:0007399 nervous system development; GO:0007423 sensory organ development; GO:0009653 anatomical structure morphogenesis; GO:0009887 animal organ morphogenesis; GO:0009987 cellular process; GO:0022008 neurogenesis; GO:0030154 cell differentiation; GO:0030182 neuron diffe…	GO:0005576 extracellular region; GO:0005615 extracellular space; GO:0005622 intracellular anatomical structure; GO:0005737 cytoplasm; GO:0005794 Golgi apparatus; GO:0005886 plasma membrane; GO:0008328 ionotropic glutamate receptor complex; GO:0012505 endomembrane system; GO:0016020 membrane; GO:0032281 AMPA glutamate receptor complex; GO:0032991 protein-containing complex; GO:0034702 monoatomic i…				W
CGIg07844	P55214 CASP7_MESAU Caspase-7 OS=Mesocricetus auratus OX=10036 GN=CASP7 PE=1 SV=1	CASP7	0.656212	0.0288659	0.966214	0.753136	1.07044	0.583123	1.37552	0.124571	Up	28.9516	5.5	1	1	1924.11	1960	1377.93	2644.94	2412.98	2960.9	1892.78	2062.62	1677.28	2234.06	3363.83	2150	0.826945	0.842369	0.592205	1.13674	1.03705	1.27253	0.81348	0.886472	0.720859	0.960153	1.44571	0.924026	extracellular	K04397	CASP7; caspase 7 [EC:3.4.22.60]	map04210 Apoptosis; map04214 Apoptosis - fly; map04215 Apoptosis - multiple species; map04668 TNF signaling pathway	GO:0000003 reproduction; GO:0002165 instar larval or pupal development; GO:0003006 developmental process involved in reproduction; GO:0006355 regulation of DNA-templated transcription; GO:0006357 regulation of transcription by RNA polymerase II; GO:0006508 proteolysis; GO:0006807 nitrogen compound metabolic process; GO:0006810 transport; GO:0006915 apoptotic process; GO:0006950 response to stress…	GO:0005622 intracellular anatomical structure; GO:0005634 nucleus; GO:0005654 nucleoplasm; GO:0005737 cytoplasm; GO:0005739 mitochondrion; GO:0005829 cytosol; GO:0031974 membrane-enclosed lumen; GO:0031981 nuclear lumen; GO:0043226 organelle; GO:0043227 membrane-bounded organelle; GO:0043229 intracellular organelle; GO:0043231 intracellular membrane-bounded organelle; GO:0043233 organelle lumen; …	GO:0003824 catalytic activity; GO:0004175 endopeptidase activity; GO:0004190 aspartic-type endopeptidase activity; GO:0004197 cysteine-type endopeptidase activity; GO:0005488 binding; GO:0005515 protein binding; GO:0008233 peptidase activity; GO:0008234 cysteine-type peptidase activity; GO:0016787 hydrolase activity; GO:0019904 protein domain specific binding; GO:0070001 aspartic-type peptidase a…	PF00656	PF00656 Caspase domain	D
CGIg18695	Q9D9B4 LRMDA_MOUSE Leucine-rich melanocyte differentiation-associated protein OS=Mus musculus OX=10090 GN=Lrmda PE=1 SV=1	Lrmda	0.583939	0.0286825	0.869798	0.00930828	1.52039	0.0567217	0.979704	0.461402	Up	28.2847	7.3	2	2	10289.9	12847.1	18338.1	24541.5	23151.9	23333.1	21388.7	21050.7	20619.2	20027.5	20186.3	21565	0.461423	0.576093	0.82232	1.10049	1.03818	1.04631	0.959115	0.943961	0.92461	0.898078	0.905196	0.967021	cytoplasm	K24399	LRMDA; leucine-rich melanocyte differentiation-associated protein		GO:0009987 cellular process; GO:0030154 cell differentiation; GO:0030318 melanocyte differentiation; GO:0032502 developmental process; GO:0043473 pigmentation; GO:0048066 developmental pigmentation; GO:0048869 cellular developmental process; GO:0050931 pigment cell differentiation;					A
CGIg10143	P97329 KI20A_MOUSE Kinesin-like protein KIF20A OS=Mus musculus OX=10090 GN=Kif20a PE=1 SV=1	Kif20a	0.484306	0.028549	1.26101	0.294337	1.82753	0.0859707	1.42474	0.198956	Up	264.963	1	2	2	1146.59	2388.11	1413.22	2953.27	3511.57	3751.68	3944.98	2207.45	2890.07	3159.4	4220.78	5503	0.361567	0.753072	0.445648	0.931288	1.10734	1.18306	1.24402	0.696101	0.91136	0.99629	1.33099	1.73532	nucleus	K10402	KIF20; kinesin family member 20		GO:0000003 reproduction; GO:0000212 meiotic spindle organization; GO:0000226 microtubule cytoskeleton organization; GO:0000278 mitotic cell cycle; GO:0000280 nuclear division; GO:0006996 organelle organization; GO:0007010 cytoskeleton organization; GO:0007017 microtubule-based process; GO:0007018 microtubule-based movement; GO:0007049 cell cycle; GO:0007051 spindle organization; GO:0007052 mitoti…	GO:0000922 spindle pole; GO:0005622 intracellular anatomical structure; GO:0005819 spindle; GO:0005856 cytoskeleton; GO:0005871 kinesin complex; GO:0005874 microtubule; GO:0005875 microtubule associated complex; GO:0005876 spindle microtubule; GO:0015630 microtubule cytoskeleton; GO:0032991 protein-containing complex; GO:0043226 organelle; GO:0043228 non-membrane-bounded organelle; GO:0043229 int…	GO:0003774 cytoskeletal motor activity; GO:0003777 microtubule motor activity; GO:0003824 catalytic activity; GO:0016462 pyrophosphatase activity; GO:0016787 hydrolase activity; GO:0016817 hydrolase activity, acting on acid anhydrides; GO:0016818 hydrolase activity, acting on acid anhydrides, in phosphorus-containing anhydrides; GO:0016887 ATP hydrolysis activity; GO:0017111 ribonucleoside tripho…	PF00225	PF00225 Kinesin motor domain	Z
CGIg14540	XP_011447615.2 uncharacterized protein LOC105342384 [Crassostrea gigas]	--	0.524126	0.028429	1.9086	0.000239168	2.22025	0.0157449	1.64013	0.00146325	Up	18.5654	17.8	3	3	8737.94	9065.48	4899.16	14801.1	15161.2	13352.8	18260.3	16963.4	15181.6	27011.8	29420.3	26239.2	0.356045	0.369391	0.199626	0.603102	0.617772	0.544086	0.744053	0.691206	0.618606	1.10065	1.19879	1.06917	extracellular
CGIg14676	P42325 NCAH_DROME Neurocalcin homolog OS=Drosophila melanogaster OX=7227 GN=Nca PE=1 SV=2	Nca	0.429136	0.028314	0.61541	0.0678363	1.0017	0.974556	1.43164	0.113874	Up	21.6856	5.4	2	2	8340.2	11036.7	5725.33	13693.3	20728.6	24072.9	5935.88	10664	8545	10154.4	13029.4	12814.6	0.431286	0.570727	0.296066	0.708106	1.07191	1.24485	0.306954	0.551452	0.441876	0.525103	0.67377	0.662662	mitochondria	K23847	HPCAL1; hippocalcin-like protein 1		GO:0001101 response to acid chemical; GO:0001558 regulation of cell growth; GO:0001654 eye development; GO:0003008 system process; GO:0003013 circulatory system process; GO:0003073 regulation of systemic arterial blood pressure; GO:0006140 regulation of nucleotide metabolic process; GO:0006810 transport; GO:0006811 monoatomic ion transport; GO:0007154 cell communication; GO:0007165 signal transdu…	GO:0005622 intracellular anatomical structure; GO:0005737 cytoplasm; GO:0005794 Golgi apparatus; GO:0005798 Golgi-associated vesicle; GO:0005829 cytosol; GO:0005886 plasma membrane; GO:0012505 endomembrane system; GO:0012506 vesicle membrane; GO:0012510 trans-Golgi network transport vesicle membrane; GO:0016020 membrane; GO:0019898 extrinsic component of membrane; GO:0030117 membrane coat; GO:003…	GO:0003779 actin binding; GO:0005215 transporter activity; GO:0005216 monoatomic ion channel activity; GO:0005488 binding; GO:0005509 calcium ion binding; GO:0005515 protein binding; GO:0008092 cytoskeletal protein binding; GO:0015075 monoatomic ion transmembrane transporter activity; GO:0015267 channel activity; GO:0015276 ligand-gated monoatomic ion channel activity; GO:0015318 inorganic molecu…	PF13833; PF13499	PF13833 EF-hand domain pair; PF13499 EF-hand domain pair	T
CGIg16089	XP_019923889.2 dynactin subunit 3 isoform X1 [Crassostrea gigas]	--	0.304885	0.0274427	0.435547	0.00750205	1.7612	0.150707	0.811131	0.25424	Up	22.4444	19.8	3	3	11654.4	11998.6	3702.36	29547.2	29411	30765.2	15073.4	15671.3	17433.4	9008.12	14697.5	15373.1	0.388081	0.399541	0.123285	0.983895	0.979358	1.02445	0.501931	0.52184	0.580515	0.299962	0.489413	0.51191	cytoplasm	K10425	DCTN3; dynactin 3		GO:0000086 G2/M transition of mitotic cell cycle; GO:0000278 mitotic cell cycle; GO:0000910 cytokinesis; GO:0002376 immune system process; GO:0002478 antigen processing and presentation of exogenous peptide antigen; GO:0002495 antigen processing and presentation of peptide antigen via MHC class II; GO:0002504 antigen processing and presentation of peptide or polysaccharide antigen via MHC class I…	GO:0005622 intracellular anatomical structure; GO:0005634 nucleus; GO:0005730 nucleolus; GO:0005737 cytoplasm; GO:0005813 centrosome; GO:0005815 microtubule organizing center; GO:0005829 cytosol; GO:0005856 cytoskeleton; GO:0005869 dynactin complex; GO:0005875 microtubule associated complex; GO:0015629 actin cytoskeleton; GO:0015630 microtubule cytoskeleton; GO:0031974 membrane-enclosed lumen; GO…	GO:0005198 structural molecule activity;
CGIg22116	Q40302 CALM_MACPY Calmodulin OS=Macrocystis pyrifera OX=35122 PE=2 SV=3	--	0.57298	0.0258908	1.23501	0.0589059	1.66826	0.0448125	1.29201	0.0772886	Up	23.4769	11.3	2	2	2913.67	4675.19	4907.77	7013.75	7142.21	7653.89	5932.82	7757	7157.76	9742.43	9488.34	7704.62	0.361008	0.579263	0.608079	0.869014	0.884931	0.948329	0.735085	0.961104	0.886857	1.2071	1.17562	0.954613	nucleus	K02183	CALM; calmodulin	map04014 Ras signaling pathway; map04015 Rap1 signaling pathway; map04020 Calcium signaling pathway; map04022 cGMP-PKG signaling pathway; map04024 cAMP signaling pathway; map04070 Phosphatidylinositol signaling system; map04114 Oocyte meiosis; map04218 Cellular senescence; map04261 Adrenergic signaling in cardiomyocytes; map04270 Vascular smooth muscle contraction; map04371 Apelin signaling pathw…	GO:0000003 reproduction; GO:0000226 microtubule cytoskeleton organization; GO:0000741 karyogamy; GO:0000742 karyogamy involved in conjugation with cellular fusion; GO:0000747 conjugation with cellular fusion; GO:0006606 protein import into nucleus; GO:0006607 NLS-bearing protein import into nucleus; GO:0006629 lipid metabolic process; GO:0006644 phospholipid metabolic process; GO:0006650 glycerop…	GO:0000131 incipient cellular bud site; GO:0001411 hyphal tip; GO:0005622 intracellular anatomical structure; GO:0005737 cytoplasm; GO:0005815 microtubule organizing center; GO:0005816 spindle pole body; GO:0005823 central plaque of spindle pole body; GO:0005856 cytoskeleton; GO:0005933 cellular bud; GO:0005934 cellular bud tip; GO:0005935 cellular bud neck; GO:0005937 mating projection; GO:00156…	GO:0005488 binding; GO:0005509 calcium ion binding; GO:0005515 protein binding; GO:0019899 enzyme binding; GO:0019900 kinase binding; GO:0019901 protein kinase binding; GO:0043167 ion binding; GO:0043169 cation binding; GO:0046872 metal ion binding; GO:0048306 calcium-dependent protein binding; GO:0051019 mitogen-activated protein kinase binding;	PF13499	PF13499 EF-hand domain pair	T
CGIg05970	G5EBX9 PPE_CAEEL Serine/threonine-protein phosphatase with EF-hands pef-1 OS=Caenorhabditis elegans OX=6239 GN=pef-1 PE=1 SV=1	pef-1	0.614341	0.0253404	0.893232	0.557905	1.36455	0.346678	1.06553	0.988768	Up	79.1394	1.6	1	1	621.606	787.179	889.767	1184.07	1477.82	1079.6		1336.45	754.544	1845.27	753.527	743.219	0.490363	0.620978	0.701907	0.934072	1.1658	0.851661		1.05428	0.595234	1.45567	0.594431	0.5863	cytoplasm	K13807	PPEF, PPP7C; serine/threonine-protein phosphatase with EF-hands [EC:3.1.3.16]	map04745 Phototransduction - fly	GO:0001932 regulation of protein phosphorylation; GO:0001933 negative regulation of protein phosphorylation; GO:0006470 protein dephosphorylation; GO:0006793 phosphorus metabolic process; GO:0006796 phosphate-containing compound metabolic process; GO:0006807 nitrogen compound metabolic process; GO:0007154 cell communication; GO:0007165 signal transduction; GO:0007602 phototransduction; GO:0008152…	GO:0001750 photoreceptor outer segment; GO:0001917 photoreceptor inner segment; GO:0005622 intracellular anatomical structure; GO:0005634 nucleus; GO:0005737 cytoplasm; GO:0005929 cilium; GO:0036477 somatodendritic compartment; GO:0042995 cell projection; GO:0043005 neuron projection; GO:0043025 neuronal cell body; GO:0043226 organelle; GO:0043227 membrane-bounded organelle; GO:0043229 intracellu…	GO:0003824 catalytic activity; GO:0004721 phosphoprotein phosphatase activity; GO:0004722 protein serine/threonine phosphatase activity; GO:0004723 calcium-dependent protein serine/threonine phosphatase activity; GO:0005488 binding; GO:0005515 protein binding; GO:0005516 calmodulin binding; GO:0016787 hydrolase activity; GO:0016788 hydrolase activity, acting on ester bonds; GO:0016791 phosphatase…	PF00149; PF13499	PF00149 Calcineurin-like phosphoesterase; PF13499 EF-hand domain pair	T
CGIg08790	P42839 VNX1_YEAST Low affinity vacuolar monovalent cation/H(+) antiporter OS=Saccharomyces cerevisiae (strain ATCC 204508 / S288c) OX=559292 GN=VNX1 PE=1 SV=1	VNX1	0.589508	0.0237641	1.01423	0.865051	0	0	0	0	Up	87.2924	1.7	1	1	408.53		331.001	625.089	547.669	708.976				463.295	462.234	982.978	0.753368		0.610397	1.15272	1.00995	1.30742				0.85436	0.852402	1.8127	plasma membrane	K07300	chaA, CAX; Ca2+:H+ antiporter					PF03733	PF03733 Inner membrane component domain	P
CGIg16622	Q40302 CALM_MACPY Calmodulin OS=Macrocystis pyrifera OX=35122 PE=2 SV=3	--	0.305912	0.0226556	0.723807	0.0423769	3.29469	0.0229815	0.718144	0.0515904	Up	23.2143	10	2	2	6301.08	1932.5	2399.24	12419	10485.2	11853.6	12654.4	10115	12262.5	7738.66	10121.1	7298.14	0.617606	0.189416	0.235164	1.21726	1.02772	1.16184	1.24033	0.991429	1.20192	0.758512	0.992032	0.715334	cytoplasm	K02183	CALM; calmodulin	map04014 Ras signaling pathway; map04015 Rap1 signaling pathway; map04020 Calcium signaling pathway; map04022 cGMP-PKG signaling pathway; map04024 cAMP signaling pathway; map04070 Phosphatidylinositol signaling system; map04114 Oocyte meiosis; map04218 Cellular senescence; map04261 Adrenergic signaling in cardiomyocytes; map04270 Vascular smooth muscle contraction; map04371 Apelin signaling pathw…				PF13499; PF13833	PF13499 EF-hand domain pair; PF13833 EF-hand domain pair	T
CGIg03599	XP_011420033.2 uncharacterized protein LOC105322828 [Crassostrea gigas]	--	0.660402	0.0221611	1.01174	0.836329	1.24454	0.171797	1.23098	0.0934629	Up	26.5045	9	2	2	11006.8	14786.6	13205.8	21773.1	20385.2	16895.5	16047.8	13517.5	18970.6	20502.7	19784.1	19460.1	0.777569	1.04459	0.932917	1.53815	1.4401	1.19357	1.13369	0.954938	1.34017	1.4484	1.39764	1.37474	extracellular
CGIg12589	XP_034308083.1 uncharacterized protein LOC117683187 isoform X1 [Crassostrea gigas]	--	0.557955	0.0220893	1.01941	0.725243	1.29894	0.229508	1.40658	0.0360492	Up	62.1295	1.8	1	0	1580.74	2661.97	2331	3702.07	4379.64	3700.09	3165.22	2246.23	3127.38	3876.86	4113.23	4020.45	0.45592	0.767773	0.672312	1.06776	1.26319	1.06719	0.912921	0.647865	0.902008	1.11817	1.18635	1.15959	cytoplasm	K11997	TRIM2_3; tripartite motif-containing protein 2/3					PF00643	PF00643 B-box zinc finger	O
CGIg16901	Q8BIG7 CMTD1_MOUSE Catechol O-methyltransferase domain-containing protein 1 OS=Mus musculus OX=10090 GN=Comtd1 PE=1 SV=1	Comtd1	0.529429	0.021959	0.540467	0.0257253	0.847431	0.0250134	1.20464	0.0308158	Up	29.3038	13.5	3	3	9484.8	9806	8894.96	12471.4	21271	19495.6	7439.9	8485.72	7959.86	10281.7	8881.51	9610.16	0.268808	0.277911	0.252091	0.353451	0.602839	0.552523	0.210853	0.240493	0.225589	0.291394	0.25171	0.27236	cytoplasm							PF01596	PF01596 O-methyltransferase	Q
CGIg03581	XP_034331534.1 uncharacterized protein LOC105347094 [Crassostrea gigas]	--	0.654621	0.0216853	1.21677	0.0265761	1.13782	0.333313	1.6336	0.00211808	Up	20.0305	24.7	5	1	35931.9	50105.5	50231.1	65177.9	68014.7	74971.2	49315.9	57718.3	48014.5	89701.6	85259.7	78326	0.539877	0.752834	0.754722	0.979297	1.02192	1.12644	0.740971	0.867217	0.721417	1.34777	1.28103	1.17685	extracellular
CGIg21836	XP_011428825.2 uncharacterized protein LOC105329328 [Crassostrea gigas]	--	0.361373	0.0213803	1.18019	0.39595	2.48178	0.176602	1.31593	0.41271	Up	56.8198	6.4	3	3	1426.55	522.313	798.587	2764.03	2634.33	2204.45	2559.39	3407.9	851.273	3157.27	3590.18	2225.32	0.461231	0.168874	0.258198	0.893665	0.85173	0.712741	0.827499	1.10184	0.275233	1.02081	1.16078	0.719489	cytoplasm
CGIg18807	NP_001295786.1 fas-associated death domain protein-like [Crassostrea gigas]	--	0.626589	0.0209706	1.27627	0.063943	1.33849	0.0227334	1.52175	0.000165927	Up	27.7577	22.5	4	4	7976.11	6575.34	6159.35	12603.6	9030.95	11418.7	9464.72	8733.92	9522.59	13724.2	14353	14107.6	0.600397	0.494956	0.463642	0.948732	0.6798	0.859533	0.712452	0.657442	0.716808	1.03308	1.08042	1.06194	cytoplasm	K02373	FADD; FAS-associated death domain protein	map04210 Apoptosis; map04215 Apoptosis - multiple species; map04217 Necroptosis; map04620 Toll-like receptor signaling pathway; map04621 NOD-like receptor signaling pathway; map04622 RIG-I-like receptor signaling pathway; map04624 Toll and Imd signaling pathway; map04657 IL-17 signaling pathway; map04668 TNF signaling pathway	GO:0001775 cell activation; GO:0001776 leukocyte homeostasis; GO:0001817 regulation of cytokine production; GO:0001819 positive regulation of cytokine production; GO:0001910 regulation of leukocyte mediated cytotoxicity; GO:0001912 positive regulation of leukocyte mediated cytotoxicity; GO:0001914 regulation of T cell mediated cytotoxicity; GO:0001916 positive regulation of T cell mediated cytoto…	GO:0005622 intracellular anatomical structure; GO:0005634 nucleus; GO:0005737 cytoplasm; GO:0005829 cytosol; GO:0005886 plasma membrane; GO:0016020 membrane; GO:0031264 death-inducing signaling complex; GO:0031265 CD95 death-inducing signaling complex; GO:0032991 protein-containing complex; GO:0042995 cell projection; GO:0043005 neuron projection; GO:0043226 organelle; GO:0043227 membrane-bounded…	GO:0002020 protease binding; GO:0005102 signaling receptor binding; GO:0005123 death receptor binding; GO:0005126 cytokine receptor binding; GO:0005164 tumor necrosis factor receptor binding; GO:0005488 binding; GO:0005515 protein binding; GO:0019899 enzyme binding; GO:0019904 protein domain specific binding; GO:0032813 tumor necrosis factor receptor superfamily binding; GO:0033612 receptor serin…	PF01335; PF00531	PF01335 Death effector domain; PF00531 Death domain
CGIg24693	XP_011446989.2 short-chain collagen C4 [Crassostrea gigas]	--	0.287695	0.0201016	1.68214	0.0014213	4.10166	0.013846	1.42551	0.00625474	Up	29.2035	7.7	2	2	1827.01	1219.1	4224.18	7909.25	8098.14	9263.42	10965	9542.67	9312.69	12997.6	14401.2	15110.3	0.144306	0.0962901	0.333645	0.624708	0.639627	0.731666	0.866061	0.753722	0.735558	1.02661	1.13747	1.19348	extracellular
CGIg12540	XP_034307916.1 uncharacterized protein LOC105344902 [Crassostrea gigas]	--	0.553033	0.0195462	0.992125	0.876549	2.03373	0.0128057	0.882108	0.341154	Up	107.247	3.2	2	1	4515.68	2745.94	2833.24	6431.19	5770.09	6052.36	7217.33	6065.02	7247.9	7203.58	4931.85	5974.46	0.668294	0.406384	0.419304	0.951779	0.853941	0.895715	1.06812	0.897588	1.07265	1.06609	0.729886	0.884186	nucleus	K11997	TRIM2_3; tripartite motif-containing protein 2/3					PF00643	PF00643 B-box zinc finger	O
CGIg26202	Q92035 ACES_BUNFA Acetylcholinesterase OS=Bungarus fasciatus OX=8613 GN=ACHE PE=1 SV=2	ACHE	0.624615	0.0194398	1.29056	0.0444061	1.72682	0.00873649	1.19652	0.0715937	Up	71.2466	6	3	3	5298.02	3732.79	5046.94	8368.27	7448.39	6721.61	8659.32	7567.59	8082.83	8565.73	10028.1	10493.2	0.563233	0.396834	0.53654	0.889631	0.791839	0.714575	0.920573	0.804511	0.859286	0.910624	1.06609	1.11553	cytoplasm	K01049	ACHE; acetylcholinesterase [EC:3.1.1.7]	map00564 Glycerophospholipid metabolism; map04725 Cholinergic synapse	GO:0001101 response to acid chemical; GO:0001503 ossification; GO:0001507 acetylcholine catabolic process in synaptic cleft; GO:0001649 osteoblast differentiation; GO:0001654 eye development; GO:0001919 regulation of receptor recycling; GO:0001975 response to amphetamine; GO:0002076 osteoblast development; GO:0002791 regulation of peptide secretion; GO:0002793 positive regulation of peptide secre…	GO:0005576 extracellular region; GO:0005604 basement membrane; GO:0005615 extracellular space; GO:0005622 intracellular anatomical structure; GO:0005634 nucleus; GO:0005635 nuclear envelope; GO:0005641 nuclear envelope lumen; GO:0005737 cytoplasm; GO:0005783 endoplasmic reticulum; GO:0005788 endoplasmic reticulum lumen; GO:0005791 rough endoplasmic reticulum; GO:0005794 Golgi apparatus; GO:000588…	GO:0001540 amyloid-beta binding; GO:0003824 catalytic activity; GO:0003990 acetylcholinesterase activity; GO:0004104 cholinesterase activity; GO:0005488 binding; GO:0005515 protein binding; GO:0005518 collagen binding; GO:0016787 hydrolase activity; GO:0016788 hydrolase activity, acting on ester bonds; GO:0017171 serine hydrolase activity; GO:0019899 enzyme binding; GO:0033218 amide binding; GO:0…	PF00135; PF08674	PF00135 Carboxylesterase family; PF08674 Acetylcholinesterase tetramerisation domain	T
CGIg14813	XP_011413387.2 uncharacterized protein LOC105318149 [Crassostrea gigas]	--	0.591225	0.0188325	0.688957	0.0342811	1.09342	0.399206	1.06574	0.368123	Up	75.6896	8.5	5	4	2688.12	2793.76	3481.81	6189.26	4658.46	4313.51	3624.65	2993.11	3183.32	3418.01	3702.14	3325.28	0.696733	0.724114	0.90245	1.60419	1.20742	1.11802	0.939472	0.775784	0.825085	0.885912	0.959557	0.86188	nucleus
CGIg25354	Q6PGW3 ARMD3_DANRE Armadillo-like helical domain-containing protein 3 OS=Danio rerio OX=7955 GN=armh3 PE=2 SV=2	armh3	0.62903	0.0184999	0.57379	0.000768665	0.891808	0.48723	1.02285	0.785695	Up	79.1029	8.5	6	6	5856.97	8406.83	8343.53	11319.6	12736.4	11884	6501.8	6014.16	7645.45	6451.4	7567.33	6603.28	0.597412	0.857497	0.85104	1.1546	1.29911	1.21217	0.663184	0.613444	0.779836	0.658043	0.771868	0.673535	nucleus							PF08427	PF08427 Armadillo-like helical domain-containing protein 3, C-terminal	S
CGIg24527	Q5T4D3 TMTC4_HUMAN Protein O-mannosyl-transferase TMTC4 OS=Homo sapiens OX=9606 GN=TMTC4 PE=1 SV=2	TMTC4	0.264627	0.0184876	0.689072	0.313315	2.58774	0.0734025	1.00626	0.831423	Up	87.9274	2.4	2	2	706.093	915.591		2775.82	3352.36		2010.76	2066.19	2217.8	2925.68	2248.8	1159.67	0.242987	0.31508		0.955239	1.15364		0.691959	0.711035	0.763206	1.00681	0.773874	0.399075	plasma membrane	K23424	TMTC; protein O-mannosyl-transferase [EC:2.4.1.-]							R
CGIg05146	Q9BDK2 AIF1_BOVIN Allograft inflammatory factor 1 OS=Bos taurus OX=9913 GN=AIF1 PE=2 SV=1	AIF1	0.496014	0.0179127	0.318207	0.0493576	1.16032	0.538857	0.552889	0.193921	Up	16.8875	27.7	3	3	1672.72	1527.09	2502.36	4533.94	3805.75	3156.29	2289.6	1589.86	2736.86	1048.47	2177.94	431.694	0.241045	0.22006	0.360598	0.653356	0.548422	0.454832	0.32994	0.229105	0.394392	0.151088	0.313848	0.0622087	cytoplasm	K18617	AIF1; allograft inflammatory factor 1					PF13499	PF13499 EF-hand domain pair	T
CGIg10874	G5EF51 KY_CAEEL Lim and transglutaminase domain protein ltd-1 OS=Caenorhabditis elegans OX=6239 GN=ltd-1 PE=1 SV=1	ltd-1	0.635434	0.0177224	0.702878	0.0482512	1.35222	0.00486787	0.818016	0.0437196	Up	106.022	3.7	4	4	2466.13	2150.97	2412.29	3459.03	4470.71	3132.59	3377.95	3087.32	3040.01	2282.37	2758.51	2734.59	0.646703	0.564056	0.632584	0.907075	1.17237	0.821472	0.885814	0.8096	0.797194	0.598515	0.723375	0.717103	cytoplasm,nucleus	K24456	KY; kyphoscoliosis peptidase [EC:3.4.-.-]							D
CGIg19396	Q90596 MAFK_CHICK Transcription factor MafK OS=Gallus gallus OX=9031 GN=MAFK PE=2 SV=1	MAFK	0.57299	0.0176178	1.07405	0.348175	1.3443	0.103409	1.39439	0.00907075	Up	17.4363	18	2	2	2840.66	2623.01	1834.91	3948.94	4036.54	4752.23	3069.35	3674.85	3067.25	4492.32	4884.82	4303.86	0.49087	0.453259	0.317074	0.682381	0.697519	0.821191	0.530387	0.635018	0.530025	0.776277	0.844103	0.743711	nucleus	K09037	MAFF_G_K; transcription factor MAFF/G/K		GO:0000122 negative regulation of transcription by RNA polymerase II; GO:0001701 in utero embryonic development; GO:0006139 nucleobase-containing compound metabolic process; GO:0006351 DNA-templated transcription; GO:0006355 regulation of DNA-templated transcription; GO:0006357 regulation of transcription by RNA polymerase II; GO:0006366 transcription by RNA polymerase II; GO:0006725 cellular aro…	GO:0005622 intracellular anatomical structure; GO:0005634 nucleus; GO:0005654 nucleoplasm; GO:0031974 membrane-enclosed lumen; GO:0031981 nuclear lumen; GO:0043226 organelle; GO:0043227 membrane-bounded organelle; GO:0043229 intracellular organelle; GO:0043231 intracellular membrane-bounded organelle; GO:0043233 organelle lumen; GO:0070013 intracellular organelle lumen;	GO:0000976 transcription cis-regulatory region binding; GO:0000977 RNA polymerase II transcription regulatory region sequence-specific DNA binding; GO:0000978 RNA polymerase II cis-regulatory region sequence-specific DNA binding; GO:0000981 DNA-binding transcription factor activity, RNA polymerase II-specific; GO:0000987 cis-regulatory region sequence-specific DNA binding; GO:0001067 transcriptio…			K
CGIg04397	Q5ZEQ8 FJX1_XIPMA Four-jointed box protein 1 OS=Xiphophorus maculatus OX=8083 GN=fjx1 PE=2 SV=1	fjx1	0.388418	0.0169088	0.569825	0.0976831	1.24942	0.726869	1.17418	0.588008	Up	49.0055	5.1	2	2	708.333	933.465	502.324	1574.75	2466.31	1479.07	511.759	652.856	1514.28	660.551	1350.68	1134.28	0.563001	0.741942	0.39926	1.25165	1.96029	1.1756	0.406759	0.518907	1.20359	0.525023	1.07356	0.901554	extracellular	K16674	FJX1; four-jointed box protein 1	map04391 Hippo signaling pathway - fly	GO:0001654 eye development; GO:0001736 establishment of planar polarity; GO:0001737 establishment of imaginal disc-derived wing hair orientation; GO:0001738 morphogenesis of a polarized epithelium; GO:0001745 compound eye morphogenesis; GO:0002009 morphogenesis of an epithelium; GO:0002165 instar larval or pupal development; GO:0003002 regionalization; GO:0003407 neural retina development; GO:000…	GO:0005576 extracellular region; GO:0005615 extracellular space; GO:0005886 plasma membrane; GO:0016020 membrane; GO:0071944 cell periphery;	GO:0003824 catalytic activity; GO:0004672 protein kinase activity; GO:0005488 binding; GO:0005515 protein binding; GO:0016301 kinase activity; GO:0016740 transferase activity; GO:0016772 transferase activity, transferring phosphorus-containing groups; GO:0016773 phosphotransferase activity, alcohol group as acceptor; GO:0017147 Wnt-protein binding; GO:0140096 catalytic activity, acting on a prote…
CGIg01521	XP_034319212.1 uncharacterized protein LOC105329681 isoform X2 [Crassostrea gigas]	--	0.501674	0.0167342	0.636369	0.0827818	0.861922	0.511637	1.4717	0.236596	Up	18.8351	35.8	6	6	195596	161725	206416	350743	485513	287457	187736	216930	81232.3	205819	212726	296550	0.650052	0.537481	0.68601	1.16567	1.61357	0.955343	0.623927	0.720951	0.26997	0.684026	0.706981	0.985565	cytoplasm,nucleus
CGIg25583	XP_034328863.1 tripartite motif-containing protein 45-like [Crassostrea gigas]	--	0.591509	0.0157291	0.897062	0.182562	1.54476	0.027404	0.981751	0.790355	Up	62.0232	8.4	4	4	5386.88	3512.33	4344.04	7290.45	8194.49	6904	6200.09	7134.12	7123.41	6137.87	6832.64	7113.77	0.849605	0.553956	0.68513	1.14983	1.29241	1.08888	0.977862	1.12517	1.12349	0.968048	1.07763	1.12196	cytoplasm	K12026	TRIM56; tripartite motif-containing protein 56 [EC:2.3.2.27]					PF00643	PF00643 B-box zinc finger	O
CGIg02362	O57579 AMPN_CHICK Aminopeptidase Ey OS=Gallus gallus OX=9031 GN=ANPEP PE=1 SV=2	ANPEP	0.548591	0.0156664	0.688697	0.0463647	1.84423	0.202417	0.680712	0.431782	Up	114.494	3.7	3	3	2702.59	3889.36	2892.54	4899.7	5513.41	6875.7	7330.97	7417.62	2743.03	3675.41	4654.75	3576.59	0.426126	0.613249	0.456078	0.772552	0.869319	1.08412	1.1559	1.16956	0.432503	0.579515	0.733932	0.563933	plasma membrane	K11140	ANPEP, CD13; aminopeptidase N [EC:3.4.11.2]	map00480 Glutathione metabolism; map01100 Metabolic pathways; map04614 Renin-angiotensin system; map04640 Hematopoietic cell lineage	GO:0001775 cell activation; GO:0002252 immune effector process; GO:0002263 cell activation involved in immune response; GO:0002274 myeloid leukocyte activation; GO:0002275 myeloid cell activation involved in immune response; GO:0002283 neutrophil activation involved in immune response; GO:0002366 leukocyte activation involved in immune response; GO:0002376 immune system process; GO:0002443 leukoc…	GO:0005576 extracellular region; GO:0005615 extracellular space; GO:0005622 intracellular anatomical structure; GO:0005737 cytoplasm; GO:0005793 endoplasmic reticulum-Golgi intermediate compartment; GO:0005886 plasma membrane; GO:0009897 external side of plasma membrane; GO:0009986 cell surface; GO:0012505 endomembrane system; GO:0012506 vesicle membrane; GO:0016020 membrane; GO:0030141 secretory…	GO:0003824 catalytic activity; GO:0004177 aminopeptidase activity; GO:0005488 binding; GO:0008233 peptidase activity; GO:0008235 metalloexopeptidase activity; GO:0008237 metallopeptidase activity; GO:0008238 exopeptidase activity; GO:0008270 zinc ion binding; GO:0016787 hydrolase activity; GO:0033218 amide binding; GO:0038023 signaling receptor activity; GO:0042277 peptide binding; GO:0043167 ion…	PF17900; PF01433; PF11838	PF17900 Peptidase M1 N-terminal domain; PF01433 Peptidase family M1 domain; PF11838 ERAP1-like C-terminal domain	EO
CGIg20826	E9QBI7 OMA1_DANRE Metalloendopeptidase OMA1, mitochondrial OS=Danio rerio OX=7955 GN=oma1 PE=3 SV=1	oma1	0.615015	0.0154924	0.478525	0.00296212	0.821153	0.221521	0.947533	0.686703	Up	51.6783	4	2	2	1415.7		1712.75	2651.59	2692.3	2286.28	1098.11	1286.49	1468.8	1467.71	1144.96	1038.55	0.530417		0.641714	0.993468	1.00872	0.856597	0.411426	0.482008	0.550314	0.549907	0.42898	0.389112	plasma membrane	K23010	OMA1; metalloendopeptidase OMA1, mitochondrial [EC:3.4.24.-]		GO:0002021 response to dietary excess; GO:0002024 diet induced thermogenesis; GO:0005975 carbohydrate metabolic process; GO:0005996 monosaccharide metabolic process; GO:0006006 glucose metabolic process; GO:0006508 proteolysis; GO:0006515 protein quality control for misfolded or incompletely synthesized proteins; GO:0006629 lipid metabolic process; GO:0006807 nitrogen compound metabolic process; …	GO:0005622 intracellular anatomical structure; GO:0005737 cytoplasm; GO:0005739 mitochondrion; GO:0005740 mitochondrial envelope; GO:0005743 mitochondrial inner membrane; GO:0016020 membrane; GO:0019866 organelle inner membrane; GO:0031090 organelle membrane; GO:0031966 mitochondrial membrane; GO:0031967 organelle envelope; GO:0031975 envelope; GO:0043226 organelle; GO:0043227 membrane-bounded or…	GO:0003824 catalytic activity; GO:0004175 endopeptidase activity; GO:0004222 metalloendopeptidase activity; GO:0008233 peptidase activity; GO:0008237 metallopeptidase activity; GO:0016787 hydrolase activity; GO:0140096 catalytic activity, acting on a protein;	PF01435	PF01435 Peptidase family M48	O
CGIg18980	Q9NX55 HYPK_HUMAN Huntingtin-interacting protein K OS=Homo sapiens OX=9606 GN=HYPK PE=1 SV=3	HYPK	0.633876	0.0154443	0.365552	0.000209886	0.739843	0.0495319	0.77948	0.0246333	Up	14.6223	22.5	2	2	7933.75	6452.35	8521.68	12709.7	13126.6	10302.9	6416.77	5401.15	5130.24	4519.89	4268.03	4422.83	0.699715	0.569063	0.751567	1.12093	1.1577	0.90866	0.565925	0.476353	0.45246	0.398631	0.376418	0.39007	cytoplasm							PF19026	PF19026 HYPK UBA domain	R
CGIg21158	P20073 ANXA7_HUMAN Annexin A7 OS=Homo sapiens OX=9606 GN=ANXA7 PE=1 SV=3	ANXA7	0.660578	0.0150617	0.635297	0.00604204	0.489426	0.00398319	1.96502	0.00306609	Up	39.3482	7.4	2	2	22218.5	25034.5	19130.3	30308.8	32344.1	37839.9	9732.77	9857.79	12899.2	19164.4	23024.6	21653.8	0.86873	0.978835	0.747984	1.18506	1.26463	1.47952	0.380545	0.385433	0.504349	0.749318	0.900247	0.846649	mitochondria	K17095	ANXA7_11; annexin A7/11					PF00191	PF00191 Annexin	U
CGIg17528	P47980 TIS11_DROME Protein TIS11 OS=Drosophila melanogaster OX=7227 GN=Tis11 PE=2 SV=2	Tis11	0.570355	0.014839	0.873148	0.354939	1.77985	0.0502089	0.860118	0.547546	Up	43.1106	3.5	1	1	2148.29	1634.18	2292.78	4187.15	3372.5	3092.06	2922.36	2965.05	4925.66	3259.36	2558.42	3482.73	0.564184	0.429169	0.602129	1.09963	0.885686	0.812035	0.767469	0.77868	1.29358	0.855974	0.671891	0.914635	nucleus	K18753	ZFP36L; butyrate response factor	map04218 Cellular senescence	GO:0006417 regulation of translation; GO:0009889 regulation of biosynthetic process; GO:0009890 negative regulation of biosynthetic process; GO:0009892 negative regulation of metabolic process; GO:0009893 positive regulation of metabolic process; GO:0009894 regulation of catabolic process; GO:0009896 positive regulation of catabolic process; GO:0009987 cellular process; GO:0010468 regulation of g…	GO:0005622 intracellular anatomical structure; GO:0005634 nucleus; GO:0043226 organelle; GO:0043227 membrane-bounded organelle; GO:0043229 intracellular organelle; GO:0043231 intracellular membrane-bounded organelle;	GO:0003676 nucleic acid binding; GO:0003723 RNA binding; GO:0003729 mRNA binding; GO:0003730 mRNA 3'-UTR binding; GO:0005488 binding; GO:0035925 mRNA 3'-UTR AU-rich region binding; GO:0097159 organic cyclic compound binding; GO:1901363 heterocyclic compound binding;			R
CGIg25349	XP_011427718.2 uncharacterized protein C6orf163 homolog [Crassostrea gigas]	--	0.661106	0.0147941	0.819852	0.0608754	1.25832	0.0313722	0.985534	0.60313	Up	36.6122	15.4	5	5	10794.5	8507.16	9488.12	16410.6	14413.5	12723.9	12348.9	11569	12309	12000.5	12123.9	11578.5	0.679544	0.535548	0.597302	1.03309	0.907366	0.801002	0.777397	0.728296	0.774885	0.755465	0.76323	0.728894	cytoplasm
CGIg07541	XP_034299456.1 uncharacterized protein LOC105322914 [Crassostrea gigas]	--	0.627673	0.0145456	1.13679	0.0422438	1.59149	0.0145777	1.138	0.0400441	Up	26.654	17.8	4	2	81926.7	113908	111386	150811	163023	175627	175330	162816	150793	186938	184057	185420	0.49964	0.694684	0.679302	0.919738	0.994215	1.07108	1.06927	0.992953	0.919631	1.14006	1.12249	1.13081	extracellular									TV
CGIg15115	Q8TCB0 IFI44_HUMAN Interferon-induced protein 44 OS=Homo sapiens OX=9606 GN=IFI44 PE=1 SV=2	IFI44	0.614339	0.0143016	0.62728	0.00436411	0.871816	0.367284	1.17119	0.15741	Up	55.5086	8.2	4	4	5155.04	7365.44	5542.32	10100.7	8861.64	10439.7	4589.25	5679.49	5478.71	6539.55	6505.19	5398.53	0.772164	1.10326	0.830175	1.51296	1.32737	1.56374	0.687416	0.850721	0.820647	0.979548	0.974401	0.808637	cytoplasm				GO:0002252 immune effector process; GO:0002376 immune system process; GO:0006950 response to stress; GO:0006952 defense response; GO:0006955 immune response; GO:0009605 response to external stimulus; GO:0009607 response to biotic stimulus; GO:0009615 response to virus; GO:0009617 response to bacterium; GO:0043207 response to external biotic stimulus; GO:0050896 response to stimulus; GO:0051607 de…			PF07534	PF07534 TLD
CGIg01748	O43310 CTIF_HUMAN CBP80/20-dependent translation initiation factor OS=Homo sapiens OX=9606 GN=CTIF PE=1 SV=1	CTIF	0.59677	0.0141379	0.700637	0.00113199	1.23223	0.156141	0.952784	0.326911	Up	30.4414	17.3	5	5	9723.15	6704.42	9673.09	13725.8	15357	14653.8	11158.7	10030.7	10972.6	9659.99	10483.5	10500	0.687462	0.474027	0.683923	0.970466	1.08579	1.03607	0.788959	0.709206	0.775806	0.682996	0.741221	0.742385	cytoplasm				GO:0000184 nuclear-transcribed mRNA catabolic process, nonsense-mediated decay; GO:0000956 nuclear-transcribed mRNA catabolic process; GO:0006139 nucleobase-containing compound metabolic process; GO:0006401 RNA catabolic process; GO:0006402 mRNA catabolic process; GO:0006417 regulation of translation; GO:0006446 regulation of translational initiation; GO:0006725 cellular aromatic compound metabol…	GO:0005622 intracellular anatomical structure; GO:0005737 cytoplasm; GO:0005829 cytosol; GO:0048471 perinuclear region of cytoplasm;				J
CGIg07018	XP_022321782.1 uncharacterized protein LOC111123619 isoform X2 [Crassostrea virginica]	--	0.408256	0.0140641	0.41801	0.000832417	2.14532	0.0212227	0.477267	0.000853739	Up	20.1091	7.4	1	1	3688.29	1780.34	2882.11	7468.79	7031.67	5954.21	5954.98	5505.8	6454.25	2739.81	3239.05	2571.4	0.717257	0.34622	0.56048	1.45245	1.36744	1.15791	1.15806	1.07071	1.25515	0.532808	0.629894	0.500057	nucleus
CGIg23463	XP_011430289.2 uncharacterized protein LOC105330352 [Crassostrea gigas]	--	0.548683	0.0139796	0.620092	0.0018616	1.49427	0.049835	0.756319	0.0177841	Up	29.8804	9.4	2	2	64024.5	94560.1	58011.3	129992	132282	132482	113463	108361	101829	71932.9	82747.5	90104.7	0.661718	0.977315	0.599569	1.34352	1.36718	1.36925	1.17269	1.11995	1.05244	0.743454	0.855227	0.931267	cytoplasm						GO:0005488 binding; GO:0005515 protein binding;
CGIg27084	Q9CZJ2 HS12B_MOUSE Heat shock 70 kDa protein 12B OS=Mus musculus OX=10090 GN=Hspa12b PE=1 SV=1	Hspa12b	0.640838	0.0133728	0.866038	0.2969	2.68424	0.000682498	0.503464	0.00459049	Up	68.2081	5.2	3	3	4015.13	4375.08	5010.87	7751.14	5898.19	7262.47	14003.6	10920.4	11047.7	6702.34	6375.55	5032.54	0.405277	0.44161	0.505785	0.782382	0.595349	0.733056	1.41349	1.10228	1.11512	0.676518	0.643532	0.507972	cytoplasm									O
CGIg18945	P41340 ACT3_LIMPO Actin-3 OS=Limulus polyphemus OX=6850 PE=1 SV=1	--	0.521926	0.0127722	0.908467	0.0151758	0.301154	0.0016515	5.77979	5.92214e-08	Up	20.8691	6.5	1	1	143276	224461	231578	376514	400428	371334	58825.4	62209.2	59451.4	345944	349991	347235	0.499479	0.782502	0.807311	1.31258	1.39594	1.29452	0.205073	0.216869	0.207255	1.20601	1.22011	1.21051	cytoplasm,nucleus	K05692	ACTB_G1; actin beta/gamma 1	map04015 Rap1 signaling pathway; map04145 Phagosome; map04210 Apoptosis; map04390 Hippo signaling pathway; map04391 Hippo signaling pathway - fly; map04510 Focal adhesion; map04520 Adherens junction; map04530 Tight junction; map04611 Platelet activation; map04613 Neutrophil extracellular trap formation; map04670 Leukocyte transendothelial migration; map04714 Thermogenesis; map04745 Phototransduct…		GO:0005622 intracellular anatomical structure; GO:0005634 nucleus; GO:0005737 cytoplasm; GO:0005856 cytoskeleton; GO:0005886 plasma membrane; GO:0005912 adherens junction; GO:0005925 focal adhesion; GO:0015629 actin cytoskeleton; GO:0016020 membrane; GO:0030054 cell junction; GO:0030055 cell-substrate junction; GO:0043226 organelle; GO:0043227 membrane-bounded organelle; GO:0043228 non-membrane-b…				Z
CGIg26896	Q8CGS4 CHMP3_RAT Charged multivesicular body protein 3 OS=Rattus norvegicus OX=10116 GN=Chmp3 PE=1 SV=3	Chmp3	0.411538	0.0127505	0.883578	0.689415	2.83075	9.58932e-05	0.758463	0.0541637	Up	24.3589	10.7	2	2	2294.28	2499.14	2396.12	4057.46	7995.2	5417.27	7008.74	7345.19	5997.83	5219.14	4379.74	5837.17	0.487772	0.531324	0.509423	0.862629	1.69981	1.15173	1.49008	1.56161	1.27516	1.10961	0.931147	1.241	cytoplasm	K12193	VPS24, CHMP3; charged multivesicular body protein 3	map04144 Endocytosis; map04217 Necroptosis	GO:0000920 septum digestion after cytokinesis; GO:0006810 transport; GO:0006900 vesicle budding from membrane; GO:0006914 autophagy; GO:0006996 organelle organization; GO:0007032 endosome organization; GO:0007034 vacuolar transport; GO:0007041 lysosomal transport; GO:0008152 metabolic process; GO:0008333 endosome to lysosome transport; GO:0009056 catabolic process; GO:0009987 cellular process; GO…	GO:0000815 ESCRT III complex; GO:0005622 intracellular anatomical structure; GO:0005737 cytoplasm; GO:0005768 endosome; GO:0005769 early endosome; GO:0005770 late endosome; GO:0005829 cytosol; GO:0005886 plasma membrane; GO:0010008 endosome membrane; GO:0012505 endomembrane system; GO:0016020 membrane; GO:0030496 midbody; GO:0031090 organelle membrane; GO:0031410 cytoplasmic vesicle; GO:0031982 v…	GO:0002020 protease binding; GO:0005488 binding; GO:0005515 protein binding; GO:0005543 phospholipid binding; GO:0005546 phosphatidylinositol-4,5-bisphosphate binding; GO:0008289 lipid binding; GO:0019899 enzyme binding; GO:0031210 phosphatidylcholine binding; GO:0035091 phosphatidylinositol binding; GO:0042802 identical protein binding; GO:0042803 protein homodimerization activity; GO:0043167 io…			U
CGIg16983	O60232 ZNRD2_HUMAN Protein ZNRD2 OS=Homo sapiens OX=9606 GN=ZNRD2 PE=1 SV=1	ZNRD2	0.584333	0.0125288	0.773184	0.000482169	1.48334	0.0333217	0.892037	0.0124784	Up	22.3192	10.3	2	2	14238.2	21354.3	20279.8	31122.7	31811.7	32683	26800	27651	28426.5	24280	25640.7	24009.2	0.607676	0.91139	0.86553	1.3283	1.3577	1.39489	1.14381	1.18013	1.21323	1.03625	1.09433	1.0247	cytoplasm				GO:0000278 mitotic cell cycle; GO:0007049 cell cycle; GO:0009987 cellular process;		GO:0005488 binding; GO:0005515 protein binding; GO:0042802 identical protein binding;			DV
CGIg08980	Q9QY93 DCTP1_MOUSE dCTP pyrophosphatase 1 OS=Mus musculus OX=10090 GN=Dctpp1 PE=1 SV=1	Dctpp1	0.605712	0.0123475	0.676988	0.0879778	1.80906	0.00846835	0.617819	0.0558985	Up	32.8999	7.3	2	2	5994.22	6803.43	8576.02	10649.7	11829.1	12808.1	14519.2	11561.8	12585.3	10739	5808.77	7341.05	0.500293	0.567832	0.715777	0.888848	0.987289	1.069	1.21181	0.964976	1.05041	0.896303	0.484815	0.612703	cytoplasm	K16904	DCTPP1; dCTP diphosphatase [EC:3.6.1.12]	map00240 Pyrimidine metabolism; map01100 Metabolic pathways				PF12643	PF12643 MazG-like family
CGIg04369	Q5XK92 CIP2A_XENLA Protein CIP2A homolog OS=Xenopus laevis OX=8355 PE=2 SV=1	--	0.403518	0.0117917	1.05127	0.900741	2.22342	0.0457992	1.17174	0.562676	Up	107.343	1.3	1	1	792.235	449.208	865.119	1563.42	1942.43	1714.64	1041.71	1667.46	1974.6	2096.27	1248.97	2142.91	0.453008	0.256862	0.494684	0.893981	1.1107	0.980451	0.595661	0.953472	1.1291	1.19867	0.714177	1.22534	cytoplasm				GO:0000003 reproduction; GO:0007276 gamete generation; GO:0007283 spermatogenesis; GO:0008284 positive regulation of cell population proliferation; GO:0019953 sexual reproduction; GO:0022414 reproductive process; GO:0032501 multicellular organismal process; GO:0032504 multicellular organism reproduction; GO:0042127 regulation of cell population proliferation; GO:0044703 multi-organism reproductiv…	GO:0005622 intracellular anatomical structure; GO:0005737 cytoplasm; GO:0005829 cytosol; GO:0005886 plasma membrane; GO:0016020 membrane; GO:0071944 cell periphery;	GO:0005488 binding; GO:0005515 protein binding; GO:0042802 identical protein binding; GO:0042803 protein homodimerization activity; GO:0046983 protein dimerization activity;
CGIg04213	A0A1L8HCK2 C298A_XENLA Cilia- and flagella-associated protein 298-A OS=Xenopus laevis OX=8355 GN=cfap298-a PE=2 SV=1	cfap298-a	0.538248	0.0113874	0.754156	0.0250609	1.37688	0.0697772	1.01761	0.783564	Up	33.134	11	3	3	5381.57	3673.69	5208.95	8223.95	10143.3	8133.95	5850.7	6724.57	7064.9	7104.6	6555.9	6325.54	0.871641	0.595019	0.843682	1.33201	1.64289	1.31744	0.947625	1.08916	1.14428	1.15071	1.06184	1.02453	cytoplasm,nucleus	K24229	CFAP298; cilia- and flagella-associated protein 298		GO:0000902 cell morphogenesis; GO:0001655 urogenital system development; GO:0001822 kidney development; GO:0003008 system process; GO:0003352 regulation of cilium movement; GO:0006996 organelle organization; GO:0007275 multicellular organism development; GO:0007368 determination of left/right symmetry; GO:0007389 pattern specification process; GO:0009653 anatomical structure morphogenesis; GO:000…	GO:0005622 intracellular anatomical structure; GO:0005737 cytoplasm; GO:0005829 cytosol;
CGIg00814	Uncharacterized protein	--	0.322754	0.0109059	0.882629	0.0330727	2.30751	0.0294709	1.18512	0.0573021	Up	15.9765	13.2	2	2	3952.91	2990.51	7359.27	14406	14214	15694.5	12232.3	10865.2	9906.08	13193.2	13469.5	12450.6	0.331381	0.250701	0.616943	1.20768	1.19159	1.3157	1.02546	0.910855	0.830448	1.10601	1.12918	1.04376	extracellular
CGIg02517	XP_034319887.1 uncharacterized protein LOC109618176 [Crassostrea gigas]	--	0.61507	0.0106815	0.987178	0.865716	1.90528	0.00534339	0.842388	0.275096	Up	102.484	3.3	2	1	1157.4	1106.08	1481.5	2089.19	2198.22	1801.29	2289.98	2116.7	2728.55	2477.81	1900.47	1632.34	0.525881	0.502561	0.673138	0.949251	0.998789	0.818442	1.04048	0.96175	1.23975	1.12583	0.863504	0.741677	cytoplasm	K11997	TRIM2_3; tripartite motif-containing protein 2/3					PF00643	PF00643 B-box zinc finger	D
CGIg24083	Q32LE3 CETN1_BOVIN Centrin-1 OS=Bos taurus OX=9913 GN=CETN1 PE=2 SV=1	CETN1	0.390523	0.00999481	0.446461	0.000107446	0.728256	0.452945	1.56983	0.450768	Up	18.6941	14	2	2	2695.46	1327.25	2187.19	5106.03	5122.02	5673.45	832.306	2182.63		2397.05	2510.92	2191.43	0.40959	0.201683	0.332356	0.775889	0.778318	0.862111	0.126473	0.331662		0.364245	0.381547	0.332999	cytoplasm	K16465	CETN1; centrin-1		GO:0006950 response to stress; GO:0009266 response to temperature stimulus; GO:0009408 response to heat; GO:0009628 response to abiotic stimulus; GO:0009987 cellular process; GO:0033554 cellular response to stress; GO:0034605 cellular response to heat; GO:0050896 response to stimulus; GO:0051716 cellular response to stimulus;	GO:0000922 spindle pole; GO:0005622 intracellular anatomical structure; GO:0005737 cytoplasm; GO:0005813 centrosome; GO:0005814 centriole; GO:0005815 microtubule organizing center; GO:0005819 spindle; GO:0005856 cytoskeleton; GO:0005929 cilium; GO:0015630 microtubule cytoskeleton; GO:0032391 photoreceptor connecting cilium; GO:0035869 ciliary transition zone; GO:0042995 cell projection; GO:004300…	GO:0005488 binding; GO:0005515 protein binding; GO:0008017 microtubule binding; GO:0008092 cytoskeletal protein binding; GO:0015631 tubulin binding; GO:0031683 G-protein beta/gamma-subunit complex binding; GO:0032795 heterotrimeric G-protein binding; GO:0044877 protein-containing complex binding;	PF13499	PF13499 EF-hand domain pair	ZD
CGIg01474	P84022 SMAD3_HUMAN Mothers against decapentaplegic homolog 3 OS=Homo sapiens OX=9606 GN=SMAD3 PE=1 SV=1	SMAD3	0.642833	0.00981848	1.19309	0.0912402	1.21293	0.103764	1.53017	0.00517938	Up	47.0366	9.6	4	3	10653.1	12844.8	13396.6	17871.1	21678.7	17843.6	13612.3	16670.3	14467.7	24845.4	21037.9	22592.3	0.542748	0.654409	0.682522	0.91049	1.10448	0.909086	0.693513	0.849309	0.737095	1.26581	1.07183	1.15102	cytoplasm	K23605	SMAD3; mothers against decapentaplegic homolog 3	map04068 FoxO signaling pathway; map04110 Cell cycle; map04144 Endocytosis; map04218 Cellular senescence; map04310 Wnt signaling pathway; map04350 TGF-beta signaling pathway; map04371 Apelin signaling pathway; map04390 Hippo signaling pathway; map04520 Adherens junction; map04550 Signaling pathways regulating pluripotency of stem cells; map04659 Th17 cell differentiation	GO:0000122 negative regulation of transcription by RNA polymerase II; GO:0000902 cell morphogenesis; GO:0001501 skeletal system development; GO:0001503 ossification; GO:0001558 regulation of cell growth; GO:0001649 osteoblast differentiation; GO:0001654 eye development; GO:0001655 urogenital system development; GO:0001657 ureteric bud development; GO:0001666 response to hypoxia; GO:0001701 in ute…	GO:0000228 nuclear chromosome; GO:0000785 chromatin; GO:0005622 intracellular anatomical structure; GO:0005634 nucleus; GO:0005635 nuclear envelope; GO:0005637 nuclear inner membrane; GO:0005654 nucleoplasm; GO:0005667 transcription regulator complex; GO:0005694 chromosome; GO:0005737 cytoplasm; GO:0005829 cytosol; GO:0005886 plasma membrane; GO:0012505 endomembrane system; GO:0016020 membrane; G…	GO:0000976 transcription cis-regulatory region binding; GO:0000977 RNA polymerase II transcription regulatory region sequence-specific DNA binding; GO:0000978 RNA polymerase II cis-regulatory region sequence-specific DNA binding; GO:0000981 DNA-binding transcription factor activity, RNA polymerase II-specific; GO:0000987 cis-regulatory region sequence-specific DNA binding; GO:0001067 transcriptio…	PF03165	PF03165 MH1 domain	TK
CGIg03646	VDH95000.1 Hypothetical predicted protein [Mytilus galloprovincialis]	--	0.555557	0.00958513	0.629529	0.00284829	1.34194	0.065692	0.844412	0.0430458	Up	11.3009	9.3	1	1	9729.75	9051.08	6591.76	16684.5	14632.5	14353.5	11182.1	11907.1	10959.3	8625.99	9830.07	10294.8	0.884308	0.822626	0.599105	1.5164	1.32991	1.30454	1.01631	1.0822	0.996056	0.78399	0.893426	0.935666	mitochondria				GO:0006508 proteolysis; GO:0006511 ubiquitin-dependent protein catabolic process; GO:0006807 nitrogen compound metabolic process; GO:0006873 intracellular monoatomic ion homeostasis; GO:0006879 intracellular iron ion homeostasis; GO:0008152 metabolic process; GO:0009056 catabolic process; GO:0009057 macromolecule catabolic process; GO:0009653 anatomical structure morphogenesis; GO:0009987 cellula…	GO:0005622 intracellular anatomical structure; GO:0005634 nucleus; GO:0005654 nucleoplasm; GO:0005737 cytoplasm; GO:0005829 cytosol; GO:0031974 membrane-enclosed lumen; GO:0031981 nuclear lumen; GO:0043226 organelle; GO:0043227 membrane-bounded organelle; GO:0043229 intracellular organelle; GO:0043231 intracellular membrane-bounded organelle; GO:0043233 organelle lumen; GO:0070013 intracellular o…	GO:0005488 binding; GO:0005515 protein binding; GO:0019899 enzyme binding; GO:0031625 ubiquitin protein ligase binding; GO:0044389 ubiquitin-like protein ligase binding;	PF00240	PF00240 Ubiquitin family	OR
CGIg05210	Q9W021 RM23_DROME 39S ribosomal protein L23, mitochondrial OS=Drosophila melanogaster OX=7227 GN=mRpL23 PE=2 SV=1	mRpL23	0.483819	0.00951308	0.633041	0.0886101	2.00805	0.0255042	0.65159	0.151122	Up	21.3686	11.9	2	2	2914.96	3181.4	2440.39	6437.19	6756.63	4450.72	6306.92	3905.71	6929.64	4935.22	2855.81	3378.7	0.495379	0.540659	0.414729	1.09396	1.14825	0.756371	1.07182	0.66375	1.17765	0.838708	0.485327	0.574188	nucleus	K02892	RP-L23, MRPL23, rplW; large subunit ribosomal protein L23	map03010 Ribosome	GO:0006412 translation; GO:0006414 translational elongation; GO:0006415 translational termination; GO:0006518 peptide metabolic process; GO:0006807 nitrogen compound metabolic process; GO:0008152 metabolic process; GO:0009058 biosynthetic process; GO:0009059 macromolecule biosynthetic process; GO:0009987 cellular process; GO:0010467 gene expression; GO:0016043 cellular component organization; GO:…	GO:0000313 organellar ribosome; GO:0000315 organellar large ribosomal subunit; GO:0001650 fibrillar center; GO:0005622 intracellular anatomical structure; GO:0005634 nucleus; GO:0005730 nucleolus; GO:0005737 cytoplasm; GO:0005739 mitochondrion; GO:0005740 mitochondrial envelope; GO:0005743 mitochondrial inner membrane; GO:0005759 mitochondrial matrix; GO:0005761 mitochondrial ribosome; GO:0005762…	GO:0003676 nucleic acid binding; GO:0003723 RNA binding; GO:0003735 structural constituent of ribosome; GO:0005198 structural molecule activity; GO:0005488 binding; GO:0097159 organic cyclic compound binding; GO:1901363 heterocyclic compound binding;			J
CGIg16722	Q0ZDF7 URAD_AMICA 2-oxo-4-hydroxy-4-carboxy-5-ureidoimidazoline decarboxylase OS=Amia calva OX=7924 GN=urad PE=3 SV=1	urad	0.402023	0.00948967	0.601199	0.00160561	1.65228	0.0730448	0.90507	0.434424	Up	20.3202	11.6	2	2	16638.9	22062.2	11075.2	39922.8	44174.9	39716.9	22799	31199.2	28246.4	22043.8	26093.5	26300	0.362621	0.480813	0.241367	0.870058	0.962726	0.86557	0.496871	0.679941	0.615588	0.480411	0.568669	0.573169	cytoplasm	K13485	PRHOXNB, URAD; 2-oxo-4-hydroxy-4-carboxy-5-ureidoimidazoline decarboxylase [EC:4.1.1.97]	map00230 Purine metabolism; map01100 Metabolic pathways			GO:0003824 catalytic activity; GO:0016829 lyase activity; GO:0016830 carbon-carbon lyase activity; GO:0016831 carboxy-lyase activity;	PF09349	PF09349 OHCU decarboxylase	K
CGIg03684	P26697 GSTA3_CHICK Glutathione S-transferase 3 OS=Gallus gallus OX=9031 PE=1 SV=2	--	0.508444	0.00926148	1.10346	0.415218	0.654568	0.241219	3.31557	0.0274149	Up	25.746	3.6	1	1	7485.76	5440.04	6002.01	9938.08	14172.5	13116.4	1721.23	4211.66	6456.64	14768.3	12493.2	13816.9	0.574299	0.417354	0.460467	0.762439	1.0873	1.00627	0.132051	0.323114	0.495346	1.13301	0.958461	1.06002	mitochondria	K00799	GST, gst; glutathione S-transferase [EC:2.5.1.18]	map00480 Glutathione metabolism; map00980 Metabolism of xenobiotics by cytochrome P450; map00982 Drug metabolism - cytochrome P450; map00983 Drug metabolism - other enzymes; map01100 Metabolic pathways; map04212 Longevity regulating pathway - worm	GO:0000302 response to reactive oxygen species; GO:0006518 peptide metabolic process; GO:0006575 cellular modified amino acid metabolic process; GO:0006749 glutathione metabolic process; GO:0006790 sulfur compound metabolic process; GO:0006805 xenobiotic metabolic process; GO:0006807 nitrogen compound metabolic process; GO:0006950 response to stress; GO:0006979 response to oxidative stress; GO:00…	GO:0005622 intracellular anatomical structure; GO:0005737 cytoplasm; GO:0005739 mitochondrion; GO:0005829 cytosol; GO:0043226 organelle; GO:0043227 membrane-bounded organelle; GO:0043229 intracellular organelle; GO:0043231 intracellular membrane-bounded organelle;	GO:0003824 catalytic activity; GO:0004364 glutathione transferase activity; GO:0004601 peroxidase activity; GO:0004602 glutathione peroxidase activity; GO:0005488 binding; GO:0005515 protein binding; GO:0016209 antioxidant activity; GO:0016491 oxidoreductase activity; GO:0016684 oxidoreductase activity, acting on peroxide as acceptor; GO:0016740 transferase activity; GO:0016765 transferase activi…	PF02798; PF14497	PF02798 Glutathione S-transferase, N-terminal domain; PF14497 Glutathione S-transferase, C-terminal domain	O
CGIg14396	P46409 GSTMU_RABIT Glutathione S-transferase Mu 1 OS=Oryctolagus cuniculus OX=9986 PE=1 SV=2	--	0.560096	0.00906901	0.271732	3.66351e-05	0.566362	0.0411857	0.856612	0.486103	Up	25.1177	7	2	2	24385.4	18237.9	25995.2	42324.6	36223.6	43963.8	17411.7	11229.3	10221.8	10527.5	11483.7	11279.2	0.765398	0.57244	0.815923	1.32846	1.13697	1.37991	0.546511	0.352461	0.320837	0.330432	0.360445	0.354026	cytoplasm	K00799	GST, gst; glutathione S-transferase [EC:2.5.1.18]	map00480 Glutathione metabolism; map00980 Metabolism of xenobiotics by cytochrome P450; map00982 Drug metabolism - cytochrome P450; map00983 Drug metabolism - other enzymes; map01100 Metabolic pathways; map04212 Longevity regulating pathway - worm				PF02798; PF14497	PF02798 Glutathione S-transferase, N-terminal domain; PF14497 Glutathione S-transferase, C-terminal domain	O
CGIg18736	O95749 GGPPS_HUMAN Geranylgeranyl pyrophosphate synthase OS=Homo sapiens OX=9606 GN=GGPS1 PE=1 SV=1	GGPS1	0.606542	0.0088189	0.581903	0.21956	1.03103	0.845081	0.930508	0.765101	Up	34.2544	6.7	2	2	2043.36	1547.65	1539.55	2601.03	2769.59	3088.06		1549.55	1976.94	1990.53		1290.9	0.687658	0.520835	0.518109	0.875335	0.932061	1.03924		0.521475	0.665306	0.669879		0.43443	cytoplasm	K00804	GGPS1; geranylgeranyl diphosphate synthase, type III [EC:2.5.1.1 2.5.1.10 2.5.1.29]	map00900 Terpenoid backbone biosynthesis; map01100 Metabolic pathways	GO:0000003 reproduction; GO:0003006 developmental process involved in reproduction; GO:0006066 alcohol metabolic process; GO:0006629 lipid metabolic process; GO:0006694 steroid biosynthetic process; GO:0006695 cholesterol biosynthetic process; GO:0006720 isoprenoid metabolic process; GO:0007275 multicellular organism development; GO:0007276 gamete generation; GO:0007281 germ cell development; GO:…	GO:0005622 intracellular anatomical structure; GO:0005737 cytoplasm; GO:0005829 cytosol;	GO:0003824 catalytic activity; GO:0004161 dimethylallyltranstransferase activity; GO:0004311 farnesyltranstransferase activity; GO:0004337 geranyltranstransferase activity; GO:0004659 prenyltransferase activity; GO:0005488 binding; GO:0005515 protein binding; GO:0016740 transferase activity; GO:0016765 transferase activity, transferring alkyl or aryl (other than methyl) groups; GO:0042802 identic…	PF00348	PF00348 Polyprenyl synthetase	H
CGIg15364	Q6IR75 CSN2_XENLA COP9 signalosome complex subunit 2 (Fragment) OS=Xenopus laevis OX=8355 GN=csn2 PE=2 SV=1	csn2	0.663059	0.00875152	0.341247	0.022998	0.914943	0.349008	0.562501	0.107945	Up	52.9152	5.7	2	2	5755.36	4764.45	4696.77	8102.43	6819.23	8027.43	5036.06	4642.3	4243.95	4003.39	2506.34	1321.57	0.880196	0.728652	0.718301	1.23915	1.0429	1.22768	0.770191	0.70997	0.649048	0.612259	0.383308	0.202115	cytoplasm	K12176	COPS2, CSN2, TRIP15; COP9 signalosome complex subunit 2		GO:0000003 reproduction; GO:0000338 protein deneddylation; GO:0002009 morphogenesis of an epithelium; GO:0003006 developmental process involved in reproduction; GO:0006355 regulation of DNA-templated transcription; GO:0006508 proteolysis; GO:0006807 nitrogen compound metabolic process; GO:0007275 multicellular organism development; GO:0007276 gamete generation; GO:0007281 germ cell development; G…	GO:0005622 intracellular anatomical structure; GO:0005634 nucleus; GO:0005667 transcription regulator complex; GO:0005737 cytoplasm; GO:0008180 COP9 signalosome; GO:0008230 ecdysone receptor holocomplex; GO:0008231 repressor ecdysone receptor complex; GO:0032991 protein-containing complex; GO:0043226 organelle; GO:0043227 membrane-bounded organelle; GO:0043229 intracellular organelle; GO:0043231 …	GO:0003712 transcription coregulator activity; GO:0003714 transcription corepressor activity; GO:0005102 signaling receptor binding; GO:0005488 binding; GO:0005515 protein binding; GO:0008134 transcription factor binding; GO:0016922 nuclear receptor binding; GO:0042802 identical protein binding; GO:0042803 protein homodimerization activity; GO:0046983 protein dimerization activity; GO:0051427 hor…	PF01399	PF01399 PCI domain	OT
CGIg26772	A5PLI4 LR2BP_DANRE LRP2-binding protein OS=Danio rerio OX=7955 GN=lrp2bp PE=2 SV=1	lrp2bp	0.608215	0.00807327	0.399544	4.28454e-05	0.79579	0.135177	0.825484	0.0730486	Up	39.2884	17.4	6	6	9483.29	12814.7	12564.9	17809.6	19795.6	19714.8	8299.51	8914.8	10529.2	7579.12	8093.69	7229.01	0.50278	0.679403	0.666158	0.94422	1.04951	1.04523	0.440019	0.47264	0.558231	0.401826	0.429108	0.383264	cytoplasm					GO:0005622 intracellular anatomical structure; GO:0005737 cytoplasm;				MOT
CGIg25711	Q9BVG4 PBDC1_HUMAN Protein PBDC1 OS=Homo sapiens OX=9606 GN=PBDC1 PE=1 SV=1	PBDC1	0.467748	0.00786149	0.434384	0.0108847	0.986128	0.957783	0.941733	0.710217	Up	19.3657	12	2	2	7051.75	4625.02	5958.27	14930.8	11949.2	10822	5985.54	6654.64	4750.24	3935.28	5531.61	6910.24	0.639992	0.419751	0.540752	1.35507	1.08447	0.982168	0.543227	0.603952	0.431116	0.357152	0.50203	0.62715	cytoplasm					GO:0005622 intracellular anatomical structure; GO:0005737 cytoplasm;				S
CGIg15111	P27473 IFI44_PANTR Interferon-induced protein 44 OS=Pan troglodytes OX=9598 GN=IFI44 PE=1 SV=1	IFI44	0.200788	0.00770651	0.659399	0.301378	14.5025	5.15867e-05	0.226447	0.000210488	Up	35.516	10.8	3	3	1177.78	778.595	1159.96	2751.32	6023.81	6745.41	16564.1	14947.4	13683.4	2845.6	4050.15	3338.48	0.158987	0.105102	0.156582	0.371397	0.813146	0.910554	2.23596	2.01772	1.8471	0.384124	0.546724	0.450657	cytoplasm				GO:0002252 immune effector process; GO:0002376 immune system process; GO:0006950 response to stress; GO:0006952 defense response; GO:0006955 immune response; GO:0009605 response to external stimulus; GO:0009607 response to biotic stimulus; GO:0009615 response to virus; GO:0009617 response to bacterium; GO:0043207 response to external biotic stimulus; GO:0050896 response to stimulus; GO:0051607 de…
CGIg14830	Q2HJ41 PRP18_BOVIN Pre-mRNA-splicing factor 18 OS=Bos taurus OX=9913 GN=PRPF18 PE=2 SV=1	PRPF18	0.551335	0.00764258	0.909632	0.137873	1.85045	0.00884692	0.891606	0.181335	Up	40.7014	12.4	3	3	3114.65	4696.39	4044.31	6986.1	7522.65	6994.23	6962.48	6862.96	8112.27	5936.68	6794.49	6828.63	0.465755	0.702282	0.604772	1.04468	1.12491	1.04589	1.04115	1.02626	1.21308	0.887751	1.01602	1.02113	cytoplasm	K12817	PRPF18, PRP18; pre-mRNA-splicing factor 18	map03040 Spliceosome	GO:0000350 generation of catalytic spliceosome for second transesterification step; GO:0000375 RNA splicing, via transesterification reactions; GO:0000377 RNA splicing, via transesterification reactions with bulged adenosine as nucleophile; GO:0000393 spliceosomal conformational changes to generate catalytic conformation; GO:0000398 mRNA splicing, via spliceosome; GO:0000956 nuclear-transcribed m…	GO:0005622 intracellular anatomical structure; GO:0005634 nucleus; GO:0005681 spliceosomal complex; GO:0005682 U5 snRNP; GO:0005684 U2-type spliceosomal complex; GO:0016020 membrane; GO:0030532 small nuclear ribonucleoprotein complex; GO:0032991 protein-containing complex; GO:0043226 organelle; GO:0043227 membrane-bounded organelle; GO:0043229 intracellular organelle; GO:0043231 intracellular mem…		PF08799	PF08799 pre-mRNA processing factor 4 (PRP4) like	A
CGIg13288	Q6NRK9 CCNQ_XENLA Cyclin-Q OS=Xenopus laevis OX=8355 GN=ccnq PE=2 SV=2	ccnq	0.406569	0.00755003	0.95598	0.707911	0.830002	0.654056	2.83293	0.246119	Up	26.663	8.8	2	2	4319.67		3361.18	8676.31	8641.78	11019.7	1764.51		4610.61	7794.43	9875.37	9420.59	0.659556		0.513206	1.32475	1.31948	1.68256	0.269417		0.703978	1.1901	1.50784	1.4384	cytoplasm	K23964	CCNQ, FAM58A; cyclin-Q		GO:0000079 regulation of cyclin-dependent protein serine/threonine kinase activity; GO:0001932 regulation of protein phosphorylation; GO:0001934 positive regulation of protein phosphorylation; GO:0006355 regulation of DNA-templated transcription; GO:0006357 regulation of transcription by RNA polymerase II; GO:0009889 regulation of biosynthetic process; GO:0009891 positive regulation of biosynthet…	GO:0000307 cyclin-dependent protein kinase holoenzyme complex; GO:0005622 intracellular anatomical structure; GO:0005634 nucleus; GO:0032991 protein-containing complex; GO:0043226 organelle; GO:0043227 membrane-bounded organelle; GO:0043229 intracellular organelle; GO:0043231 intracellular membrane-bounded organelle; GO:0061695 transferase complex, transferring phosphorus-containing groups; GO:19…	GO:0008047 enzyme activator activity; GO:0016538 cyclin-dependent protein serine/threonine kinase regulator activity; GO:0019207 kinase regulator activity; GO:0019209 kinase activator activity; GO:0019887 protein kinase regulator activity; GO:0030234 enzyme regulator activity; GO:0030295 protein kinase activator activity; GO:0098772 molecular function regulator activity;	PF00134	PF00134 Cyclin, N-terminal domain	D
CGIg07351	Q8CCA0 DCNL4_MOUSE DCN1-like protein 4 OS=Mus musculus OX=10090 GN=Dcun1d4 PE=2 SV=1	Dcun1d4	0.46892	0.00732199	0.3824	0.00254367	1.19825	0.278772	0.680568	0.0343651	Up	27.5263	5.1	1	1	1104.77	987.551	710.791	1942.05	2280.31	1755.44	1012.38	1296.18	1050.28	788.143	735.799		0.72065	0.644188	0.463655	1.26682	1.48747	1.14509	0.660382	0.84551	0.685104	0.514113	0.479968		nucleus	K17824	DCUN1D4_5; DCN1-like protein 4/5		GO:0006807 nitrogen compound metabolic process; GO:0008152 metabolic process; GO:0009892 negative regulation of metabolic process; GO:0009893 positive regulation of metabolic process; GO:0009987 cellular process; GO:0010604 positive regulation of macromolecule metabolic process; GO:0010605 negative regulation of macromolecule metabolic process; GO:0019222 regulation of metabolic process; GO:00195…	GO:0000151 ubiquitin ligase complex; GO:0005622 intracellular anatomical structure; GO:0005634 nucleus; GO:0032991 protein-containing complex; GO:0043226 organelle; GO:0043227 membrane-bounded organelle; GO:0043229 intracellular organelle; GO:0043231 intracellular membrane-bounded organelle; GO:1902494 catalytic complex; GO:1990234 transferase complex;	GO:0005488 binding; GO:0005515 protein binding; GO:0019899 enzyme binding; GO:0031624 ubiquitin conjugating enzyme binding; GO:0032182 ubiquitin-like protein binding; GO:0044390 ubiquitin-like protein conjugating enzyme binding; GO:0097602 cullin family protein binding;			S
CGIg08662	XP_034302996.1 uncharacterized protein LOC109617614 [Crassostrea gigas]	--	0.459744	0.00731358	0	0	1.05898	0	0	0	Up	49.7465	3	1	1	1164.86	1211.83		2150.89	2908.72	2694.79	1258.43						0.562438	0.58512		1.03853	1.40444	1.30115	0.607618						plasma membrane	K17353	TSPAN18; tetraspanin-18
CGIg09901	Q9H0C1 ZMY12_HUMAN Zinc finger MYND domain-containing protein 12 OS=Homo sapiens OX=9606 GN=ZMYND12 PE=1 SV=3	ZMYND12	0.654805	0.00728749	0.394343	0.0205665	0.824653	0.0846958	0.730281	0.229594	Up	41.3624	7.9	3	3	13815.4	12054.4	10501	19297.1	17408.6	18838.7	10327.7	10059.8	9605.76	4030.09	8917.06	8956.37	0.884681	0.771909	0.672436	1.2357	1.11477	1.20635	0.661344	0.644184	0.615111	0.25807	0.57101	0.573527	cytoplasm					GO:0005622 intracellular anatomical structure;		PF01753	PF01753 MYND finger
CGIg22093	Q58E03 DJC25_XENLA DnaJ homolog subfamily C member 25 OS=Xenopus laevis OX=8355 GN=dnajc25 PE=2 SV=1	dnajc25	0.465313	0.00721242	0.56364	0.00069693	1.14009	0.594603	1.06247	0.636541	Up	41.1144	5.3	2	2	3669.97	3381.7	2287.91	7251.77	6061.29	6758.54	3991.91	2500.19	4155.83	3945.41	3811.28	3556.47	0.57184	0.526922	0.356492	1.12994	0.944445	1.05309	0.622003	0.38957	0.647545	0.614758	0.593859	0.554155	endoplasmic reticulum	K19371	DNAJC25; DnaJ homolog subfamily C member 25					PF00226	PF00226 DnaJ domain	O
CGIg05381	G3I8R9 BIP_CRIGR Endoplasmic reticulum chaperone BiP OS=Cricetulus griseus OX=10029 GN=HSPA5 PE=1 SV=1	HSPA5	0.604197	0.0069001	0.602736	0.00747738	1.26541	0.0304283	0.788348	0.0342189	Up	70.6157	6.5	4	4	12104.1	11041.9	14040.8	20239.4	23116	18192.2	15149.3	15619.5	16287.8	13987.7	12282.5	10826.8	0.549996	0.501731	0.637997	0.919653	1.05036	0.82663	0.688364	0.709729	0.740098	0.635583	0.558099	0.491956	endoplasmic reticulum	K09490	HSPA5, BIP; endoplasmic reticulum chaperone BiP [EC:3.6.4.10]	map03060 Protein export; map04141 Protein processing in endoplasmic reticulum; map04612 Antigen processing and presentation; map04918 Thyroid hormone synthesis	GO:0006355 regulation of DNA-templated transcription; GO:0006357 regulation of transcription by RNA polymerase II; GO:0006457 protein folding; GO:0006508 proteolysis; GO:0006511 ubiquitin-dependent protein catabolic process; GO:0006807 nitrogen compound metabolic process; GO:0006810 transport; GO:0006915 apoptotic process; GO:0006950 response to stress; GO:0006983 ER overload response; GO:0006984…	GO:0005576 extracellular region; GO:0005615 extracellular space; GO:0005622 intracellular anatomical structure; GO:0005634 nucleus; GO:0005737 cytoplasm; GO:0005739 mitochondrion; GO:0005783 endoplasmic reticulum; GO:0005788 endoplasmic reticulum lumen; GO:0005789 endoplasmic reticulum membrane; GO:0005790 smooth endoplasmic reticulum; GO:0005793 endoplasmic reticulum-Golgi intermediate compartme…	GO:0000166 nucleotide binding; GO:0003824 catalytic activity; GO:0005488 binding; GO:0005509 calcium ion binding; GO:0005515 protein binding; GO:0005524 ATP binding; GO:0016462 pyrophosphatase activity; GO:0016787 hydrolase activity; GO:0016817 hydrolase activity, acting on acid anhydrides; GO:0016818 hydrolase activity, acting on acid anhydrides, in phosphorus-containing anhydrides; GO:0016887 A…			O
CGIg22313	XP_011441374.2 uncharacterized protein LOC105338090 [Crassostrea gigas]	--	0.435832	0.00682932	0.495238	0.0123751	1.81847	0.000990495	0.624868	0.00236794	Up	21.5632	13.2	2	2	14173.4	13719.8	14831.5	43470.6	27079.9	27479.5	28234.3	26725.7	22733.4	16750.1	16164.3	15633.7	0.346419	0.335331	0.362503	1.06249	0.661873	0.671641	0.690089	0.653216	0.555638	0.409398	0.39508	0.382111	cytoplasm,nucleus
CGIg27958	XP_034309370.1 uncharacterized protein LOC105336218 isoform X2 [Crassostrea gigas]	--	0.461247	0.00671735	1.43721	0.0220912	2.6485	0.00395865	1.17649	0.240669	Up	44.9356	17.2	5	5	297967	481279	449330	920663	825119	917815	1.15956e+06	1.15903e+06	935289	1.4125e+06	1.35923e+06	1.05642e+06	0.347441	0.561189	0.523935	1.07353	0.962119	1.07021	1.35209	1.35148	1.09058	1.64703	1.58491	1.23182	endoplasmic reticulum
CGIg23087	XP_034324741.1 uncharacterized protein LOC105333450 isoform X1 [Crassostrea gigas]	--	0.615715	0.00642311	2.00048	0.0016381	1.61327	0.0135178	2.01395	0.00312111	Up	55.8793	7.1	3	3	3466.61	3395.71	3547.64	5781.44	6412.96	4712.7	5788.02	6516.92	4489.11	11383.8	11595.8	10842.7	0.603384	0.591044	0.617488	1.0063	1.11621	0.820274	1.00744	1.13431	0.781357	1.98142	2.01832	1.88724	nucleus							PF12736; PF00536	PF12736 Cell-cycle sustaining, positive selection, ; PF00536 SAM domain (Sterile alpha motif)
CGIg25545	XP_034329710.1 serine/Arginine-related protein 53-like [Crassostrea gigas]	--	0.658399	0.00637407	0.816189	0.0313552	2.26846	0.00311787	0.546476	0.00708941	Up	35.1235	4.3	1	1	3516.24	3464.36	2740.54	4877.47	4890.46	4996.88	7094.26	8743.65	6214.09	4496.35	3618.36	3936.17	0.653767	0.644121	0.509543	0.906859	0.909273	0.929059	1.31902	1.62569	1.15537	0.835998	0.672753	0.731845	nucleus	K24594	RSRC1; arginine/serine-rich coiled-coil protein 1
CGIg18401	Q02368 NDUB7_BOVIN NADH dehydrogenase [ubiquinone] 1 beta subcomplex subunit 7 OS=Bos taurus OX=9913 GN=NDUFB7 PE=1 SV=2	NDUFB7	0.648471	0.00635896	0.647078	0.0151229	0.990726	0.832818	1.00719	0.863403	Up	15.526	22.7	2	2	136819	156425	152216	239173	249729	198039	181950	165778	93602.7	127787	148171	168546	0.462024	0.528231	0.514017	0.80766	0.843306	0.668755	0.614424	0.559812	0.316086	0.431524	0.500355	0.569161	extracellular	K03963	NDUFB7; NADH dehydrogenase (ubiquinone) 1 beta subcomplex subunit 7	map00190 Oxidative phosphorylation; map01100 Metabolic pathways; map04714 Thermogenesis; map04723 Retrograde endocannabinoid signaling	GO:0006091 generation of precursor metabolites and energy; GO:0006119 oxidative phosphorylation; GO:0006120 mitochondrial electron transport, NADH to ubiquinone; GO:0006139 nucleobase-containing compound metabolic process; GO:0006163 purine nucleotide metabolic process; GO:0006725 cellular aromatic compound metabolic process; GO:0006753 nucleoside phosphate metabolic process; GO:0006793 phosphoru…	GO:0005622 intracellular anatomical structure; GO:0005737 cytoplasm; GO:0005739 mitochondrion; GO:0005740 mitochondrial envelope; GO:0005743 mitochondrial inner membrane; GO:0005746 mitochondrial respirasome; GO:0005747 mitochondrial respiratory chain complex I; GO:0005758 mitochondrial intermembrane space; GO:0016020 membrane; GO:0019866 organelle inner membrane; GO:0030964 NADH dehydrogenase co…	GO:0003824 catalytic activity; GO:0003954 NADH dehydrogenase activity; GO:0008137 NADH dehydrogenase (ubiquinone) activity; GO:0016491 oxidoreductase activity; GO:0016651 oxidoreductase activity, acting on NAD(P)H; GO:0016655 oxidoreductase activity, acting on NAD(P)H, quinone or similar compound as acceptor; GO:0050136 NADH dehydrogenase (quinone) activity;			C
CGIg08208	Q5TJE6 PFD6_CANLF Prefoldin subunit 6 OS=Canis lupus familiaris OX=9615 GN=PFDN6 PE=3 SV=1	PFDN6	0.252538	0.00635228	0.766557	0.259548	5.33596	0.00312597	0.568859	0.0570333	Up	14.5135	16.8	2	2	22901.5	11769.3	9682.06	66731.1	59492.1	49405.3	66894.8	81591.1	88179.5	54176.1	28305.1	52148	0.312363	0.160527	0.132057	0.910171	0.811436	0.673858	0.912405	1.11285	1.20272	0.738929	0.386064	0.711267	cytoplasm	K04798	pfdB, PFDN6; prefoldin beta subunit		GO:0006457 protein folding; GO:0009987 cellular process; GO:0016043 cellular component organization; GO:0022607 cellular component assembly; GO:0043933 protein-containing complex organization; GO:0044085 cellular component biogenesis; GO:0051131 chaperone-mediated protein complex assembly; GO:0065003 protein-containing complex assembly; GO:0071840 cellular component organization or biogenesis;	GO:0005622 intracellular anatomical structure; GO:0005634 nucleus; GO:0005737 cytoplasm; GO:0005829 cytosol; GO:0016272 prefoldin complex; GO:0032991 protein-containing complex; GO:0043226 organelle; GO:0043227 membrane-bounded organelle; GO:0043229 intracellular organelle; GO:0043231 intracellular membrane-bounded organelle;	GO:0005488 binding; GO:0005515 protein binding; GO:0051082 unfolded protein binding; GO:0051087 protein-folding chaperone binding;			O
CGIg28164	XP_011447506.2 calmodulin isoform X1 [Crassostrea gigas]	--	0.633425	0.00626752	0.334619	0.00122472	0.684058	0.00400242	0.772257	0.0941279	Up	16.2982	21.8	3	3	5933.25	5471.57	6071.56	9850.71	9948.07	7791.49	4323.21	4056.91	3574.74	3510.79	2459.41	3262.02	0.645853	0.595598	0.660909	1.07228	1.08288	0.848129	0.470595	0.441608	0.389122	0.382161	0.267715	0.355081	cytoplasm	K02183	CALM; calmodulin	map04014 Ras signaling pathway; map04015 Rap1 signaling pathway; map04020 Calcium signaling pathway; map04022 cGMP-PKG signaling pathway; map04024 cAMP signaling pathway; map04070 Phosphatidylinositol signaling system; map04114 Oocyte meiosis; map04218 Cellular senescence; map04261 Adrenergic signaling in cardiomyocytes; map04270 Vascular smooth muscle contraction; map04371 Apelin signaling pathw…				PF13499	PF13499 EF-hand domain pair	T
CGIg16892	XP_011440122.2 uncharacterized protein LOC105337187 [Crassostrea gigas]	--	0.640691	0.00621488	0.710237	0.0141021	1.14222	0.0587342	0.970518	0.571219	Up	194.736	3.6	6	6	4924.32	5131.66	4737.19	7251.39	6888.35	8949.66	5182.37	5672.28	6042.45	5567.3	5403.27	5428.38	0.811503	0.845671	0.780664	1.19499	1.13516	1.47486	0.854028	0.934762	0.995764	0.917462	0.89043	0.894568	endoplasmic reticulum							PF01085	PF01085 Hedgehog amino-terminal signalling domain
CGIg28137	Q503Y4 OVCA2_DANRE Esterase OVCA2 OS=Danio rerio OX=7955 GN=ovca2 PE=2 SV=1	ovca2	0.658312	0.00619686	0.808762	0.010292	1.38636	0.0170126	0.886164	0.0844604	Up	25.3709	18.3	3	3	5245.77	6523.57	6674.66	9066.13	9776.53	9174.45	9117.13	8276.57	8176.28	7397.94	7112.17	8149.08	0.576633	0.717093	0.733701	0.99658	1.07467	1.00849	1.00219	0.909789	0.898765	0.813207	0.781794	0.895775	cytoplasm,nucleus				GO:0001101 response to acid chemical; GO:0010033 response to organic substance; GO:0032526 response to retinoic acid; GO:0033993 response to lipid; GO:0042221 response to chemical; GO:0050896 response to stimulus; GO:1901700 response to oxygen-containing compound;	GO:0005622 intracellular anatomical structure; GO:0005634 nucleus; GO:0005737 cytoplasm; GO:0043226 organelle; GO:0043227 membrane-bounded organelle; GO:0043229 intracellular organelle; GO:0043231 intracellular membrane-bounded organelle;	GO:0003824 catalytic activity; GO:0016787 hydrolase activity;	PF03959	PF03959 Serine hydrolase (FSH1)	E
CGIg15217	XP_034325909.1 sacsin isoform X1 [Crassostrea gigas]	--	0.548685	0.00619227	0.407929	0.000148442	0.800109	0.327268	0.929209	0.859236	Up	75.7369	1.7	1	1	3916.55	2792.69	3026.3	6247.95	5297.94	6197.53	2999.86	3105.63	1684	2391.55	2565.76	2280.75	1.32237	0.942915	1.02179	2.10954	1.78878	2.09252	1.01286	1.04857	0.568581	0.807477	0.866295	0.770066	cytoplasm	K17592	SACS; sacsin		GO:0006457 protein folding; GO:0009987 cellular process; GO:0044087 regulation of cellular component biogenesis; GO:0048519 negative regulation of biological process; GO:0048523 negative regulation of cellular process; GO:0050789 regulation of biological process; GO:0050794 regulation of cellular process; GO:0051128 regulation of cellular component organization; GO:0051129 negative regulation of …	GO:0005622 intracellular anatomical structure; GO:0005634 nucleus; GO:0005737 cytoplasm; GO:0005739 mitochondrion; GO:0030424 axon; GO:0030425 dendrite; GO:0036477 somatodendritic compartment; GO:0042995 cell projection; GO:0043005 neuron projection; GO:0043226 organelle; GO:0043227 membrane-bounded organelle; GO:0043229 intracellular organelle; GO:0043231 intracellular membrane-bounded organelle…	GO:0005102 signaling receptor binding; GO:0005488 binding; GO:0005515 protein binding; GO:0030544 Hsp70 protein binding; GO:0031072 heat shock protein binding; GO:0044877 protein-containing complex binding; GO:0050750 low-density lipoprotein particle receptor binding; GO:0051087 protein-folding chaperone binding; GO:0070325 lipoprotein particle receptor binding; GO:0070628 proteasome binding;
CGIg10726	Q9CQL4 RM20_MOUSE 39S ribosomal protein L20, mitochondrial OS=Mus musculus OX=10090 GN=Mrpl20 PE=1 SV=1	Mrpl20	0.34606	0.00607405	0.695326	0.00310695	1.82905	0.0704636	1.09853	0.512057	Up	21.4543	5.6	1	1	1993.98	991.872	1594.7	4618.45	4402.05	4215.77	2079.52	3471.28	2827.25	2783.51	3106.41	3313.61	0.56303	0.28007	0.450289	1.30409	1.24299	1.19039	0.587185	0.980169	0.798318	0.785967	0.877144	0.935649	mitochondria	K02887	RP-L20, MRPL20, rplT; large subunit ribosomal protein L20	map03010 Ribosome						J
CGIg04897	G3X987 GIMA9_MOUSE GTPase IMAP family member 9 OS=Mus musculus OX=10090 GN=Gimap9 PE=1 SV=1	Gimap9	0.624671	0.00603802	0.650041	0.00187222	1.71984	0.0316178	0.605066	0.031154	Up	76.1911	13.3	7	7	14407	11392.1	12625.4	18530.7	20388.9	22592	24821.5	16070.6	25191.6	13547	13435.8	13002.2	0.713615	0.564278	0.625364	0.917871	1.00991	1.11903	1.22947	0.796017	1.2478	0.671017	0.665505	0.644032	plasma membrane					GO:0005622 intracellular anatomical structure; GO:0005737 cytoplasm; GO:0005829 cytosol;		PF04548	PF04548 AIG1 family
CGIg14550	XP_011429948.1 uncharacterized protein LOC105330071 [Crassostrea gigas]	--	0.478413	0.00580644	0.525632	0.00153349	1.546	0.0971855	0.710673	0.121785	Up	53.8648	4.1	2	2	4277.84	3096.67	2812.11	6678.85	7951.45	6662.22	3777.26	6082.07	5889.18	3483.4	3521.17	4187.46	0.89677	0.64916	0.589507	1.4001	1.66687	1.39661	0.791833	1.27499	1.23456	0.73023	0.738149	0.877824	endoplasmic reticulum,Golgi apparatus
CGIg14031	XP_034305316.1 uncharacterized protein LOC117682231 isoform X2 [Crassostrea gigas]	--	0.494303	0.00572711	0.752306	0.00194478	1.41548	0.142725	1.07522	0.555015	Up	29.6121	4.2	1	1	5730.25	7443.6	9015.49	14219.1	15340.5	15330.6	8111.41	13042.2	10255	11764.7	10616.3	11390.1	0.46986	0.610349	0.739238	1.16591	1.25787	1.25705	0.665107	1.06942	0.840872	0.964666	0.870501	0.933944	plasma membrane
CGIg10571	P34378 RM18_CAEEL 39S ribosomal protein L18, mitochondrial OS=Caenorhabditis elegans OX=6239 GN=mrpl-18 PE=3 SV=1	mrpl-18	0.590708	0.00567988	0.487746	0.002527	1.14907	0.39646	0.718575	0.0935582	Up	24.2225	14.6	3	3	6943.21	8067.33	5762.26	11294	11999.9	11872.1	6554.6	7831.74	9483.15	5796.13	4649	6706.89	0.755202	0.877471	0.626751	1.22843	1.3052	1.29131	0.712934	0.851845	1.03147	0.630436	0.505664	0.729498	mitochondria	K02881	RP-L18, MRPL18, rplR; large subunit ribosomal protein L18	map03010 Ribosome	GO:0006403 RNA localization; GO:0006810 transport; GO:0006839 mitochondrial transport; GO:0015931 nucleobase-containing compound transport; GO:0033036 macromolecule localization; GO:0035927 RNA import into mitochondrion; GO:0035928 rRNA import into mitochondrion; GO:0050657 nucleic acid transport; GO:0050658 RNA transport; GO:0051029 rRNA transport; GO:0051179 localization; GO:0051234 establishme…	GO:0000313 organellar ribosome; GO:0000315 organellar large ribosomal subunit; GO:0005622 intracellular anatomical structure; GO:0005737 cytoplasm; GO:0005739 mitochondrion; GO:0005759 mitochondrial matrix; GO:0005761 mitochondrial ribosome; GO:0005762 mitochondrial large ribosomal subunit; GO:0005840 ribosome; GO:0015934 large ribosomal subunit; GO:0031974 membrane-enclosed lumen; GO:0032991 pro…	GO:0003676 nucleic acid binding; GO:0003723 RNA binding; GO:0005488 binding; GO:0008097 5S rRNA binding; GO:0019843 rRNA binding; GO:0097159 organic cyclic compound binding; GO:1901363 heterocyclic compound binding;			J
CGIg11302	XP_011450892.2 uncharacterized protein LOC105344726 isoform X2 [Crassostrea gigas]	--	0.393382	0.00561009	0.383634	0.0405812	1.97291	0	0.494305	0	Up	41.8589	3.6	1	1	281.902	182.695	293.03	536.222	680.623	709.086		498.244		345.016	113.202	280.634	1.01816	0.659845	1.05835	1.93669	2.45823	2.56103		1.79953		1.24611	0.408858	1.01358	plasma membrane
CGIg03897	XP_011450744.1 uncharacterized protein LOC105344625 [Crassostrea gigas]	--	0.666183	0.00555766	0.949121	0.568165	1.09909	0.151784	1.29627	0.0107871	Up	38.4262	7	2	2	7187.12	7259.87	7717.11	9779.75	11007	12483.6	7896.15	8882.48	7581.61	10240.2	10108.7	11228.7	0.583263	0.589167	0.626274	0.793665	0.893258	1.01309	0.640803	0.720848	0.615278	0.831032	0.820359	0.91125	cytoplasm						GO:0005488 binding; GO:0008270 zinc ion binding; GO:0043167 ion binding; GO:0043169 cation binding; GO:0046872 metal ion binding; GO:0046914 transition metal ion binding;
CGIg00786	E7FAM5 LIN41_DANRE E3 ubiquitin-protein ligase TRIM71 OS=Danio rerio OX=7955 GN=trim71 PE=1 SV=1	trim71	0.591309	0.00555123	0.932781	0.441566	1.40764	0.0321251	1.12066	0.297443	Up	36.2182	12	4	3	1584.33	1574.09	2033.36	3189.72	2897.97	2692.46	2170.17	2412.61	2725.39	2737.39	3047.26	2405.31	0.509012	0.505724	0.653277	1.02479	0.931058	0.865032	0.69723	0.77512	0.875611	0.879468	0.979021	0.772775	cytoplasm,nucleus	K12021	TRIM45; tripartite motif-containing protein 45		GO:0000244 spliceosomal tri-snRNP complex assembly; GO:0000375 RNA splicing, via transesterification reactions; GO:0000377 RNA splicing, via transesterification reactions with bulged adenosine as nucleophile; GO:0000387 spliceosomal snRNP assembly; GO:0000398 mRNA splicing, via spliceosome; GO:0006139 nucleobase-containing compound metabolic process; GO:0006325 chromatin organization; GO:0006355 …	GO:0000323 lytic vacuole; GO:0005622 intracellular anatomical structure; GO:0005634 nucleus; GO:0005737 cytoplasm; GO:0005764 lysosome; GO:0005773 vacuole; GO:0005829 cytosol; GO:0005886 plasma membrane; GO:0016020 membrane; GO:0043226 organelle; GO:0043227 membrane-bounded organelle; GO:0043229 intracellular organelle; GO:0043231 intracellular membrane-bounded organelle; GO:0071944 cell peripher…	GO:0001664 G protein-coupled receptor binding; GO:0003824 catalytic activity; GO:0004175 endopeptidase activity; GO:0004197 cysteine-type endopeptidase activity; GO:0004843 cysteine-type deubiquitinase activity; GO:0005102 signaling receptor binding; GO:0005126 cytokine receptor binding; GO:0005160 transforming growth factor beta receptor binding; GO:0005488 binding; GO:0005515 protein binding; G…	PF00643	PF00643 B-box zinc finger	O
CGIg24025	Q9UGM3 DMBT1_HUMAN Deleted in malignant brain tumors 1 protein OS=Homo sapiens OX=9606 GN=DMBT1 PE=1 SV=2	DMBT1	0.368908	0.00554755	0.767202	0.242384	2.52767	0.000260098	0.822757	0.0393666	Up	265.493	0.9	1	1	40791.7	37872.1	33929.2	109108	71007.2	125091	92734.7	87123	104740	77291.7	73789.9	83073.4	0.388267	0.360477	0.322948	1.03853	0.675867	1.19065	0.882675	0.829261	0.996949	0.735684	0.702353	0.790716	cytoplasm	K13912	DMBT1; deleted in malignant brain tumors 1 protein	map04970 Salivary secretion	GO:0002218 activation of innate immune response; GO:0002221 pattern recognition receptor signaling pathway; GO:0002253 activation of immune response; GO:0002376 immune system process; GO:0002682 regulation of immune system process; GO:0002684 positive regulation of immune system process; GO:0002757 immune response-activating signaling pathway; GO:0002758 innate immune response-activating signalin…	GO:0005576 extracellular region; GO:0005622 intracellular anatomical structure; GO:0005737 cytoplasm; GO:0012505 endomembrane system; GO:0012506 vesicle membrane; GO:0016020 membrane; GO:0019898 extrinsic component of membrane; GO:0030139 endocytic vesicle; GO:0030141 secretory granule; GO:0030659 cytoplasmic vesicle membrane; GO:0030666 endocytic vesicle membrane; GO:0030667 secretory granule me…	GO:0001530 lipopolysaccharide binding; GO:0003676 nucleic acid binding; GO:0003677 DNA binding; GO:0005044 scavenger receptor activity; GO:0005488 binding; GO:0005515 protein binding; GO:0005539 glycosaminoglycan binding; GO:0008289 lipid binding; GO:0019899 enzyme binding; GO:0035375 zymogen binding; GO:0038023 signaling receptor activity; GO:0038024 cargo receptor activity; GO:0038187 pattern r…	PF00530; PF00629	PF00530 Scavenger receptor cysteine-rich domain; PF00629 MAM domain, meprin/A5/mu
CGIg19971	Q5ZI11 LRC45_CHICK Leucine-rich repeat-containing protein 45 OS=Gallus gallus OX=9031 GN=LRRC45 PE=2 SV=1	LRRC45	0.663993	0.00548798	0.664309	0.0052025	1.09105	0.423009	0.916989	0.422209	Up	77.6975	10.8	7	7	4642.18	4527.87	5745.49	7398.52	7621.92	7442.97	5281.98	4890.96	6100.6	4684.22	5729.56	4508.87	0.65624	0.64008	0.812209	1.04589	1.07747	1.05217	0.746684	0.691408	0.862408	0.662183	0.809956	0.637394	cytoplasm,nucleus	K25401	LRRC45; leucine-rich repeat-containing protein 45			GO:0005622 intracellular anatomical structure; GO:0005634 nucleus; GO:0005654 nucleoplasm; GO:0005737 cytoplasm; GO:0005813 centrosome; GO:0005815 microtubule organizing center; GO:0005829 cytosol; GO:0005856 cytoskeleton; GO:0005886 plasma membrane; GO:0015630 microtubule cytoskeleton; GO:0016020 membrane; GO:0031974 membrane-enclosed lumen; GO:0031981 nuclear lumen; GO:0043226 organelle; GO:004…				S
CGIg15431	XP_011426522.2 uncharacterized protein LOC105327633 [Crassostrea gigas]	--	0.551367	0.00546718	0.619919	0.0189155	1.44324	0.00359507	0.779031	0.0426608	Up	32.5843	3.5	1	1	3676.47	4282.7	3851.68	6628.03	8567.28	6225.7	5665.93	5301.91	6078.05	4645.64	3780.18	4853.46	0.623507	0.726319	0.653221	1.12407	1.45296	1.05584	0.960906	0.89917	1.0308	0.787871	0.641096	0.823117	cytoplasm	K04401	CASP14; caspase 14 [EC:3.4.22.-]					PF00656	PF00656 Caspase domain
CGIg01434	G4VJD6 DYR_SCHMA Dihydrofolate reductase OS=Schistosoma mansoni OX=6183 GN=DHFR PE=1 SV=1	DHFR	0.650687	0.00545678	1.11907	0.330343	1.62975	0.00981685	1.05528	0.689517	Up	25.7319	8.7	2	2	3680.48	3437.57	4446.46	5699.52	5956.8	6116.45	6916.32	6499.51	5431.4	5871.31	6132.78	7884.97	0.635103	0.593187	0.767282	0.98351	1.02791	1.05546	1.19348	1.12156	0.937243	1.01315	1.05827	1.36063	mitochondria	K00287	DHFR, folA; dihydrofolate reductase [EC:1.5.1.3]	map00670 One carbon pool by folate; map00790 Folate biosynthesis; map01100 Metabolic pathways; map01240 Biosynthesis of cofactors	GO:0000082 G1/S transition of mitotic cell cycle; GO:0000278 mitotic cell cycle; GO:0001101 response to acid chemical; GO:0006066 alcohol metabolic process; GO:0006082 organic acid metabolic process; GO:0006139 nucleobase-containing compound metabolic process; GO:0006213 pyrimidine nucleoside metabolic process; GO:0006355 regulation of DNA-templated transcription; GO:0006417 regulation of transla…	GO:0005622 intracellular anatomical structure; GO:0005737 cytoplasm; GO:0005739 mitochondrion; GO:0005740 mitochondrial envelope; GO:0005743 mitochondrial inner membrane; GO:0005759 mitochondrial matrix; GO:0005829 cytosol; GO:0016020 membrane; GO:0019866 organelle inner membrane; GO:0031090 organelle membrane; GO:0031966 mitochondrial membrane; GO:0031967 organelle envelope; GO:0031974 membrane-…	GO:0000166 nucleotide binding; GO:0000900 mRNA regulatory element binding translation repressor activity; GO:0003676 nucleic acid binding; GO:0003723 RNA binding; GO:0003729 mRNA binding; GO:0003824 catalytic activity; GO:0004146 dihydrofolate reductase activity; GO:0005488 binding; GO:0005515 protein binding; GO:0005542 folic acid binding; GO:0016491 oxidoreductase activity; GO:0016645 oxidoredu…	PF00186	PF00186 Dihydrofolate reductase	H
CGIg14751	ADW66456.1 sialic acid binding lectin [Crassostrea hongkongensis]	--	0.508506	0.0053363	1.29478	0.00537678	1.28675	0.133165	1.97883	0.000813253	Up	17.493	21.3	2	2	1.0741e+06	721457	840381	1.84437e+06	1.7643e+06	1.57501e+06	1.26112e+06	975326	1.15534e+06	2266520	2.22823e+06	2.21699e+06	0.337054	0.226395	0.263713	0.578767	0.553643	0.494243	0.395741	0.306059	0.362548	0.711239	0.699225	0.695696	extracellular	K23284	C1QL; C1q-related factor					PF00386	PF00386 C1q domain
CGIg16623	P04464 CALM_WHEAT Calmodulin OS=Triticum aestivum OX=4565 PE=1 SV=3	--	0.629454	0.00525702	0.541786	0.00781063	0.927609	0.539823	0.927896	0.624299	Up	17.7906	6.4	1	1	51152.3	46533.1	59102.4	89471.5	83700.8	75913.1	50815.2	39875.3	54747.1	56037.8	39060.1	39853.2	0.757549	0.689141	0.875288	1.32504	1.23958	1.12425	0.752558	0.590541	0.810788	0.829902	0.578467	0.590214	cytoplasm	K02183	CALM; calmodulin	map04014 Ras signaling pathway; map04015 Rap1 signaling pathway; map04020 Calcium signaling pathway; map04022 cGMP-PKG signaling pathway; map04024 cAMP signaling pathway; map04070 Phosphatidylinositol signaling system; map04114 Oocyte meiosis; map04218 Cellular senescence; map04261 Adrenergic signaling in cardiomyocytes; map04270 Vascular smooth muscle contraction; map04371 Apelin signaling pathw…				PF13499	PF13499 EF-hand domain pair	T
CGIg28157	Q5F3J5 PSME3_CHICK Proteasome activator complex subunit 3 OS=Gallus gallus OX=9031 GN=PSME3 PE=1 SV=1	PSME3	0.374756	0.00525611	0.515747	0.00623317	2.51327	0.0255575	0.54758	0.0329626	Up	29.1516	3.1	1	1	5783.59		6864.13	20008.4	15713.3	14902.1	11298.1	19111.7	17270.9	8829.96	9919.6	7359.49	0.455895		0.541069	1.57717	1.23861	1.17466	0.890581	1.50649	1.36139	0.696026	0.781917	0.580116	nucleus	K06698	PSME3; proteasome activator subunit 3 (PA28 gamma)	map03050 Proteasome; map04612 Antigen processing and presentation	GO:0000375 RNA splicing, via transesterification reactions; GO:0000377 RNA splicing, via transesterification reactions with bulged adenosine as nucleophile; GO:0000398 mRNA splicing, via spliceosome; GO:0006139 nucleobase-containing compound metabolic process; GO:0006396 RNA processing; GO:0006397 mRNA processing; GO:0006508 proteolysis; GO:0006725 cellular aromatic compound metabolic process; GO…	GO:0000502 proteasome complex; GO:0005622 intracellular anatomical structure; GO:0005634 nucleus; GO:0005654 nucleoplasm; GO:0005694 chromosome; GO:0005700 polytene chromosome; GO:0005703 polytene chromosome puff; GO:0005705 polytene chromosome interband; GO:0005737 cytoplasm; GO:0005829 cytosol; GO:0031974 membrane-enclosed lumen; GO:0031981 nuclear lumen; GO:0032991 protein-containing complex; …	GO:0002039 p53 binding; GO:0004857 enzyme inhibitor activity; GO:0004866 endopeptidase inhibitor activity; GO:0005488 binding; GO:0005515 protein binding; GO:0008047 enzyme activator activity; GO:0016504 peptidase activator activity; GO:0030234 enzyme regulator activity; GO:0030414 peptidase inhibitor activity; GO:0042802 identical protein binding; GO:0061133 endopeptidase activator activity; GO:…			O
CGIg16495	Q9NZJ4 SACS_HUMAN Sacsin OS=Homo sapiens OX=9606 GN=SACS PE=1 SV=2	SACS	0.634314	0.00503827	0.63644	0.00377591	1.21447	0.0139113	0.826165	0.00463115	Up	164.215	2.2	3	3	12338.9	11568.9	13225.3	21901.9	17126.9	19512	15274.6	15552	14270.6	12785.8	12542.5	11929.4	1.01958	0.955959	1.09283	1.80978	1.41522	1.6123	1.26216	1.28508	1.1792	1.05651	1.03641	0.98574	cytoplasm	K17592	SACS; sacsin		GO:0006457 protein folding; GO:0009987 cellular process; GO:0044087 regulation of cellular component biogenesis; GO:0048519 negative regulation of biological process; GO:0048523 negative regulation of cellular process; GO:0050789 regulation of biological process; GO:0050794 regulation of cellular process; GO:0051128 regulation of cellular component organization; GO:0051129 negative regulation of …	GO:0005622 intracellular anatomical structure; GO:0005634 nucleus; GO:0005737 cytoplasm; GO:0005739 mitochondrion; GO:0030424 axon; GO:0030425 dendrite; GO:0036477 somatodendritic compartment; GO:0042995 cell projection; GO:0043005 neuron projection; GO:0043226 organelle; GO:0043227 membrane-bounded organelle; GO:0043229 intracellular organelle; GO:0043231 intracellular membrane-bounded organelle…	GO:0005102 signaling receptor binding; GO:0005488 binding; GO:0005515 protein binding; GO:0030544 Hsp70 protein binding; GO:0031072 heat shock protein binding; GO:0044877 protein-containing complex binding; GO:0050750 low-density lipoprotein particle receptor binding; GO:0051087 protein-folding chaperone binding; GO:0070325 lipoprotein particle receptor binding; GO:0070628 proteasome binding;
CGIg09736	P41044 CAB32_DROME Calbindin-32 OS=Drosophila melanogaster OX=7227 GN=Cbp53E PE=2 SV=1	Cbp53E	0.541471	0.00498897	0.714956	0.00848592	0.67913	0.033003	1.94425	0.00139409	Up	38.4252	6.9	3	3	18064.3	16146.5	13441.8	31660.6	30858.9	25486.3	10174.5	9545.09	12642.7	20935.2	20833.9	21151.2	0.582111	0.52031	0.433155	1.02024	0.994407	0.821281	0.327867	0.307585	0.407404	0.674625	0.671359	0.681584	cytoplasm	K23908	CALB2; calretinin		GO:0001654 eye development; GO:0001655 urogenital system development; GO:0001656 metanephros development; GO:0001657 ureteric bud development; GO:0001822 kidney development; GO:0001823 mesonephros development; GO:0003008 system process; GO:0003338 metanephros morphogenesis; GO:0003407 neural retina development; GO:0006629 lipid metabolic process; GO:0006766 vitamin metabolic process; GO:0006775 f…	GO:0005622 intracellular anatomical structure; GO:0005634 nucleus; GO:0005737 cytoplasm; GO:0005829 cytosol; GO:0005886 plasma membrane; GO:0005911 cell-cell junction; GO:0005921 gap junction; GO:0012506 vesicle membrane; GO:0016020 membrane; GO:0030054 cell junction; GO:0030424 axon; GO:0030425 dendrite; GO:0031090 organelle membrane; GO:0031982 vesicle; GO:0036477 somatodendritic compartment; G…	GO:0005488 binding; GO:0005509 calcium ion binding; GO:0008270 zinc ion binding; GO:0043167 ion binding; GO:0043169 cation binding; GO:0046872 metal ion binding; GO:0046914 transition metal ion binding; GO:0099510 calcium ion binding involved in regulation of cytosolic calcium ion concentration; GO:0099534 calcium ion binding involved in regulation of presynaptic cytosolic calcium ion concentrati…	PF13499; PF13202	PF13499 EF-hand domain pair; PF13202 EF hand	T
CGIg20773	P42325 NCAH_DROME Neurocalcin homolog OS=Drosophila melanogaster OX=7227 GN=Nca PE=1 SV=2	Nca	0.48579	0.00496453	0.733161	0.06944	1.34352	0.343809	1.12333	0.508922	Up	22.6824	14.4	3	3	8333.82	8958.15	10367	19476.3	22204.5	15255.3	9041.39	9845.88	18273.1	13376.3	15420	12947	0.429349	0.461514	0.534096	1.0034	1.14395	0.785937	0.465803	0.507249	0.94141	0.689132	0.79442	0.667015	cytoplasm	K23847	HPCAL1; hippocalcin-like protein 1		GO:0001101 response to acid chemical; GO:0001558 regulation of cell growth; GO:0001654 eye development; GO:0003008 system process; GO:0003013 circulatory system process; GO:0003073 regulation of systemic arterial blood pressure; GO:0006140 regulation of nucleotide metabolic process; GO:0006810 transport; GO:0006811 monoatomic ion transport; GO:0007154 cell communication; GO:0007165 signal transdu…	GO:0005622 intracellular anatomical structure; GO:0005737 cytoplasm; GO:0005794 Golgi apparatus; GO:0005798 Golgi-associated vesicle; GO:0005829 cytosol; GO:0005886 plasma membrane; GO:0012505 endomembrane system; GO:0012506 vesicle membrane; GO:0012510 trans-Golgi network transport vesicle membrane; GO:0016020 membrane; GO:0019898 extrinsic component of membrane; GO:0030117 membrane coat; GO:003…	GO:0003779 actin binding; GO:0005215 transporter activity; GO:0005216 monoatomic ion channel activity; GO:0005488 binding; GO:0005509 calcium ion binding; GO:0005515 protein binding; GO:0008092 cytoskeletal protein binding; GO:0015075 monoatomic ion transmembrane transporter activity; GO:0015267 channel activity; GO:0015276 ligand-gated monoatomic ion channel activity; GO:0015318 inorganic molecu…	PF00036; PF13499	PF00036 EF hand; PF13499 EF-hand domain pair	T
CGIg10377	Q5RFD6 CBPM_PONAB Carboxypeptidase M OS=Pongo abelii OX=9601 GN=CPM PE=2 SV=1	CPM	0.41509	0.0048776	0.921007	0.486619	0.998804	0.831714	2.22147	0.068156	Up	47.7804	6.9	3	3	2147.9	2827.55	1661.01	5677.48	5421.67	4888.85	1044.2	2236.91	3347.41	3965.33	5868.52	4891.21	0.429699	0.565666	0.332292	1.13581	1.08463	0.978038	0.208898	0.447504	0.669666	0.793284	1.17403	0.978511	endoplasmic reticulum	K07752	CPD; carboxypeptidase D [EC:3.4.17.22]		GO:0006508 proteolysis; GO:0006518 peptide metabolic process; GO:0006807 nitrogen compound metabolic process; GO:0008152 metabolic process; GO:0009653 anatomical structure morphogenesis; GO:0009987 cellular process; GO:0010467 gene expression; GO:0016485 protein processing; GO:0019538 protein metabolic process; GO:0032502 developmental process; GO:0034641 cellular nitrogen compound metabolic proc…	GO:0005576 extracellular region; GO:0005615 extracellular space; GO:0005886 plasma membrane; GO:0009986 cell surface; GO:0016020 membrane; GO:0071944 cell periphery;	GO:0003824 catalytic activity; GO:0004180 carboxypeptidase activity; GO:0004181 metallocarboxypeptidase activity; GO:0004185 serine-type carboxypeptidase activity; GO:0008233 peptidase activity; GO:0008235 metalloexopeptidase activity; GO:0008236 serine-type peptidase activity; GO:0008237 metallopeptidase activity; GO:0008238 exopeptidase activity; GO:0016787 hydrolase activity; GO:0017171 serine…	PF00246	PF00246 Zinc carboxypeptidase	R
CGIg24530	XP_034329579.1 uncharacterized protein LOC117690202 [Crassostrea gigas]	--	0.334485	0.00485861	0.851163	0.124373	2.00371	0.0256055	1.26999	0.090737	Up	79.674	7.4	5	2	2923.37	1575.34	2812.97	7498.49	7267.7	7093.32	5456.71	4381.08	4812.71	7139.06	5315.22	6151.73	0.502572	0.270825	0.483592	1.28911	1.24943	1.21945	0.938092	0.753175	0.827379	1.22731	0.913768	1.05758	nucleus	K12021	TRIM45; tripartite motif-containing protein 45					PF13445; PF00643	PF13445 RING-type zinc-finger; PF00643 B-box zinc finger	O
CGIg13480	Q9BTY2 FUCO2_HUMAN Plasma alpha-L-fucosidase OS=Homo sapiens OX=9606 GN=FUCA2 PE=1 SV=2	FUCA2	0.537241	0.00479139	0.562569	0.0109301	2.20565	0.00127032	0.474755	0.00327616	Up	53.2266	2.2	1	1	2256.02	3053.56	2422.41	4316.95	5349.52	4725.55	6103.69	5393.19	5557.19	2389.36	3347.77	2359.37	0.527435	0.713892	0.566334	1.00926	1.25066	1.10479	1.42698	1.26087	1.29921	0.558609	0.782675	0.551598	endoplasmic reticulum	K01206	FUCA; alpha-L-fucosidase [EC:3.2.1.51]	map00511 Other glycan degradation; map04142 Lysosome	GO:0000003 reproduction; GO:0001775 cell activation; GO:0002252 immune effector process; GO:0002263 cell activation involved in immune response; GO:0002274 myeloid leukocyte activation; GO:0002275 myeloid cell activation involved in immune response; GO:0002283 neutrophil activation involved in immune response; GO:0002366 leukocyte activation involved in immune response; GO:0002376 immune system p…	GO:0000323 lytic vacuole; GO:0001669 acrosomal vesicle; GO:0002080 acrosomal membrane; GO:0002081 outer acrosomal membrane; GO:0005576 extracellular region; GO:0005615 extracellular space; GO:0005622 intracellular anatomical structure; GO:0005737 cytoplasm; GO:0005764 lysosome; GO:0005766 primary lysosome; GO:0005773 vacuole; GO:0005775 vacuolar lumen; GO:0005783 endoplasmic reticulum; GO:0005788…	GO:0003824 catalytic activity; GO:0004553 hydrolase activity, hydrolyzing O-glycosyl compounds; GO:0004560 alpha-L-fucosidase activity; GO:0005488 binding; GO:0015928 fucosidase activity; GO:0016787 hydrolase activity; GO:0016798 hydrolase activity, acting on glycosyl bonds; GO:0030246 carbohydrate binding; GO:0036094 small molecule binding; GO:0042806 fucose binding; GO:0048029 monosaccharide bi…	PF01120; PF16757	PF01120 Alpha-L-fucosidase; PF16757 Alpha-L-fucosidase C-terminal domain	G
CGIg27909	O16025 AOSL_PLEHO Allene oxide synthase-lipoxygenase protein OS=Plexaura homomalla OX=47982 PE=1 SV=1	--	0.147016	0.00470235	0.694931	0.160536	4.84794	0.000169326	0.975033	0.688903	Up	75.3963	3.8	2	2	9739.56	9716.35		74049.3	43732.7	80725.6	43439.8	46176.9	51864.8	46636.1	45491	45821.9	0.23864	0.238071		1.81436	1.07154	1.97795	1.06437	1.13143	1.2708	1.14268	1.11463	1.12273	cytoplasm	K00461	ALOX5; arachidonate 5-lipoxygenase [EC:1.13.11.34]	map00590 Arachidonic acid metabolism; map01100 Metabolic pathways; map04664 Fc epsilon RI signaling pathway; map04726 Serotonergic synapse; map04913 Ovarian steroidogenesis	GO:0001676 long-chain fatty acid metabolic process; GO:0001775 cell activation; GO:0002252 immune effector process; GO:0002263 cell activation involved in immune response; GO:0002274 myeloid leukocyte activation; GO:0002275 myeloid cell activation involved in immune response; GO:0002283 neutrophil activation involved in immune response; GO:0002366 leukocyte activation involved in immune response;…	GO:0005576 extracellular region; GO:0005622 intracellular anatomical structure; GO:0005634 nucleus; GO:0005635 nuclear envelope; GO:0005641 nuclear envelope lumen; GO:0005654 nucleoplasm; GO:0005737 cytoplasm; GO:0005829 cytosol; GO:0005886 plasma membrane; GO:0012505 endomembrane system; GO:0016020 membrane; GO:0016363 nuclear matrix; GO:0030141 secretory granule; GO:0030425 dendrite; GO:0031090…	GO:0003824 catalytic activity; GO:0004051 arachidonate 5-lipoxygenase activity; GO:0005488 binding; GO:0005506 iron ion binding; GO:0016491 oxidoreductase activity; GO:0016701 oxidoreductase activity, acting on single donors with incorporation of molecular oxygen; GO:0016702 oxidoreductase activity, acting on single donors with incorporation of molecular oxygen, incorporation of two atoms of oxyg…	PF01477; PF00305	PF01477 PLAT/LH2 domain; PF00305 Lipoxygenase
CGIg18453	O88572 LRP6_MOUSE Low-density lipoprotein receptor-related protein 6 OS=Mus musculus OX=10090 GN=Lrp6 PE=1 SV=1	Lrp6	0.543281	0.0046219	0.462869	0.0372924	1.13536	0.595297	0.750416	0.358023	Up	54.1572	1.7	1	1	3368.44	2422.91	2666.76	4762.93	5575.35	5230.3	2325.95	3172.43	4104.59	2686.75	3189.49	1329.98	0.978313	0.703697	0.774519	1.38332	1.61928	1.51906	0.675536	0.921386	1.19212	0.780325	0.92634	0.386273	extracellular	K20051	LRP4, MEGF7; low-density lipoprotein receptor-related protein 4		GO:0001523 retinoid metabolic process; GO:0001568 blood vessel development; GO:0001701 in utero embryonic development; GO:0001775 cell activation; GO:0001944 vasculature development; GO:0002252 immune effector process; GO:0002263 cell activation involved in immune response; GO:0002265 astrocyte activation involved in immune response; GO:0002376 immune system process; GO:0003205 cardiac chamber de…	GO:0005622 intracellular anatomical structure; GO:0005634 nucleus; GO:0005737 cytoplasm; GO:0005768 endosome; GO:0005769 early endosome; GO:0005886 plasma membrane; GO:0005905 clathrin-coated pit; GO:0012505 endomembrane system; GO:0012506 vesicle membrane; GO:0016020 membrane; GO:0016323 basolateral plasma membrane; GO:0030135 coated vesicle; GO:0030136 clathrin-coated vesicle; GO:0030139 endocy…	GO:0002020 protease binding; GO:0005041 low-density lipoprotein particle receptor activity; GO:0005044 scavenger receptor activity; GO:0005102 signaling receptor binding; GO:0005215 transporter activity; GO:0005488 binding; GO:0005509 calcium ion binding; GO:0005515 protein binding; GO:0016964 alpha-2 macroglobulin receptor activity; GO:0019899 enzyme binding; GO:0030226 apolipoprotein receptor a…			T
CGIg20853	O97125 HSP68_DROME Heat shock protein 68 OS=Drosophila melanogaster OX=7227 GN=Hsp68 PE=1 SV=1	Hsp68	0.194951	0.00460702	0.266632	9.18621e-06	0.646053	0.358842	2.11699	0.0546723	Up	69.7626	24.9	14	0	4.15012e+06	4.00582e+06	1.66481e+06	17403644	16384912	16586823	3.00352e+06	1.0733e+06	2.2679e+06	4.34001e+06	4.86253e+06	4229144	0.253	0.244203	0.10149	1.06096	0.998858	1.01117	0.183101	0.0654304	0.138256	0.264576	0.29643	0.257817	cytoplasm	K03283	HSPA1s; heat shock 70kDa protein 1/2/6/8	map03040 Spliceosome; map04010 MAPK signaling pathway; map04141 Protein processing in endoplasmic reticulum; map04144 Endocytosis; map04213 Longevity regulating pathway - multiple species; map04612 Antigen processing and presentation; map04915 Estrogen signaling pathway	GO:0006457 protein folding; GO:0006950 response to stress; GO:0007275 multicellular organism development; GO:0008340 determination of adult lifespan; GO:0009605 response to external stimulus; GO:0009987 cellular process; GO:0009991 response to extracellular stimulus; GO:0031667 response to nutrient levels; GO:0032501 multicellular organismal process; GO:0032502 developmental process; GO:0042594 r…	GO:0005622 intracellular anatomical structure; GO:0005737 cytoplasm; GO:0005739 mitochondrion; GO:0043226 organelle; GO:0043227 membrane-bounded organelle; GO:0043229 intracellular organelle; GO:0043231 intracellular membrane-bounded organelle;	GO:0005488 binding; GO:0005515 protein binding; GO:0051082 unfolded protein binding;			O
CGIg11522	P86179 CSL3_ONCKE L-rhamnose-binding lectin CSL3 OS=Oncorhynchus keta OX=8018 PE=1 SV=1	--	0.597565	0.00459725	1.1206	0.206023	1.12288	0.897699	1.67006	0.118763	Up	25.638	13.9	3	3	35536.8	35844.6	42539.4	55233.1	67301.2	68107.5	21991.9	57059.9	48868	71951.9	66311.5	75370.8	0.577185	0.582186	0.690922	0.897092	1.0931	1.1062	0.357191	0.926763	0.793711	1.16864	1.07703	1.22417	extracellular							PF02140	PF02140 Galactose binding lectin domain	R
CGIg00336	P04569 SCP1_BRALA Sarcoplasmic calcium-binding proteins I, III, and IV OS=Branchiostoma lanceolatum OX=7740 PE=1 SV=2	--	0.606094	0.00444823	0.817172	0.0392977	0.564247	0.0182799	2.38948	0.00325254	Up	30.2334	3.1	1	1	7031.53	6564.84	8608.66	11588.4	12092.3	12955.5	4902.02	4414.64	3212.45	10234.8	8870.85	10832.5	0.741548	0.692331	0.907872	1.22212	1.27526	1.36629	0.516968	0.46557	0.338787	1.07936	0.935524	1.1424	nucleus						GO:0003824 catalytic activity; GO:0003924 GTPase activity; GO:0016462 pyrophosphatase activity; GO:0016787 hydrolase activity; GO:0016817 hydrolase activity, acting on acid anhydrides; GO:0016818 hydrolase activity, acting on acid anhydrides, in phosphorus-containing anhydrides; GO:0017111 ribonucleoside triphosphate phosphatase activity;	PF13202; PF13405	PF13202 EF hand; PF13405 EF-hand domain
CGIg11840	XP_034336188.1 uncharacterized protein LOC105343319 isoform X1 [Crassostrea gigas]	--	0.657691	0.00433055	1.79549	0.000245227	1.7798	0.000883141	1.53387	0.000278987	Up	53.5446	7.4	4	4	14626.9	13640.9	16455.1	20900.7	24585.2	22514	25753.3	25428.9	28415.8	41029.4	40949.7	40114.2	0.471835	0.440029	0.530808	0.674216	0.79307	0.726256	0.83075	0.820285	0.916639	1.32353	1.32096	1.294	extracellular							PF18738	PF18738 DZIP3/ hRUL138-like HEPN
CGIg08205	XP_034303858.1 uncharacterized protein LOC105349068 [Crassostrea gigas]	--	0.659943	0.00426397	0.886244	0.315686	1.21789	0.256851	1.10266	0.492309	Up	30.9785	3.2	1	1	8895.29	8726.44	8656.77	13472.1	11604.7	14742.6	9778.15		11558	10033.7	12045.5	13210.4	0.596154	0.584838	0.580169	0.902886	0.777734	0.988034	0.655323		0.774606	0.672451	0.80728	0.88535	extracellular
CGIg13323	A7Y2X0 SC6A5_XENLA Sodium- and chloride-dependent glycine transporter 2 OS=Xenopus laevis OX=8355 GN=slc6a5 PE=2 SV=1	slc6a5	0.645504	0.00425907	0.702493	0.0231897	1.29035	0.0699503	0.843402	0.203901	Up	92.9403	1.1	1	1	1544.32		1426.97	2417.53	2141.57	2345.48	1743.05	2173.05	1834.92	1559.24	1908.35	1382.83	0.665387		0.614829	1.04162	0.922721	1.01058	0.751014	0.936286	0.790595	0.671819	0.822236	0.595808	plasma membrane	K05038	SLC6A5_9, GLYT; solute carrier family 6 (neurotransmitter transporter, glycine) member 5/9	map04721 Synaptic vesicle cycle						T
CGIg05933	XP_022326560.1 uncharacterized protein LOC111126315 [Crassostrea virginica]	--	0.624044	0.00420742	0.887678	0.112598	2.97176	5.80402e-05	0.47866	6.4698e-06	Up	27.0903	17.6	4	4	42180.9	43445.8	36212.6	58481.4	65530.3	71229.8	118361	126441	117274	57954.1	57750.4	57607.2	0.206923	0.213128	0.177644	0.286887	0.321465	0.349425	0.580634	0.620271	0.575299	0.2843	0.2833	0.282598	nucleus
CGIg03174	XP_034331344.1 uncharacterized protein LOC117690777 [Crassostrea gigas]	--	0.302834	0.00418677	0.343117	0.00795053	2.80267	0.00635976	0.404264	0.120212	Up	26.7078	4.7	1	1	1309.27	2404.04	1338.31	5273.32	5102.17	6305.63	4327.81	5084.39	4745.79	1532.18		2283.53	0.40007	0.734597	0.408946	1.61136	1.55906	1.9268	1.32244	1.55363	1.45016	0.468187		0.697774	plasma membrane
CGIg09289	XP_019928460.2 uncharacterized protein LOC109620434 [Crassostrea gigas]	--	0.496472	0.00414623	0.817605	0.201087	1.72154	0.00439486	0.956602	0.729891	Up	74.0605	1.4	1	1	7345.3	7314.34	7246.7	13766.2	12234.7	18123.2	14883.3	11900.2	10929.2	13036.1	11328.6	11711.4	0.563422	0.561047	0.555859	1.05594	0.938461	1.39014	1.14163	0.912806	0.838326	0.999937	0.868959	0.898323	nucleus
CGIg27114	Q9DBL7 COASY_MOUSE Bifunctional coenzyme A synthase OS=Mus musculus OX=10090 GN=Coasy PE=1 SV=2	Coasy	0.314101	0.00410399	0.74262	0.00726717	2.61026	0.00826631	0.905759	0.210129	Up	53.4864	2.5	1	1	6652.53	6130.04	3501.06	17709.9	16801.5	17330.5	14931	13229.8	14343.8	13287.3	11421.9	13789.7	0.578927	0.533458	0.304674	1.54118	1.46213	1.50816	1.29935	1.1513	1.24825	1.15631	0.993971	1.20003	mitochondria	K02318	COASY; phosphopantetheine adenylyltransferase / dephospho-CoA kinase [EC:2.7.7.3 2.7.1.24]	map00770 Pantothenate and CoA biosynthesis; map01100 Metabolic pathways; map01240 Biosynthesis of cofactors	GO:0000003 reproduction; GO:0001667 ameboidal-type cell migration; GO:0002009 morphogenesis of an epithelium; GO:0002064 epithelial cell development; GO:0002065 columnar/cuboidal epithelial cell differentiation; GO:0002066 columnar/cuboidal epithelial cell development; GO:0002165 instar larval or pupal development; GO:0003006 developmental process involved in reproduction; GO:0006139 nucleobase-c…	GO:0005622 intracellular anatomical structure; GO:0005634 nucleus; GO:0005654 nucleoplasm; GO:0005737 cytoplasm; GO:0005739 mitochondrion; GO:0005740 mitochondrial envelope; GO:0005741 mitochondrial outer membrane; GO:0005759 mitochondrial matrix; GO:0005829 cytosol; GO:0016020 membrane; GO:0019867 outer membrane; GO:0031090 organelle membrane; GO:0031966 mitochondrial membrane; GO:0031967 organe…	GO:0003824 catalytic activity; GO:0004140 dephospho-CoA kinase activity; GO:0004595 pantetheine-phosphate adenylyltransferase activity; GO:0016301 kinase activity; GO:0016740 transferase activity; GO:0016772 transferase activity, transferring phosphorus-containing groups; GO:0016773 phosphotransferase activity, alcohol group as acceptor; GO:0016779 nucleotidyltransferase activity; GO:0070566 aden…	PF01467; PF01121	PF01467 Cytidylyltransferase-like; PF01121 Dephospho-CoA kinase	R
CGIg22786	Q9NZC4 EHF_HUMAN ETS homologous factor OS=Homo sapiens OX=9606 GN=EHF PE=2 SV=1	EHF	0.44784	0.0040524	0.905173	0.330499	1.78345	0.0445932	1.13331	0.473917	Up	47.8342	2.4	1	1	908.979	1331.08	1412.59	2754.86	2738.15	2663.11	1968.03	2807.29	1739	2007.8	2737.24	2637.67	0.494943	0.724776	0.769159	1.50003	1.49094	1.45008	1.0716	1.52858	0.946892	1.09326	1.49044	1.43622	nucleus	K17102	EHF; ETS homologous factor		GO:0001701 in utero embryonic development; GO:0001824 blastocyst development; GO:0006139 nucleobase-containing compound metabolic process; GO:0006351 DNA-templated transcription; GO:0006355 regulation of DNA-templated transcription; GO:0006357 regulation of transcription by RNA polymerase II; GO:0006366 transcription by RNA polymerase II; GO:0006725 cellular aromatic compound metabolic process; G…	GO:0005622 intracellular anatomical structure; GO:0005634 nucleus; GO:0005654 nucleoplasm; GO:0005737 cytoplasm; GO:0005794 Golgi apparatus; GO:0005829 cytosol; GO:0012505 endomembrane system; GO:0031974 membrane-enclosed lumen; GO:0031981 nuclear lumen; GO:0043226 organelle; GO:0043227 membrane-bounded organelle; GO:0043229 intracellular organelle; GO:0043231 intracellular membrane-bounded organ…	GO:0000976 transcription cis-regulatory region binding; GO:0000977 RNA polymerase II transcription regulatory region sequence-specific DNA binding; GO:0000978 RNA polymerase II cis-regulatory region sequence-specific DNA binding; GO:0000981 DNA-binding transcription factor activity, RNA polymerase II-specific; GO:0000987 cis-regulatory region sequence-specific DNA binding; GO:0001067 transcriptio…	PF02198; PF00178	PF02198 Sterile alpha motif (SAM)/Pointed domain; PF00178 Ets-domain	K
CGIg16261	Q9Y6R9 CCD61_HUMAN Centrosomal protein CCDC61 OS=Homo sapiens OX=9606 GN=CCDC61 PE=1 SV=3	CCDC61	0.346287	0.00401299	0.66434	0.393369	0.851064	0.211037	2.2542	0.253837	Up	66.3833	1.7	1	1	2648.49	2128.79	2580.05	7996.02	6168.19		1825.64	2442.76	1993.16	3149.44	6260.41		0.59983	0.48213	0.584331	1.81094	1.39697		0.413471	0.553238	0.451412	0.713288	1.41786		nucleus	K16755	CCDC61; coiled-coil domain-containing protein 61			GO:0005622 intracellular anatomical structure; GO:0005813 centrosome; GO:0005815 microtubule organizing center; GO:0005856 cytoskeleton; GO:0015630 microtubule cytoskeleton; GO:0043226 organelle; GO:0043228 non-membrane-bounded organelle; GO:0043229 intracellular organelle; GO:0043232 intracellular non-membrane-bounded organelle;
CGIg12882	Q2QLE0 MET_PIG Hepatocyte growth factor receptor OS=Sus scrofa OX=9823 GN=MET PE=2 SV=1	MET	0.512041	0.00399779	0.522088	0.0607464	1.77767	0.0212535	0.573571	0.108698	Up	153.647	4.2	5	5	2407.76	2768.88	2116.88	4647.53	4129.68	5466.8	5244.79	4392.81	3327.87	2896.59	1391	3149.03	0.491148	0.564809	0.431811	0.948026	0.842393	1.11514	1.06986	0.896067	0.678836	0.590861	0.283742	0.642355	endoplasmic reticulum	K05099	MET, HGFR; proto-oncogene tyrosine-protein kinase Met [EC:2.7.10.1]	map04010 MAPK signaling pathway; map04014 Ras signaling pathway; map04015 Rap1 signaling pathway; map04020 Calcium signaling pathway; map04151 PI3K-Akt signaling pathway; map04360 Axon guidance; map04361 Axon regeneration; map04510 Focal adhesion; map04520 Adherens junction	GO:0000003 reproduction; GO:0000122 negative regulation of transcription by RNA polymerase II; GO:0000165 MAPK cascade; GO:0000902 cell morphogenesis; GO:0001678 intracellular glucose homeostasis; GO:0001763 morphogenesis of a branching structure; GO:0001764 neuron migration; GO:0001817 regulation of cytokine production; GO:0001818 negative regulation of cytokine production; GO:0001885 endothelia…	GO:0001725 stress fiber; GO:0005576 extracellular region; GO:0005615 extracellular space; GO:0005622 intracellular anatomical structure; GO:0005737 cytoplasm; GO:0005773 vacuole; GO:0005856 cytoskeleton; GO:0005886 plasma membrane; GO:0005929 cilium; GO:0009925 basal plasma membrane; GO:0014069 postsynaptic density; GO:0015629 actin cytoskeleton; GO:0016020 membrane; GO:0016323 basolateral plasma…	GO:0003824 catalytic activity; GO:0004672 protein kinase activity; GO:0004713 protein tyrosine kinase activity; GO:0004714 transmembrane receptor protein tyrosine kinase activity; GO:0004888 transmembrane signaling receptor activity; GO:0005008 hepatocyte growth factor receptor activity; GO:0005011 macrophage colony-stimulating factor receptor activity; GO:0005085 guanyl-nucleotide exchange facto…	PF01833; PF07714	PF01833 IPT/TIG domain; PF07714 Protein tyrosine and serine/threonine kinase	T
CGIg07030	Q90YI5 TIM8A_TAKRU Mitochondrial import inner membrane translocase subunit Tim8 A OS=Takifugu rubripes OX=31033 GN=timm8a PE=3 SV=1	timm8a	0.517299	0.00383835	0.691709	0.28692	1.81692	0.00585729	0.735947	0.341841	Up	9.29735	25.3	2	2	7533.04	5196.64	6849.59	12469.3	12710.8	12669	11499	11687.8	12387.1	11981.7	10949.9	3248.98	0.530362	0.365868	0.482244	0.8779	0.894898	0.891957	0.809587	0.822878	0.872111	0.843569	0.770922	0.228744	extracellular	K17780	TIM8; mitochondrial import inner membrane translocase subunit TIM8		GO:0006605 protein targeting; GO:0006626 protein targeting to mitochondrion; GO:0006810 transport; GO:0006811 monoatomic ion transport; GO:0006812 monoatomic cation transport; GO:0006839 mitochondrial transport; GO:0006886 intracellular protein transport; GO:0006996 organelle organization; GO:0007005 mitochondrion organization; GO:0008104 protein localization; GO:0009987 cellular process; GO:0015…	GO:0005622 intracellular anatomical structure; GO:0005737 cytoplasm; GO:0005739 mitochondrion; GO:0005740 mitochondrial envelope; GO:0005758 mitochondrial intermembrane space; GO:0016020 membrane; GO:0031967 organelle envelope; GO:0031970 organelle envelope lumen; GO:0031974 membrane-enclosed lumen; GO:0031975 envelope; GO:0043226 organelle; GO:0043227 membrane-bounded organelle; GO:0043229 intra…	GO:0005215 transporter activity; GO:0005488 binding; GO:0008270 zinc ion binding; GO:0008324 monoatomic cation transmembrane transporter activity; GO:0015075 monoatomic ion transmembrane transporter activity; GO:0015318 inorganic molecular entity transmembrane transporter activity; GO:0022857 transmembrane transporter activity; GO:0022890 inorganic cation transmembrane transporter activity; GO:00…	PF02953	PF02953 Tim10/DDP family zinc finger	U
CGIg15357	P15428 PGDH_HUMAN 15-hydroxyprostaglandin dehydrogenase [NAD(+)] OS=Homo sapiens OX=9606 GN=HPGD PE=1 SV=1	HPGD	0.604391	0.00375252	0.774026	0.0603457	1.07641	0.612774	1.18976	0.277408	Up	27.6699	16.1	4	2	6559.66	7481.15	8546.02	13006.7	12747.1	11617.5	8600.04	9139.72	6572.95	7900.94	10368.6	10656.8	0.683556	0.779582	0.890547	1.35538	1.32832	1.21061	0.896176	0.952414	0.684941	0.823326	1.08047	1.1105	cytoplasm	K00069	HPGD; 15-hydroxyprostaglandin dehydrogenase (NAD) [EC:1.1.1.141]		GO:0000003 reproduction; GO:0001523 retinoid metabolic process; GO:0001568 blood vessel development; GO:0001944 vasculature development; GO:0006066 alcohol metabolic process; GO:0006081 cellular aldehyde metabolic process; GO:0006082 organic acid metabolic process; GO:0006629 lipid metabolic process; GO:0006631 fatty acid metabolic process; GO:0006690 icosanoid metabolic process; GO:0006692 prost…	GO:0005576 extracellular region; GO:0005615 extracellular space; GO:0005622 intracellular anatomical structure; GO:0005634 nucleus; GO:0005654 nucleoplasm; GO:0005737 cytoplasm; GO:0005829 cytosol; GO:0005886 plasma membrane; GO:0016020 membrane; GO:0016323 basolateral plasma membrane; GO:0031974 membrane-enclosed lumen; GO:0031981 nuclear lumen; GO:0043226 organelle; GO:0043227 membrane-bounded …	GO:0000166 nucleotide binding; GO:0003824 catalytic activity; GO:0004745 NAD-retinol dehydrogenase activity; GO:0004888 transmembrane signaling receptor activity; GO:0004930 G protein-coupled receptor activity; GO:0004953 icosanoid receptor activity; GO:0004954 prostanoid receptor activity; GO:0004955 prostaglandin receptor activity; GO:0004957 prostaglandin E receptor activity; GO:0005488 bindin…	PF00106	PF00106 short chain dehydrogenase	IR
CGIg05669	Q9Y1A3 TIM8_DROME Mitochondrial import inner membrane translocase subunit Tim8 OS=Drosophila melanogaster OX=7227 GN=Tim8 PE=3 SV=1	Tim8	0.241443	0.00366494	0.871811	0.142271	2.58416	0.0146489	1.39729	0.0113929	Up	9.32871	25.9	2	2	870.627	1938.38	1324.88	5035.79	6376.63	5709.14	4076.29	3390.38	3215.95	4758.69	5210.45	4957.63	0.163994	0.365119	0.249557	0.948554	1.20112	1.07539	0.767822	0.638621	0.605764	0.896359	0.981454	0.933832	cytoplasm	K17780	TIM8; mitochondrial import inner membrane translocase subunit TIM8		GO:0006605 protein targeting; GO:0006626 protein targeting to mitochondrion; GO:0006810 transport; GO:0006811 monoatomic ion transport; GO:0006812 monoatomic cation transport; GO:0006839 mitochondrial transport; GO:0006886 intracellular protein transport; GO:0006996 organelle organization; GO:0007005 mitochondrion organization; GO:0008104 protein localization; GO:0009987 cellular process; GO:0015…	GO:0005622 intracellular anatomical structure; GO:0005737 cytoplasm; GO:0005739 mitochondrion; GO:0005740 mitochondrial envelope; GO:0005743 mitochondrial inner membrane; GO:0005744 TIM23 mitochondrial import inner membrane translocase complex; GO:0016020 membrane; GO:0019866 organelle inner membrane; GO:0031090 organelle membrane; GO:0031966 mitochondrial membrane; GO:0031967 organelle envelope;…	GO:0005215 transporter activity; GO:0008320 protein transmembrane transporter activity; GO:0008324 monoatomic cation transmembrane transporter activity; GO:0015075 monoatomic ion transmembrane transporter activity; GO:0015318 inorganic molecular entity transmembrane transporter activity; GO:0015399 primary active transmembrane transporter activity; GO:0015450 protein-transporting ATPase activity;…	PF02953	PF02953 Tim10/DDP family zinc finger	U
CGIg03535	Q6RI86 TRPA1_RAT Transient receptor potential cation channel subfamily A member 1 OS=Rattus norvegicus OX=10116 GN=Trpa1 PE=2 SV=1	Trpa1	0.63568	0.00366165	0.962154	0.415508	1.2951	0.0290015	1.1687	0.0360631	Up	106.691	6.2	6	6	4876.44	4623.5	5876.12	8368.28	7866.3	7953.8	6279.71	6983.24	6650.59	7646.06	8339.88	7287.01	0.609773	0.578145	0.734778	1.04641	0.983639	0.994581	0.785244	0.873217	0.831622	0.956099	1.04286	0.911202	cytoplasm	K15503	ANKRD44; serine/threonine-protein phosphatase 6 regulatory ankyrin repeat subunit B		GO:0000302 response to reactive oxygen species; GO:0001580 detection of chemical stimulus involved in sensory perception of bitter taste; GO:0002791 regulation of peptide secretion; GO:0002793 positive regulation of peptide secretion; GO:0003008 system process; GO:0003012 muscle system process; GO:0006810 transport; GO:0006811 monoatomic ion transport; GO:0006812 monoatomic cation transport; GO:0…	GO:0005886 plasma membrane; GO:0016020 membrane; GO:0016324 apical plasma membrane; GO:0030424 axon; GO:0032421 stereocilium bundle; GO:0032991 protein-containing complex; GO:0034702 monoatomic ion channel complex; GO:0034703 cation channel complex; GO:0042995 cell projection; GO:0043005 neuron projection; GO:0045177 apical part of cell; GO:0071944 cell periphery; GO:0098590 plasma membrane regio…	GO:0004888 transmembrane signaling receptor activity; GO:0005034 osmosensor activity; GO:0005215 transporter activity; GO:0005216 monoatomic ion channel activity; GO:0005217 intracellular ligand-gated monoatomic ion channel activity; GO:0005244 voltage-gated monoatomic ion channel activity; GO:0005245 voltage-gated calcium channel activity; GO:0005261 monoatomic cation channel activity; GO:000526…			R
CGIg19913	Q8N6D5 ANR29_HUMAN Ankyrin repeat domain-containing protein 29 OS=Homo sapiens OX=9606 GN=ANKRD29 PE=1 SV=2	ANKRD29	0.574389	0.00364511	0.718057	1.56952e-05	1.09041	0.38878	1.14647	0.0144799	Up	33.3381	14.6	4	4	20434.8	20681.8	15605.9	32593	33329.6	32829.9	21394.8	21094.1	19361.9	23145.2	24094	23670.8	0.736126	0.745024	0.562176	1.17411	1.20064	1.18264	0.770711	0.759879	0.697477	0.833765	0.867946	0.852699	cytoplasm				GO:0006810 transport; GO:0006888 endoplasmic reticulum to Golgi vesicle-mediated transport; GO:0016192 vesicle-mediated transport; GO:0046907 intracellular transport; GO:0048193 Golgi vesicle transport; GO:0051179 localization; GO:0051234 establishment of localization; GO:0051641 cellular localization; GO:0051649 establishment of localization in cell;	GO:0005886 plasma membrane; GO:0016020 membrane; GO:0071944 cell periphery;	GO:0005488 binding; GO:0005515 protein binding; GO:0008092 cytoskeletal protein binding; GO:0008093 cytoskeletal anchor activity; GO:0030674 protein-macromolecule adaptor activity; GO:0060090 molecular adaptor activity;			M
CGIg22450	XP_034300100.1 alpha-2 adrenergic receptor [Crassostrea gigas]	--	0.253889	0.00359309	0.796865	0.438112	2.26103	0.28974	1.38814	0.673854	Up	51.4119	2.8	1	1		606.007	875.338	2992.41	2531.45	3228.05	2463.33	1903.44	657.293	772.715	2513.53	3687.85		0.247482	0.357473	1.22205	1.0338	1.31828	1.00598	0.77733	0.268427	0.315563	1.02648	1.50605	plasma membrane	K04138	ADRA2A; adrenergic receptor alpha-2A	map04022 cGMP-PKG signaling pathway; map04080 Neuroactive ligand-receptor interaction						R
CGIg24548	O00629 IMA3_HUMAN Importin subunit alpha-3 OS=Homo sapiens OX=9606 GN=KPNA4 PE=1 SV=1	KPNA4	0.466692	0.00358988	0.779013	0.0158554	2.23818	0.00334933	0.745794	0.0144615	Up	56.7955	1.9	1	1	2374.51	2161.85	1602.54	4531.59	4607.36	4015.11	4611.43	4995.73	4132.81	3327.82	3203.32	3716.04	0.543263	0.494609	0.366645	1.03678	1.05412	0.918616	1.05505	1.14297	0.945544	0.761372	0.732886	0.850192	cytoplasm	K23583	KPNA3_4; importin subunit alpha-4/3	map03013 Nucleocytoplasmic transport	GO:0000003 reproduction; GO:0000280 nuclear division; GO:0000302 response to reactive oxygen species; GO:0002119 nematode larval development; GO:0002164 larval development; GO:0003006 developmental process involved in reproduction; GO:0006606 protein import into nucleus; GO:0006607 NLS-bearing protein import into nucleus; GO:0006810 transport; GO:0006886 intracellular protein transport; GO:000691…	GO:0005622 intracellular anatomical structure; GO:0005634 nucleus; GO:0005635 nuclear envelope; GO:0005643 nuclear pore; GO:0005654 nucleoplasm; GO:0005737 cytoplasm; GO:0005829 cytosol; GO:0012505 endomembrane system; GO:0016020 membrane; GO:0031090 organelle membrane; GO:0031965 nuclear membrane; GO:0031967 organelle envelope; GO:0031974 membrane-enclosed lumen; GO:0031975 envelope; GO:0031981 …	GO:0005048 signal sequence binding; GO:0005102 signaling receptor binding; GO:0005112 Notch binding; GO:0005215 transporter activity; GO:0005488 binding; GO:0005515 protein binding; GO:0008092 cytoskeletal protein binding; GO:0008139 nuclear localization sequence binding; GO:0017022 myosin binding; GO:0033218 amide binding; GO:0042277 peptide binding;			U
CGIg13206	XP_034307464.1 heavy metal-binding protein HIP-like [Crassostrea gigas]	--	0.385646	0.00353493	0.699961	0.0942509	2.21649	3.01393e-05	0.818876	0.013941	Up	11.8886	22.1	2	0	22325.7	22594.4	20744.7	66785.7	62123.5	41362.6	51133.6	46980.4	47431.3	42765.7	39079.5	37338.4	0.70984	0.718384	0.659574	2.12344	1.9752	1.31512	1.62578	1.49373	1.50807	1.35973	1.24253	1.18717	extracellular	K23284	C1QL; C1q-related factor
CGIg20609	XP_011424451.1 uncharacterized protein LOC105326246 [Crassostrea gigas]	--	0.500735	0.00352585	0.939963	0.365764	2.65677	0.00548388	0.70656	0.0921941	Up	23.7097	3.8	1	1	3929.13	4134.52	5647.75	9094.69	9381.34	8906.5	9304.18	12172.5	14951.4	9671.34	7897.74	8169.48	0.324438	0.341398	0.466349	0.750972	0.774641	0.735433	0.76827	1.00511	1.23457	0.798587	0.652137	0.674575	plasma membrane
CGIg23089	F1QYJ6 ST6B1_DANRE Sulfotransferase 6B1 OS=Danio rerio OX=7955 GN=sult6b1 PE=1 SV=1	sult6b1	0.657254	0.00348745	0.66085	0.0378551	1.16001	0.672959	0.866775	0.682698	Up	33.6875	9.8	2	2	7173.61	7767.65	8981.51	12315.1	11671.2	12411.8	10670.3	11436.1	5644.34	7599.52	10179.9	6274.18	0.530776	0.574729	0.664543	0.911198	0.86355	0.918348	0.789499	0.846155	0.417626	0.562289	0.753215	0.464227	nucleus	K22523	SULT6B1; sulfotransferase 6B1 [EC:2.8.2.-]					PF00685	PF00685 Sulfotransferase domain	R
CGIg07152	XP_011444170.1 uncharacterized protein LOC105340033 isoform X2 [Crassostrea gigas]	--	0.64637	0.00345274	0.648442	0.00371801	0.836692	0.00118433	1.19901	0.00175332	Up	53.219	26.5	9	9	19854.7	20467.1	20620.1	33664.5	33352	27266.9	17514	16439.6	17036	20330.5	20973.8	19833	0.661085	0.681475	0.686569	1.12089	1.11049	0.907881	0.583148	0.547376	0.567232	0.676928	0.698344	0.660362	cytoplasm	K18740	EXD1, EGL; exonuclease 3'-5' domain-containing protein 1		GO:0000003 reproduction; GO:0000226 microtubule cytoskeleton organization; GO:0000578 embryonic axis specification; GO:0001709 cell fate determination; GO:0002164 larval development; GO:0002165 instar larval or pupal development; GO:0002168 instar larval development; GO:0003002 regionalization; GO:0003006 developmental process involved in reproduction; GO:0006403 RNA localization; GO:0006417 regu…		GO:0003676 nucleic acid binding; GO:0003723 RNA binding; GO:0003729 mRNA binding; GO:0005488 binding; GO:0005515 protein binding; GO:0097159 organic cyclic compound binding; GO:1901363 heterocyclic compound binding;	PF01612	PF01612 3'-5' exonuclease	L
CGIg03747	XP_011441544.2 uncharacterized protein LOC105338226 [Crassostrea gigas]	--	0.485871	0.00344368	0.554512	0.00105256	1.48612	0.034259	0.767957	0.0367028	Up	27.1686	4.1	1	1	6434.23	8906.75	9157.04	15958.3	16561.6	17900.9	12793.4	12889.3	10724.3	9760.06	8225.73	9973.18	0.509146	0.704798	0.724604	1.2628	1.31054	1.41651	1.01235	1.01994	0.848619	0.772321	0.650908	0.789186	extracellular	K23284	C1QL; C1q-related factor					PF00386	PF00386 C1q domain
CGIg25797	Q96MM6 HS12B_HUMAN Heat shock 70 kDa protein 12B OS=Homo sapiens OX=9606 GN=HSPA12B PE=1 SV=2	HSPA12B	0.630045	0.00334465	0.673611	0.00486653	0.753079	0.0086103	1.4197	0.00289976	Up	66.6924	7.1	4	3	2537.17	2314.55	2406.31	3487.57	4367.84	3664.44	1653.39	1825.16	1987.32	2531.47	2595.69	2632.73	0.810233	0.739142	0.768444	1.11374	1.39485	1.17022	0.528002	0.582856	0.634643	0.808414	0.828924	0.840752	cytoplasm									O
CGIg21028	A7RM45 LMBD1_NEMVE Probable lysosomal cobalamin transporter OS=Nematostella vectensis OX=45351 GN=v1g160387 PE=3 SV=1	v1g160387	0.596063	0.00331022	0.83196	0.0314008	1.12743	0.357279	1.238	0.0783101	Up	61.1968	2	1	1	9426.57	7459.16	8402.61	13234.7	13689.4	15501.5	8958.14	11214.1	8338.53	11709.4	12385	11202.1	0.862051	0.682133	0.768411	1.21031	1.25188	1.4176	0.819213	1.02552	0.762551	1.07081	1.1326	1.02442	plasma membrane	K14617	LMBRD1; LMBR1 domain-containing protein 1	map04977 Vitamin digestion and absorption	GO:0006725 cellular aromatic compound metabolic process; GO:0006766 vitamin metabolic process; GO:0006767 water-soluble vitamin metabolic process; GO:0006807 nitrogen compound metabolic process; GO:0006810 transport; GO:0006855 xenobiotic transmembrane transport; GO:0006897 endocytosis; GO:0006898 receptor-mediated endocytosis; GO:0008152 metabolic process; GO:0009235 cobalamin metabolic process;…	GO:0000323 lytic vacuole; GO:0005622 intracellular anatomical structure; GO:0005737 cytoplasm; GO:0005764 lysosome; GO:0005765 lysosomal membrane; GO:0005773 vacuole; GO:0005774 vacuolar membrane; GO:0005886 plasma membrane; GO:0016020 membrane; GO:0030135 coated vesicle; GO:0030136 clathrin-coated vesicle; GO:0030139 endocytic vesicle; GO:0031090 organelle membrane; GO:0031410 cytoplasmic vesicl…	GO:0003824 catalytic activity; GO:0005102 signaling receptor binding; GO:0005158 insulin receptor binding; GO:0005215 transporter activity; GO:0005488 binding; GO:0005515 protein binding; GO:0015399 primary active transmembrane transporter activity; GO:0015420 ABC-type vitamin B12 transporter activity; GO:0016462 pyrophosphatase activity; GO:0016787 hydrolase activity; GO:0016817 hydrolase activi…
CGIg09503	Q8IW41 MAPK5_HUMAN MAP kinase-activated protein kinase 5 OS=Homo sapiens OX=9606 GN=MAPKAPK5 PE=1 SV=2	MAPKAPK5	0.598384	0.0032999	0.851447	0.00143834	1.26732	0.155352	1.12277	0.300565	Up	54.0171	12.5	5	5	1790.27	1489.55	1969.46	2992.15	2914.34	2865.95	2346.25	1785.76	2520.49	2487.22	2561.27	2420.77	0.591216	0.491905	0.65039	0.988119	0.962424	0.946445	0.774821	0.589726	0.83236	0.821375	0.845829	0.799429	cytoplasm	K04442	MAPKAPK5, PRAK; mitogen-activated protein kinase-activated protein kinase 5 [EC:2.7.11.1]	map04010 MAPK signaling pathway	GO:0000165 MAPK cascade; GO:0001932 regulation of protein phosphorylation; GO:0001934 positive regulation of protein phosphorylation; GO:0006417 regulation of translation; GO:0006468 protein phosphorylation; GO:0006793 phosphorus metabolic process; GO:0006796 phosphate-containing compound metabolic process; GO:0006807 nitrogen compound metabolic process; GO:0006950 response to stress; GO:0007154 …	GO:0005622 intracellular anatomical structure; GO:0005634 nucleus; GO:0005654 nucleoplasm; GO:0005737 cytoplasm; GO:0005829 cytosol; GO:0005856 cytoskeleton; GO:0031974 membrane-enclosed lumen; GO:0031981 nuclear lumen; GO:0032156 septin cytoskeleton; GO:0032991 protein-containing complex; GO:0043226 organelle; GO:0043227 membrane-bounded organelle; GO:0043228 non-membrane-bounded organelle; GO:0…	GO:0002039 p53 binding; GO:0003824 catalytic activity; GO:0004672 protein kinase activity; GO:0004674 protein serine/threonine kinase activity; GO:0004683 calmodulin-dependent protein kinase activity; GO:0004708 MAP kinase kinase activity; GO:0004712 protein serine/threonine/tyrosine kinase activity; GO:0005488 binding; GO:0005515 protein binding; GO:0005516 calmodulin binding; GO:0009931 calcium…	PF00069	PF00069 Protein kinase domain	T
CGIg16544	A4IF78 TFIP8_BOVIN Tumor necrosis factor alpha-induced protein 8 OS=Bos taurus OX=9913 GN=TNFAIP8 PE=2 SV=1	TNFAIP8	0.543456	0.00324564	0.491156	0.00220086	0.98394	0.936092	0.918517	0.455469	Up	25.5847	8.9	2	2	16763.3	15416.1	21229.3	33476.8	33444.6	31354.6	18202.4	18494.8	15853.7	17802.4	17435.4	13031.1	0.462889	0.425688	0.586208	0.924403	0.923515	0.865801	0.502627	0.510701	0.437773	0.491581	0.481448	0.359832	cytoplasm				GO:0001816 cytokine production; GO:0001932 regulation of protein phosphorylation; GO:0001934 positive regulation of protein phosphorylation; GO:0006915 apoptotic process; GO:0006950 response to stress; GO:0006952 defense response; GO:0007275 multicellular organism development; GO:0007431 salivary gland development; GO:0007435 salivary gland morphogenesis; GO:0008219 cell death; GO:0009605 respons…	GO:0005622 intracellular anatomical structure; GO:0005634 nucleus; GO:0005654 nucleoplasm; GO:0005737 cytoplasm; GO:0031974 membrane-enclosed lumen; GO:0031981 nuclear lumen; GO:0042995 cell projection; GO:0043226 organelle; GO:0043227 membrane-bounded organelle; GO:0043229 intracellular organelle; GO:0043231 intracellular membrane-bounded organelle; GO:0043233 organelle lumen; GO:0070013 intrace…	GO:0004857 enzyme inhibitor activity; GO:0004866 endopeptidase inhibitor activity; GO:0004869 cysteine-type endopeptidase inhibitor activity; GO:0030234 enzyme regulator activity; GO:0030414 peptidase inhibitor activity; GO:0043027 cysteine-type endopeptidase inhibitor activity involved in apoptotic process; GO:0043028 cysteine-type endopeptidase regulator activity involved in apoptotic process; …
CGIg09072	P56812 PDCD5_MOUSE Programmed cell death protein 5 OS=Mus musculus OX=10090 GN=Pdcd5 PE=1 SV=3	Pdcd5	0.311745	0.00324042	0.755837	0.0596031	3.55485	0.00324161	0.682035	0.0466705	Up	14.2541	14.2	2	2	1710.07	1019.35	1735.12	4575.04	4300.11	5445.96	5951.62	5670.12	4249.02	3889.96	3045.76	3888.7	0.291486	0.17375	0.295755	0.779825	0.732964	0.928276	1.01447	0.966485	0.724256	0.663053	0.519156	0.662838	cytoplasm	K06875	PDCD5, TFAR19; programmed cell death protein 5		GO:0006915 apoptotic process; GO:0008219 cell death; GO:0008285 negative regulation of cell population proliferation; GO:0009719 response to endogenous stimulus; GO:0009893 positive regulation of metabolic process; GO:0009966 regulation of signal transduction; GO:0009967 positive regulation of signal transduction; GO:0009987 cellular process; GO:0010033 response to organic substance; GO:0010468 r…	GO:0005622 intracellular anatomical structure; GO:0005634 nucleus; GO:0005737 cytoplasm; GO:0005829 cytosol; GO:0043226 organelle; GO:0043227 membrane-bounded organelle; GO:0043229 intracellular organelle; GO:0043231 intracellular membrane-bounded organelle;	GO:0005488 binding; GO:0005515 protein binding; GO:0005539 glycosaminoglycan binding; GO:0008047 enzyme activator activity; GO:0008092 cytoskeletal protein binding; GO:0008201 heparin binding; GO:0010698 acetyltransferase activator activity; GO:0015631 tubulin binding; GO:0030234 enzyme regulator activity; GO:0043167 ion binding; GO:0043168 anion binding; GO:0048487 beta-tubulin binding; GO:00973…			D
CGIg13192	XP_034307186.1 multiple epidermal growth factor-like domains protein 10 [Crassostrea gigas]	--	0.504629	0.00317055	0.525697	0	1.60789	0.00896371	0.647899	0	Up	20.5532	8.2	1	1	3054.9	3892.13	4017.04	7907	6356.42	7463.56	5320.24	6358.52	5950.23	3807.27			0.482784	0.615096	0.634837	1.24959	1.00454	1.17951	0.840788	1.00487	0.94035	0.601685			extracellular
CGIg01714	XP_034322193.1 multiple epidermal growth factor-like domains protein 10 isoform X1 [Crassostrea gigas]	--	0.439827	0.0031656	0.369678	0.00135608	3.08686	0.000188694	0.272286	7.80052e-05	Up	56.8073	1.9	1	1	3916.59	3465.62	4617.61	9671.07	7411.61	10200.3	12595	12606.9	11839.8	2914.02	3381.43	3790.48	0.461991	0.408796	0.544682	1.14078	0.874255	1.20321	1.48568	1.48707	1.3966	0.343731	0.398865	0.447116	plasma membrane	K13297	PTPRT; receptor-type tyrosine-protein phosphatase T [EC:3.1.3.48]
CGIg19557	P10463 CAYP1_CANLF Calcyphosin OS=Canis lupus familiaris OX=9615 GN=CAPS PE=1 SV=1	CAPS	0.464711	0.00314707	0.781894	0.0255077	1.41561	0.0452034	1.18856	0.0882732	Up	24.5728	8.9	2	2	8493.33	11605.6	12513.2	24861.5	22556.1	22759.5	16502.7	15263.6	14399.7	17811.1	20567.5	16492.6	0.358613	0.490022	0.528343	1.04973	0.952386	0.960974	0.696794	0.644473	0.607998	0.752037	0.868419	0.696364	cytoplasm,nucleus	K23909	CAPS; calcyphosin					PF13833; PF13499	PF13833 EF-hand domain pair; PF13499 EF-hand domain pair	T
CGIg08516	Q9HC07 TM165_HUMAN Transmembrane protein 165 OS=Homo sapiens OX=9606 GN=TMEM165 PE=1 SV=1	TMEM165	0.572726	0.00292445	0.369232	0.133024	1.48979	0.020749	0.432742	0.173707	Up	31.738	3.8	1	1	7931.81	10525.6	9819.09	16675	15868.2	16828.7	15214.4	14663.3	12248.2	962.145	8201.45	9066.08	0.533507	0.707973	0.660449	1.12159	1.06733	1.13192	1.02335	0.986281	0.823838	0.0647155	0.551643	0.6098	plasma membrane	K23541	TMEM165, GDT1; Ca2+/H+ antiporter, TMEM165/GDT1 family		GO:0006486 protein glycosylation; GO:0006487 protein N-linked glycosylation; GO:0006807 nitrogen compound metabolic process; GO:0006810 transport; GO:0006811 monoatomic ion transport; GO:0006812 monoatomic cation transport; GO:0006816 calcium ion transport; GO:0006873 intracellular monoatomic ion homeostasis; GO:0006874 intracellular calcium ion homeostasis; GO:0006885 regulation of pH; GO:000699…	GO:0000139 Golgi membrane; GO:0000323 lytic vacuole; GO:0005622 intracellular anatomical structure; GO:0005737 cytoplasm; GO:0005764 lysosome; GO:0005765 lysosomal membrane; GO:0005768 endosome; GO:0005769 early endosome; GO:0005770 late endosome; GO:0005773 vacuole; GO:0005774 vacuolar membrane; GO:0005794 Golgi apparatus; GO:0005802 trans-Golgi network; GO:0010008 endosome membrane; GO:0012505 …				S
CGIg15682	XP_034323378.1 uncharacterized protein LOC105321581 [Crassostrea gigas]	--	0.633643	0.00291256	0.476016	0.00810902	2.43997	6.40367e-05	0.307888	0.00125878	Up	20.0178	18.3	3	3	22222.9	20079.2	21030.4	32363.7	37417.2	30168.9	50837.1	48116.9	55575.3	11789	18731.6	17057	0.643944	0.581827	0.60939	0.93779	1.08422	0.874193	1.47309	1.39427	1.61038	0.341607	0.542778	0.494255	extracellular
CGIg11782	A7RRJ0 FEN1_NEMVE Flap endonuclease 1 OS=Nematostella vectensis OX=45351 GN=FEN1 PE=3 SV=1	FEN1	0.626738	0.00290571	0.979962	0.410547	1.61498	0.0029109	0.968178	0.309388	Up	42.8782	3.2	1	1	8665	6774.39	7508.88	12487.9	12231.6	11896	11827.7	12553	12680.4	12366.6	11695.3	11819.9	0.973058	0.760748	0.843229	1.40236	1.37357	1.33589	1.32822	1.40967	1.42398	1.38874	1.31335	1.32735	nucleus	K04799	FEN1, RAD2; flap endonuclease-1 [EC:3.1.-.-]	map03030 DNA replication; map03410 Base excision repair; map03450 Non-homologous end-joining	GO:0000723 telomere maintenance; GO:0000724 double-strand break repair via homologous recombination; GO:0000725 recombinational repair; GO:0001654 eye development; GO:0003008 system process; GO:0006139 nucleobase-containing compound metabolic process; GO:0006259 DNA metabolic process; GO:0006260 DNA replication; GO:0006261 DNA-templated DNA replication; GO:0006271 DNA strand elongation involved i…	GO:0005622 intracellular anatomical structure; GO:0005634 nucleus; GO:0005654 nucleoplasm; GO:0005730 nucleolus; GO:0005737 cytoplasm; GO:0005739 mitochondrion; GO:0031974 membrane-enclosed lumen; GO:0031981 nuclear lumen; GO:0032991 protein-containing complex; GO:0043226 organelle; GO:0043227 membrane-bounded organelle; GO:0043228 non-membrane-bounded organelle; GO:0043229 intracellular organell…	GO:0000287 magnesium ion binding; GO:0003676 nucleic acid binding; GO:0003677 DNA binding; GO:0003684 damaged DNA binding; GO:0003690 double-stranded DNA binding; GO:0003824 catalytic activity; GO:0004518 nuclease activity; GO:0004519 endonuclease activity; GO:0004520 DNA endonuclease activity; GO:0004521 RNA endonuclease activity; GO:0004523 RNA-DNA hybrid ribonuclease activity; GO:0004527 exonu…			L
CGIg04072	O35936 ALOX8_MOUSE Polyunsaturated fatty acid lipoxygenase ALOX8 OS=Mus musculus OX=10090 GN=Alox8 PE=1 SV=1	Alox8	0.468889	0.00288683	0.584547	0.00225367	2.08118	0.1298	0.599019	0.269514	Up	68.602	5.3	3	1	4796.98	4205.77	3312.02	9568.5	8474.69	8220.55	10384.2	11173.6	4071.47	5268.76	4520.82	5562.8	0.460694	0.403914	0.318081	0.918942	0.813894	0.789487	0.997277	1.07309	0.391017	0.506002	0.434172	0.534241	cytoplasm	K00461	ALOX5; arachidonate 5-lipoxygenase [EC:1.13.11.34]	map00590 Arachidonic acid metabolism; map01100 Metabolic pathways; map04664 Fc epsilon RI signaling pathway; map04726 Serotonergic synapse; map04913 Ovarian steroidogenesis	GO:0001676 long-chain fatty acid metabolic process; GO:0001775 cell activation; GO:0002252 immune effector process; GO:0002263 cell activation involved in immune response; GO:0002274 myeloid leukocyte activation; GO:0002275 myeloid cell activation involved in immune response; GO:0002283 neutrophil activation involved in immune response; GO:0002366 leukocyte activation involved in immune response;…	GO:0005576 extracellular region; GO:0005622 intracellular anatomical structure; GO:0005634 nucleus; GO:0005635 nuclear envelope; GO:0005641 nuclear envelope lumen; GO:0005654 nucleoplasm; GO:0005737 cytoplasm; GO:0005829 cytosol; GO:0005886 plasma membrane; GO:0012505 endomembrane system; GO:0016020 membrane; GO:0016363 nuclear matrix; GO:0030141 secretory granule; GO:0030425 dendrite; GO:0031090…	GO:0003824 catalytic activity; GO:0004051 arachidonate 5-lipoxygenase activity; GO:0005488 binding; GO:0005506 iron ion binding; GO:0016491 oxidoreductase activity; GO:0016701 oxidoreductase activity, acting on single donors with incorporation of molecular oxygen; GO:0016702 oxidoreductase activity, acting on single donors with incorporation of molecular oxygen, incorporation of two atoms of oxyg…	PF00305	PF00305 Lipoxygenase
CGIg14510	Q7L0Y3 TM10C_HUMAN tRNA methyltransferase 10 homolog C OS=Homo sapiens OX=9606 GN=TRMT10C PE=1 SV=2	TRMT10C	0.48368	0.00280289	0.960453	0.736105	0.936185	0.685795	2.12108	0.0661001	Up	43.5233	5.2	2	2	6533.3	6490.08	4933.06	11572.8	13957.4	11594.4	6942.56	2896.66	6971.33	13945.4	12797.2	8913.94	0.538984	0.535419	0.406968	0.954735	1.15146	0.956513	0.572747	0.238969	0.57512	1.15046	1.05574	0.735382	mitochondria	K17654	TRMT10C, MRPP1; mitochondrial ribonuclease P protein 1 [EC:2.1.1.-]		GO:0000959 mitochondrial RNA metabolic process; GO:0000963 mitochondrial RNA processing; GO:0000964 mitochondrial RNA 5'-end processing; GO:0000965 mitochondrial RNA 3'-end processing; GO:0000966 RNA 5'-end processing; GO:0001510 RNA methylation; GO:0006139 nucleobase-containing compound metabolic process; GO:0006396 RNA processing; GO:0006399 tRNA metabolic process; GO:0006400 tRNA modification;…	GO:0005622 intracellular anatomical structure; GO:0005634 nucleus; GO:0005654 nucleoplasm; GO:0005737 cytoplasm; GO:0005739 mitochondrion; GO:0005759 mitochondrial matrix; GO:0030677 ribonuclease P complex; GO:0030678 mitochondrial ribonuclease P complex; GO:0031974 membrane-enclosed lumen; GO:0031981 nuclear lumen; GO:0032991 protein-containing complex; GO:0043226 organelle; GO:0043227 membrane-…	GO:0000049 tRNA binding; GO:0003676 nucleic acid binding; GO:0003723 RNA binding; GO:0003824 catalytic activity; GO:0005488 binding; GO:0008168 methyltransferase activity; GO:0008173 RNA methyltransferase activity; GO:0008174 mRNA methyltransferase activity; GO:0008175 tRNA methyltransferase activity; GO:0008757 S-adenosylmethionine-dependent methyltransferase activity; GO:0016423 tRNA (guanine) …			S
CGIg22497	Q8TD35 LKAM1_HUMAN Protein LKAAEAR1 OS=Homo sapiens OX=9606 GN=LKAAEAR1 PE=1 SV=3	LKAAEAR1	0.516612	0.00270379	0.848754	0.100686	1.79688	0.00169264	0.914323	0.111351	Up	20.2314	11.5	2	2	14026.2	14307.3	11246.2	27809.2	22481.6	26323.4	24213.9	22943	23963	21235.4	23427.6	20363.6	0.499236	0.509242	0.400289	0.989815	0.800188	0.93693	0.861847	0.816613	0.852916	0.755832	0.83386	0.724805	cytoplasm,nucleus
CGIg26476	XP_011436001.2 uncharacterized protein LOC105334304 [Crassostrea gigas]	--	0.325298	0.00267693	1.08973	0.528109	5.19691	0.00550463	0.644602	0.0945757	Up	53.6286	4.8	2	2	1347.1	1533.1		4564.79	3730.17	4986.12	7345.29	9717.12	5389.85	4416.52	4345.17	5711.08	0.190289	0.216562		0.644811	0.526915	0.704327	1.03758	1.37262	0.761357	0.623867	0.613788	0.806733	plasma membrane
CGIg15772	Q0P5A5 CKS1_BOVIN Cyclin-dependent kinases regulatory subunit 1 OS=Bos taurus OX=9913 GN=CKS1B PE=3 SV=1	CKS1B	0.450244	0.00262496	0.679965	0.279966	1.77285	0.009376	0.851858	0.509823	Up	10.486	10.3	1	1	1360.65	1474.49	1980.16	3277.59	3675.48	3741.81	2588.88	2878.14	3069.78	3469.38	2917.64	885.125	0.428703	0.464571	0.623895	1.03268	1.15804	1.17894	0.815685	0.906821	0.967202	1.0931	0.919267	0.278878	cytoplasm	K02219	CKS1; cyclin-dependent kinase regulatory subunit CKS1		GO:0000003 reproduction; GO:0000079 regulation of cyclin-dependent protein serine/threonine kinase activity; GO:0000212 meiotic spindle organization; GO:0000226 microtubule cytoskeleton organization; GO:0000278 mitotic cell cycle; GO:0000280 nuclear division; GO:0001932 regulation of protein phosphorylation; GO:0001934 positive regulation of protein phosphorylation; GO:0002009 morphogenesis of an…	GO:0000151 ubiquitin ligase complex; GO:0000307 cyclin-dependent protein kinase holoenzyme complex; GO:0005622 intracellular anatomical structure; GO:0005634 nucleus; GO:0005654 nucleoplasm; GO:0019005 SCF ubiquitin ligase complex; GO:0031461 cullin-RING ubiquitin ligase complex; GO:0031974 membrane-enclosed lumen; GO:0031981 nuclear lumen; GO:0032991 protein-containing complex; GO:0043226 organe…	GO:0003682 chromatin binding; GO:0005488 binding; GO:0005515 protein binding; GO:0008047 enzyme activator activity; GO:0016538 cyclin-dependent protein serine/threonine kinase regulator activity; GO:0019207 kinase regulator activity; GO:0019209 kinase activator activity; GO:0019887 protein kinase regulator activity; GO:0019899 enzyme binding; GO:0019900 kinase binding; GO:0019901 protein kinase b…	PF01111	PF01111 Cyclin-dependent kinase regulatory subunit	D
CGIg08675	O43752 STX6_HUMAN Syntaxin-6 OS=Homo sapiens OX=9606 GN=STX6 PE=1 SV=1	STX6	0.559499	0.00261792	0.563115	0.000903157	1.37672	0.0186588	0.731057	0.00663082	Up	30.3913	15.4	4	4	3319.14	3166.73	2708.63	5671.04	4837.62	5924.81	4708.31	3934.44	4015.53	3074.32	3193.19	2986.42	0.650337	0.620474	0.530717	1.11116	0.94786	1.16088	0.922524	0.770896	0.786785	0.602367	0.625659	0.585144	cytoplasm	K08498	STX6; syntaxin 6	map04130 SNARE interactions in vesicular transport	GO:0006810 transport; GO:0006836 neurotransmitter transport; GO:0006886 intracellular protein transport; GO:0006887 exocytosis; GO:0006904 vesicle docking involved in exocytosis; GO:0006906 vesicle fusion; GO:0006996 organelle organization; GO:0007030 Golgi organization; GO:0007032 endosome organization; GO:0007154 cell communication; GO:0007267 cell-cell signaling; GO:0007268 chemical synaptic t…	GO:0000138 Golgi trans cisterna; GO:0000139 Golgi membrane; GO:0005622 intracellular anatomical structure; GO:0005634 nucleus; GO:0005654 nucleoplasm; GO:0005737 cytoplasm; GO:0005768 endosome; GO:0005769 early endosome; GO:0005794 Golgi apparatus; GO:0005795 Golgi stack; GO:0005802 trans-Golgi network; GO:0005829 cytosol; GO:0005886 plasma membrane; GO:0008021 synaptic vesicle; GO:0012505 endome…	GO:0000149 SNARE binding; GO:0005484 SNAP receptor activity; GO:0005488 binding; GO:0005515 protein binding; GO:0019905 syntaxin binding;	PF09177	PF09177 Syntaxin 6, N-terminal	U
CGIg19840	P0C6B8 SVEP1_RAT Sushi, von Willebrand factor type A, EGF and pentraxin domain-containing protein 1 OS=Rattus norvegicus OX=10116 GN=Svep1 PE=1 SV=1	Svep1	0.639953	0.00261586	0.901437	0.131778	1.45202	0.00944435	0.970095	0.692467	Up	204.906	4.1	6	6	41796.9	34190.6	35801.5	56844.6	61621.5	56217	53598.3	59224.5	49497.2	57387.1	51166.1	48912.6	0.631818	0.516839	0.54119	0.859285	0.931494	0.849798	0.810212	0.895261	0.74822	0.867485	0.773447	0.739383	cytoplasm				GO:0001709 cell fate determination; GO:0003002 regionalization; GO:0006950 response to stress; GO:0006952 defense response; GO:0007275 multicellular organism development; GO:0007389 pattern specification process; GO:0007423 sensory organ development; GO:0007424 open tracheal system development; GO:0008052 sensory organ boundary specification; GO:0008104 protein localization; GO:0008593 regulation…	GO:0005622 intracellular anatomical structure; GO:0005737 cytoplasm; GO:0005768 endosome; GO:0005769 early endosome; GO:0005886 plasma membrane; GO:0010008 endosome membrane; GO:0012505 endomembrane system; GO:0016020 membrane; GO:0016324 apical plasma membrane; GO:0031090 organelle membrane; GO:0031410 cytoplasmic vesicle; GO:0031901 early endosome membrane; GO:0031982 vesicle; GO:0043226 organe…	GO:0005102 signaling receptor binding; GO:0005112 Notch binding; GO:0005488 binding; GO:0005515 protein binding;	PF00059; PF00431; PF00084; PF00008	PF00059 Lectin C-type domain; PF00431 CUB domain; PF00084 Sushi repeat (SCR repeat); PF00008 EGF-like domain	T
CGIg12689	Q5FWU8 ZMY10_XENLA Zinc finger MYND domain-containing protein 10 OS=Xenopus laevis OX=8355 GN=zmynd10 PE=2 SV=1	zmynd10	0.598123	0.00261013	0.523668	0.000147425	1.00247	0.929775	0.873366	0.0565261	Up	52.3492	7.5	3	3	17484	14065.5	13785.9	24459.5	25734.4	25602.2	14562.4	14905	15979.8	12480.9	14372.7	12838.4	1.03566	0.833162	0.816604	1.44885	1.52437	1.51654	0.862595	0.882891	0.946559	0.739299	0.851364	0.760477	cytoplasm	K24030	ZMYND10; zinc finger MYND domain-containing protein 10		GO:0000226 microtubule cytoskeleton organization; GO:0001578 microtubule bundle formation; GO:0003008 system process; GO:0006996 organelle organization; GO:0007010 cytoskeleton organization; GO:0007017 microtubule-based process; GO:0007600 sensory perception; GO:0007605 sensory perception of sound; GO:0009987 cellular process; GO:0010638 positive regulation of organelle organization; GO:0016043 c…	GO:0005622 intracellular anatomical structure; GO:0005737 cytoplasm; GO:0005813 centrosome; GO:0005815 microtubule organizing center; GO:0005856 cytoskeleton; GO:0005886 plasma membrane; GO:0015630 microtubule cytoskeleton; GO:0016020 membrane; GO:0016324 apical plasma membrane; GO:0034451 centriolar satellite; GO:0036477 somatodendritic compartment; GO:0043025 neuronal cell body; GO:0043226 orga…	GO:0005488 binding; GO:0008270 zinc ion binding; GO:0043167 ion binding; GO:0043169 cation binding; GO:0046872 metal ion binding; GO:0046914 transition metal ion binding;	PF01753	PF01753 MYND finger
CGIg21139	B3DLU1 NCALD_XENTR Neurocalcin-delta OS=Xenopus tropicalis OX=8364 GN=ncald PE=2 SV=1	ncald	0.344813	0.00245636	0.897519	0.543973	0.813312	0.470336	3.20039	0.113533	Up	21.5965	13.8	2	2	5078.26	4798.23	3951.73	15272	14801	10030.5	506	5040.96	5699.7	12445.5	11334.9	12213.3	0.227004	0.214486	0.176647	0.682676	0.661621	0.448377	0.0226188	0.225336	0.254783	0.556326	0.506682	0.54595	cytoplasm	K19695	NCALD; neurocalcin delta	map04740 Olfactory transduction			GO:0005488 binding; GO:0005509 calcium ion binding; GO:0043167 ion binding; GO:0043169 cation binding; GO:0046872 metal ion binding;	PF13833; PF13499	PF13833 EF-hand domain pair; PF13499 EF-hand domain pair	T
CGIg15803	Q7ZVK3 SIR2_DANRE NAD-dependent protein deacetylase sirtuin-2 OS=Danio rerio OX=7955 GN=sirt2 PE=1 SV=1	sirt2	0.660764	0.00239506	1.01734	0.599281	1.48523	0.00328124	1.03663	0.358633	Up	41.8029	4.6	2	1	26670.5	22514.8	26263.9	36317.8	37858.5	40008.5	37190.8	35310.7	39557.5	37873	39703.9	38587.2	0.6382	0.538758	0.62847	0.86905	0.905918	0.957365	0.889942	0.844951	0.946574	0.906266	0.950078	0.923355	cytoplasm	K11412	SIRT2, SIR2L2; NAD+-dependent protein deacetylase sirtuin 2 [EC:2.3.1.286]	map00760 Nicotinate and nicotinamide metabolism; map01100 Metabolic pathways	GO:0006325 chromatin organization; GO:0006476 protein deacetylation; GO:0006807 nitrogen compound metabolic process; GO:0006996 organelle organization; GO:0007275 multicellular organism development; GO:0008152 metabolic process; GO:0008340 determination of adult lifespan; GO:0009987 cellular process; GO:0016043 cellular component organization; GO:0016570 histone modification; GO:0016575 histone d…	GO:0005622 intracellular anatomical structure; GO:0005634 nucleus; GO:0005737 cytoplasm; GO:0043226 organelle; GO:0043227 membrane-bounded organelle; GO:0043229 intracellular organelle; GO:0043231 intracellular membrane-bounded organelle;	GO:0003824 catalytic activity; GO:0004407 histone deacetylase activity; GO:0016787 hydrolase activity; GO:0016810 hydrolase activity, acting on carbon-nitrogen (but not peptide) bonds; GO:0016811 hydrolase activity, acting on carbon-nitrogen (but not peptide) bonds, in linear amides; GO:0017136 NAD-dependent histone deacetylase activity; GO:0019213 deacetylase activity; GO:0033558 protein lysine …			BK
CGIg20417	P10155 RO60_HUMAN RNA-binding protein RO60 OS=Homo sapiens OX=9606 GN=RO60 PE=1 SV=2	RO60	0.376862	0.00239379	0.965811	0.758873	1.06386	0.657819	2.40894	0.00410909	Up	67.9211	5.3	3	3	5534.51	8199.1	8063.73	16911.2	19786	21141.8	6963.01	8945.91	7280.36	15373.3	17135.5	23352.7	0.251848	0.3731	0.36694	0.769544	0.90036	0.962059	0.316851	0.407083	0.331292	0.699563	0.77975	1.06266	cytoplasm,nucleus	K11089	TROVE2, SSA2; 60 kDa SS-A/Ro ribonucleoprotein		GO:0002376 immune system process; GO:0002520 immune system development; GO:0006139 nucleobase-containing compound metabolic process; GO:0006351 DNA-templated transcription; GO:0006383 transcription by RNA polymerase III; GO:0006725 cellular aromatic compound metabolic process; GO:0006807 nitrogen compound metabolic process; GO:0006996 organelle organization; GO:0007154 cell communication; GO:0007…	GO:0005622 intracellular anatomical structure; GO:0005634 nucleus; GO:0005654 nucleoplasm; GO:0005737 cytoplasm; GO:0005829 cytosol; GO:0031974 membrane-enclosed lumen; GO:0031981 nuclear lumen; GO:0032991 protein-containing complex; GO:0043226 organelle; GO:0043227 membrane-bounded organelle; GO:0043229 intracellular organelle; GO:0043231 intracellular membrane-bounded organelle; GO:0043233 orga…	GO:0003676 nucleic acid binding; GO:0003723 RNA binding; GO:0005488 binding; GO:0017069 snRNA binding; GO:0030620 U2 snRNA binding; GO:0034336 misfolded RNA binding; GO:0097159 organic cyclic compound binding; GO:1901363 heterocyclic compound binding;	PF05731	PF05731 TROVE domain	S
CGIg13629	XP_011428596.2 uncharacterized protein LOC105329122 [Crassostrea gigas]	--	0.460272	0.00236115	0.824442	0.000659778	1.08476	0.65833	1.65125	0.0131242	Up	15.3764	17.6	2	2	5744.91	4797.32	7107.68	12749.6	13179.4	12417.7	5711.41	5440.27	7994.23	10365.5	10741.1	10508	0.499405	0.417031	0.617871	1.10832	1.14569	1.07947	0.496493	0.472923	0.694938	0.901073	0.933723	0.913462	cytoplasm
CGIg07516	Q6ZWV7 RL35_MOUSE 60S ribosomal protein L35 OS=Mus musculus OX=10090 GN=Rpl35 PE=1 SV=1	Rpl35	0.590439	0.00235207	1.06695	0.259713	1.6536	0.00617325	1.09279	0.290361	Up	16.9363	7	1	1	19468.2	16452.5	21436.3	32762.2	32131.3	32249.3	29087.7	35146.3	30611.2	36495.6	31379.6	35771.1	0.789994	0.667619	0.869856	1.32945	1.30385	1.30863	1.18034	1.42619	1.24216	1.48094	1.27334	1.45154	cytoplasm	K02918	RP-L35e, RPL35; large subunit ribosomal protein L35e	map03010 Ribosome	GO:0000184 nuclear-transcribed mRNA catabolic process, nonsense-mediated decay; GO:0000463 maturation of LSU-rRNA from tricistronic rRNA transcript (SSU-rRNA, 5.8S rRNA, LSU-rRNA); GO:0000470 maturation of LSU-rRNA; GO:0000956 nuclear-transcribed mRNA catabolic process; GO:0002262 myeloid cell homeostasis; GO:0002376 immune system process; GO:0002520 immune system development; GO:0006139 nucleoba…	GO:0005622 intracellular anatomical structure; GO:0005634 nucleus; GO:0005730 nucleolus; GO:0005737 cytoplasm; GO:0005783 endoplasmic reticulum; GO:0005789 endoplasmic reticulum membrane; GO:0005791 rough endoplasmic reticulum; GO:0005829 cytosol; GO:0005840 ribosome; GO:0012505 endomembrane system; GO:0015934 large ribosomal subunit; GO:0016020 membrane; GO:0022625 cytosolic large ribosomal subu…	GO:0003676 nucleic acid binding; GO:0003723 RNA binding; GO:0003729 mRNA binding; GO:0003735 structural constituent of ribosome; GO:0005198 structural molecule activity; GO:0005488 binding; GO:0097159 organic cyclic compound binding; GO:1901363 heterocyclic compound binding;			J
CGIg26969	XP_034309780.1 uncharacterized protein LOC105338180 [Crassostrea gigas]	--	0.641591	0.00232866	0.635657	0.00020827	1.27267	0.0759225	0.778482	0.0434524	Up	21.8578	15.5	3	3	6561.31	7857.63	7912.92	11929	11755.4	11122.5	8353.67	9132.34	10935.1	7030.25	7350.87	7744.2	0.617526	0.73953	0.744734	1.12272	1.10638	1.04681	0.786215	0.859501	1.02917	0.661661	0.691836	0.728854	extracellular
CGIg18255	B2GV71 NDUF5_RAT Arginine-hydroxylase NDUFAF5, mitochondrial OS=Rattus norvegicus OX=10116 GN=Ndufaf5 PE=2 SV=1	Ndufaf5	0.537643	0.0023075	0.698284	0.01692	1.14116	0.527135	1.13813	0.384805	Up	41.0321	14.4	4	4	3179.79	2912.97	2906.11	6457.54	5443.63	4836.49	2754.39	4526.37	2988.39	3987.25	3658.16	4042.23	0.685915	0.628358	0.626879	1.39296	1.17425	1.04328	0.59415	0.976385	0.644627	0.860092	0.789103	0.871951	nucleus	K18162	NDUFAF5; NADH dehydrogenase [ubiquinone] 1 alpha subcomplex assembly factor 5 [EC:2.1.1.-]	map04714 Thermogenesis	GO:0006807 nitrogen compound metabolic process; GO:0006996 organelle organization; GO:0007005 mitochondrion organization; GO:0008152 metabolic process; GO:0009987 cellular process; GO:0010257 NADH dehydrogenase complex assembly; GO:0016043 cellular component organization; GO:0018193 peptidyl-amino acid modification; GO:0018195 peptidyl-arginine modification; GO:0019538 protein metabolic process; …	GO:0005622 intracellular anatomical structure; GO:0005737 cytoplasm; GO:0005739 mitochondrion; GO:0005740 mitochondrial envelope; GO:0005743 mitochondrial inner membrane; GO:0016020 membrane; GO:0019866 organelle inner membrane; GO:0019898 extrinsic component of membrane; GO:0031090 organelle membrane; GO:0031312 extrinsic component of organelle membrane; GO:0031314 extrinsic component of mitocho…		PF08241	PF08241 Methyltransferase domain	R
CGIg03554	A0A0R4IBK5 R213A_DANRE E3 ubiquitin-protein ligase rnf213-alpha OS=Danio rerio OX=7955 GN=rnf213a PE=3 SV=1	rnf213a	0.59987	0.00228246	0.52642	0.0213874	1.40201	0.00733694	0.625929	0.0507513	Up	622.898	0.6	3	3	7783.6	7099.57	8460.01	12805.5	11850.3	14257.9	10574.9	10274.2	11878.2	8634.05	7074.1	4776.83	0.816764	0.744985	0.887742	1.34373	1.2435	1.49614	1.10967	1.07811	1.24643	0.906004	0.742313	0.501251	plasma membrane	K22754	RNF213; E3 ubiquitin-protein ligase RNF213 [EC:2.3.2.27]
CGIg01292	D3YXG0 HMCN1_MOUSE Hemicentin-1 OS=Mus musculus OX=10090 GN=Hmcn1 PE=1 SV=1	Hmcn1	0.600605	0.0022796	0.192462	0.120224	3.16344	0.000102053	0.101297	0.0861199	Up	88.4817	1.5	1	1	3141.21	3122.19	2737.41	4871.09	4559.61	5555.56	10644.4	8844.83	8984.39	639.723	1283.13		0.455438	0.45268	0.396892	0.706249	0.661088	0.805489	1.5433	1.28239	1.30263	0.0927521	0.186039		cytoplasm				GO:0000003 reproduction; GO:0000132 establishment of mitotic spindle orientation; GO:0000226 microtubule cytoskeleton organization; GO:0000278 mitotic cell cycle; GO:0000902 cell morphogenesis; GO:0001101 response to acid chemical; GO:0001501 skeletal system development; GO:0001508 action potential; GO:0001525 angiogenesis; GO:0001558 regulation of cell growth; GO:0001568 blood vessel development…	GO:0005622 intracellular anatomical structure; GO:0005737 cytoplasm; GO:0005768 endosome; GO:0005886 plasma membrane; GO:0005902 microvillus; GO:0005911 cell-cell junction; GO:0005912 adherens junction; GO:0005918 septate junction; GO:0005919 pleated septate junction; GO:0009897 external side of plasma membrane; GO:0009986 cell surface; GO:0012505 endomembrane system; GO:0012506 vesicle membrane;…	GO:0002020 protease binding; GO:0005102 signaling receptor binding; GO:0005178 integrin binding; GO:0005488 binding; GO:0005509 calcium ion binding; GO:0005515 protein binding; GO:0008092 cytoskeletal protein binding; GO:0019899 enzyme binding; GO:0019904 protein domain specific binding; GO:0030165 PDZ domain binding; GO:0030246 carbohydrate binding; GO:0030247 polysaccharide binding; GO:0030506 …	PF18738; PF07679; PF13927	PF18738 DZIP3/ hRUL138-like HEPN; PF07679 Immunoglobulin I-set domain; PF13927 Immunoglobulin domain	T
CGIg15964	Q9CQX8 KGD4_MOUSE Alpha-ketoglutarate dehydrogenase component 4 OS=Mus musculus OX=10090 GN=Mrps36 PE=1 SV=1	Mrps36	0.606061	0.00226391	0.998017	0.949545	1.67744	0.00157346	0.981689	0.735494	Up	9.60812	58	4	4	4257.9	5020.97	5314.43	7810.57	8503.17	7765.19	8076.24	7996.5	8406.67	7126.32	8547.49	8357.36	0.560631	0.661104	0.699743	1.02841	1.1196	1.02243	1.06339	1.05289	1.1069	0.938313	1.12544	1.1004	mitochondria	K17414	MRPS36; small subunit ribosomal protein S36
CGIg27418	P30988 CALCR_HUMAN Calcitonin receptor OS=Homo sapiens OX=9606 GN=CALCR PE=1 SV=3	CALCR	0.431417	0.00225582	0.918823	0.161878	1.55108	0.0315101	1.37309	0.0129404	Up	46.9791	5.1	2	2	2327.09	1980.89		5455.25	4877.17	4646.04	3067.28	3860.57	3095.2	4627.88	4615.02	4519.66	0.522361	0.444649		1.22454	1.09478	1.0429	0.688512	0.866582	0.694779	1.03882	1.03593	1.01453	plasma membrane	K04576	CALCR; calcitonin receptor	map04080 Neuroactive ligand-receptor interaction; map04380 Osteoclast differentiation	GO:0000003 reproduction; GO:0001525 angiogenesis; GO:0001568 blood vessel development; GO:0001756 somitogenesis; GO:0001932 regulation of protein phosphorylation; GO:0001934 positive regulation of protein phosphorylation; GO:0001944 vasculature development; GO:0002376 immune system process; GO:0002520 immune system development; GO:0002521 leukocyte differentiation; GO:0002573 myeloid leukocyte di…	GO:0000323 lytic vacuole; GO:0001669 acrosomal vesicle; GO:0005622 intracellular anatomical structure; GO:0005737 cytoplasm; GO:0005764 lysosome; GO:0005768 endosome; GO:0005773 vacuole; GO:0005783 endoplasmic reticulum; GO:0005886 plasma membrane; GO:0005929 cilium; GO:0012505 endomembrane system; GO:0016020 membrane; GO:0030141 secretory granule; GO:0030424 axon; GO:0031410 cytoplasmic vesicle;…	GO:0001605 adrenomedullin receptor activity; GO:0001635 calcitonin gene-related peptide receptor activity; GO:0001653 peptide receptor activity; GO:0004888 transmembrane signaling receptor activity; GO:0004930 G protein-coupled receptor activity; GO:0004948 calcitonin receptor activity; GO:0005215 transporter activity; GO:0005488 binding; GO:0008036 diuretic hormone receptor activity; GO:0008188 …			T
CGIg00428	XP_034320191.1 uncharacterized protein LOC105329382 isoform X1 [Crassostrea gigas]	--	0.516165	0.00213799	1.25066	0.0943079	1.04456	0.43761	2.31963	0.000262656	Up	50.1399	11.8	6	6	7192.81	8224.57	8201.48	15875.1	16964.7	12918.6	7783.17	8399.12	8489	19420.4	20937.2	16870.6	0.635153	0.726262	0.724222	1.40183	1.49805	1.14076	0.687284	0.741675	0.749612	1.7149	1.84883	1.48974	nucleus
CGIg05024	Q6PBK1 MIX23_DANRE Protein MIX23 OS=Danio rerio OX=7955 GN=mix23 PE=2 SV=2	mix23	0.202505	0.00202636	0.347701	0.00247813	2.86874	0.00857809	0.59852	0.027306	Up	17.6462	6.6	1	1	9796.41	8171.97	4581.02	35828.9	38554.9	36968.5	21566.6	21613.7	21508.2	14709.2	9192.16	14816	0.381128	0.31793	0.178224	1.39392	1.49998	1.43825	0.839044	0.840877	0.836774	0.572258	0.35762	0.576415	cytoplasm					GO:0005622 intracellular anatomical structure; GO:0005737 cytoplasm; GO:0005739 mitochondrion; GO:0043226 organelle; GO:0043227 membrane-bounded organelle; GO:0043229 intracellular organelle; GO:0043231 intracellular membrane-bounded organelle;				RD
CGIg09501	P20594 ANPRB_HUMAN Atrial natriuretic peptide receptor 2 OS=Homo sapiens OX=9606 GN=NPR2 PE=1 SV=1	NPR2	0.251084	0.00197672	0.115527	0.0888517	0.973383	0.912565	0.472695	0.28936	Up	130.462	0.6	1	1	697.793	462.526	812.327	2134.43	2849.51	2872.58	797.171	447.644	675.326	6.58435	445.204	455.853	0.788622	0.522731	0.918064	2.41226	3.22042	3.2465	0.900935	0.505912	0.76323	0.00744141	0.503154	0.51519	plasma membrane	K12324	ANPRB, NPR2; atrial natriuretic peptide receptor B [EC:4.6.1.2]	map00230 Purine metabolism; map01100 Metabolic pathways; map04022 cGMP-PKG signaling pathway; map04270 Vascular smooth muscle contraction; map04921 Oxytocin signaling pathway				PF07714; PF00211	PF07714 Protein tyrosine and serine/threonine kinase; PF00211 Adenylate and Guanylate cyclase catalytic domain	T
CGIg09889	XP_034298927.1 uncharacterized protein LOC105342487 isoform X1 [Crassostrea gigas]	--	0.512463	0.00194729	0.447897	0.00114242	0.580239	0.0175005	1.50629	0.0447536	Up	32.7231	13.8	4	4	4787.19	3619.33	4225.15	8842.14	7539.53	8267.25	1943.27	2887.47	2498.64	3322.92	3384.45	4332.81	0.872056	0.659314	0.769672	1.61073	1.37344	1.506	0.353995	0.525996	0.455165	0.605318	0.616527	0.789285	extracellular
CGIg23951	Q9UPZ3 HPS5_HUMAN Hermansky-Pudlak syndrome 5 protein OS=Homo sapiens OX=9606 GN=HPS5 PE=1 SV=2	HPS5	0.403216	0.00194335	0.47095	0.145456	2.2043	0.00427625	0.529867	0.189681	Up	186.844	1.2	1	1	10179.2	13456.4	15632.2	33922.7	31508.2	31955.7	28574.8	31760.9	26222.3	22830.9	18974.1	4059.2	0.460517	0.608782	0.707219	1.5347	1.42546	1.44571	1.29275	1.4369	1.18633	1.03289	0.858409	0.183642	cytoplasm	K20191	HPS5; Hermansky-Pudlak syndrome 5 protein		GO:0006605 protein targeting; GO:0006622 protein targeting to lysosome; GO:0006623 protein targeting to vacuole; GO:0006725 cellular aromatic compound metabolic process; GO:0006726 eye pigment biosynthetic process; GO:0006727 ommochrome biosynthetic process; GO:0006810 transport; GO:0006886 intracellular protein transport; GO:0006950 response to stress; GO:0006996 organelle organization; GO:00070…	GO:0005622 intracellular anatomical structure; GO:0005737 cytoplasm; GO:0005829 cytosol; GO:0031082 BLOC complex; GO:0031084 BLOC-2 complex; GO:0032991 protein-containing complex;				R
CGIg25891	D8VNS7 FCNV1_CERRY Ryncolin-1 OS=Cerberus rynchops OX=46267 PE=1 SV=1	--	0.504316	0.00192124	0.933087	0.507702	1.37329	0.0805711	1.34728	0.0890962	Up	45.7594	8.4	2	1	4259.26	3899.85	3314.22	8069.19	6707.89	7973.21	4967.36	6401.25	4387.62	7838.95	7355.57	6033.48	0.74641	0.683425	0.580798	1.41408	1.17552	1.39726	0.870501	1.12178	0.768906	1.37373	1.28902	1.05733	plasma membrane	K10104	FCN; ficolin					PF00147	PF00147 Fibrinogen beta and gamma chains, C-terminal globular domain	R
CGIg23943	Q5UQ35 YR811_MIMIV Putative ariadne-like RING finger protein R811 OS=Acanthamoeba polyphaga mimivirus OX=212035 GN=MIMI_R811 PE=4 SV=1	MIMI_R811	0.342903	0.00188718	0.770677	0.159223	1.27003	0.279519	1.76965	0.0384198	Up	35.1088	12.8	3	2	3918.68	2766.78	2812.65	7672.8	10598.1	9428.22	3851.51	5119.03	3092.34	7349.12	8427.88	5570.07	0.505114	0.356635	0.362547	0.989016	1.36608	1.21529	0.496456	0.659838	0.3986	0.947294	1.08635	0.717977	cytoplasm							PF00092	PF00092 von Willebrand factor type A domain
CGIg04356	P42577 FRIS_LYMST Soma ferritin OS=Lymnaea stagnalis OX=6523 PE=2 SV=2	--	0.439458	0.00187949	0.3732	5.83083e-05	1.30407	0.0691325	0.651214	0.00107953	Up	19.9183	31.6	4	4	92029.2	128793	127539	279033	260984	252690	151428	146260	156599	106782	90714.6	98342.2	0.559909	0.783582	0.775952	1.69765	1.58784	1.53738	0.921293	0.889853	0.952755	0.649664	0.551911	0.598318	cytoplasm	K00522	FTH1; ferritin heavy chain [EC:1.16.3.2]	map04216 Ferroptosis; map04217 Necroptosis; map04978 Mineral absorption	GO:0000041 transition metal ion transport; GO:0001775 cell activation; GO:0002252 immune effector process; GO:0002263 cell activation involved in immune response; GO:0002274 myeloid leukocyte activation; GO:0002275 myeloid cell activation involved in immune response; GO:0002283 neutrophil activation involved in immune response; GO:0002366 leukocyte activation involved in immune response; GO:00023…	GO:0000323 lytic vacuole; GO:0005576 extracellular region; GO:0005622 intracellular anatomical structure; GO:0005737 cytoplasm; GO:0005764 lysosome; GO:0005767 secondary lysosome; GO:0005773 vacuole; GO:0005776 autophagosome; GO:0005829 cytosol; GO:0008043 intracellular ferritin complex; GO:0012505 endomembrane system; GO:0030139 endocytic vesicle; GO:0030141 secretory granule; GO:0031410 cytopla…	GO:0005488 binding; GO:0005506 iron ion binding; GO:0043167 ion binding; GO:0043169 cation binding; GO:0046872 metal ion binding; GO:0046914 transition metal ion binding;	PF00210	PF00210 Ferritin-like domain	P
CGIg17509	XP_034325225.1 39S ribosomal protein L49, mitochondrial [Crassostrea gigas]	--	0.444497	0.00186064	0.357515	0.00432612	1.87213	0.0102218	0.429624	0.0119528	Up	20.831	5.6	1	1	1084.65	1181.04	818.884	2228.62	2388.11	2322.73	2075.28	2079.16	1620.28	984.495	559.564	936.901	0.574914	0.626003	0.434046	1.18127	1.26581	1.23115	1.09999	1.10205	0.858825	0.521827	0.296594	0.4966	mitochondria	K17430	MRPL49, NOF1; large subunit ribosomal protein L49		GO:0006412 translation; GO:0006414 translational elongation; GO:0006415 translational termination; GO:0006518 peptide metabolic process; GO:0006807 nitrogen compound metabolic process; GO:0008152 metabolic process; GO:0009058 biosynthetic process; GO:0009059 macromolecule biosynthetic process; GO:0009987 cellular process; GO:0010467 gene expression; GO:0016043 cellular component organization; GO:…	GO:0000313 organellar ribosome; GO:0000315 organellar large ribosomal subunit; GO:0005622 intracellular anatomical structure; GO:0005737 cytoplasm; GO:0005739 mitochondrion; GO:0005740 mitochondrial envelope; GO:0005743 mitochondrial inner membrane; GO:0005759 mitochondrial matrix; GO:0005761 mitochondrial ribosome; GO:0005762 mitochondrial large ribosomal subunit; GO:0005840 ribosome; GO:0015934…	GO:0003735 structural constituent of ribosome; GO:0005198 structural molecule activity;	PF05046	PF05046 Mitochondrial large subunit ribosomal protein (Img2)	S
CGIg17811	Q9QXT0 CNPY2_MOUSE Protein canopy homolog 2 OS=Mus musculus OX=10090 GN=Cnpy2 PE=1 SV=1	Cnpy2	0.569656	0.00185646	0.848927	0.0447083	1.21738	0.287663	1.22414	0.194003	Up	25.5425	11.2	2	2	10633.7	9441.77	11770.1	17045.2	19411.9	19445.9	14619.2	14461	9688.06	15417.3	15083	16957.4	0.607291	0.539222	0.672191	0.973454	1.10862	1.11056	0.834905	0.825869	0.553287	0.880483	0.861392	0.968439	extracellular	K22936	CNPY1_2; protein canopy 1/2		GO:0002791 regulation of peptide secretion; GO:0003002 regionalization; GO:0006457 protein folding; GO:0007154 cell communication; GO:0007165 signal transduction; GO:0007166 cell surface receptor signaling pathway; GO:0007167 enzyme-linked receptor protein signaling pathway; GO:0007275 multicellular organism development; GO:0007389 pattern specification process; GO:0009798 axis specification; GO:…	GO:0005622 intracellular anatomical structure; GO:0005737 cytoplasm; GO:0005783 endoplasmic reticulum; GO:0012505 endomembrane system; GO:0043226 organelle; GO:0043227 membrane-bounded organelle; GO:0043229 intracellular organelle; GO:0043231 intracellular membrane-bounded organelle;	GO:0005488 binding; GO:0005515 protein binding; GO:0051087 protein-folding chaperone binding;			R
CGIg05791	XP_034303210.1 uncharacterized protein LOC105344861 isoform X1 [Crassostrea gigas]	--	0.642565	0.00184657	1.04402	0.443304	1.18018	0.135464	1.37672	0.0160765	Up	46.3206	10.4	4	4	19927.2	22483.3	20873.4	30762.8	31662.5	36061	28422.5	24615.1	21648.5	33354.8	35675.2	33791.5	0.530996	0.599109	0.55621	0.819731	0.843706	0.960912	0.75737	0.655915	0.576864	0.888802	0.950632	0.900438	cytoplasm
CGIg02356	Q6INN8 SAMH1_XENLA Deoxynucleoside triphosphate triphosphohydrolase SAMHD1 OS=Xenopus laevis OX=8355 GN=samhd1 PE=1 SV=2	samhd1	0.605908	0.0018324	0.433869	0.000160458	1.40682	0.0227066	0.508997	0.00162758	Up	56.4723	16.1	8	7	113247	97693.1	121271	176195	191870	180221	156671	173967	136722	75107.5	74519	88258.2	0.81488	0.702961	0.87262	1.26783	1.38062	1.2968	1.12734	1.2518	0.9838	0.540444	0.536209	0.635072	cytoplasm,nucleus	K22544	SAMHD1; deoxynucleoside triphosphate triphosphohydrolase SAMHD1 [EC:3.1.5.-]		GO:0002252 immune effector process; GO:0002376 immune system process; GO:0002682 regulation of immune system process; GO:0006139 nucleobase-containing compound metabolic process; GO:0006163 purine nucleotide metabolic process; GO:0006195 purine nucleotide catabolic process; GO:0006203 dGTP catabolic process; GO:0006725 cellular aromatic compound metabolic process; GO:0006753 nucleoside phosphate …	GO:0005622 intracellular anatomical structure; GO:0005634 nucleus; GO:0005654 nucleoplasm; GO:0005886 plasma membrane; GO:0016020 membrane; GO:0031974 membrane-enclosed lumen; GO:0031981 nuclear lumen; GO:0043226 organelle; GO:0043227 membrane-bounded organelle; GO:0043229 intracellular organelle; GO:0043231 intracellular membrane-bounded organelle; GO:0043233 organelle lumen; GO:0070013 intracel…	GO:0000166 nucleotide binding; GO:0003676 nucleic acid binding; GO:0003723 RNA binding; GO:0003824 catalytic activity; GO:0004518 nuclease activity; GO:0004540 RNA nuclease activity; GO:0005488 binding; GO:0005515 protein binding; GO:0008270 zinc ion binding; GO:0008832 dGTPase activity; GO:0016787 hydrolase activity; GO:0016788 hydrolase activity, acting on ester bonds; GO:0016793 triphosphoric …			S
CGIg23678	P81113 SLA3_TRIAB Snaclec alboaggregin-A subunit beta OS=Trimeresurus albolabris OX=8765 PE=1 SV=1	--	0.463078	0.00178167	1.87295	0.000220739	2.90151	0.000441143	1.39396	0.0011054	Up	20.9486	22.5	4	4	64963.1	88061.4	86698.8	173319	182802	161552	232901	239310	223347	317531	344644	307404	0.253805	0.344048	0.338724	0.677144	0.714192	0.631168	0.909925	0.934963	0.872598	1.24056	1.34649	1.201	extracellular	K10063	ASGR1; asialoglycoprotein receptor 1	map04918 Thyroid hormone synthesis				PF00059	PF00059 Lectin C-type domain	TV
CGIg22771	Q3ZBT5 STX7_BOVIN Syntaxin-7 OS=Bos taurus OX=9913 GN=STX7 PE=2 SV=1	STX7	0.515995	0.00177779	0.69515	0.00769603	1.72013	0.00214027	0.783198	0.0130465	Up	31.9383	6.8	2	2	8021.46	7381.93	9291.26	17252.7	14172.7	16432.8	14793.2	14584.8	13099.9	12004	10881.8	10382.8	0.508566	0.468019	0.589072	1.09384	0.89856	1.04185	0.937901	0.924688	0.83054	0.761063	0.689915	0.658276	plasma membrane	K13814	TSNARE1; t-SNARE domain-containing protein 1		GO:0000003 reproduction; GO:0000278 mitotic cell cycle; GO:0000280 nuclear division; GO:0006810 transport; GO:0006836 neurotransmitter transport; GO:0006886 intracellular protein transport; GO:0006887 exocytosis; GO:0006904 vesicle docking involved in exocytosis; GO:0006906 vesicle fusion; GO:0006996 organelle organization; GO:0007049 cell cycle; GO:0007140 male meiotic nuclear division; GO:00071…	GO:0005622 intracellular anatomical structure; GO:0005737 cytoplasm; GO:0005886 plasma membrane; GO:0012505 endomembrane system; GO:0016020 membrane; GO:0031201 SNARE complex; GO:0032991 protein-containing complex; GO:0071944 cell periphery; GO:0098796 membrane protein complex;	GO:0000149 SNARE binding; GO:0005484 SNAP receptor activity; GO:0005488 binding; GO:0005515 protein binding;	PF14523	PF14523 Syntaxin-like protein	U
CGIg16924	A0A096MJZ0 DNAL1_RAT Dynein axonemal light chain 1 OS=Rattus norvegicus OX=10116 GN=Dnal1 PE=1 SV=1	Dnal1	0.607489	0.00177777	0.583163	0.00319153	0.722295	0.0280457	1.32904	0.0611337	Up	21.3477	10.4	2	2	33378.3	32174.3	29816.6	58396.1	48120.8	50472.5	24241	25679.5	18964.2	31845.8	26871.8	32832.7	0.702821	0.677468	0.627824	1.2296	1.01324	1.06276	0.510423	0.540712	0.399315	0.670552	0.565819	0.691331	cytoplasm	K10411	DNAL1; dynein axonemal light chain 1		GO:0000226 microtubule cytoskeleton organization; GO:0001578 microtubule bundle formation; GO:0006996 organelle organization; GO:0007010 cytoskeleton organization; GO:0007017 microtubule-based process; GO:0009987 cellular process; GO:0016043 cellular component organization; GO:0022607 cellular component assembly; GO:0030030 cell projection organization; GO:0030031 cell projection assembly; GO:003…	GO:0005622 intracellular anatomical structure; GO:0005737 cytoplasm; GO:0005856 cytoskeleton; GO:0005858 axonemal dynein complex; GO:0005875 microtubule associated complex; GO:0005929 cilium; GO:0005930 axoneme; GO:0015630 microtubule cytoskeleton; GO:0030286 dynein complex; GO:0032838 plasma membrane bounded cell projection cytoplasm; GO:0032991 protein-containing complex; GO:0036157 outer dynei…	GO:0005488 binding; GO:0005515 protein binding; GO:0008092 cytoskeletal protein binding; GO:0015631 tubulin binding; GO:0043014 alpha-tubulin binding; GO:0045504 dynein heavy chain binding;			T
CGIg03717	Q9JHG6 RCAN1_MOUSE Calcipressin-1 OS=Mus musculus OX=10090 GN=Rcan1 PE=1 SV=2	Rcan1	0.64424	0.00170858	0.972207	0.754661	1.5926	3.4128e-05	0.947554	0.456104	Up	25.3063	19.3	3	3	4666.83	4386.02	4522.26	6655.86	7824.12	6591.54	7411.54	7112.86	7095.32	7083.26	7467.17	5935.43	0.677198	0.636451	0.656221	0.965825	1.13535	0.956492	1.07548	1.03214	1.0296	1.02784	1.08355	0.861285	cytoplasm	K17903	RCAN2, ZAKI4; calcipressin-2	map04919 Thyroid hormone signaling pathway	GO:0003008 system process; GO:0006950 response to stress; GO:0006979 response to oxidative stress; GO:0007154 cell communication; GO:0007165 signal transduction; GO:0007166 cell surface receptor signaling pathway; GO:0007219 Notch signaling pathway; GO:0007610 behavior; GO:0007611 learning or memory; GO:0007613 memory; GO:0007614 short-term memory; GO:0007626 locomotory behavior; GO:0009966 regul…	GO:0005622 intracellular anatomical structure; GO:0005737 cytoplasm;	GO:0008597 calcium-dependent protein serine/threonine phosphatase regulator activity; GO:0019208 phosphatase regulator activity; GO:0019888 protein phosphatase regulator activity; GO:0030234 enzyme regulator activity; GO:0098772 molecular function regulator activity;			TR
CGIg12970	XP_011413852.2 uncharacterized protein LOC105318426 isoform X1 [Crassostrea gigas]	--	0.473953	0.00170393	0.964015	0.566922	0.681933	0.0226906	2.98268	7.02483e-05	Up	36.6587	9.7	3	2	10562.5	8279.9	7930.16	19929.7	19411.9	17146.3	5715.97	6771.93	5769.23	17083.7	19181.4	18190	0.545866	0.4279	0.409826	1.02995	1.0032	0.886113	0.295398	0.349969	0.29815	0.882874	0.991286	0.940051	cytoplasm	K02832	RAIDD; CASP2 and RIPK1 domain containing adaptor with death domain					PF00619; PF00531	PF00619 Caspase recruitment domain; PF00531 Death domain
CGIg03600	XP_011420055.2 uncharacterized protein LOC105322851 [Crassostrea gigas]	--	0.65717	0.00167591	0.683029	0.00118775	1.47837	0.00143125	0.703036	0.000825651	Up	25.7406	22.2	5	4	28240.2	24922.5	23954.4	39191.6	40846.4	37309.2	37699.4	38589.4	37718.9	25128.7	26370.4	28652.3	0.865936	0.764205	0.734521	1.20174	1.25248	1.14402	1.15599	1.18328	1.15658	0.770529	0.808604	0.878572	extracellular
CGIg09660	O88630 GOSR1_MOUSE Golgi SNAP receptor complex member 1 OS=Mus musculus OX=10090 GN=Gosr1 PE=1 SV=2	Gosr1	0.569065	0.00166817	0.587818	0.000465894	1.2135	0.05382	0.851215	0.0261775	Up	27.7334	16.7	5	5	12419.3	12265.3	15040.2	22930.7	21992.5	24883.8	15305	17004.5	15896.7	14051.7	12735.5	14246.6	0.557565	0.550649	0.675232	1.02948	0.987355	1.11716	0.687119	0.763419	0.713682	0.630854	0.571762	0.639601	cytoplasm	K08495	GOSR1, GOS1; golgi SNAP receptor complex member 1	map04130 SNARE interactions in vesicular transport	GO:0006810 transport; GO:0006888 endoplasmic reticulum to Golgi vesicle-mediated transport; GO:0006891 intra-Golgi vesicle-mediated transport; GO:0006906 vesicle fusion; GO:0006996 organelle organization; GO:0009987 cellular process; GO:0016043 cellular component organization; GO:0016050 vesicle organization; GO:0016192 vesicle-mediated transport; GO:0016197 endosomal transport; GO:0016482 cytoso…	GO:0000138 Golgi trans cisterna; GO:0000139 Golgi membrane; GO:0005622 intracellular anatomical structure; GO:0005737 cytoplasm; GO:0005794 Golgi apparatus; GO:0005795 Golgi stack; GO:0005797 Golgi medial cisterna; GO:0005801 cis-Golgi network; GO:0012505 endomembrane system; GO:0016020 membrane; GO:0030133 transport vesicle; GO:0031090 organelle membrane; GO:0031201 SNARE complex; GO:0031410 cyt…	GO:0000149 SNARE binding; GO:0005484 SNAP receptor activity; GO:0005488 binding; GO:0005515 protein binding;	PF12352	PF12352 Snare region anchored in the vesicle membrane C-terminus	U
CGIg10229	Q13948 CASP_HUMAN Protein CASP OS=Homo sapiens OX=9606 GN=CUX1 PE=1 SV=2	CUX1	0.659473	0.0016633	0.883529	0.00641145	1.39767	0.00529168	0.958556	0.293458	Up	32.8954	20.1	6	6	3923.35	4695.05	4517.66	6497.51	6697.93	6723.58	5853.98	6435.41	6070.54	5625.18	5944.63	6029.22	0.687354	0.822551	0.791474	1.13833	1.17345	1.17794	1.02559	1.12746	1.06353	0.985507	1.04147	1.05629	cytoplasm	K09313	CUTL; homeobox protein cut-like							K
CGIg06303	XP_034301186.1 uncharacterized protein LOC105326615 isoform X1 [Crassostrea gigas]	--	0.286489	0.00166077	0.996429	0.952762	1.65718	0.0243423	2.09879	0.00281097	Up	90.9192	9	7	7	2727.29	1917.69	3122.31	7592.82	9797.71	9721.47	4363.5	4480.5	4027.78	8114.48	11013.4	7887.29	0.380028	0.267217	0.435072	1.05801	1.36524	1.35462	0.608022	0.624325	0.561242	1.13069	1.53464	1.09904	cytoplasm							PF00619	PF00619 Caspase recruitment domain
CGIg23713	P78318 IGBP1_HUMAN Immunoglobulin-binding protein 1 OS=Homo sapiens OX=9606 GN=IGBP1 PE=1 SV=1	IGBP1	0.616347	0.00163564	0.911664	0.0899184	1.59582	0.000897877	0.926886	0.0182206	Up	40.0653	14.1	5	5	9145.22	10211.7	8519.36	14045.8	15282.5	15899.9	14982.9	14661.5	14841	13256.7	13851.7	14124.6	0.675617	0.754405	0.629381	1.03765	1.12902	1.17463	1.10689	1.08314	1.0964	0.979359	1.02331	1.04348	cytoplasm	K17606	IGBP1, TAP42; immunoglobulin-binding protein 1	map04136 Autophagy - other; map04140 Autophagy - animal	GO:0000122 negative regulation of transcription by RNA polymerase II; GO:0000226 microtubule cytoskeleton organization; GO:0000278 mitotic cell cycle; GO:0001932 regulation of protein phosphorylation; GO:0001933 negative regulation of protein phosphorylation; GO:0002009 morphogenesis of an epithelium; GO:0002165 instar larval or pupal development; GO:0006355 regulation of DNA-templated transcript…	GO:0000159 protein phosphatase type 2A complex; GO:0005622 intracellular anatomical structure; GO:0005737 cytoplasm; GO:0005829 cytosol; GO:0005856 cytoskeleton; GO:0005874 microtubule; GO:0008287 protein serine/threonine phosphatase complex; GO:0015630 microtubule cytoskeleton; GO:0032991 protein-containing complex; GO:0043226 organelle; GO:0043228 non-membrane-bounded organelle; GO:0043229 intr…	GO:0004857 enzyme inhibitor activity; GO:0004864 protein phosphatase inhibitor activity; GO:0005488 binding; GO:0005515 protein binding; GO:0019208 phosphatase regulator activity; GO:0019212 phosphatase inhibitor activity; GO:0019888 protein phosphatase regulator activity; GO:0019899 enzyme binding; GO:0019900 kinase binding; GO:0019901 protein kinase binding; GO:0019902 phosphatase binding; GO:0…			T
CGIg04210	XP_034334721.1 major egg antigen-like [Crassostrea gigas]	--	0.418653	0.00156427	0.511871	0.0030767	1.39112	0.0276104	0.878904	0.220732	Up	24.2035	37.1	9	5	3649.57	3636.34	4288.05	10972.5	8851.03	7822.17	6241.07	4823.9	5035.82	4920.97	4783.23	4446.84	0.339179	0.33795	0.398518	1.01975	0.822587	0.726968	0.580025	0.448318	0.468013	0.457339	0.444538	0.413275	cytoplasm	K04455	HSPB1; heat shock protein beta-1	map04010 MAPK signaling pathway; map04370 VEGF signaling pathway	GO:0000302 response to reactive oxygen species; GO:0000902 cell morphogenesis; GO:0001558 regulation of cell growth; GO:0001654 eye development; GO:0001666 response to hypoxia; GO:0001932 regulation of protein phosphorylation; GO:0001934 positive regulation of protein phosphorylation; GO:0002064 epithelial cell development; GO:0002088 lens development in camera-type eye; GO:0002089 lens morphogen…	GO:0005576 extracellular region; GO:0005615 extracellular space; GO:0005622 intracellular anatomical structure; GO:0005634 nucleus; GO:0005654 nucleoplasm; GO:0005737 cytoplasm; GO:0005829 cytosol; GO:0030016 myofibril; GO:0030017 sarcomere; GO:0030018 Z disc; GO:0031674 I band; GO:0031974 membrane-enclosed lumen; GO:0031981 nuclear lumen; GO:0031982 vesicle; GO:0043226 organelle; GO:0043227 memb…	GO:0005198 structural molecule activity; GO:0005212 structural constituent of eye lens; GO:0005488 binding; GO:0005515 protein binding; GO:0042802 identical protein binding; GO:0051082 unfolded protein binding;	PF00011	PF00011 Hsp20/alpha crystallin family	O
CGIg06705	Q3T149 HSPB1_BOVIN Heat shock protein beta-1 OS=Bos taurus OX=9913 GN=HSPB1 PE=2 SV=1	HSPB1	0.535061	0.00156321	2.57272	0.000183801	5.95039	3.1337e-05	0.808062	0.0445035	Up	39.2429	13.9	6	6	8162.73	6355.88	6629.64	12757.2	13930.3	12837.5	38919.9	43037.3	43883	30348.1	33386.5	37952.2	0.250199	0.194816	0.203207	0.391026	0.426981	0.393486	1.19295	1.31915	1.34507	0.93021	1.02334	1.16329	extracellular				GO:0006457 protein folding; GO:0009987 cellular process; GO:0042026 protein refolding; GO:0061077 chaperone-mediated protein folding;	GO:0005622 intracellular anatomical structure; GO:0005737 cytoplasm; GO:0030016 myofibril; GO:0030017 sarcomere; GO:0030018 Z disc; GO:0031430 M band; GO:0031672 A band; GO:0031674 I band; GO:0043226 organelle; GO:0043228 non-membrane-bounded organelle; GO:0043229 intracellular organelle; GO:0043232 intracellular non-membrane-bounded organelle; GO:0043292 contractile fiber; GO:0055120 striated mu…	GO:0005488 binding; GO:0005515 protein binding; GO:0051082 unfolded protein binding;	PF00011	PF00011 Hsp20/alpha crystallin family	O
CGIg26845	P55211 CASP9_HUMAN Caspase-9 OS=Homo sapiens OX=9606 GN=CASP9 PE=1 SV=3	CASP9	0.228208	0.00155993	0.500967	0.0140562	3.79561	0.00325352	0.578358	0.0354644	Up	118.031	0.9	1	1	1039.9		1432.7	5276.99	5058.12	5917.22	5002.38	4003.64	5071.55	1951.67	3445.72	2744.48	0.265403		0.365654	1.34679	1.29093	1.51019	1.2767	1.02181	1.29436	0.498103	0.879414	0.700445	cytoplasm	K02186	CASP2; caspase 2 [EC:3.4.22.55]	map04210 Apoptosis	GO:0000902 cell morphogenesis; GO:0002376 immune system process; GO:0002520 immune system development; GO:0006508 proteolysis; GO:0006807 nitrogen compound metabolic process; GO:0006915 apoptotic process; GO:0006919 activation of cysteine-type endopeptidase activity involved in apoptotic process; GO:0006950 response to stress; GO:0006974 DNA damage response; GO:0007154 cell communication; GO:0007…	GO:0005622 intracellular anatomical structure; GO:0005634 nucleus; GO:0005737 cytoplasm; GO:0005739 mitochondrion; GO:0005829 cytosol; GO:0032991 protein-containing complex; GO:0043226 organelle; GO:0043227 membrane-bounded organelle; GO:0043229 intracellular organelle; GO:0043231 intracellular membrane-bounded organelle; GO:0043293 apoptosome;	GO:0003824 catalytic activity; GO:0004175 endopeptidase activity; GO:0004197 cysteine-type endopeptidase activity; GO:0005488 binding; GO:0005515 protein binding; GO:0008047 enzyme activator activity; GO:0008233 peptidase activity; GO:0008234 cysteine-type peptidase activity; GO:0016787 hydrolase activity; GO:0017124 SH3 domain binding; GO:0019899 enzyme binding; GO:0019900 kinase binding; GO:001…	PF00619	PF00619 Caspase recruitment domain	D
CGIg19473	XP_011425151.2 uncharacterized protein LOC105326687 [Crassostrea gigas]	--	0.622672	0.0015452	0.647597	0.00838718	1.22481	0.0233613	0.849134	0.128874	Up	28.3877	8.2	2	2	5077.36	4964.08	5163.48	7651.88	9146.01	7620.92	5585.21	6735.71	6302.24	5807.22	5380	4626.34	0.750403	0.733662	0.763131	1.1309	1.35173	1.12633	0.825461	0.995497	0.931433	0.858272	0.795132	0.683745	extracellular
CGIg08773	Q0P4P2 FBCD1_XENTR Fibrinogen C domain-containing protein 1 OS=Xenopus tropicalis OX=8364 GN=fibcd1 PE=2 SV=1	fibcd1	0.545755	0.0014815	2.10087	0.000177649	3.44653	3.92856e-05	1.11691	0.022896	Up	28.4431	22.5	5	5	2972.22	2971.21	2505.04	5216.91	4662.95	5600.47	10231.2	9497.14	9389.62	10884.2	11100.9	10537	0.474857	0.474695	0.400218	0.833479	0.744977	0.89476	1.63458	1.51731	1.50013	1.73892	1.77354	1.68344	extracellular	K10104	FCN; ficolin			GO:0016020 membrane;	GO:0005488 binding; GO:0008061 chitin binding; GO:0097367 carbohydrate derivative binding;	PF00147	PF00147 Fibrinogen beta and gamma chains, C-terminal globular domain	R
CGIg27562	XP_034308714.1 uncharacterized protein LOC105344146 [Crassostrea gigas]	--	0.613173	0.00144215	1.56846	0.00014277	1.55411	0.00204635	1.64592	8.12335e-05	Up	20.6856	19.8	3	3	57185.3	53022.7	65487.3	94159.4	94482.2	97893.2	91610.5	89458.6	91980.2	141481	155918	152020	0.639043	0.592526	0.731818	1.05223	1.05583	1.09395	1.02374	0.999695	1.02787	1.58104	1.74237	1.69881	extracellular
CGIg18821	Q8R3P7 CLUA1_MOUSE Clusterin-associated protein 1 OS=Mus musculus OX=10090 GN=Cluap1 PE=1 SV=1	Cluap1	0.633125	0.00143394	0.637542	0.00558161	1.27654	0.0161393	0.788832	0.0483754	Up	46.7322	20.9	8	8	16179.3	16654	17569.2	23953.7	26982.1	28673.2	22338.3	22848.4	19154.1	18083	17848.5	14822.6	0.634087	0.652692	0.688562	0.938779	1.05746	1.12374	0.87547	0.895459	0.750674	0.708696	0.699507	0.580918	cytoplasm	K19684	CLUAP1, DYF3; clusterin-associated protein 1		GO:0000226 microtubule cytoskeleton organization; GO:0001578 microtubule bundle formation; GO:0001655 urogenital system development; GO:0001822 kidney development; GO:0001838 embryonic epithelial tube formation; GO:0001841 neural tube formation; GO:0001843 neural tube closure; GO:0001894 tissue homeostasis; GO:0001895 retina homeostasis; GO:0001947 heart looping; GO:0002009 morphogenesis of an ep…	GO:0005622 intracellular anatomical structure; GO:0005634 nucleus; GO:0005654 nucleoplasm; GO:0005813 centrosome; GO:0005815 microtubule organizing center; GO:0005856 cytoskeleton; GO:0005929 cilium; GO:0015630 microtubule cytoskeleton; GO:0030424 axon; GO:0030425 dendrite; GO:0030990 intraciliary transport particle; GO:0030992 intraciliary transport particle B; GO:0031974 membrane-enclosed lumen…				R
CGIg06389	XP_034301056.1 perlucin-like protein [Crassostrea gigas]	--	0.407163	0.00141015	0.246882	6.19203e-05	0.233345	0	2.59851	0	Up	18.9096	6	1	1	9303.88	9826.85	6807.65	20716.3	20998.6	21990.2			2017.53	5094.16	6023.09	4610.42	1.16435	1.2298	0.851953	2.59258	2.6279	2.752			0.252486	0.637516	0.753768	0.576977	extracellular	K06721	CLEC10A, CLECSF13, CLECSF14, CD301; C-type lectin domain family 10 member A		GO:0001775 cell activation; GO:0001817 regulation of cytokine production; GO:0001818 negative regulation of cytokine production; GO:0001819 positive regulation of cytokine production; GO:0002218 activation of innate immune response; GO:0002220 innate immune response activating cell surface receptor signaling pathway; GO:0002223 stimulatory C-type lectin receptor signaling pathway; GO:0002252 immu…	GO:0005886 plasma membrane; GO:0016020 membrane; GO:0071944 cell periphery;	GO:0004888 transmembrane signaling receptor activity; GO:0005488 binding; GO:0005509 calcium ion binding; GO:0005537 mannose binding; GO:0030246 carbohydrate binding; GO:0036094 small molecule binding; GO:0038023 signaling receptor activity; GO:0043167 ion binding; GO:0043169 cation binding; GO:0046872 metal ion binding; GO:0048029 monosaccharide binding; GO:0060089 molecular transducer activity;	PF00059	PF00059 Lectin C-type domain	TV
CGIg22410	P12804 FGL2_MOUSE Fibroleukin OS=Mus musculus OX=10090 GN=Fgl2 PE=1 SV=1	Fgl2	0.268106	0.00139938	0.864919	0.486342	1.88601	0.00958255	1.71051	0.0399983	Up	30.067	9.6	2	2	4535.46	6189.8	6351.09	21325.9	16632.1	25734.5	10584.4	9249.13	12372.6	22311.6	13389.7	19387.6	0.234607	0.320181	0.328524	1.10313	0.860333	1.33118	0.547502	0.478432	0.639998	1.15411	0.692613	1.00287	extracellular	K10104	FCN; ficolin		GO:0001775 cell activation; GO:0002252 immune effector process; GO:0002263 cell activation involved in immune response; GO:0002274 myeloid leukocyte activation; GO:0002275 myeloid cell activation involved in immune response; GO:0002283 neutrophil activation involved in immune response; GO:0002366 leukocyte activation involved in immune response; GO:0002376 immune system process; GO:0002443 leukoc…	GO:0005576 extracellular region; GO:0005577 fibrinogen complex; GO:0005615 extracellular space; GO:0005622 intracellular anatomical structure; GO:0005737 cytoplasm; GO:0009986 cell surface; GO:0012505 endomembrane system; GO:0030141 secretory granule; GO:0031410 cytoplasmic vesicle; GO:0031974 membrane-enclosed lumen; GO:0031982 vesicle; GO:0032991 protein-containing complex; GO:0043226 organelle…	GO:0008047 enzyme activator activity; GO:0016504 peptidase activator activity; GO:0030234 enzyme regulator activity; GO:0061134 peptidase regulator activity; GO:0098772 molecular function regulator activity;	PF00147	PF00147 Fibrinogen beta and gamma chains, C-terminal globular domain	R
CGIg25365	B3EWZ3 CADN_ACRMI Coadhesin (Fragment) OS=Acropora millepora OX=45264 PE=1 SV=1	--	0.480423	0.00137676	1.12317	0.170547	1.48513	0.0176277	1.5742	0.00487452	Up	63.0471	5.5	3	2	8335.13	6845.1	9289.49	16170.7	17781.1	16981.8	12642.8	10912.3	12785.6	21496.3	17947.1	17763.9	0.492915	0.404799	0.549353	0.956289	1.05152	1.00426	0.74766	0.645319	0.756101	1.27123	1.06134	1.05051	extracellular							PF00090	PF00090 Thrombospondin type 1 domain	RP
CGIg15354	Q8BNU0 ARMC6_MOUSE Armadillo repeat-containing protein 6 OS=Mus musculus OX=10090 GN=Armc6 PE=1 SV=1	Armc6	0.660479	0.00132136	1.19615	0.0373215	0.876342	0.0128246	2.06659	6.6626e-05	Up	51.5765	17.4	6	6	12504	12115.7	12121.8	18100.5	20361.8	17166.3	10949.7	10122.9	11125.5	23445.3	21969.6	21125.4	0.824603	0.798996	0.799398	1.19368	1.3428	1.13207	0.7221	0.667579	0.733694	1.54615	1.44883	1.39316	cytoplasm	K24166	ARMC6; armadillo repeat-containing protein 6		GO:0002244 hematopoietic progenitor cell differentiation; GO:0002376 immune system process; GO:0002520 immune system development; GO:0007275 multicellular organism development; GO:0009987 cellular process; GO:0030097 hemopoiesis; GO:0030154 cell differentiation; GO:0032501 multicellular organismal process; GO:0032502 developmental process; GO:0048513 animal organ development; GO:0048534 hematopoi…	GO:0005622 intracellular anatomical structure; GO:0005737 cytoplasm; GO:0005829 cytosol;				S
CGIg13978	Q9ES30 C1QT3_MOUSE Complement C1q tumor necrosis factor-related protein 3 OS=Mus musculus OX=10090 GN=C1qtnf3 PE=2 SV=1	C1qtnf3	0.624455	0.00130579	0	0	0.115598	0	0	0	Up	20.9869	5.4	1	1	3700.21	4093.54	3965.55	6118.72	5818.98	6893.61			453.117				1.02867	1.13801	1.10243	1.70102	1.61769	1.91644			0.125967				extracellular	K23284	C1QL; C1q-related factor		GO:0001817 regulation of cytokine production; GO:0001818 negative regulation of cytokine production; GO:0001819 positive regulation of cytokine production; GO:0001932 regulation of protein phosphorylation; GO:0001934 positive regulation of protein phosphorylation; GO:0002791 regulation of peptide secretion; GO:0002792 negative regulation of peptide secretion; GO:0002793 positive regulation of pep…	GO:0005576 extracellular region; GO:0005615 extracellular space;	GO:0005488 binding; GO:0005515 protein binding; GO:0042802 identical protein binding;	PF00386	PF00386 C1q domain
CGIg11051	Q9CR24 NUDT8_MOUSE Mitochondrial coenzyme A diphosphatase NUDT8 OS=Mus musculus OX=10090 GN=Nudt8 PE=1 SV=1	Nudt8	0.362597	0.00128721	0.644788	0	2.09596	0.0373019	0.848419	0	Up	21.5983	15.9	2	2		1720.73	1538.13	4134.28	4338.26	5008.79	3793.83	2466.89	3984.92		2897.53			0.45562	0.407273	1.09469	1.1487	1.32625	1.00455	0.653192	1.05514		0.76722		cytoplasm	K18665	NUDT8; nudix motif 8 [EC:3.6.1.-]					PF00293	PF00293 NUDIX domain	L
CGIg25894	D8VNS7 FCNV1_CERRY Ryncolin-1 OS=Cerberus rynchops OX=46267 PE=1 SV=1	--	0.52552	0.00123676	0.812029	0.0343837	1.12206	0.205848	1.3771	0.00902561	Up	33.4622	8.4	2	0	18245.6	15218	19544	35018.9	33964.6	31883.4	19154	20910.5	19413.4	25203.6	26016.3	30687	0.893246	0.745027	0.956815	1.71442	1.6628	1.56091	0.93772	1.02371	0.950419	1.23389	1.27368	1.50234	extracellular	K10104	FCN; ficolin		GO:0001775 cell activation; GO:0001817 regulation of cytokine production; GO:0001819 positive regulation of cytokine production; GO:0001867 complement activation, lectin pathway; GO:0002218 activation of innate immune response; GO:0002220 innate immune response activating cell surface receptor signaling pathway; GO:0002221 pattern recognition receptor signaling pathway; GO:0002252 immune effector…	GO:0005576 extracellular region; GO:0005622 intracellular anatomical structure; GO:0005737 cytoplasm; GO:0005886 plasma membrane; GO:0009897 external side of plasma membrane; GO:0009986 cell surface; GO:0012505 endomembrane system; GO:0016020 membrane; GO:0019897 extrinsic component of plasma membrane; GO:0019898 extrinsic component of membrane; GO:0030141 secretory granule; GO:0031232 extrinsic …	GO:0001664 G protein-coupled receptor binding; GO:0003823 antigen binding; GO:0003824 catalytic activity; GO:0004175 endopeptidase activity; GO:0004252 serine-type endopeptidase activity; GO:0005102 signaling receptor binding; GO:0005488 binding; GO:0005515 protein binding; GO:0008233 peptidase activity; GO:0008236 serine-type peptidase activity; GO:0016787 hydrolase activity; GO:0017171 serine h…	PF00147	PF00147 Fibrinogen beta and gamma chains, C-terminal globular domain	R
CGIg18545	Q962X9 BUD31_BRABE Protein BUD31 homolog OS=Branchiostoma belcheri OX=7741 PE=2 SV=1	--	0.597219	0.00123242	0.844988	0.147523	1.62748	0.00393856	0.869364	0.263978	Up	16.9007	28.5	4	4	5401.44	5565.26	5938.38	9210.52	10461.3	8634.54	7927.25	9307.05	10278.4	6835.89	8228.26	8854.35	0.618526	0.637285	0.680012	1.05471	1.19793	0.988753	0.90776	1.06576	1.17699	0.782787	0.942229	1.01392	extracellular	K12873	BUD31, G10; bud site selection protein 31	map03040 Spliceosome	GO:0000375 RNA splicing, via transesterification reactions; GO:0000377 RNA splicing, via transesterification reactions with bulged adenosine as nucleophile; GO:0000398 mRNA splicing, via spliceosome; GO:0006139 nucleobase-containing compound metabolic process; GO:0006396 RNA processing; GO:0006397 mRNA processing; GO:0006725 cellular aromatic compound metabolic process; GO:0006807 nitrogen compou…	GO:0005622 intracellular anatomical structure; GO:0005634 nucleus; GO:0005681 spliceosomal complex; GO:0032991 protein-containing complex; GO:0043226 organelle; GO:0043227 membrane-bounded organelle; GO:0043229 intracellular organelle; GO:0043231 intracellular membrane-bounded organelle; GO:1990904 ribonucleoprotein complex;		PF01125	PF01125 G10 protein	K
CGIg26768	Q99JL1 SPEF1_MOUSE Sperm flagellar protein 1 OS=Mus musculus OX=10090 GN=Spef1 PE=1 SV=1	Spef1	0.607506	0.00122247	0.738259	0.0986598	1.30391	0.0110877	0.931987	0.575067	Up	36.1224	6.3	2	2	6922.34	7610.05	6340.35	11572.5	11996.9	10788.7	8592.31	9163.07	9460.86	7861.16	10921.3	6582.7	0.69018	0.758746	0.632153	1.15381	1.19613	1.07567	0.856681	0.913588	0.943279	0.783783	1.08889	0.656316	cytoplasm	K25614	SPEF1; sperm flagellar protein 1		GO:0007026 negative regulation of microtubule depolymerization; GO:0007498 mesoderm development; GO:0009888 tissue development; GO:0009987 cellular process; GO:0010639 negative regulation of organelle organization; GO:0016477 cell migration; GO:0031110 regulation of microtubule polymerization or depolymerization; GO:0031111 negative regulation of microtubule polymerization or depolymerization; GO…	GO:0005622 intracellular anatomical structure; GO:0005737 cytoplasm; GO:0005856 cytoskeleton; GO:0005929 cilium; GO:0005930 axoneme; GO:0031514 motile cilium; GO:0032838 plasma membrane bounded cell projection cytoplasm; GO:0042995 cell projection; GO:0043226 organelle; GO:0043228 non-membrane-bounded organelle; GO:0043229 intracellular organelle; GO:0043232 intracellular non-membrane-bounded org…	GO:0005488 binding; GO:0005515 protein binding; GO:0008017 microtubule binding; GO:0008092 cytoskeletal protein binding; GO:0015631 tubulin binding;	PF06294	PF06294 CH-like domain in sperm protein
CGIg10858	Q9CSU0 RPR1B_MOUSE Regulation of nuclear pre-mRNA domain-containing protein 1B OS=Mus musculus OX=10090 GN=Rprd1b PE=1 SV=2	Rprd1b	0.452565	0.00116938	1.09286	0.361249	1.45577	0.0177103	1.6588	0.00468296	Up	38.4226	12.9	4	4	5135.01	4330.06	4212.76	10982.3	10566.3	8674.34	6721.13	7425.57	5765.04	11840.9	9976.43	11212.2	0.530254	0.447133	0.43502	1.13406	1.0911	0.895735	0.694041	0.766783	0.595313	1.22272	1.03019	1.15781	endoplasmic reticulum	K15559	RTT103; regulator of Ty1 transposition protein 103		GO:0006139 nucleobase-containing compound metabolic process; GO:0006351 DNA-templated transcription; GO:0006355 regulation of DNA-templated transcription; GO:0006357 regulation of transcription by RNA polymerase II; GO:0006366 transcription by RNA polymerase II; GO:0006396 RNA processing; GO:0006397 mRNA processing; GO:0006470 protein dephosphorylation; GO:0006725 cellular aromatic compound metab…	GO:0000428 DNA-directed RNA polymerase complex; GO:0005622 intracellular anatomical structure; GO:0005634 nucleus; GO:0005654 nucleoplasm; GO:0005737 cytoplasm; GO:0005813 centrosome; GO:0005815 microtubule organizing center; GO:0005829 cytosol; GO:0005856 cytoskeleton; GO:0015630 microtubule cytoskeleton; GO:0016591 RNA polymerase II, holoenzyme; GO:0030880 RNA polymerase complex; GO:0031974 mem…	GO:0000993 RNA polymerase II complex binding; GO:0001098 basal transcription machinery binding; GO:0001099 basal RNA polymerase II transcription machinery binding; GO:0005488 binding; GO:0005515 protein binding; GO:0019899 enzyme binding; GO:0042802 identical protein binding; GO:0043175 RNA polymerase core enzyme binding; GO:0044877 protein-containing complex binding; GO:0070063 RNA polymerase bi…	PF16566	PF16566 Cell-cycle alteration and expression-elevated protein in tumour	A
CGIg24706	XP_011421552.2 uncharacterized protein LOC105324200 [Crassostrea gigas]	--	0.514819	0.00116648	0.47516	9.69109e-05	0.725793	0.0230823	1.27167	0.0151198	Up	29.119	8	2	0	37915.3	38850.9	30145.5	69102.5	70014.6	68551.6	27680.5	24764.8	25150.5	30650	35931.9	32094	1.05565	1.0817	0.839319	1.92397	1.94936	1.90863	0.770687	0.689507	0.700244	0.853364	1.00042	0.893569	extracellular
CGIg09887	A8E7I5 TTC36_DANRE Tetratricopeptide repeat protein 36 OS=Danio rerio OX=7955 GN=ttc36 PE=2 SV=1	ttc36	0.446427	0.0011626	0.92274	0.549718	0.678862	0.00632399	3.04472	0.000550659	Up	20.1736	7	1	1	1913.17	2182.06	2228.49	3962.52	5066.57	5136.08	1519.02	1499.78	1274.13	3777.72	4110.56	5182.49	0.534863	0.610035	0.623017	1.1078	1.41646	1.43589	0.424671	0.419291	0.356207	1.05613	1.14918	1.44886	cytoplasm,nucleus	K24941	TTC36, HBP21; tetratricopeptide repeat protein 36		GO:0006996 organelle organization; GO:0007275 multicellular organism development; GO:0007368 determination of left/right symmetry; GO:0007389 pattern specification process; GO:0007423 sensory organ development; GO:0007507 heart development; GO:0009653 anatomical structure morphogenesis; GO:0009790 embryo development; GO:0009799 specification of symmetry; GO:0009855 determination of bilateral symm…					S
CGIg14398	Q9UBS3 DNJB9_HUMAN DnaJ homolog subfamily B member 9 OS=Homo sapiens OX=9606 GN=DNAJB9 PE=1 SV=1	DNAJB9	0.653659	0.00115493	0.693458	1.0348e-05	1.20426	0.0602264	0.880947	0.0727357	Up	31.7687	3.6	1	1	11835.8	10304.8	12133.4	17768.6	17420.8	17244.8	12700.3	13490.8	15083.7	12164.8	12303.4	11892.7	0.943631	0.821571	0.967354	1.41663	1.3889	1.37487	1.01255	1.07558	1.20257	0.969858	0.980909	0.948165	extracellular	K09515	DNAJB9; DnaJ homolog subfamily B member 9		GO:0001775 cell activation; GO:0002376 immune system process; GO:0002377 immunoglobulin production; GO:0002440 production of molecular mediator of immune response; GO:0002520 immune system development; GO:0002521 leukocyte differentiation; GO:0006508 proteolysis; GO:0006511 ubiquitin-dependent protein catabolic process; GO:0006807 nitrogen compound metabolic process; GO:0006950 response to stress…	GO:0005622 intracellular anatomical structure; GO:0005634 nucleus; GO:0005730 nucleolus; GO:0005737 cytoplasm; GO:0005783 endoplasmic reticulum; GO:0005788 endoplasmic reticulum lumen; GO:0005789 endoplasmic reticulum membrane; GO:0012505 endomembrane system; GO:0016020 membrane; GO:0031974 membrane-enclosed lumen; GO:0031981 nuclear lumen; GO:0031984 organelle subcompartment; GO:0042175 nuclear …	GO:0005488 binding; GO:0005515 protein binding; GO:0030544 Hsp70 protein binding; GO:0031072 heat shock protein binding; GO:0051087 protein-folding chaperone binding; GO:0051787 misfolded protein binding;	PF00226	PF00226 DnaJ domain	O
CGIg03982	XP_019930843.2 uncharacterized protein LOC109617064 [Crassostrea gigas]	--	0.62358	0.00114884	0.901347	0.0326384	1.37953	0.00853392	1.04778	0.366298	Up	14.1342	8.8	1	1	14245.6	12430.3	14621.5	21228.7	21763.2	23234.4	20697.8	18117.5	18155.6	19198.8	20217.1	20276.9	0.581757	0.507624	0.597109	0.866931	0.888759	0.94884	0.845252	0.739878	0.741436	0.784035	0.825621	0.828065	cytoplasm	K10380	ANK; ankyrin	map04624 Toll and Imd signaling pathway
CGIg15990	O16025 AOSL_PLEHO Allene oxide synthase-lipoxygenase protein OS=Plexaura homomalla OX=47982 PE=1 SV=1	--	0.658923	0.00114777	1.14432	0.0290225	1.1417	0.079239	1.52111	0.000950416	Up	75.8517	8.7	6	5	14628.2	13937.3	12676.6	21820.8	20937.6	19831.8	14565.7	15968.2	16552.4	22520.1	24282.7	24820.6	0.720398	0.686373	0.624283	1.07461	1.03112	0.976657	0.717316	0.786388	0.815155	1.10905	1.19585	1.22234	cytoplasm	K00461	ALOX5; arachidonate 5-lipoxygenase [EC:1.13.11.34]	map00590 Arachidonic acid metabolism; map01100 Metabolic pathways; map04664 Fc epsilon RI signaling pathway; map04726 Serotonergic synapse; map04913 Ovarian steroidogenesis	GO:0001676 long-chain fatty acid metabolic process; GO:0001775 cell activation; GO:0002252 immune effector process; GO:0002263 cell activation involved in immune response; GO:0002274 myeloid leukocyte activation; GO:0002275 myeloid cell activation involved in immune response; GO:0002283 neutrophil activation involved in immune response; GO:0002366 leukocyte activation involved in immune response;…	GO:0005576 extracellular region; GO:0005622 intracellular anatomical structure; GO:0005634 nucleus; GO:0005635 nuclear envelope; GO:0005641 nuclear envelope lumen; GO:0005654 nucleoplasm; GO:0005737 cytoplasm; GO:0005829 cytosol; GO:0005886 plasma membrane; GO:0012505 endomembrane system; GO:0016020 membrane; GO:0016363 nuclear matrix; GO:0030141 secretory granule; GO:0030425 dendrite; GO:0031090…	GO:0003824 catalytic activity; GO:0004051 arachidonate 5-lipoxygenase activity; GO:0005488 binding; GO:0005506 iron ion binding; GO:0016491 oxidoreductase activity; GO:0016701 oxidoreductase activity, acting on single donors with incorporation of molecular oxygen; GO:0016702 oxidoreductase activity, acting on single donors with incorporation of molecular oxygen, incorporation of two atoms of oxyg…	PF01477; PF00305	PF01477 PLAT/LH2 domain; PF00305 Lipoxygenase
CGIg12023	XP_011444071.2 28S ribosomal protein S22, mitochondrial isoform X2 [Crassostrea gigas]	--	0.442661	0.00113278	0.540931	0.000237598	1.16538	0.413943	1.04859	0.653151	Up	43.1342	4.9	2	2	3216.54	4325.34	3743.79	9340.29	8015.57	8139.24	4663.75	3329.89	5158.42	4602.43	4646.29	4542.38	0.443542	0.596438	0.516247	1.28797	1.1053	1.12235	0.643103	0.459172	0.711315	0.634648	0.640695	0.626367	mitochondria	K17401	MRPS22; small subunit ribosomal protein S22		GO:0006412 translation; GO:0006414 translational elongation; GO:0006415 translational termination; GO:0006518 peptide metabolic process; GO:0006807 nitrogen compound metabolic process; GO:0008152 metabolic process; GO:0009058 biosynthetic process; GO:0009059 macromolecule biosynthetic process; GO:0009987 cellular process; GO:0010467 gene expression; GO:0016043 cellular component organization; GO:…	GO:0000313 organellar ribosome; GO:0000314 organellar small ribosomal subunit; GO:0005622 intracellular anatomical structure; GO:0005737 cytoplasm; GO:0005739 mitochondrion; GO:0005740 mitochondrial envelope; GO:0005743 mitochondrial inner membrane; GO:0005759 mitochondrial matrix; GO:0005761 mitochondrial ribosome; GO:0005763 mitochondrial small ribosomal subunit; GO:0005840 ribosome; GO:0015935…	GO:0003735 structural constituent of ribosome; GO:0005198 structural molecule activity;			J
CGIg18619	Q6NRT5 CSN1_XENLA COP9 signalosome complex subunit 1 OS=Xenopus laevis OX=8355 GN=csn1 PE=2 SV=1	csn1	0.612531	0.00111411	0.580602	0.000790054	1.23757	0.0219851	0.765915	0.0109274	Up	54.5643	4.3	2	2	29832.3	34422.9	30014.1	49416.2	55002.2	49482.8	36209.4	39739.4	40716	32459.3	29347.1	27548.8	0.678754	0.783201	0.68289	1.12433	1.25143	1.12585	0.823848	0.904163	0.926384	0.738524	0.667715	0.6268	cytoplasm	K12175	GPS1, COPS1, CSN1; COP9 signalosome complex subunit 1		GO:0000003 reproduction; GO:0000165 MAPK cascade; GO:0000338 protein deneddylation; GO:0000715 nucleotide-excision repair, DNA damage recognition; GO:0001932 regulation of protein phosphorylation; GO:0001933 negative regulation of protein phosphorylation; GO:0002009 morphogenesis of an epithelium; GO:0003006 developmental process involved in reproduction; GO:0006139 nucleobase-containing compound…	GO:0005622 intracellular anatomical structure; GO:0005634 nucleus; GO:0005654 nucleoplasm; GO:0005737 cytoplasm; GO:0005829 cytosol; GO:0008180 COP9 signalosome; GO:0031974 membrane-enclosed lumen; GO:0031981 nuclear lumen; GO:0032991 protein-containing complex; GO:0043226 organelle; GO:0043227 membrane-bounded organelle; GO:0043229 intracellular organelle; GO:0043231 intracellular membrane-bound…	GO:0004857 enzyme inhibitor activity; GO:0005095 GTPase inhibitor activity; GO:0005488 binding; GO:0005515 protein binding; GO:0030234 enzyme regulator activity; GO:0030695 GTPase regulator activity; GO:0060589 nucleoside-triphosphatase regulator activity; GO:0098772 molecular function regulator activity;	PF01399	PF01399 PCI domain	R
CGIg10034	Q9H9H4 VP37B_HUMAN Vacuolar protein sorting-associated protein 37B OS=Homo sapiens OX=9606 GN=VPS37B PE=1 SV=1	VPS37B	0.47248	0.00110586	0.753349	0.020428	2.04266	0.00219445	0.780579	0.0533436	Up	24.3726	5.5	1	1	7299.58	6477.28	8215.1	13785.9	16275.5	16484.4	15686.7	16400.4	12834.9	10566.6	12173.6	12325	0.485298	0.430629	0.546164	0.916528	1.08204	1.09593	1.0429	1.09035	0.853304	0.702501	0.809336	0.819402	cytoplasm	K12185	VPS37; ESCRT-I complex subunit VPS37	map04144 Endocytosis	GO:0006810 transport; GO:0006914 autophagy; GO:0006996 organelle organization; GO:0007032 endosome organization; GO:0008152 metabolic process; GO:0009056 catabolic process; GO:0009057 macromolecule catabolic process; GO:0009987 cellular process; GO:0010256 endomembrane system organization; GO:0016032 viral process; GO:0016043 cellular component organization; GO:0016050 vesicle organization; GO:00…	GO:0000813 ESCRT I complex; GO:0005622 intracellular anatomical structure; GO:0005737 cytoplasm; GO:0005768 endosome; GO:0005829 cytosol; GO:0005886 plasma membrane; GO:0010008 endosome membrane; GO:0012505 endomembrane system; GO:0016020 membrane; GO:0030496 midbody; GO:0031090 organelle membrane; GO:0031410 cytoplasmic vesicle; GO:0031982 vesicle; GO:0032991 protein-containing complex; GO:00364…	GO:0005488 binding; GO:0005515 protein binding; GO:0048306 calcium-dependent protein binding;	PF07200	PF07200 Modifier of rudimentary (Mod(r)) protein	S
CGIg04285	Q5F389 WWOX_CHICK WW domain-containing oxidoreductase OS=Gallus gallus OX=9031 GN=WWOX PE=2 SV=2	WWOX	0.638911	0.00110571	1.00338	0.947049	0.908776	0.359151	1.7281	0.00368803	Up	37.246	5.5	2	1	5434.94	6406.61	6005.14	8910.35	9334.56	9688.08	6355.96	4978.22	4884.46	9443.83	8771.93	9811.65	0.700648	0.825913	0.774157	1.14868	1.20337	1.24895	0.819383	0.64177	0.629684	1.21746	1.13084	1.26488	mitochondria	K19329	WWOX; WW domain-containing oxidoreductase					PF00106	PF00106 short chain dehydrogenase	Q
CGIg07704	P84227 H32_BOVIN Histone H3.2 OS=Bos taurus OX=9913 PE=1 SV=2	--	0.492752	0.00109507	0.614801	0.00193962	1.72847	0.0106151	0.721845	0.0422181	Up	15.388	6.6	1	1	31474.8	26532.8	34511.1	58499.6	63271.2	65988.4	47914.3	48445.3	63556.3	42968.7	36806.7	35659.2	0.585911	0.493915	0.642433	1.08898	1.17781	1.22839	0.891937	0.901822	1.18312	0.799873	0.685166	0.663804	nucleus	K11253	H3; histone H3	map04613 Neutrophil extracellular trap formation	GO:0000122 negative regulation of transcription by RNA polymerase II; GO:0000183 rDNA heterochromatin formation; GO:0002682 regulation of immune system process; GO:0006325 chromatin organization; GO:0006334 nucleosome assembly; GO:0006335 DNA replication-dependent chromatin assembly; GO:0006355 regulation of DNA-templated transcription; GO:0006357 regulation of transcription by RNA polymerase II;…	GO:0000228 nuclear chromosome; GO:0000785 chromatin; GO:0000786 nucleosome; GO:0005576 extracellular region; GO:0005622 intracellular anatomical structure; GO:0005634 nucleus; GO:0005654 nucleoplasm; GO:0005694 chromosome; GO:0005700 polytene chromosome; GO:0031974 membrane-enclosed lumen; GO:0031981 nuclear lumen; GO:0032991 protein-containing complex; GO:0032993 protein-DNA complex; GO:0035059 …	GO:0003676 nucleic acid binding; GO:0003677 DNA binding; GO:0003682 chromatin binding; GO:0005488 binding; GO:0031490 chromatin DNA binding; GO:0031491 nucleosome binding; GO:0031492 nucleosomal DNA binding; GO:0044877 protein-containing complex binding; GO:0097159 organic cyclic compound binding; GO:1901363 heterocyclic compound binding;	PF00125	PF00125 Core histone H2A/H2B/H3/H4	B
CGIg14870	XP_011428194.2 universal stress protein YxiE [Crassostrea gigas]	--	0.586096	0.00109168	0.526757	0.000390836	0.988626	0.907715	0.909096	0.193821	Up	15.9215	7.7	1	1	8408.66	8728.88	7129.4	13581.4	14211.8	13611.3	7594.45	8087.5	8308.98	6524.86	7356.34	7928.85	0.544271	0.564999	0.461468	0.879088	0.919893	0.881023	0.49157	0.523484	0.53782	0.422338	0.476158	0.513215	cytoplasm							PF00582	PF00582 Universal stress protein family
CGIg01478	S8FGV1 LAC2_FOMPI Laccase-2 OS=Fomitopsis pinicola (strain FP-58527) OX=743788 GN=LCC2 PE=1 SV=1	LCC2	0.5286	0.00109087	0.582232	0.00378032	1.64571	0.00113923	0.669292	0.00625466	Up	78.8773	4.3	3	2	6445.54	6283.55	5465.02	11565.9	12519.4	10334.1	9617.72	10610.9	9713.56	7401.74	5821.37	6816.96	0.548124	0.534348	0.464741	0.983556	1.06464	0.878806	0.817883	0.902344	0.826033	0.629438	0.495044	0.579709	plasma membrane							PF07732; PF00394; PF07731	PF07732 Multicopper oxidase; PF00394 Multicopper oxidase; PF07731 Multicopper oxidase	Q
CGIg18081	Q96Q11 TRNT1_HUMAN CCA tRNA nucleotidyltransferase 1, mitochondrial OS=Homo sapiens OX=9606 GN=TRNT1 PE=1 SV=2	TRNT1	0.645009	0.00106755	0.877207	0.0729077	1.15935	0.0183933	1.17306	0.017321	Up	55.473	7.9	3	3	18660.7	18798.1	19925.4	31021.8	26922.6	31022	22136.4	23432.7	20959.3	26859.9	26440.6	24741.5	0.71827	0.723558	0.766949	1.19406	1.03628	1.19407	0.852053	0.901949	0.806747	1.03386	1.01773	0.952328	mitochondria	K00974	cca; tRNA nucleotidyltransferase (CCA-adding enzyme) [EC:2.7.7.72 3.1.3.- 3.1.4.-]		GO:0000959 mitochondrial RNA metabolic process; GO:0000963 mitochondrial RNA processing; GO:0000965 mitochondrial RNA 3'-end processing; GO:0001680 tRNA 3'-terminal CCA addition; GO:0006139 nucleobase-containing compound metabolic process; GO:0006396 RNA processing; GO:0006399 tRNA metabolic process; GO:0006725 cellular aromatic compound metabolic process; GO:0006807 nitrogen compound metabolic p…	GO:0005622 intracellular anatomical structure; GO:0005634 nucleus; GO:0005654 nucleoplasm; GO:0005737 cytoplasm; GO:0005739 mitochondrion; GO:0005759 mitochondrial matrix; GO:0031974 membrane-enclosed lumen; GO:0031981 nuclear lumen; GO:0043226 organelle; GO:0043227 membrane-bounded organelle; GO:0043229 intracellular organelle; GO:0043231 intracellular membrane-bounded organelle; GO:0043233 orga…	GO:0000049 tRNA binding; GO:0000166 nucleotide binding; GO:0003676 nucleic acid binding; GO:0003723 RNA binding; GO:0003824 catalytic activity; GO:0004810 CCA tRNA nucleotidyltransferase activity; GO:0005488 binding; GO:0005524 ATP binding; GO:0009022 tRNA nucleotidyltransferase activity; GO:0016740 transferase activity; GO:0016772 transferase activity, transferring phosphorus-containing groups; …	PF01743; PF12627	PF01743 Poly A polymerase head domain; PF12627 Probable RNA and SrmB- binding site of polymerase A	J
CGIg03574	Q6DFS6 CHM2A_XENTR Charged multivesicular body protein 2a OS=Xenopus tropicalis OX=8364 GN=chmp2a PE=2 SV=1	chmp2a	0.475562	0.00106372	0.817045	0.0294458	1.88141	0.000784472	0.913178	0.0259055	Up	25.4404	19.7	4	4	3354.31	3464.53	4152.35	6913.67	8435.08	7721.19	7103.83	6631.35	6906.14	6112.82	6255.06	6481.31	0.449704	0.464481	0.556695	0.926899	1.13087	1.03516	0.952393	0.889049	0.925889	0.81953	0.838601	0.868934	cytoplasm	K12191	CHMP2A; charged multivesicular body protein 2A	map04144 Endocytosis; map04217 Necroptosis	GO:0000070 mitotic sister chromatid segregation; GO:0000278 mitotic cell cycle; GO:0000280 nuclear division; GO:0000819 sister chromatid segregation; GO:0000920 septum digestion after cytokinesis; GO:0006508 proteolysis; GO:0006511 ubiquitin-dependent protein catabolic process; GO:0006807 nitrogen compound metabolic process; GO:0006810 transport; GO:0006914 autophagy; GO:0006996 organelle organiz…	GO:0000815 ESCRT III complex; GO:0005622 intracellular anatomical structure; GO:0005634 nucleus; GO:0005635 nuclear envelope; GO:0005737 cytoplasm; GO:0005768 endosome; GO:0005829 cytosol; GO:0010008 endosome membrane; GO:0012505 endomembrane system; GO:0016020 membrane; GO:0030117 membrane coat; GO:0031090 organelle membrane; GO:0031410 cytoplasmic vesicle; GO:0031967 organelle envelope; GO:0031…	GO:0005488 binding; GO:0005515 protein binding; GO:0005543 phospholipid binding; GO:0008289 lipid binding; GO:0019904 protein domain specific binding; GO:0031210 phosphatidylcholine binding; GO:0043167 ion binding; GO:0043168 anion binding; GO:0043169 cation binding; GO:0050997 quaternary ammonium group binding; GO:0070405 ammonium ion binding;			U
CGIg11838	XP_034339431.1 uncharacterized protein LOC105327203 isoform X5 [Crassostrea gigas]	--	0.43576	0.00102016	1.09379	0.139981	1.90149	0.00181212	1.32007	0.000477115	Up	46.8188	15.2	5	5	8144.23	10132	7567.31	20728.9	18107.9	20470	16735.1	16246.5	16159.6	22237.6	22038.5	20593.4	0.444689	0.553224	0.413188	1.13183	0.988724	1.1177	0.913764	0.887084	0.882341	1.21421	1.20334	1.12443	cytoplasm
CGIg12446	Q6NT55 CP4FN_HUMAN Ultra-long-chain fatty acid omega-hydroxylase OS=Homo sapiens OX=9606 GN=CYP4F22 PE=1 SV=1	CYP4F22	0.47364	0.0010115	0.850191	0.0406213	0.708579	0.0250008	2.53326	0.000174858	Up	57.6294	9	5	5	4935.12	4445.14	5944.83	10932	10322.8	11101.3	3873.3	3681.81	3303.92	10031.2	9046.57	8430.99	0.593927	0.534959	0.715442	1.31563	1.24231	1.336	0.46614	0.443094	0.397617	1.20723	1.08873	1.01464	endoplasmic reticulum	K07426	CYP4B1; cytochrome P450 family 4 subfamily B1 [EC:1.14.14.1]					PF00067	PF00067 Cytochrome P450	QI
CGIg24614	P61799 APTX_DANRE Aprataxin OS=Danio rerio OX=7955 GN=aptx PE=2 SV=1	aptx	0.639856	0.000981336	0.906849	0.0958108	1.45762	0.000897091	0.972321	0.46163	Up	27.7163	4.2	1	1	17627.8	18962.8	19357.4	27069.6	28963.9	31405.1	28860	25948.7	26742.2	26989.9	26246.7	26057	0.593187	0.638111	0.65139	0.910907	0.974654	1.0568	0.971155	0.873188	0.899892	0.908226	0.883218	0.876835	nucleus	K10863	APTX; aprataxin [EC:3.6.1.70 3.6.1.71 3.6.1.72]		GO:0000012 single strand break repair; GO:0000302 response to reactive oxygen species; GO:0000375 RNA splicing, via transesterification reactions; GO:0000377 RNA splicing, via transesterification reactions with bulged adenosine as nucleophile; GO:0000398 mRNA splicing, via spliceosome; GO:0006139 nucleobase-containing compound metabolic process; GO:0006259 DNA metabolic process; GO:0006266 DNA li…	GO:0000785 chromatin; GO:0005622 intracellular anatomical structure; GO:0005634 nucleus; GO:0005654 nucleoplasm; GO:0005694 chromosome; GO:0005730 nucleolus; GO:0031974 membrane-enclosed lumen; GO:0031981 nuclear lumen; GO:0043226 organelle; GO:0043227 membrane-bounded organelle; GO:0043228 non-membrane-bounded organelle; GO:0043229 intracellular organelle; GO:0043231 intracellular membrane-bound…	GO:0003676 nucleic acid binding; GO:0003677 DNA binding; GO:0003682 chromatin binding; GO:0003684 damaged DNA binding; GO:0003690 double-stranded DNA binding; GO:0003723 RNA binding; GO:0003725 double-stranded RNA binding; GO:0003824 catalytic activity; GO:0004518 nuclease activity; GO:0004527 exonuclease activity; GO:0004529 DNA exonuclease activity; GO:0004536 DNA nuclease activity; GO:0005488 …	PF16278	PF16278 C2HE / C2H2 / C2HC zinc-binding finger	R
CGIg22924	P04464 CALM_WHEAT Calmodulin OS=Triticum aestivum OX=4565 PE=1 SV=3	--	0.3939	0.000960829	0.552297	0.00348199	1.72711	0.00287038	0.811835	0.0397264	Up	18.3127	23.3	4	4	4936.44	6035.61	5640.98	14786.5	15669.5	11719.8	9842.49	8491.25	10358.8	7392.21	7620.47	8280.89	0.331326	0.405102	0.378615	0.99245	1.05171	0.786617	0.660614	0.56992	0.695266	0.496155	0.511475	0.555801	cytoplasm	K02183	CALM; calmodulin	map04014 Ras signaling pathway; map04015 Rap1 signaling pathway; map04020 Calcium signaling pathway; map04022 cGMP-PKG signaling pathway; map04024 cAMP signaling pathway; map04070 Phosphatidylinositol signaling system; map04114 Oocyte meiosis; map04218 Cellular senescence; map04261 Adrenergic signaling in cardiomyocytes; map04270 Vascular smooth muscle contraction; map04371 Apelin signaling pathw…				PF13499	PF13499 EF-hand domain pair	T
CGIg17847	Q71UH5 CALM_GLOSP Calmodulin OS=Globisporangium splendens OX=82926 PE=2 SV=1	--	0.575683	0.000935357	0.117158	0	0.642459	0.00252882	0.316768	0	Up	22.17	10.7	2	2	4234.05	3703.88	4197.83	6400.19	7293.27	7387.19	2387.13	2576.4	2833.21		823.252		0.671436	0.587362	0.665692	1.01494	1.15657	1.17146	0.378551	0.408565	0.449291		0.130551		mitochondria	K02183	CALM; calmodulin	map04014 Ras signaling pathway; map04015 Rap1 signaling pathway; map04020 Calcium signaling pathway; map04022 cGMP-PKG signaling pathway; map04024 cAMP signaling pathway; map04070 Phosphatidylinositol signaling system; map04114 Oocyte meiosis; map04218 Cellular senescence; map04261 Adrenergic signaling in cardiomyocytes; map04270 Vascular smooth muscle contraction; map04371 Apelin signaling pathw…		GO:0032991 protein-containing complex;	GO:0005488 binding; GO:0005509 calcium ion binding; GO:0005515 protein binding; GO:0008092 cytoskeletal protein binding; GO:0017022 myosin binding; GO:0019904 protein domain specific binding; GO:0043167 ion binding; GO:0043169 cation binding; GO:0046872 metal ion binding; GO:0051401 CH domain binding; GO:0097718 disordered domain specific binding;	PF13499	PF13499 EF-hand domain pair	T
CGIg26643	XP_011414793.1 uncharacterized protein LOC105319082 isoform X2 [Crassostrea gigas]	--	0.637244	0.00093116	0.579552	0.000411943	1.1549	0.0575867	0.787482	0.0113692	Up	12.9428	19.3	2	2	44435.8	37961.4	38838.5	64973.8	61549.7	63726.5	48537.1	46969.8	44508.6	34278.2	40237.8	35743.7	0.656899	0.561188	0.574154	0.960516	0.909897	0.942077	0.71753	0.694361	0.657976	0.50674	0.59484	0.528404	cytoplasm
CGIg09051	O14662 STX16_HUMAN Syntaxin-16 OS=Homo sapiens OX=9606 GN=STX16 PE=1 SV=3	STX16	0.614016	0.000924303	0.593824	0.00210702	1.14812	0.0855659	0.842345	0.0897212	Up	36.5408	15.9	4	4	4858.6	5246.36	5776.39	8361.22	9044.15	8459.37	6412.97	6140.43	5680.34	5706.04	5171.53	4481.53	0.639066	0.69007	0.759787	1.09978	1.1896	1.11269	0.843518	0.80767	0.747152	0.750533	0.680226	0.589469	mitochondria	K08489	STX16; syntaxin 16	map04130 SNARE interactions in vesicular transport	GO:0006810 transport; GO:0006836 neurotransmitter transport; GO:0006886 intracellular protein transport; GO:0006887 exocytosis; GO:0006904 vesicle docking involved in exocytosis; GO:0006906 vesicle fusion; GO:0006996 organelle organization; GO:0007030 Golgi organization; GO:0007154 cell communication; GO:0007267 cell-cell signaling; GO:0007268 chemical synaptic transmission; GO:0007269 neurotrans…	GO:0000139 Golgi membrane; GO:0000323 lytic vacuole; GO:0005622 intracellular anatomical structure; GO:0005737 cytoplasm; GO:0005764 lysosome; GO:0005773 vacuole; GO:0005794 Golgi apparatus; GO:0005795 Golgi stack; GO:0005802 trans-Golgi network; GO:0005829 cytosol; GO:0005886 plasma membrane; GO:0012505 endomembrane system; GO:0016020 membrane; GO:0031090 organelle membrane; GO:0031201 SNARE com…	GO:0000149 SNARE binding; GO:0005484 SNAP receptor activity; GO:0005488 binding; GO:0005515 protein binding; GO:0019905 syntaxin binding;	PF00804	PF00804 Syntaxin	U
CGIg09623	Q02369 NDUB9_BOVIN NADH dehydrogenase [ubiquinone] 1 beta subcomplex subunit 9 OS=Bos taurus OX=9913 GN=NDUFB9 PE=1 SV=2	NDUFB9	0.506384	0.000904659	0.511137	0.0115971	0.802836	0.108134	1.25728	0.276613	Up	21.7978	12.3	2	2	7804.95	7007.48	7868.35	13168.5	15030.2	16591	7217.08	5968.6	5023.27	9459.41	7613.56	5820.7	0.482249	0.432975	0.486166	0.813648	0.928681	1.02512	0.445925	0.368785	0.310375	0.584474	0.470423	0.359646	mitochondria	K03965	NDUFB9; NADH dehydrogenase (ubiquinone) 1 beta subcomplex subunit 9	map00190 Oxidative phosphorylation; map01100 Metabolic pathways; map04714 Thermogenesis; map04723 Retrograde endocannabinoid signaling	GO:0003008 system process; GO:0006091 generation of precursor metabolites and energy; GO:0006119 oxidative phosphorylation; GO:0006120 mitochondrial electron transport, NADH to ubiquinone; GO:0006139 nucleobase-containing compound metabolic process; GO:0006163 purine nucleotide metabolic process; GO:0006725 cellular aromatic compound metabolic process; GO:0006753 nucleoside phosphate metabolic pr…	GO:0005622 intracellular anatomical structure; GO:0005737 cytoplasm; GO:0005739 mitochondrion; GO:0005740 mitochondrial envelope; GO:0005743 mitochondrial inner membrane; GO:0005746 mitochondrial respirasome; GO:0005747 mitochondrial respiratory chain complex I; GO:0016020 membrane; GO:0019866 organelle inner membrane; GO:0030964 NADH dehydrogenase complex; GO:0031090 organelle membrane; GO:00319…	GO:0003824 catalytic activity; GO:0003954 NADH dehydrogenase activity; GO:0008137 NADH dehydrogenase (ubiquinone) activity; GO:0016491 oxidoreductase activity; GO:0016651 oxidoreductase activity, acting on NAD(P)H; GO:0016655 oxidoreductase activity, acting on NAD(P)H, quinone or similar compound as acceptor; GO:0050136 NADH dehydrogenase (quinone) activity;			C
CGIg19326	A8Y5U1 RIMC1_DANRE RAB7A-interacting MON1-CCZ1 complex subunit 1 OS=Danio rerio OX=7955 GN=rimoc1 PE=2 SV=1	rimoc1	0.538894	0.000844162	0.544618	0.0121583	0.787006	0.0767275	1.28413	0.215169	Up	30.9416	11.6	3	3	3559.65	4105.54	3530.87	7600.21	6506.85	6668.94	2726.76	3487.81	2596.8	3044.03	4797.42	3473.53	0.544656	0.628181	0.540253	1.16289	0.995601	1.0204	0.417217	0.533663	0.397332	0.465761	0.734045	0.531479	cytoplasm					GO:0005622 intracellular anatomical structure; GO:0005634 nucleus; GO:0005654 nucleoplasm; GO:0005737 cytoplasm; GO:0005829 cytosol; GO:0031974 membrane-enclosed lumen; GO:0031981 nuclear lumen; GO:0043226 organelle; GO:0043227 membrane-bounded organelle; GO:0043229 intracellular organelle; GO:0043231 intracellular membrane-bounded organelle; GO:0043233 organelle lumen; GO:0070013 intracellular o…
CGIg23473	Q6DRI7 DDX51_DANRE ATP-dependent RNA helicase DDX51 OS=Danio rerio OX=7955 GN=ddx51 PE=2 SV=1	ddx51	0.615712	0.000817125	0.887147	0.134455	1.25303	0.00593562	1.14989	0.0668462	Up	80.0954	1.4	1	1	5784.25	5268.17	5265.28	9572.76	8661.34	8268.05	7001.24	7012.72	6432.68	8522.93	7237.57	7750.8	0.84202	0.766894	0.766474	1.39352	1.26084	1.20359	1.01918	1.02085	0.936413	1.24069	1.05358	1.12829	nucleus	K14807	DDX51, DBP6; ATP-dependent RNA helicase DDX51/DBP6 [EC:3.6.4.13]		GO:0006139 nucleobase-containing compound metabolic process; GO:0006725 cellular aromatic compound metabolic process; GO:0006807 nitrogen compound metabolic process; GO:0008152 metabolic process; GO:0009987 cellular process; GO:0010501 RNA secondary structure unwinding; GO:0016070 RNA metabolic process; GO:0034641 cellular nitrogen compound metabolic process; GO:0043170 macromolecule metabolic pr…	GO:0005622 intracellular anatomical structure; GO:0005634 nucleus; GO:0005730 nucleolus; GO:0005737 cytoplasm; GO:0031974 membrane-enclosed lumen; GO:0031981 nuclear lumen; GO:0043226 organelle; GO:0043227 membrane-bounded organelle; GO:0043228 non-membrane-bounded organelle; GO:0043229 intracellular organelle; GO:0043231 intracellular membrane-bounded organelle; GO:0043232 intracellular non-memb…	GO:0003724 RNA helicase activity; GO:0003824 catalytic activity; GO:0004386 helicase activity; GO:0008186 ATP-dependent activity, acting on RNA; GO:0016462 pyrophosphatase activity; GO:0016787 hydrolase activity; GO:0016817 hydrolase activity, acting on acid anhydrides; GO:0016818 hydrolase activity, acting on acid anhydrides, in phosphorus-containing anhydrides; GO:0016887 ATP hydrolysis activit…	PF00270; PF00271	PF00270 DEAD/DEAH box helicase; PF00271 Helicase conserved C-terminal domain	A
CGIg08550	XP_011429359.1 uncharacterized protein LOC105329709 [Crassostrea gigas]	--	0.54453	0.000815405	0.601997	0.0245243	0.967496	0.551718	1.14268	0.455276	Up	49.0362	2.3	1	1	3736.07	3380.74	3640.51	7344.52	6411.38	5999.37	3429.94	3231.04	3746.69	4558.38	2972.17	4362.06	0.749608	0.678316	0.730436	1.47361	1.28638	1.20372	0.688187	0.648279	0.751739	0.914598	0.596338	0.875207	cytoplasm
CGIg07361	O97676 SRBP1_PIG Sterol regulatory element-binding protein 1 OS=Sus scrofa OX=9823 GN=SREBF1 PE=2 SV=2	SREBF1	0.653534	0.000814393	0.882389	0.113221	1.19197	0.0152354	1.13273	0.107786	Up	121.164	2.6	3	3	3247.09	3469.55	3166.01	4954.28	4757.39	5410.2	4025.79	4082.79	3671.28	4120.87	4348.25	4874.26	0.627843	0.670856	0.612166	0.957938	0.919867	1.04609	0.778408	0.78943	0.709862	0.796793	0.840757	0.942465	nucleus	K07197	SREBP1, SREBF1; sterol regulatory element-binding transcription factor 1	map04152 AMPK signaling pathway; map04910 Insulin signaling pathway	GO:0000122 negative regulation of transcription by RNA polymerase II; GO:0000902 cell morphogenesis; GO:0001101 response to acid chemical; GO:0002027 regulation of heart rate; GO:0002791 regulation of peptide secretion; GO:0002792 negative regulation of peptide secretion; GO:0003062 regulation of heart rate by chemical signal; GO:0006066 alcohol metabolic process; GO:0006082 organic acid metaboli…	GO:0000139 Golgi membrane; GO:0005622 intracellular anatomical structure; GO:0005634 nucleus; GO:0005635 nuclear envelope; GO:0005654 nucleoplasm; GO:0005737 cytoplasm; GO:0005783 endoplasmic reticulum; GO:0005789 endoplasmic reticulum membrane; GO:0005794 Golgi apparatus; GO:0005829 cytosol; GO:0012505 endomembrane system; GO:0016020 membrane; GO:0031090 organelle membrane; GO:0031965 nuclear me…	GO:0000976 transcription cis-regulatory region binding; GO:0000977 RNA polymerase II transcription regulatory region sequence-specific DNA binding; GO:0000978 RNA polymerase II cis-regulatory region sequence-specific DNA binding; GO:0000981 DNA-binding transcription factor activity, RNA polymerase II-specific; GO:0000987 cis-regulatory region sequence-specific DNA binding; GO:0001067 transcriptio…	PF00010	PF00010 Helix-loop-helix DNA-binding domain	K
CGIg20157	XP_034312094.1 uncharacterized protein LOC117680369 [Crassostrea gigas]	--	0.37542	0.00081295	0.241067	0.0890578	1.81728	0.0012195	0.353346	0.254999	Up	67.4318	1.9	1	1	1862.09	1864.98	2012.47	4968.57	4246.28	6073.45	3647.63		3305.92	139.52	2207.45	1338.54	0.562513	0.563388	0.607941	1.50094	1.28275	1.83471	1.1019		0.998676	0.0421472	0.666844	0.404356	cytoplasm	K11997	TRIM2_3; tripartite motif-containing protein 2/3					PF00643	PF00643 B-box zinc finger	O
CGIg17447	D8VNT0 FCNV4_CERRY Ryncolin-4 OS=Cerberus rynchops OX=46267 PE=1 SV=1	--	0.356863	0.000773183	0.281676	0.00147397	1.22599	0.638738	0.643818	0.314595	Up	33.1286	5.5	1	1	3510.25	3404.89	2498.37	8569.39	8461.86	9347.27	5145.61		2548.29	1744.47	2890.94	2794.79	0.663111	0.643208	0.471959	1.61882	1.5985	1.76576	0.972041		0.481389	0.329543	0.546118	0.527955	extracellular	K10104	FCN; ficolin			GO:0016020 membrane;	GO:0005488 binding; GO:0008061 chitin binding; GO:0097367 carbohydrate derivative binding;	PF00147	PF00147 Fibrinogen beta and gamma chains, C-terminal globular domain	R
CGIg10545	P86786 GIGA3_CRAGI Gigasin-3a (Fragment) OS=Crassostrea gigas OX=29159 PE=1 SV=1	--	0.461342	0.000751714	0.92191	0.0620282	1.37413	0.0233447	1.45425	0.00127591	Up	66.0128	12.7	6	4	15849.8	18864.6	14147.8	34747.5	35862.3	35303.2	20899.6	22760.9	23482.2	30810.3	34260.6	32571.4	0.41069	0.488808	0.36659	0.900357	0.929244	0.914756	0.541539	0.589768	0.608458	0.79834	0.88774	0.84397	extracellular
CGIg23959	XP_011433764.1 uncharacterized protein LOC105332768 isoform X1 [Crassostrea gigas]	--	0.381665	0.000745917	0.429951	0.0530691	1.97794	0.00321972	0.569537	0.1298	Up	19.5232	14.7	2	2	21028.5	28028.6	20093.4	61066.5	61110.5	59004.1	46167.7	47920.9	42687.4	31160.5	35082.4	11656.1	0.267468	0.356506	0.255575	0.776726	0.777286	0.750494	0.587222	0.609522	0.542956	0.396341	0.446225	0.148257	cytoplasm	K02183	CALM; calmodulin	map04014 Ras signaling pathway; map04015 Rap1 signaling pathway; map04020 Calcium signaling pathway; map04022 cGMP-PKG signaling pathway; map04024 cAMP signaling pathway; map04070 Phosphatidylinositol signaling system; map04114 Oocyte meiosis; map04218 Cellular senescence; map04261 Adrenergic signaling in cardiomyocytes; map04270 Vascular smooth muscle contraction; map04371 Apelin signaling pathw…
CGIg08832	XP_011436873.3 complement C1q-like protein 4 [Crassostrea gigas]	--	0.63818	0.000721788	1.52474	0.00779083	1.34148	4.11092e-05	1.78102	0.00132921	Up	20.2611	6	2	2	12012.8	11712	12322.4	19206.7	20058.8	17218.9	16235	16073.1	16048.4	24759.2	30760.8	30603.7	0.954284	0.930386	0.978872	1.52575	1.59345	1.36785	1.28968	1.27682	1.27486	1.96684	2.4436	2.43112	extracellular	K23284	C1QL; C1q-related factor					PF00386	PF00386 C1q domain
CGIg16480	XP_011455494.1 neuroglobin [Crassostrea gigas]	--	0.51095	0.000720744	0.779038	0.0646104	1.42724	0.00958249	1.06828	0.619794	Up	27.4127	30.5	7	7	6259.48	5764.25	7337.76	12622.5	12934	12336.6	9529.95	9447.73	8655.74	11032.1	7965.19	10522.9	0.507389	0.467246	0.594794	1.02317	1.04842	0.999995	0.772491	0.765826	0.701628	0.894252	0.645653	0.852981	cytoplasm	K21893	NGB; neuroglobin					PF00042	PF00042 Globin
CGIg01010	P06868 PLMN_BOVIN Plasminogen OS=Bos taurus OX=9913 GN=PLG PE=1 SV=2	PLG	0.378887	0.000683406	0	0	0.649909	0.0334192	0	0	Up	128.586	0.8	1	1	1889.55	2292.97	1818.05	5763.33	5522.13	4551.89	1568.51	1042.68	1288.63				0.684835	0.831047	0.658921	2.08882	2.0014	1.64976	0.568481	0.377902	0.467041				extracellular	K01315	PLG; plasminogen [EC:3.4.21.7]	map04080 Neuroactive ligand-receptor interaction; map04610 Complement and coagulation cascades	GO:0000003 reproduction; GO:0001568 blood vessel development; GO:0001701 in utero embryonic development; GO:0001890 placenta development; GO:0001892 embryonic placenta development; GO:0001944 vasculature development; GO:0002376 immune system process; GO:0002576 platelet degranulation; GO:0003006 developmental process involved in reproduction; GO:0003008 system process; GO:0003013 circulatory syst…	GO:0005576 extracellular region; GO:0005615 extracellular space; GO:0005622 intracellular anatomical structure; GO:0005737 cytoplasm; GO:0005886 plasma membrane; GO:0009897 external side of plasma membrane; GO:0009986 cell surface; GO:0012505 endomembrane system; GO:0016020 membrane; GO:0019897 extrinsic component of plasma membrane; GO:0019898 extrinsic component of membrane; GO:0030141 secretor…	GO:0001968 fibronectin binding; GO:0003823 antigen binding; GO:0003824 catalytic activity; GO:0004175 endopeptidase activity; GO:0004252 serine-type endopeptidase activity; GO:0004857 enzyme inhibitor activity; GO:0004866 endopeptidase inhibitor activity; GO:0005102 signaling receptor binding; GO:0005488 binding; GO:0005515 protein binding; GO:0005539 glycosaminoglycan binding; GO:0008201 heparin…	PF01400; PF00431; PF00629; PF00051; PF00008	PF01400 Astacin (Peptidase family M12A); PF00431 CUB domain; PF00629 MAM domain, meprin/A5/mu; PF00051 Kringle domain; PF00008 EGF-like domain
CGIg02666	XP_034334625.1 E3 ubiquitin-protein ligase TRIM71-like isoform X1 [Crassostrea gigas]	--	0.452185	0.000667584	0.810697	0.287937	1.36659	0.00210977	1.31191	0.229562	Up	62.8809	2	1	1	22563.7	22290.2	22158.4	44121.5	46412.9	57662.1	28739.9	29660.5	33177.7	27840.2	46774.6	45527.7	0.71419	0.705536	0.701361	1.39654	1.46907	1.82513	0.909682	0.93882	1.05015	0.881204	1.48052	1.44105	cytoplasm	K11997	TRIM2_3; tripartite motif-containing protein 2/3					PF00643	PF00643 B-box zinc finger
CGIg17077	Q7TSU0 C1D_CRIGR Nuclear nucleic acid-binding protein C1D OS=Cricetulus griseus OX=10029 GN=C1D PE=2 SV=1	C1D	0.467392	0.000663255	0.959031	0.708324	2.25235	0.000558746	0.910993	0.445836	Up	19.2569	5.2	1	1	2513.73	2199.29	2409.62	4427.15	5563.21	5248.77	5056.77	4870.69	6115.26	4705.68	4200	5709.12	0.609863	0.533576	0.584604	1.07408	1.3497	1.27342	1.22684	1.18169	1.48364	1.14166	1.01897	1.3851	nucleus	K12592	C1D, LRP1; exosome complex protein LRP1	map03018 RNA degradation	GO:0000460 maturation of 5.8S rRNA; GO:0006139 nucleobase-containing compound metabolic process; GO:0006355 regulation of DNA-templated transcription; GO:0006364 rRNA processing; GO:0006396 RNA processing; GO:0006725 cellular aromatic compound metabolic process; GO:0006807 nitrogen compound metabolic process; GO:0008152 metabolic process; GO:0009889 regulation of biosynthetic process; GO:0009890 …	GO:0000176 nuclear exosome (RNase complex); GO:0000178 exosome (RNase complex); GO:0005622 intracellular anatomical structure; GO:0005634 nucleus; GO:0005654 nucleoplasm; GO:0005730 nucleolus; GO:0017053 transcription repressor complex; GO:0031974 membrane-enclosed lumen; GO:0031981 nuclear lumen; GO:0032991 protein-containing complex; GO:0043226 organelle; GO:0043227 membrane-bounded organelle; …	GO:0003676 nucleic acid binding; GO:0003677 DNA binding; GO:0003712 transcription coregulator activity; GO:0003714 transcription corepressor activity; GO:0003723 RNA binding; GO:0005102 signaling receptor binding; GO:0005488 binding; GO:0005515 protein binding; GO:0008134 transcription factor binding; GO:0016922 nuclear receptor binding; GO:0051427 hormone receptor binding; GO:0097159 organic cyc…			L
CGIg08752	XP_011436874.2 complement C1q-like protein 4 [Crassostrea gigas]	--	0.616902	0.000660278	1.86959	0.000165987	1.33864	0.00373881	2.26395	4.65075e-05	Up	20.7794	11.1	2	2	31186.7	32292.9	29453.8	54165.2	46787.9	49692.4	44757.7	39277.1	40369.6	95005.8	95944.1	90695.4	0.786532	0.814432	0.74283	1.36605	1.18	1.25325	1.1288	0.990574	1.01813	2.39606	2.41972	2.28735	cytoplasm	K23284	C1QL; C1q-related factor		GO:0001932 regulation of protein phosphorylation; GO:0001933 negative regulation of protein phosphorylation; GO:0008285 negative regulation of cell population proliferation; GO:0009892 negative regulation of metabolic process; GO:0009966 regulation of signal transduction; GO:0009968 negative regulation of signal transduction; GO:0010563 negative regulation of phosphorus metabolic process; GO:0010…	GO:0005576 extracellular region; GO:0005615 extracellular space;	GO:0005488 binding; GO:0005515 protein binding; GO:0042802 identical protein binding;	PF00386	PF00386 C1q domain
CGIg27246	Q18206 NAS36_CAEEL Zinc metalloproteinase nas-36 OS=Caenorhabditis elegans OX=6239 GN=nas-36 PE=1 SV=2	nas-36	0.570173	0.000623021	0.417555	1.01669e-06	1.45129	0.00347042	0.504606	1.07197e-05	Up	79.8044	6.9	5	4	13037.4	11221.1	10853.1	20241.7	21089.1	20249.7	17701	16855.4	16400.6	8392.2	8594.39	8726.63	0.810022	0.697176	0.67431	1.25763	1.31028	1.25813	1.09978	1.04724	1.01898	0.521414	0.533976	0.542192	extracellular	K08076	E3.4.24.21; astacin [EC:3.4.24.21]					PF01400; PF00629	PF01400 Astacin (Peptidase family M12A); PF00629 MAM domain, meprin/A5/mu	O
CGIg10887	O75934 SPF27_HUMAN Pre-mRNA-splicing factor SPF27 OS=Homo sapiens OX=9606 GN=BCAS2 PE=1 SV=1	BCAS2	0.329537	0.000598598	0.875157	0.00302438	1.78776	0.00703129	1.4855	0.00022071	Up	24.7991	16.5	4	4	18307.8	22558.1	15287.5	54619.7	57752.1	58028.7	35507.3	32221.3	32660.1	50423.2	49302.6	49401.4	0.384222	0.473421	0.320835	1.14629	1.21203	1.21784	0.745185	0.676223	0.685432	1.05822	1.0347	1.03678	cytoplasm	K12861	BCAS2; pre-mRNA-splicing factor SPF27	map03040 Spliceosome	GO:0000375 RNA splicing, via transesterification reactions; GO:0000377 RNA splicing, via transesterification reactions with bulged adenosine as nucleophile; GO:0000398 mRNA splicing, via spliceosome; GO:0006139 nucleobase-containing compound metabolic process; GO:0006396 RNA processing; GO:0006397 mRNA processing; GO:0006725 cellular aromatic compound metabolic process; GO:0006807 nitrogen compou…	GO:0000974 Prp19 complex; GO:0005622 intracellular anatomical structure; GO:0005634 nucleus; GO:0005654 nucleoplasm; GO:0005681 spliceosomal complex; GO:0005684 U2-type spliceosomal complex; GO:0005813 centrosome; GO:0005815 microtubule organizing center; GO:0005856 cytoskeleton; GO:0015630 microtubule cytoskeleton; GO:0016604 nuclear body; GO:0016607 nuclear speck; GO:0031974 membrane-enclosed l…				S
CGIg03233	XP_034316653.1 uncharacterized protein LOC117686084 [Crassostrea gigas]	--	0.343678	0.000591873	0.358252	0.000145704	1.39228	0.0388336	0.748704	0.0186717	Up	26.9867	7.3	2	2	2792.58	2804.76	2180.59	8559.21	7317.82	6754.44	3127.85	3977.77	3723.44	2722.75	2783.6	2601.41	0.640626	0.643418	0.500233	1.9635	1.67872	1.54949	0.717537	0.912511	0.854167	0.624606	0.638565	0.596771	plasma membrane
CGIg25047	XP_011433684.1 sarcoplasmic calcium-binding protein [Crassostrea gigas]	--	0.597738	0.000571591	0.381196	6.47805e-05	0.930332	0.205393	0.685489	0.00197264	Up	20.6802	40.8	7	7	242373	242536	264749	386851	448030	419279	218235	248966	230231	164861	148148	165072	0.523593	0.523945	0.571931	0.835705	0.967868	0.905757	0.471447	0.537835	0.497361	0.356146	0.320041	0.3566	cytoplasm
CGIg05130	P18172 DHGL_DROPS Glucose dehydrogenase [FAD, quinone] OS=Drosophila pseudoobscura pseudoobscura OX=46245 GN=Gld PE=3 SV=4	Gld	0.463667	0.000564013	0.359006	8.78217e-05	0.321377	0.118667	2.40925	0.162522	Up	67.6761	1.6	1	1	2801.25	2261.71	2443.02	5447.7	5785.57	4955.04	1002.27	605.895		2087.34	1938.68	1785.68	0.663795	0.535942	0.578907	1.29091	1.37097	1.17416	0.237501	0.143575		0.494624	0.459398	0.42314	extracellular				GO:0002165 instar larval or pupal development; GO:0006629 lipid metabolic process; GO:0007275 multicellular organism development; GO:0008152 metabolic process; GO:0008202 steroid metabolic process; GO:0009791 post-embryonic development; GO:0009987 cellular process; GO:0010817 regulation of hormone levels; GO:0032501 multicellular organismal process; GO:0032502 developmental process; GO:0042180 ce…		GO:0003824 catalytic activity; GO:0016491 oxidoreductase activity;	PF00732; PF05199	PF00732 GMC oxidoreductase; PF05199 GMC oxidoreductase	R
CGIg13510	XP_011430149.2 short-chain collagen C4 [Crassostrea gigas]	--	0.612739	0.000555831	2.41831	1.20844e-05	2.73586	1.54701e-05	1.44259	4.2788e-05	Up	25.1745	37.9	8	8	389487	412820	445285	638852	697623	699618	1.12905e+06	1.16405e+06	1.12013e+06	1.60148e+06	1.63609e+06	1.68632e+06	0.328275	0.347941	0.375304	0.53845	0.587984	0.589666	0.95161	0.981106	0.944094	1.3498	1.37896	1.4213	extracellular
CGIg01205	P18433 PTPRA_HUMAN Receptor-type tyrosine-protein phosphatase alpha OS=Homo sapiens OX=9606 GN=PTPRA PE=1 SV=3	PTPRA	0.423432	0.000552444	1.15469	0.0134277	0.743436	0.504967	3.66807	0.166337	Up	90.6156	1	1	1	733.675	699.911	565.508	1670.89	1546.81	1503.47		669.006	321.794	1788.07	1865.55	1797.87	0.330091	0.3149	0.25443	0.751757	0.69593	0.676431		0.300995	0.14478	0.804479	0.839337	0.808885	cytoplasm	K08114	PTPRZ; receptor-type tyrosine-protein phosphatase zeta [EC:3.1.3.48]					PF00102	PF00102 Protein-tyrosine phosphatase	T
CGIg28298	XP_011436330.2 uncharacterized protein LOC105334533 isoform X1 [Crassostrea gigas]	--	0.473309	0.000544115	0.451926	0.000443773	0.491633	0.00032523	1.94214	0.000441383	Up	24.4434	9.8	2	2	60482.6	51155.2	50815.4	119600	103775	119854	26095.2	25916	27856.3	46834.4	57166.2	51113.5	1.3271	1.12244	1.11499	2.62424	2.27701	2.62983	0.572579	0.568645	0.611219	1.02763	1.25433	1.12153	extracellular
CGIg18933	Q5XK85 KATIP_XENLA Protein KATNIP homolog OS=Xenopus laevis OX=8355 PE=2 SV=1	--	0.614306	0.000541553	0.885366	0.0677772	1.37087	0.129422	1.05134	0.672249	Up	101.658	7.6	6	6	2935.65	2968.22	3250.2	4622.83	5197.11	5081.56	4736.13	3024.57	4788.35	4113.05	4504.19	4576.03	0.713425	0.721339	0.789867	1.12344	1.26301	1.23493	1.15098	0.735033	1.16367	0.999558	1.09461	1.11207	nucleus	K22858	JBTS26; protein JBTS26
CGIg27181	XP_034317595.1 isatin hydrolase-like [Crassostrea gigas]	--	0.646316	0.000516995	0.892532	0.0329561	2.29797	5.45071e-05	0.600943	0.000206344	Up	32.2447	14.6	3	1	122577	135370	138680	210185	206892	196595	319595	298551	293292	183532	191325	172866	0.702238	0.775527	0.794489	1.20414	1.18527	1.12628	1.83094	1.71038	1.68025	1.05144	1.09609	0.990338	extracellular
CGIg09672	XP_019921416.1 protein toll-like [Crassostrea gigas]	--	0.548716	0.000513399	1.93544	6.59288e-05	1.30706	0.0157224	2.69858	3.54143e-05	Up	89.306	1.3	1	1	37680.2	39764.7	34083.6	71605.3	63032.8	68615.4	52592.1	48729	44453.7	133205	129895	130285	0.738746	0.779615	0.668233	1.40387	1.2358	1.34525	1.0311	0.955366	0.871546	2.61158	2.54669	2.55432	endoplasmic reticulum				GO:0000578 embryonic axis specification; GO:0002164 larval development; GO:0002225 positive regulation of antimicrobial peptide production; GO:0002229 defense response to oomycetes; GO:0002239 response to oomycetes; GO:0002376 immune system process; GO:0002520 immune system development; GO:0002682 regulation of immune system process; GO:0002684 positive regulation of immune system process; GO:000…	GO:0005622 intracellular anatomical structure; GO:0005737 cytoplasm; GO:0005768 endosome; GO:0005769 early endosome; GO:0005886 plasma membrane; GO:0009897 external side of plasma membrane; GO:0009986 cell surface; GO:0012505 endomembrane system; GO:0016020 membrane; GO:0031410 cytoplasmic vesicle; GO:0031982 vesicle; GO:0032153 cell division site; GO:0032154 cleavage furrow; GO:0032991 protein-c…	GO:0004888 transmembrane signaling receptor activity; GO:0005102 signaling receptor binding; GO:0005121 Toll binding; GO:0005488 binding; GO:0005515 protein binding; GO:0015026 coreceptor activity; GO:0019899 enzyme binding; GO:0019900 kinase binding; GO:0019901 protein kinase binding; GO:0019904 protein domain specific binding; GO:0019955 cytokine binding; GO:0038023 signaling receptor activity;…	PF13676	PF13676 TIR domain	T
CGIg08971	P02693 FABPI_RAT Fatty acid-binding protein, intestinal OS=Rattus norvegicus OX=10116 GN=Fabp2 PE=1 SV=4	Fabp2	0.552209	0.000513369	0.740341	0.00127283	0.885475	0.110291	1.51409	0.000375773	Up	15.3167	25.5	4	1	49981.6	49957.2	58638.3	91891.7	99655.9	95621.1	44967.1	46651.1	48797.9	69483.7	68170.7	74948.4	1.13052	1.12997	1.32632	2.07847	2.25408	2.16282	1.0171	1.05519	1.10374	1.57163	1.54193	1.69523	cytoplasm	K08752	FABP3; fatty acid-binding protein 3, muscle and heart	map03320 PPAR signaling pathway	GO:0003008 system process; GO:0006082 organic acid metabolic process; GO:0006629 lipid metabolic process; GO:0006631 fatty acid metabolic process; GO:0006638 neutral lipid metabolic process; GO:0006639 acylglycerol metabolic process; GO:0006641 triglyceride metabolic process; GO:0006810 transport; GO:0006811 monoatomic ion transport; GO:0006820 monoatomic anion transport; GO:0006869 lipid transpo…	GO:0005622 intracellular anatomical structure; GO:0005737 cytoplasm; GO:0005829 cytosol; GO:0005886 plasma membrane; GO:0005902 microvillus; GO:0005938 cell cortex; GO:0016020 membrane; GO:0042995 cell projection; GO:0045177 apical part of cell; GO:0045179 apical cortex; GO:0071944 cell periphery; GO:0098858 actin-based cell projection; GO:0099568 cytoplasmic region; GO:0099738 cell cortex region…	GO:0005215 transporter activity; GO:0005319 lipid transporter activity; GO:0005324 long-chain fatty acid transporter activity; GO:0005488 binding; GO:0005504 fatty acid binding; GO:0008289 lipid binding; GO:0031406 carboxylic acid binding; GO:0033293 monocarboxylic acid binding; GO:0036041 long-chain fatty acid binding; GO:0036094 small molecule binding; GO:0043167 ion binding; GO:0043168 anion b…	PF00061	PF00061 Lipocalin / cytosolic fatty-acid binding protein family	I
CGIg05116	XP_034331231.1 28S ribosomal protein S15, mitochondrial [Crassostrea gigas]	--	0.539365	0.000495205	0.673061	0.00204199	1.68789	0.0273901	0.739312	0.127001	Up	50.4913	8.7	3	3	6759.37	6589.54	5941.02	10990.1	12833.8	11940.3	8800.53	9690.4	14068.3	7535.94	8119.75	8415.75	0.655609	0.639137	0.576236	1.06596	1.24478	1.15812	0.853587	0.939898	1.36452	0.730931	0.787556	0.816266	cytoplasm	K02956	RP-S15, MRPS15, rpsO; small subunit ribosomal protein S15	map03010 Ribosome	GO:0006412 translation; GO:0006414 translational elongation; GO:0006415 translational termination; GO:0006518 peptide metabolic process; GO:0006807 nitrogen compound metabolic process; GO:0008152 metabolic process; GO:0009058 biosynthetic process; GO:0009059 macromolecule biosynthetic process; GO:0009987 cellular process; GO:0010467 gene expression; GO:0016043 cellular component organization; GO:…	GO:0000313 organellar ribosome; GO:0000314 organellar small ribosomal subunit; GO:0005622 intracellular anatomical structure; GO:0005634 nucleus; GO:0005730 nucleolus; GO:0005737 cytoplasm; GO:0005739 mitochondrion; GO:0005740 mitochondrial envelope; GO:0005743 mitochondrial inner membrane; GO:0005759 mitochondrial matrix; GO:0005761 mitochondrial ribosome; GO:0005763 mitochondrial small ribosoma…	GO:0003735 structural constituent of ribosome; GO:0005198 structural molecule activity;	PF00312	PF00312 Ribosomal protein S15	J
CGIg23209	XP_011430677.1 cytochrome c oxidase subunit NDUFA4 [Crassostrea gigas]	--	0.636399	0.000492862	0.700922	0.00202268	1.37298	0.00018282	0.802185	0.00274959	Up	12.5005	33.7	3	3	102123	103766	96103.7	170029	152432	152072	139273	137092	138267	103626	114936	114049	0.598347	0.607968	0.563077	0.996212	0.893108	0.890999	0.816008	0.803228	0.810112	0.607153	0.673416	0.668218	cytoplasm	K03948	NDUFA4; NADH dehydrogenase (ubiquinone) 1 alpha subcomplex subunit 4	map00190 Oxidative phosphorylation; map01100 Metabolic pathways; map04714 Thermogenesis; map04723 Retrograde endocannabinoid signaling	GO:0006091 generation of precursor metabolites and energy; GO:0006119 oxidative phosphorylation; GO:0006120 mitochondrial electron transport, NADH to ubiquinone; GO:0006139 nucleobase-containing compound metabolic process; GO:0006163 purine nucleotide metabolic process; GO:0006725 cellular aromatic compound metabolic process; GO:0006753 nucleoside phosphate metabolic process; GO:0006793 phosphoru…	GO:0005622 intracellular anatomical structure; GO:0005737 cytoplasm; GO:0005739 mitochondrion; GO:0005740 mitochondrial envelope; GO:0005743 mitochondrial inner membrane; GO:0005746 mitochondrial respirasome; GO:0005747 mitochondrial respiratory chain complex I; GO:0005751 mitochondrial respiratory chain complex IV; GO:0016020 membrane; GO:0019866 organelle inner membrane; GO:0030964 NADH dehydro…	GO:0003824 catalytic activity; GO:0003954 NADH dehydrogenase activity; GO:0016491 oxidoreductase activity; GO:0016651 oxidoreductase activity, acting on NAD(P)H;
CGIg19820	A6H7C2 PEX3_BOVIN Peroxisomal biogenesis factor 3 OS=Bos taurus OX=9913 GN=PEX3 PE=2 SV=1	PEX3	0.620783	0.000475437	0.745848	0.00110613	1.21042	0.119238	0.992602	0.999317	Up	42.2626	19.3	7	7	14640.6	14709	16189	22924.8	25123.8	25308.1	18600.5	20985.8	15534.4	18057.5	17902.1	18753.4	0.642808	0.645815	0.710796	1.00654	1.10309	1.11118	0.816675	0.921401	0.682054	0.792832	0.786008	0.823386	peroxisome	K13336	PEX3; peroxin-3	map04146 Peroxisome	GO:0006082 organic acid metabolic process; GO:0006605 protein targeting; GO:0006612 protein targeting to membrane; GO:0006625 protein targeting to peroxisome; GO:0006629 lipid metabolic process; GO:0006631 fatty acid metabolic process; GO:0006633 fatty acid biosynthetic process; GO:0006810 transport; GO:0006886 intracellular protein transport; GO:0006996 organelle organization; GO:0007031 peroxis…	GO:0005622 intracellular anatomical structure; GO:0005634 nucleus; GO:0005654 nucleoplasm; GO:0005737 cytoplasm; GO:0005777 peroxisome; GO:0005778 peroxisomal membrane; GO:0005783 endoplasmic reticulum; GO:0005829 cytosol; GO:0005886 plasma membrane; GO:0012505 endomembrane system; GO:0016020 membrane; GO:0031090 organelle membrane; GO:0031903 microbody membrane; GO:0031974 membrane-enclosed lume…	GO:0005488 binding; GO:0005515 protein binding; GO:0008289 lipid binding; GO:0046983 protein dimerization activity;			MU
CGIg12962	Q69ZQ2 ISY1_MOUSE Pre-mRNA-splicing factor ISY1 homolog OS=Mus musculus OX=10090 GN=Isy1 PE=1 SV=2	Isy1	0.494709	0.00047254	0.739849	0.0148971	1.85511	0.000924752	0.806166	0.0473086	Up	33.535	15.3	4	4	12793.8	12463.4	14973.6	25594.2	28924.7	26803.2	26574.6	24997.6	23060.2	19777.1	22457.8	17931.2	0.523719	0.510192	0.612951	1.04771	1.18404	1.0972	1.08784	1.02328	0.943978	0.809582	0.919319	0.73402	nucleus	K12870	ISY1; pre-mRNA-splicing factor ISY1	map03040 Spliceosome	GO:0000245 spliceosomal complex assembly; GO:0000350 generation of catalytic spliceosome for second transesterification step; GO:0000375 RNA splicing, via transesterification reactions; GO:0000377 RNA splicing, via transesterification reactions with bulged adenosine as nucleophile; GO:0000389 mRNA 3'-splice site recognition; GO:0000393 spliceosomal conformational changes to generate catalytic con…	GO:0000974 Prp19 complex; GO:0005622 intracellular anatomical structure; GO:0005634 nucleus; GO:0005654 nucleoplasm; GO:0005681 spliceosomal complex; GO:0031974 membrane-enclosed lumen; GO:0031981 nuclear lumen; GO:0032991 protein-containing complex; GO:0043226 organelle; GO:0043227 membrane-bounded organelle; GO:0043229 intracellular organelle; GO:0043231 intracellular membrane-bounded organelle…	GO:0003676 nucleic acid binding; GO:0003723 RNA binding; GO:0005488 binding; GO:0097159 organic cyclic compound binding; GO:1901363 heterocyclic compound binding;			A
CGIg17907	Q80UF4 SDCG8_MOUSE Serologically defined colon cancer antigen 8 homolog OS=Mus musculus OX=10090 GN=Sdccag8 PE=1 SV=1	Sdccag8	0.561695	0.000469454	0.774893	0.0539341	1.61018	0.000387341	0.856777	0.148078	Up	84.7284	12.1	8	8	1967.82	1760.79	1736.2	3218.9	3040.33	3469.91	2830.21	2990.33	2978.77	2097.08	2630.02	2811.94	0.621861	0.556436	0.548666	1.01722	0.960792	1.09654	0.894389	0.944989	0.941336	0.662711	0.831126	0.888616	cytoplasm,nucleus	K16488	SDCCAG8; serologically defined colon cancer antigen 8		GO:0000086 G2/M transition of mitotic cell cycle; GO:0000226 microtubule cytoskeleton organization; GO:0000278 mitotic cell cycle; GO:0001764 neuron migration; GO:0006996 organelle organization; GO:0007010 cytoskeleton organization; GO:0007017 microtubule-based process; GO:0007049 cell cycle; GO:0007163 establishment or maintenance of cell polarity; GO:0007275 multicellular organism development; …	GO:0005622 intracellular anatomical structure; GO:0005737 cytoplasm; GO:0005813 centrosome; GO:0005814 centriole; GO:0005815 microtubule organizing center; GO:0005829 cytosol; GO:0005856 cytoskeleton; GO:0005911 cell-cell junction; GO:0015630 microtubule cytoskeleton; GO:0030054 cell junction; GO:0034451 centriolar satellite; GO:0043226 organelle; GO:0043228 non-membrane-bounded organelle; GO:004…
CGIg08015	XP_011449383.2 adiponectin [Crassostrea gigas]	--	0.218344	0.000464908	1.23874	0.0311	1.96119	0.0088188	2.8928	8.97187e-05	Up	24.6139	8.6	2	2		2042.02	1860.76	10127.8	8431.64	8252.29	3981.97		3672.13	11166.3	10728.9	11317.4		0.195775	0.178396	0.970983	0.808367	0.791172	0.381763		0.352058	1.07055	1.02862	1.08503	extracellular	K23284	C1QL; C1q-related factor		GO:0001932 regulation of protein phosphorylation; GO:0001933 negative regulation of protein phosphorylation; GO:0008285 negative regulation of cell population proliferation; GO:0009892 negative regulation of metabolic process; GO:0009966 regulation of signal transduction; GO:0009968 negative regulation of signal transduction; GO:0010563 negative regulation of phosphorus metabolic process; GO:0010…	GO:0005576 extracellular region; GO:0005615 extracellular space;	GO:0005488 binding; GO:0005515 protein binding; GO:0042802 identical protein binding;	PF00386	PF00386 C1q domain
CGIg19862	Q2KIR8 TDH_BOVIN L-threonine 3-dehydrogenase, mitochondrial OS=Bos taurus OX=9913 GN=TDH PE=2 SV=1	TDH	0.573697	0.00045851	0.685829	0.00172867	1.27076	0.00852175	0.94074	0.264248	Up	40.8021	17	5	4	14677.5	16361.6	14303.9	27525.2	24675.9	26835.3	19674.5	19803.6	18142	19413.1	17050.6	17741.8	0.615506	0.686127	0.599836	1.15428	1.03479	1.12535	0.825054	0.830467	0.760789	0.814093	0.715018	0.744008	mitochondria	K15789	TDH; threonine 3-dehydrogenase [EC:1.1.1.103]	map00260 Glycine, serine and threonine metabolism; map01100 Metabolic pathways	GO:0006082 organic acid metabolic process; GO:0006520 amino acid metabolic process; GO:0006566 threonine metabolic process; GO:0006567 threonine catabolic process; GO:0006807 nitrogen compound metabolic process; GO:0008152 metabolic process; GO:0009056 catabolic process; GO:0009063 amino acid catabolic process; GO:0009066 aspartate family amino acid metabolic process; GO:0009068 aspartate family …		GO:0003824 catalytic activity; GO:0005488 binding; GO:0005515 protein binding; GO:0008743 L-threonine 3-dehydrogenase activity; GO:0016491 oxidoreductase activity; GO:0016614 oxidoreductase activity, acting on CH-OH group of donors; GO:0016616 oxidoreductase activity, acting on the CH-OH group of donors, NAD or NADP as acceptor; GO:0042802 identical protein binding;			R
CGIg19859	Q5NC57 F183B_MOUSE Protein FAM183B OS=Mus musculus OX=10090 GN=Fam183b PE=1 SV=2	Fam183b	0.654176	0.000454596	0.881485	0.0340525	1.42175	0.00174447	0.947758	0.322368	Up	16.2803	17.4	2	2	27385	27714.4	29927.9	40895.9	44109.1	44971.3	43029.3	40154	37704.3	36348.4	38269.7	39954	0.626495	0.63403	0.684669	0.935586	1.0091	1.02882	0.984392	0.918613	0.862571	0.831553	0.875505	0.914039	cytoplasm	K25474	FAM183; protein FAM183			GO:0005929 cilium; GO:0042995 cell projection; GO:0043226 organelle; GO:0097546 ciliary base; GO:0120025 plasma membrane bounded cell projection;
CGIg02927	Q5ZJL9 SAMH1_CHICK Deoxynucleoside triphosphate triphosphohydrolase SAMHD1 OS=Gallus gallus OX=9031 GN=SAMHD1 PE=2 SV=2	SAMHD1	0.282276	0.000452831	0.39364	0.000179516	2.30618	0.00351852	0.604689	0.00617931	Up	54.3213	2.6	1	1	3346.13	4704.38	4436.34	15950	15164.3	13122	8407.64	11244.3	9144.91	5512.41	6236.53	5664.22	0.323106	0.45426	0.428378	1.54015	1.46428	1.26707	0.811851	1.08576	0.883042	0.532284	0.602206	0.546943	mitochondria	K22544	SAMHD1; deoxynucleoside triphosphate triphosphohydrolase SAMHD1 [EC:3.1.5.-]		GO:0002252 immune effector process; GO:0002376 immune system process; GO:0002682 regulation of immune system process; GO:0006139 nucleobase-containing compound metabolic process; GO:0006163 purine nucleotide metabolic process; GO:0006195 purine nucleotide catabolic process; GO:0006203 dGTP catabolic process; GO:0006725 cellular aromatic compound metabolic process; GO:0006753 nucleoside phosphate …	GO:0005622 intracellular anatomical structure; GO:0005634 nucleus; GO:0005654 nucleoplasm; GO:0005886 plasma membrane; GO:0016020 membrane; GO:0031974 membrane-enclosed lumen; GO:0031981 nuclear lumen; GO:0043226 organelle; GO:0043227 membrane-bounded organelle; GO:0043229 intracellular organelle; GO:0043231 intracellular membrane-bounded organelle; GO:0043233 organelle lumen; GO:0070013 intracel…	GO:0000166 nucleotide binding; GO:0003676 nucleic acid binding; GO:0003723 RNA binding; GO:0003824 catalytic activity; GO:0004518 nuclease activity; GO:0004540 RNA nuclease activity; GO:0005488 binding; GO:0005515 protein binding; GO:0008270 zinc ion binding; GO:0008832 dGTPase activity; GO:0016787 hydrolase activity; GO:0016788 hydrolase activity, acting on ester bonds; GO:0016793 triphosphoric …			S
CGIg23271	XP_022330046.1 uncharacterized protein LOC111128609 [Crassostrea virginica]	--	0.415388	0.000451322	0.394853	0.328255	0.733993	0.089048	1.29506	0.915729	Up	13.8659	7.8	1	1	11648.7	14091.6	11416.6	27043.8	31891.8	30515.5	8280.95	11460.3	7531.65	18394.1	5152.59		0.770579	0.932183	0.755223	1.78899	2.10969	2.01865	0.547797	0.758116	0.49823	1.2168	0.340851		extracellular									W
CGIg09811	Q15056 IF4H_HUMAN Eukaryotic translation initiation factor 4H OS=Homo sapiens OX=9606 GN=EIF4H PE=1 SV=5	EIF4H	0.56919	0.000450881	1.41782	6.84231e-05	1.60681	0.0195785	1.55025	0.0160502	Up	32.8925	9.2	2	2	16992.5	14790.2	14477.6	26415.7	26790.3	28068.1	20914.1	23009.3	30408.1	38811.2	38694.4	37726.8	0.628853	0.547352	0.535783	0.977582	0.991445	1.03873	0.773982	0.851519	1.12533	1.43631	1.43199	1.39618	nucleus	K24086	EIF4H; translation initiation factor 4H		GO:0000003 reproduction; GO:0001731 formation of translation preinitiation complex; GO:0002181 cytoplasmic translation; GO:0002183 cytoplasmic translational initiation; GO:0006412 translation; GO:0006413 translational initiation; GO:0006417 regulation of translation; GO:0006446 regulation of translational initiation; GO:0006518 peptide metabolic process; GO:0006807 nitrogen compound metabolic pro…	GO:0005622 intracellular anatomical structure; GO:0005737 cytoplasm; GO:0005829 cytosol; GO:0005844 polysome; GO:0016281 eukaryotic translation initiation factor 4F complex; GO:0032991 protein-containing complex; GO:0048471 perinuclear region of cytoplasm; GO:1990904 ribonucleoprotein complex;	GO:0003676 nucleic acid binding; GO:0003723 RNA binding; GO:0003725 double-stranded RNA binding; GO:0003727 single-stranded RNA binding; GO:0003729 mRNA binding; GO:0003743 translation initiation factor activity; GO:0003824 catalytic activity; GO:0004386 helicase activity; GO:0005488 binding; GO:0008135 translation factor activity, RNA binding; GO:0016462 pyrophosphatase activity; GO:0016787 hydr…	PF00076	PF00076 RNA recognition motif. (a.k.a. RRM, RBD, or RNP domain)	R
CGIg22751	XP_011418842.1 uncharacterized protein LOC105322022 [Crassostrea gigas]	--	0.562424	0.00044122	0.540241	0.000156611	1.35298	0.0111374	0.709959	0.00474522	Up	23.7024	9.5	3	3	26204.3	28351.5	30368.5	53491.8	49800.7	47704.3	42327.7	36926.4	35646.4	28799	26296.5	26479.1	0.600918	0.650156	0.696411	1.22668	1.14203	1.09396	0.970659	0.846798	0.817443	0.660421	0.603032	0.607219	mitochondria							PF03358	PF03358 NADPH-dependent FMN reductase
CGIg13724	P45377 ALD2_MOUSE Aldose reductase-related protein 2 OS=Mus musculus OX=10090 GN=Akr1b8 PE=1 SV=2	Akr1b8	0.608406	0.000439928	1.26108	0.0208615	2.12585	3.136e-05	0.975023	0.642996	Up	36.6251	14.3	4	1	14710.3	13386.6	13515.9	21207.5	23737.7	23451.1	28911.9	30699.7	28850.9	31751.8	27422.6	27078.5	0.909323	0.8275	0.83549	1.31095	1.46736	1.44964	1.78721	1.89772	1.78344	1.96275	1.69515	1.67387	cytoplasm	K00002	AKR1A1, adh; alcohol dehydrogenase (NADP+) [EC:1.1.1.2]	map00010 Glycolysis / Gluconeogenesis; map00040 Pentose and glucuronate interconversions; map00053 Ascorbate and aldarate metabolism; map00561 Glycerolipid metabolism; map00620 Pyruvate metabolism; map01100 Metabolic pathways; map01240 Biosynthesis of cofactors	GO:0007275 multicellular organism development; GO:0007423 sensory organ development; GO:0007444 imaginal disc development; GO:0009888 tissue development; GO:0022416 chaeta development; GO:0032501 multicellular organismal process; GO:0032502 developmental process; GO:0035220 wing disc development; GO:0035295 tube development; GO:0048513 animal organ development; GO:0048731 system development; GO:0…			PF00248	PF00248 Aldo/keto reductase family	R
CGIg25156	P42578 FRIY_LYMST Yolk ferritin OS=Lymnaea stagnalis OX=6523 PE=1 SV=1	--	0.608081	0.000434764	0.639695	9.93286e-05	1.36484	0.00182607	0.770777	0.000254508	Up	25.4459	12.9	3	3	12262.9	13824.8	13519.3	22837.6	21607.8	20689	17301.3	18586.2	18169.9	13843.8	13921.4	13900.9	0.687322	0.774866	0.757747	1.28002	1.2111	1.1596	0.969719	1.04174	1.01841	0.775934	0.780281	0.779134	extracellular	K00522	FTH1; ferritin heavy chain [EC:1.16.3.2]	map04216 Ferroptosis; map04217 Necroptosis; map04978 Mineral absorption				PF00210	PF00210 Ferritin-like domain	P
CGIg28336	P11678 PERE_HUMAN Eosinophil peroxidase OS=Homo sapiens OX=9606 GN=EPX PE=1 SV=2	EPX	0.647873	0.000427534	0.984418	0.610387	1.71935	0.000244043	0.883742	0.0218727	Up	78.6209	8.5	5	3	5048.99	5742.22	5177.17	8108.5	8374.96	8163.94	9176.72	8835.21	9443.3	7783.2	8536.83	7943.3	0.839011	0.954207	0.860312	1.34742	1.3917	1.35663	1.52493	1.46818	1.56923	1.29336	1.4186	1.31997	extracellular	K10788	EPX, EPO; eosinophil peroxidase [EC:1.11.1.7]					PF03098	PF03098 Animal haem peroxidase	R
CGIg20941	XP_034312009.1 uncharacterized protein LOC117684348 [Crassostrea gigas]	--	0.366568	0.000423269	0.530279	0.0318166	4.17073	2.78828e-05	0.346846	0.00493276	Up	28.6306	12.1	3	0	7720.45	8197.26	7883.73	23843.4	23171.4	17915.6	29202.2	36306.6	33760.6	9721.31	15910.8	8799.14	0.23616	0.250745	0.241155	0.729345	0.708788	0.548018	0.893265	1.11058	1.0327	0.297364	0.486693	0.269156	extracellular	K23284	C1QL; C1q-related factor					PF02140; PF00386	PF02140 Galactose binding lectin domain; PF00386 C1q domain	R
CGIg08123	XP_011454303.1 uncharacterized protein LOC105347102 [Crassostrea gigas]	--	0.63175	0.000414823	0.609903	0.000822795	1.34255	0.00168561	0.719097	0.00317205	Up	20.803	28.8	5	5	49124.1	52853.5	56241.9	85701.6	80887.3	83857.6	70610.3	71513.2	70293.3	53750.9	45753.6	53243.6	0.637349	0.685736	0.729699	1.11192	1.04945	1.08799	0.916118	0.927833	0.912005	0.697379	0.59362	0.690798	plasma membrane
CGIg04212	XP_011453521.2 major egg antigen [Crassostrea gigas]	--	0.539466	0.000382618	0.687489	0.00209502	1.95859	0.000228801	0.650667	0.00102425	Up	27.1028	30.3	7	7	75799.5	73451.1	64163	137979	129376	128246	135120	142627	140242	92013	97302.8	82655.8	0.281263	0.272549	0.238084	0.511988	0.480066	0.475873	0.501379	0.529234	0.520384	0.341425	0.361054	0.306704	cytoplasm	K04455	HSPB1; heat shock protein beta-1	map04010 MAPK signaling pathway; map04370 VEGF signaling pathway	GO:0000302 response to reactive oxygen species; GO:0000902 cell morphogenesis; GO:0001558 regulation of cell growth; GO:0001654 eye development; GO:0001666 response to hypoxia; GO:0001932 regulation of protein phosphorylation; GO:0001934 positive regulation of protein phosphorylation; GO:0002064 epithelial cell development; GO:0002088 lens development in camera-type eye; GO:0002089 lens morphogen…	GO:0005576 extracellular region; GO:0005615 extracellular space; GO:0005622 intracellular anatomical structure; GO:0005634 nucleus; GO:0005654 nucleoplasm; GO:0005737 cytoplasm; GO:0005829 cytosol; GO:0030016 myofibril; GO:0030017 sarcomere; GO:0030018 Z disc; GO:0031674 I band; GO:0031974 membrane-enclosed lumen; GO:0031981 nuclear lumen; GO:0031982 vesicle; GO:0043226 organelle; GO:0043227 memb…	GO:0005198 structural molecule activity; GO:0005212 structural constituent of eye lens; GO:0005488 binding; GO:0005515 protein binding; GO:0042802 identical protein binding; GO:0051082 unfolded protein binding;	PF00011	PF00011 Hsp20/alpha crystallin family	O
CGIg26913	D6REC4 CFA99_HUMAN Cilia- and flagella-associated protein 99 OS=Homo sapiens OX=9606 GN=CFAP99 PE=3 SV=2	CFAP99	0.4828	0.00037223	0.671112	0.00166522	1.7044	0.00364911	0.815561	0.0627488	Up	86.8861	12.1	8	8	4947.7	4296.62	4802.3	8795.35	10377.4	9921.33	7129.01	9176.34	7635.68	6571.28	6278.72	6675.37	0.546289	0.474401	0.530235	0.971117	1.1458	1.09544	0.787133	1.01318	0.843076	0.725552	0.69325	0.737045	nucleus	K25608	CFAP99; cilia- and flagella-associated protein 99
CGIg21989	O01369 QCR7_FASHE Cytochrome b-c1 complex subunit 7 OS=Fasciola hepatica OX=6192 GN=UBCRBP PE=3 SV=2	UBCRBP	0.346568	0.000367371	0.343939	0.000362118	1.28763	0.0602856	0.770731	0.0561986	Up	13.9722	18.4	3	3	12616.3	9426.2	10646.2	32792.6	28716.8	32811.9	13369.2	13208.4	15513.3	9086.24	11984.4	11370.1	0.409574	0.30601	0.345615	1.06457	0.932256	1.0652	0.434016	0.428796	0.50362	0.294974	0.389059	0.369118	nucleus	K00417	QCR7, UQCRB; ubiquinol-cytochrome c reductase subunit 7	map00190 Oxidative phosphorylation; map01100 Metabolic pathways; map04260 Cardiac muscle contraction; map04714 Thermogenesis	GO:0006091 generation of precursor metabolites and energy; GO:0006119 oxidative phosphorylation; GO:0006122 mitochondrial electron transport, ubiquinol to cytochrome c; GO:0006139 nucleobase-containing compound metabolic process; GO:0006163 purine nucleotide metabolic process; GO:0006725 cellular aromatic compound metabolic process; GO:0006753 nucleoside phosphate metabolic process; GO:0006793 ph…	GO:0005622 intracellular anatomical structure; GO:0005737 cytoplasm; GO:0005739 mitochondrion; GO:0005740 mitochondrial envelope; GO:0005743 mitochondrial inner membrane; GO:0005746 mitochondrial respirasome; GO:0005750 mitochondrial respiratory chain complex III; GO:0016020 membrane; GO:0019866 organelle inner membrane; GO:0031090 organelle membrane; GO:0031966 mitochondrial membrane; GO:0031967…				C
CGIg17656	P04464 CALM_WHEAT Calmodulin OS=Triticum aestivum OX=4565 PE=1 SV=3	--	0.624251	0.00036713	0.337341	1.81081e-06	0.673381	0.0010971	0.802507	0.00258456	Up	16.8698	31.1	6	6	37249.9	35868.7	33011.6	58784.8	56874.3	54353.1	22721.1	25216.5	23528.5	18940.2	18853.6	19558.3	0.62601	0.602798	0.554782	0.987917	0.955811	0.91344	0.381843	0.42378	0.395411	0.318302	0.316847	0.32869	cytoplasm	K02183	CALM; calmodulin	map04014 Ras signaling pathway; map04015 Rap1 signaling pathway; map04020 Calcium signaling pathway; map04022 cGMP-PKG signaling pathway; map04024 cAMP signaling pathway; map04070 Phosphatidylinositol signaling system; map04114 Oocyte meiosis; map04218 Cellular senescence; map04261 Adrenergic signaling in cardiomyocytes; map04270 Vascular smooth muscle contraction; map04371 Apelin signaling pathw…				PF13499	PF13499 EF-hand domain pair	T
CGIg06703	XP_011456693.1 uncharacterized protein LOC105348829 [Crassostrea gigas]	--	0.516433	0.000366908	0.479054	0.000666943	0.886012	0.165686	1.04696	0.624903	Up	11.6837	20	2	2	10645.9	9633.25	10546	18931	18836.2	21921.4	8197.48	8843.26	10270.7	8652.35	9352.91	10588.8	0.444049	0.401811	0.439884	0.789626	0.785675	0.914361	0.341924	0.36886	0.428401	0.360897	0.390118	0.441667	mitochondria
CGIg20602	Q9WUD1 CHIP_MOUSE E3 ubiquitin-protein ligase CHIP OS=Mus musculus OX=10090 GN=Stub1 PE=1 SV=1	Stub1	0.66463	0.000366901	1.05357	0.296815	0.993371	0.871509	1.59577	0.000623933	Up	32.4947	19.1	5	5	8468.35	8373.85	7838.07	13065.8	12078.4	11989.6	7665.29	8216.8	8634.57	12198.7	13322.4	13601.8	0.732115	0.723944	0.677625	1.12958	1.04421	1.03654	0.662688	0.710367	0.746484	1.05461	1.15177	1.17592	cytoplasm	K09561	STUB1, CHIP; STIP1 homology and U-box containing protein 1 [EC:2.3.2.27]	map04120 Ubiquitin mediated proteolysis; map04141 Protein processing in endoplasmic reticulum	GO:0000003 reproduction; GO:0000209 protein polyubiquitination; GO:0006807 nitrogen compound metabolic process; GO:0006996 organelle organization; GO:0007010 cytoskeleton organization; GO:0007610 behavior; GO:0008152 metabolic process; GO:0009653 anatomical structure morphogenesis; GO:0009893 positive regulation of metabolic process; GO:0009966 regulation of signal transduction; GO:0009968 negati…	GO:0005622 intracellular anatomical structure; GO:0005737 cytoplasm;	GO:0003824 catalytic activity; GO:0004842 ubiquitin-protein transferase activity; GO:0005488 binding; GO:0005515 protein binding; GO:0016740 transferase activity; GO:0019787 ubiquitin-like protein transferase activity; GO:0019899 enzyme binding; GO:0030544 Hsp70 protein binding; GO:0031072 heat shock protein binding; GO:0031625 ubiquitin protein ligase binding; GO:0034450 ubiquitin-ubiquitin liga…	PF04564	PF04564 U-box domain	O
CGIg16748	XP_019919919.1 neuropeptide prohormone-4 isoform X1 [Crassostrea gigas]	--	0.429877	0.000331136	0.309466	0.0358818	0.949158	0.695289	0.758455	0.400431	Up	21.7819	19.6	3	3	2711.79	2812.95	2217.47	5994.84	5951.17	6064.24	2649.48	1862.8	2836.29	2950.57	695.046	1927.95	0.306579	0.318015	0.250694	0.677742	0.672805	0.685588	0.299535	0.210598	0.320654	0.333574	0.0785778	0.217962	extracellular	K04550	LRP1, CD91; low-density lipoprotein receptor-related protein 1 (alpha-2-macroglobulin receptor)	map04979 Cholesterol metabolism
CGIg26276	XP_034327465.1 uncharacterized protein LOC105322232 isoform X1 [Crassostrea gigas]	--	0.629994	0.00032768	0.578565	0.000120102	1.12676	0.0425461	0.815051	0.0054969	Up	70.4692	9.4	6	6	27280.9	24230.7	26455	41385.6	39836	42536.3	30455.5	28475.6	28918.5	22423.8	24916.5	24261.6	0.692225	0.614829	0.671268	1.05012	1.0108	1.07931	0.772778	0.72254	0.733778	0.568981	0.632231	0.615613	plasma membrane
CGIg22140	XP_034316045.1 uncharacterized protein LOC117685481 [Crassostrea gigas]	--	0.433433	0.00032623	0.698253	0.0220131	1.19981	0.107954	1.3427	0.0545288	Up	36.4435	3.5	1	0	16465.6	14587	15676	40276.7	35107.9	32426.1	20356.1	19816.9	15892.5	28692.3	22054.1	24532.8	0.535662	0.474546	0.509975	1.31029	1.14213	1.05489	0.662226	0.644685	0.517016	0.933421	0.717467	0.798103	extracellular
CGIg20737	P62993 GRB2_HUMAN Growth factor receptor-bound protein 2 OS=Homo sapiens OX=9606 GN=GRB2 PE=1 SV=1	GRB2	0.548115	0.000320136	0.496015	0.000288201	0.788239	0.0109902	1.14806	0.0864819	Up	25.3626	27.7	5	5	82610.4	86240.9	97900.6	161870	165605	159196	71854.1	69544.3	68866	72476.8	88670.8	80248.8	0.487387	0.508807	0.577597	0.955008	0.977041	0.939229	0.423927	0.4103	0.406297	0.427601	0.523143	0.473455	cytoplasm,nucleus	K04364	GRB2; growth factor receptor-bound protein 2	map04010 MAPK signaling pathway; map04012 ErbB signaling pathway; map04013 MAPK signaling pathway - fly; map04014 Ras signaling pathway; map04062 Chemokine signaling pathway; map04068 FoxO signaling pathway; map04072 Phospholipase D signaling pathway; map04150 mTOR signaling pathway; map04151 PI3K-Akt signaling pathway; map04320 Dorso-ventral axis formation; map04380 Osteoclast differentiation; m…	GO:0000003 reproduction; GO:0000165 MAPK cascade; GO:0000902 cell morphogenesis; GO:0001701 in utero embryonic development; GO:0001763 morphogenesis of a branching structure; GO:0001890 placenta development; GO:0001892 embryonic placenta development; GO:0001932 regulation of protein phosphorylation; GO:0002009 morphogenesis of an epithelium; GO:0002252 immune effector process; GO:0002253 activati…	GO:0005622 intracellular anatomical structure; GO:0005634 nucleus; GO:0005654 nucleoplasm; GO:0005730 nucleolus; GO:0005737 cytoplasm; GO:0005768 endosome; GO:0005829 cytosol; GO:0005886 plasma membrane; GO:0005911 cell-cell junction; GO:0008180 COP9 signalosome; GO:0009898 cytoplasmic side of plasma membrane; GO:0012505 endomembrane system; GO:0012506 vesicle membrane; GO:0016020 membrane; GO:00…	GO:0001784 phosphotyrosine residue binding; GO:0003824 catalytic activity; GO:0004672 protein kinase activity; GO:0004713 protein tyrosine kinase activity; GO:0004715 non-membrane spanning protein tyrosine kinase activity; GO:0005085 guanyl-nucleotide exchange factor activity; GO:0005102 signaling receptor binding; GO:0005126 cytokine receptor binding; GO:0005154 epidermal growth factor receptor …	PF00018; PF00017	PF00018 SH3 domain; PF00017 SH2 domain	T
CGIg07104	XP_011454137.2 uncharacterized protein LOC105346991 isoform X2 [Crassostrea gigas]	--	0.17114	0.000315425	1.19715	0.0358486	4.87696	0.000642436	1.43432	0.0125324	Up	22.4823	17.9	3	3	8447.32	6232.43	10523.4	50703.7	46620.2	49942	45258	36009.5	41647.4	52996.4	62538.8	60764.2	0.25447	0.187747	0.31701	1.52741	1.4044	1.50447	1.36337	1.08476	1.2546	1.59648	1.88394	1.83048	cytoplasm
CGIg08265	O43301 HS12A_HUMAN Heat shock 70 kDa protein 12A OS=Homo sapiens OX=9606 GN=HSPA12A PE=1 SV=2	HSPA12A	0.285385	0.00031414	0.21158	0.000362004	0.401244	0.00046569	1.84771	0.00789173	Up	21.9207	10.3	4	4	4192.16	3691.72	3762.16	16201.7	13095.5	11510.9	1782.39	1528.65	1361.85	3421.57	2746.64	2465.97	0.529502	0.466293	0.47519	2.04641	1.65406	1.45391	0.22513	0.193081	0.172013	0.432171	0.346922	0.311472	cytoplasm									O
CGIg24760	XP_019923831.2 EMILIN-2 isoform X2 [Crassostrea gigas]	--	0.406532	0.000311149	0.664976	0.00277256	1.50417	0.00496477	1.08746	0.23217	Up	21.4156	5.6	1	1	4941.71	5860.17	4575.72	11952.9	12912.5	12960.8	7562.01	7784.69	7783.86	7483	9019.71	8650.86	0.717649	0.851031	0.664499	1.73584	1.8752	1.88221	1.09818	1.13051	1.13039	1.0867	1.30987	1.2563	extracellular	K23284	C1QL; C1q-related factor		GO:0001932 regulation of protein phosphorylation; GO:0001933 negative regulation of protein phosphorylation; GO:0008285 negative regulation of cell population proliferation; GO:0009892 negative regulation of metabolic process; GO:0009966 regulation of signal transduction; GO:0009968 negative regulation of signal transduction; GO:0010563 negative regulation of phosphorus metabolic process; GO:0010…	GO:0005576 extracellular region; GO:0005615 extracellular space;	GO:0005488 binding; GO:0005515 protein binding; GO:0042802 identical protein binding;	PF00386	PF00386 C1q domain
CGIg06286	Q5R6Z8 CYBP_PONAB Calcyclin-binding protein OS=Pongo abelii OX=9601 GN=CACYBP PE=2 SV=1	CACYBP	0.549744	0.000303834	0.698091	0.000547614	1.59707	0.000873935	0.795109	0.00372436	Up	26.0357	36.6	8	8	56180.9	55222	49583	91883.8	98000.4	102954	91448.2	81146.9	84511.1	69432.4	66365.5	68629.6	0.631407	0.620629	0.557254	1.03266	1.10141	1.15708	1.02777	0.911995	0.949804	0.780338	0.74587	0.771315	nucleus	K04507	CACYBP, SIP; calcyclin binding protein	map04310 Wnt signaling pathway	GO:0006275 regulation of DNA replication; GO:0007275 multicellular organism development; GO:0007507 heart development; GO:0009719 response to endogenous stimulus; GO:0009725 response to hormone; GO:0009888 tissue development; GO:0009889 regulation of biosynthetic process; GO:0009891 positive regulation of biosynthetic process; GO:0009893 positive regulation of metabolic process; GO:0009987 cellul…	GO:0000151 ubiquitin ligase complex; GO:0005622 intracellular anatomical structure; GO:0005634 nucleus; GO:0005635 nuclear envelope; GO:0005641 nuclear envelope lumen; GO:0005654 nucleoplasm; GO:0005737 cytoplasm; GO:0005829 cytosol; GO:0012505 endomembrane system; GO:0019005 SCF ubiquitin ligase complex; GO:0030877 beta-catenin destruction complex; GO:0031461 cullin-RING ubiquitin ligase complex…	GO:0005488 binding; GO:0005515 protein binding; GO:0019899 enzyme binding; GO:0019904 protein domain specific binding; GO:0031625 ubiquitin protein ligase binding; GO:0042802 identical protein binding; GO:0042803 protein homodimerization activity; GO:0044389 ubiquitin-like protein ligase binding; GO:0046983 protein dimerization activity;	PF09032; PF04969	PF09032 Siah interacting protein, N terminal ; PF04969 CS domain	T
CGIg14174	XP_011437599.2 uncharacterized protein LOC105335447 isoform X2 [Crassostrea gigas]	--	0.509785	0.000299308	0.587503	0.000956854	1.8441	8.44687e-05	0.62494	0.000404142	Up	28.6666	3.9	1	1	48028.6	50294.7	54261.5	103692	91043.4	104576	95412.9	94497.2	91471.8	55257.6	63415.1	57173.9	0.395897	0.414576	0.447274	0.854728	0.750465	0.862017	0.786482	0.778934	0.753996	0.455485	0.522727	0.471281	extracellular	K23284	C1QL; C1q-related factor					PF00386	PF00386 C1q domain
CGIg03608	XP_034322719.1 uncharacterized protein LOC117688661 isoform X2 [Crassostrea gigas]	--	0.483283	0.000298024	0.811417	0.0608648	1.58646	0.000115964	1.05831	0.416004	Up	33.8145	12.9	4	1	5193.01	5020.24	5039.14	9308.5	11353.4	10898.1	7846.49	8537.31	7813.47	7772.59	9339.13	8496.52	0.491155	0.474815	0.476602	0.880399	1.0738	1.03074	0.742122	0.80746	0.738999	0.735133	0.883296	0.803602	cytoplasm
CGIg07842	Q2PFV2 CASP3_MACFA Caspase-3 OS=Macaca fascicularis OX=9541 GN=CASP3 PE=2 SV=1	CASP3	0.533201	0.000292559	0.24679	0.000353156	0.928426	0.299857	0.498528	0.00534099	Up	29.2307	19.1	5	5	19033.7	20643.4	17393.3	34269.2	36380.7	36383.6	17641.9	16556.6	18787.2	6816.81	9319.52	10278.5	0.600767	0.651576	0.548992	1.08165	1.1483	1.14839	0.556838	0.522582	0.592987	0.215162	0.294156	0.324424	cytoplasm	K04397	CASP7; caspase 7 [EC:3.4.22.60]	map04210 Apoptosis; map04214 Apoptosis - fly; map04215 Apoptosis - multiple species; map04668 TNF signaling pathway	GO:0000003 reproduction; GO:0002165 instar larval or pupal development; GO:0003006 developmental process involved in reproduction; GO:0006355 regulation of DNA-templated transcription; GO:0006357 regulation of transcription by RNA polymerase II; GO:0006508 proteolysis; GO:0006807 nitrogen compound metabolic process; GO:0006810 transport; GO:0006915 apoptotic process; GO:0006950 response to stress…	GO:0005622 intracellular anatomical structure; GO:0005634 nucleus; GO:0005654 nucleoplasm; GO:0005737 cytoplasm; GO:0005739 mitochondrion; GO:0005829 cytosol; GO:0031974 membrane-enclosed lumen; GO:0031981 nuclear lumen; GO:0043226 organelle; GO:0043227 membrane-bounded organelle; GO:0043229 intracellular organelle; GO:0043231 intracellular membrane-bounded organelle; GO:0043233 organelle lumen; …	GO:0003824 catalytic activity; GO:0004175 endopeptidase activity; GO:0004190 aspartic-type endopeptidase activity; GO:0004197 cysteine-type endopeptidase activity; GO:0005488 binding; GO:0005515 protein binding; GO:0008233 peptidase activity; GO:0008234 cysteine-type peptidase activity; GO:0016787 hydrolase activity; GO:0019904 protein domain specific binding; GO:0070001 aspartic-type peptidase a…	PF00656	PF00656 Caspase domain	D
CGIg28149	Uncharacterized protein	--	0.503872	0.000282123	0.728177	0.00113514	1.2841	0.061408	1.12543	0.221294	Up	10.4051	12.4	1	1	16938.5	18863.2	15736.7	32845.1	35593	33846.6	22856.6	24536.6	18787.2	23486.9	26054.1	24940.4	0.445465	0.496084	0.413858	0.863792	0.936058	0.89013	0.601106	0.645288	0.494084	0.617681	0.685196	0.655906	extracellular
CGIg06366	XP_034301076.1 F-box/LRR-repeat protein 4 [Crassostrea gigas]	--	0.557028	0.000279454	0.417868	0.000198078	1.2846	0.63493	0.583976	0.219192	Up	33.8018	6.4	2	2	11381.5	12391	11311.9	19966.9	20374.7	22643.4	24821.3	9664.25	10583.7	8722.99	7972.71	9623.67	0.489078	0.532457	0.486089	0.858005	0.875527	0.973019	1.06661	0.415286	0.454796	0.374839	0.342598	0.413543	cytoplasm	K10270	FBXL4; F-box and leucine-rich repeat protein 4					PF00059	PF00059 Lectin C-type domain	M
CGIg22001	XP_019923494.2 uncharacterized protein LOC105329895 isoform X1 [Crassostrea gigas]	--	0.41113	0.000274949	0.733812	0.00420639	1.21125	0.138122	1.47357	0.0110834	Up	66.4476	10.8	5	1	10562.6	11878.5	9565.81	24018.9	26348.7	27483.6	14587.3	11052.1	13129	19091	17885.5	20151.7	0.517637	0.582125	0.468786	1.17708	1.29126	1.34687	0.714871	0.541626	0.643406	0.93558	0.876506	0.987562	Golgi apparatus
CGIg18480	Q13277 STX3_HUMAN Syntaxin-3 OS=Homo sapiens OX=9606 GN=STX3 PE=1 SV=3	STX3	0.633432	0.000269053	0.657057	0.00334663	1.73742	6.15795e-06	0.597031	0.000907001	Up	35.6187	6.4	2	1	24983.9	24359.6	24603.4	37620.1	41832.8	37287.1	42313.6	44191.1	41972.4	23639	24597.6	28468.2	0.616944	0.601526	0.607546	0.928976	1.033	0.920753	1.04488	1.09124	1.03645	0.583733	0.607403	0.702984	cytoplasm	K04560	STX1A; syntaxin 1A	map04130 SNARE interactions in vesicular transport; map04721 Synaptic vesicle cycle; map04911 Insulin secretion	GO:0000278 mitotic cell cycle; GO:0000281 mitotic cytokinesis; GO:0000910 cytokinesis; GO:0001956 positive regulation of neurotransmitter secretion; GO:0002791 regulation of peptide secretion; GO:0006810 transport; GO:0006836 neurotransmitter transport; GO:0006886 intracellular protein transport; GO:0006887 exocytosis; GO:0006904 vesicle docking involved in exocytosis; GO:0006906 vesicle fusion; …	GO:0005622 intracellular anatomical structure; GO:0005634 nucleus; GO:0005635 nuclear envelope; GO:0005652 nuclear lamina; GO:0005654 nucleoplasm; GO:0005737 cytoplasm; GO:0005813 centrosome; GO:0005815 microtubule organizing center; GO:0005829 cytosol; GO:0005856 cytoskeleton; GO:0005886 plasma membrane; GO:0008021 synaptic vesicle; GO:0012505 endomembrane system; GO:0012506 vesicle membrane; GO…	GO:0000149 SNARE binding; GO:0005102 signaling receptor binding; GO:0005246 calcium channel regulator activity; GO:0005484 SNAP receptor activity; GO:0005488 binding; GO:0005515 protein binding; GO:0008092 cytoskeletal protein binding; GO:0008200 ion channel inhibitor activity; GO:0016247 channel regulator activity; GO:0016248 channel inhibitor activity; GO:0017022 myosin binding; GO:0017081 chlo…	PF00804	PF00804 Syntaxin	U
CGIg04257	XP_034334547.1 uncharacterized protein LOC105328059 [Crassostrea gigas]	--	0.638388	0.000266434	0.950088	0.244314	1.39497	0.000454579	1.06688	0.114737	Up	69.8693	7.3	4	3	29048.5	31351.5	31286.8	46034.2	47163	50425.2	43956.4	42787.4	41156.1	45517.1	43443.7	47493.2	0.655427	0.707389	0.70593	1.03868	1.06415	1.13775	0.991796	0.965421	0.928613	1.02701	0.980227	1.0716	mitochondria
CGIg15009	Q8IYE0 CC146_HUMAN Coiled-coil domain-containing protein 146 OS=Homo sapiens OX=9606 GN=CCDC146 PE=1 SV=2	CCDC146	0.605114	0.000261788	0.86471	0.0041506	1.58077	0.000541913	0.903992	0.0317194	Up	113.011	14.6	16	16	21186.7	18770.7	19847.4	32976.4	31673	34182.9	29936.4	31509.2	33092.1	28811.6	27865.3	28784.4	0.657038	0.582113	0.615505	1.02266	0.982236	1.06007	0.928381	0.977158	1.02625	0.893499	0.864154	0.892656	cytoplasm					GO:0005622 intracellular anatomical structure; GO:0005737 cytoplasm; GO:0005814 centriole; GO:0005815 microtubule organizing center; GO:0005856 cytoskeleton; GO:0015630 microtubule cytoskeleton; GO:0043226 organelle; GO:0043228 non-membrane-bounded organelle; GO:0043229 intracellular organelle; GO:0043232 intracellular non-membrane-bounded organelle;
CGIg21007	Q28BT4 CALU_XENTR Calumenin OS=Xenopus tropicalis OX=8364 GN=calu PE=2 SV=1	calu	0.593087	0.000257815	0.834908	0.0178473	1.59412	0.000100348	0.883077	0.0236587	Up	36.9514	23.2	6	6	111493	118224	106657	180880	200403	185875	180026	177556	178639	167498	157694	148334	0.593468	0.629293	0.567727	0.96281	1.06673	0.989394	0.958263	0.945117	0.950881	0.891576	0.839388	0.789568	extracellular	K23899	RCN2; reticulocalbin-2		GO:0006996 organelle organization; GO:0007030 Golgi organization; GO:0009987 cellular process; GO:0010256 endomembrane system organization; GO:0016043 cellular component organization; GO:0071840 cellular component organization or biogenesis;	GO:0005622 intracellular anatomical structure; GO:0005634 nucleus; GO:0005730 nucleolus; GO:0005737 cytoplasm; GO:0005783 endoplasmic reticulum; GO:0005788 endoplasmic reticulum lumen; GO:0012505 endomembrane system; GO:0031974 membrane-enclosed lumen; GO:0031981 nuclear lumen; GO:0043226 organelle; GO:0043227 membrane-bounded organelle; GO:0043228 non-membrane-bounded organelle; GO:0043229 intra…	GO:0005488 binding; GO:0005509 calcium ion binding; GO:0043167 ion binding; GO:0043169 cation binding; GO:0046872 metal ion binding;	PF13202; PF13833	PF13202 EF hand; PF13833 EF-hand domain pair	TU
CGIg24309	Q91YJ2 SNX4_MOUSE Sorting nexin-4 OS=Mus musculus OX=10090 GN=Snx4 PE=1 SV=1	Snx4	0.607518	0.000252095	0.665561	0.000931914	1.29561	0.00294027	0.845581	0.0216612	Up	50.301	19	8	8	18616.8	17815.9	19581.9	32569.1	30106.8	29526.5	22805.1	24747.1	25020.7	20768.8	19086.2	21511.2	0.69078	0.661062	0.726591	1.20848	1.11712	1.09559	0.846188	0.918248	0.928399	0.770631	0.7082	0.798179	cytoplasm	K17919	SNX4; sorting nexin-4	map04144 Endocytosis	GO:0002682 regulation of immune system process; GO:0002684 positive regulation of immune system process; GO:0002694 regulation of leukocyte activation; GO:0002696 positive regulation of leukocyte activation; GO:0002697 regulation of immune effector process; GO:0002699 positive regulation of immune effector process; GO:0002703 regulation of leukocyte mediated immunity; GO:0002705 positive regulati…	GO:0005622 intracellular anatomical structure; GO:0005737 cytoplasm; GO:0005768 endosome; GO:0005769 early endosome; GO:0005856 cytoskeleton; GO:0005868 cytoplasmic dynein complex; GO:0005875 microtubule associated complex; GO:0005886 plasma membrane; GO:0010008 endosome membrane; GO:0012505 endomembrane system; GO:0015630 microtubule cytoskeleton; GO:0016020 membrane; GO:0019898 extrinsic compon…	GO:0005102 signaling receptor binding; GO:0005154 epidermal growth factor receptor binding; GO:0005158 insulin receptor binding; GO:0005488 binding; GO:0005515 protein binding; GO:0005543 phospholipid binding; GO:0008289 lipid binding; GO:0035091 phosphatidylinositol binding; GO:0043167 ion binding; GO:0043168 anion binding; GO:0044877 protein-containing complex binding; GO:0070851 growth factor …	PF00787	PF00787 PX domain	U
CGIg26632	D3ZAT9 FAXC_RAT Failed axon connections homolog OS=Rattus norvegicus OX=10116 GN=Faxc PE=3 SV=1	Faxc	0.613032	0.000242529	0.928228	0.0529492	1.14227	0.120762	1.32557	0.00946972	Up	34.7232	13.4	3	3	11191.1	12776.1	11609.2	19352.5	19424.1	19256.8	14672.9	12199.8	13765.2	18549.1	18330.7	16988.5	0.485769	0.554565	0.503916	0.840028	0.843136	0.835874	0.636899	0.52955	0.5975	0.805155	0.795674	0.737413	endoplasmic reticulum							PF17172; PF17171	PF17172 Glutathione S-transferase N-terminal domain ; PF17171 Glutathione S-transferase, C-terminal domain	T
CGIg27489	Q5ZT34 BIOC_LEGPH Malonyl-[acyl-carrier protein] O-methyltransferase OS=Legionella pneumophila subsp. pneumophila (strain Philadelphia 1 / ATCC 33152 / DSM 7513) OX=272624 GN=bioC PE=3 SV=2	bioC	0.633322	0.000237698	0.606363	1.78835e-06	0.987049	0.779374	0.969995	0.21389	Up	38.4891	18.7	5	1	111942	99178.6	102960	162649	166173	167104	102438	100516	107058	100207	98809	101695	0.82961	0.735016	0.763038	1.2054	1.23151	1.23841	0.759175	0.744931	0.793413	0.742638	0.732277	0.753666	cytoplasm	K00543	ASMT; acetylserotonin O-methyltransferase [EC:2.1.1.4]	map00380 Tryptophan metabolism; map01100 Metabolic pathways				PF13847	PF13847 Methyltransferase domain	IR
CGIg11176	P70122 SBDS_MOUSE Ribosome maturation protein SBDS OS=Mus musculus OX=10090 GN=Sbds PE=1 SV=4	Sbds	0.597483	0.000232119	0.562874	7.63013e-05	1.06794	0.118185	0.882144	0.00706014	Up	28.5992	22.3	7	7	18292.3	16941.7	17213.8	27323.3	30220.2	30237.7	18831.1	19330.9	17849	16668.2	16255.4	16486.1	0.844678	0.78231	0.794873	1.2617	1.39547	1.39627	0.869555	0.892633	0.824207	0.769683	0.750619	0.761273	cytoplasm	K14574	SDO1, SBDS; ribosome maturation protein SDO1	map03008 Ribosome biogenesis in eukaryotes	GO:0000226 microtubule cytoskeleton organization; GO:0000278 mitotic cell cycle; GO:0001501 skeletal system development; GO:0001503 ossification; GO:0001701 in utero embryonic development; GO:0001824 blastocyst development; GO:0001832 blastocyst growth; GO:0001833 inner cell mass cell proliferation; GO:0002376 immune system process; GO:0002520 immune system development; GO:0006139 nucleobase-cont…	GO:0000922 spindle pole; GO:0005622 intracellular anatomical structure; GO:0005634 nucleus; GO:0005654 nucleoplasm; GO:0005730 nucleolus; GO:0005737 cytoplasm; GO:0005819 spindle; GO:0005829 cytosol; GO:0005856 cytoskeleton; GO:0015630 microtubule cytoskeleton; GO:0031974 membrane-enclosed lumen; GO:0031981 nuclear lumen; GO:0043226 organelle; GO:0043227 membrane-bounded organelle; GO:0043228 non…	GO:0003676 nucleic acid binding; GO:0003723 RNA binding; GO:0005488 binding; GO:0005515 protein binding; GO:0008017 microtubule binding; GO:0008092 cytoskeletal protein binding; GO:0015631 tubulin binding; GO:0019843 rRNA binding; GO:0043021 ribonucleoprotein complex binding; GO:0043022 ribosome binding; GO:0044877 protein-containing complex binding; GO:0097159 organic cyclic compound binding; GO…	PF09377	PF09377 SBDS protein, domain II	J
CGIg10097	D3ZQG6 TRIM2_RAT Tripartite motif-containing protein 2 OS=Rattus norvegicus OX=10116 GN=Trim2 PE=1 SV=2	Trim2	0.153984	0.00022722	0.643956	0.031421	1.04244	0.899618	4.01171	0.192991	Up	58.9721	2.3	1	1	529.867		591.519	4050.52	3580.65	3292.57	858.422		310.557	2613.71	2075.9		0.303573		0.338895	2.32064	2.05144	1.88639	0.49181		0.177925	1.49745	1.18933		nucleus	K12021	TRIM45; tripartite motif-containing protein 45					PF13445; PF00917	PF13445 RING-type zinc-finger; PF00917 MATH domain	O
CGIg07494	XP_034299523.1 uncharacterized protein LOC117680966 isoform X5 [Crassostrea gigas]	--	0.577559	0.000227087	0.63649	0.00125787	1.31755	0.00675651	0.836425	0.0487351	Up	63.4335	1.8	1	1	2831.81	3028.38	3156.64	4949.24	5175.54	5487.17	4179.89	3632.01	4068.24	3557.8	3026.55	3352.5	0.715031	0.764665	0.79705	1.24968	1.30682	1.38551	1.05542	0.917081	1.02723	0.898344	0.764204	0.846504	nucleus	K24030	ZMYND10; zinc finger MYND domain-containing protein 10					PF01753	PF01753 MYND finger	O
CGIg09461	XP_011431306.1 isatin hydrolase [Crassostrea gigas]	--	0.613036	0.000227	0.758476	0.00141927	1.14883	0.0557957	1.07696	0.208028	Up	31.3724	3.5	1	1	56473.7	63636.2	63023	98315.9	99793	100622	70461.2	65713.8	74213.8	80744	72055.2	73780.9	0.6217	0.700549	0.693799	1.08233	1.09859	1.10771	0.775684	0.723421	0.816995	0.888884	0.793231	0.812229	extracellular
CGIg14836	XP_011412627.3 proline rich transmembrane protein 1B [Crassostrea gigas]	--	0.55448	0.000223534	1.13571	0.0989227	2.04091	0.000147363	1.00359	0.960263	Up	20.9753	6.1	1	1	15436.4	16641	16856.6	27359	29814.9	31078.1	31556.9	36149	32163.9	32364.7	36464.3	31399.8	0.597562	0.644193	0.652538	1.0591	1.15417	1.20307	1.22161	1.39937	1.2451	1.25288	1.41158	1.21552	plasma membrane
CGIg06233	Q9NWM8 FKB14_HUMAN Peptidyl-prolyl cis-trans isomerase FKBP14 OS=Homo sapiens OX=9606 GN=FKBP14 PE=1 SV=1	FKBP14	0.62397	0.000203834	0.594078	0.00028017	1.17669	0.025284	0.809127	0.0155903	Up	23.6527	22.7	5	5	23077.5	25325.6	25902.9	39088.1	40313.2	39684.3	27474.2	29469.1	30492	22170.4	23004	25571.8	0.678993	0.745137	0.762124	1.15006	1.18611	1.16761	0.808355	0.867049	0.897146	0.652305	0.676831	0.752383	extracellular	K09577	FKBP14; FK506-binding protein 14 [EC:5.2.1.8]		GO:0000413 protein peptidyl-prolyl isomerization; GO:0002009 morphogenesis of an epithelium; GO:0002165 instar larval or pupal development; GO:0006457 protein folding; GO:0006807 nitrogen compound metabolic process; GO:0007275 multicellular organism development; GO:0007423 sensory organ development; GO:0007444 imaginal disc development; GO:0007472 wing disc morphogenesis; GO:0007476 imaginal disc…	GO:0005576 extracellular region; GO:0005615 extracellular space; GO:0005622 intracellular anatomical structure; GO:0005737 cytoplasm; GO:0005783 endoplasmic reticulum; GO:0012505 endomembrane system; GO:0043226 organelle; GO:0043227 membrane-bounded organelle; GO:0043229 intracellular organelle; GO:0043231 intracellular membrane-bounded organelle;	GO:0003755 peptidyl-prolyl cis-trans isomerase activity; GO:0003824 catalytic activity; GO:0005488 binding; GO:0005527 macrolide binding; GO:0005528 FK506 binding; GO:0016853 isomerase activity; GO:0016859 cis-trans isomerase activity; GO:0097159 organic cyclic compound binding; GO:0140096 catalytic activity, acting on a protein; GO:1901363 heterocyclic compound binding;	PF00254; PF13499	PF00254 FKBP-type peptidyl-prolyl cis-trans isomerase; PF13499 EF-hand domain pair	O
CGIg22465	Q6KAR6 EXOC3_MOUSE Exocyst complex component 3 OS=Mus musculus OX=10090 GN=Exoc3 PE=1 SV=2	Exoc3	0.623676	0.00019934	0.75039	0.000405954	1.03569	0.416045	1.16171	0.00853039	Up	88.7621	9.8	7	7	12955.1	14517.3	13174.1	21910.8	21397.6	21863.9	13657.6	13926.9	14512.8	16318.6	17007.8	15578.4	0.660516	0.740166	0.671684	1.11713	1.09096	1.11474	0.696334	0.710064	0.739938	0.832005	0.867144	0.794265	cytoplasm	K06110	EXOC3, SEC6; exocyst complex component 3		GO:0000003 reproduction; GO:0001654 eye development; GO:0001667 ameboidal-type cell migration; GO:0001745 compound eye morphogenesis; GO:0001751 compound eye photoreceptor cell differentiation; GO:0001754 eye photoreceptor cell differentiation; GO:0002064 epithelial cell development; GO:0002065 columnar/cuboidal epithelial cell differentiation; GO:0002066 columnar/cuboidal epithelial cell develop…	GO:0000145 exocyst; GO:0005622 intracellular anatomical structure; GO:0005737 cytoplasm; GO:0005829 cytosol; GO:0005911 cell-cell junction; GO:0005912 adherens junction; GO:0005915 zonula adherens; GO:0005938 cell cortex; GO:0012505 endomembrane system; GO:0012506 vesicle membrane; GO:0016020 membrane; GO:0016028 rhabdomere; GO:0030054 cell junction; GO:0030141 secretory granule; GO:0030659 cytop…	GO:0000149 SNARE binding; GO:0005488 binding; GO:0005515 protein binding;			U
CGIg06830	XP_034301934.1 uncharacterized protein LOC117681453 [Crassostrea gigas]	--	0.659099	0.000194616	0.400944	6.59691e-05	0.185451	0.000114697	3.28023	0.000579273	Up	18.342	6.1	1	1	24979.3	26615.9	25585.5	37158.9	39368.1	40573.2	4854.19	3835.03	5623.96	15059.2	17120.2	14771.2	1.07126	1.14144	1.09725	1.59359	1.68833	1.74001	0.208176	0.164468	0.241188	0.645825	0.734214	0.633474	extracellular							PF09458	PF09458 H-type lectin domain
CGIg08783	XP_034303329.1 uncharacterized protein LOC105339529 [Crassostrea gigas]	--	0.653021	0.000190435	0.928327	0.0173674	1.16984	0.115093	1.2152	0.0488855	Up	19.6017	17	3	3	43209.9	42888.6	46741	70072.7	66253	67097.5	53035.2	57309.2	45056	63509	63444.4	61889.8	0.699692	0.694488	0.75687	1.13468	1.07282	1.0865	0.85879	0.927999	0.729584	1.02839	1.02735	1.00217	plasma membrane
CGIg18252	P61022 CHP1_MOUSE Calcineurin B homologous protein 1 OS=Mus musculus OX=10090 GN=Chp1 PE=1 SV=2	Chp1	0.653319	0.00018859	0.502966	9.66893e-06	0.78828	0.00489773	0.976637	0.557503	Up	21.8706	6.3	1	1	34987.1	35126.6	38561.8	55970	55452.2	54921.4	29894.6	28616.8	27155.3	26623.1	28861.2	28181	0.807248	0.810464	0.889724	1.29138	1.27943	1.26718	0.689749	0.660267	0.626546	0.614267	0.665905	0.650211	cytoplasm,nucleus	K17610	CHP, CHP1; calcineurin B homologous protein 1		GO:0000226 microtubule cytoskeleton organization; GO:0001578 microtubule bundle formation; GO:0001932 regulation of protein phosphorylation; GO:0001933 negative regulation of protein phosphorylation; GO:0002028 regulation of sodium ion transport; GO:0006022 aminoglycan metabolic process; GO:0006026 aminoglycan catabolic process; GO:0006027 glycosaminoglycan catabolic process; GO:0006082 organic a…	GO:0000139 Golgi membrane; GO:0005622 intracellular anatomical structure; GO:0005634 nucleus; GO:0005737 cytoplasm; GO:0005783 endoplasmic reticulum; GO:0005794 Golgi apparatus; GO:0005829 cytosol; GO:0005856 cytoskeleton; GO:0005886 plasma membrane; GO:0012505 endomembrane system; GO:0015630 microtubule cytoskeleton; GO:0016020 membrane; GO:0030133 transport vesicle; GO:0031090 organelle membran…	GO:0005215 transporter activity; GO:0005488 binding; GO:0005509 calcium ion binding; GO:0005515 protein binding; GO:0008017 microtubule binding; GO:0008092 cytoskeletal protein binding; GO:0015459 potassium channel regulator activity; GO:0015631 tubulin binding; GO:0016247 channel regulator activity; GO:0019899 enzyme binding; GO:0019900 kinase binding; GO:0043167 ion binding; GO:0043169 cation b…	PF13499	PF13499 EF-hand domain pair	T
CGIg07087	XP_011443504.2 uncharacterized protein LOC105339600 [Crassostrea gigas]	--	0.566253	0.000185868	0.358046	0.000789684	0.945916	0.413052	0.66846	0.0278688	Up	9.58053	15.7	1	1	27016	30560.2	29381.1	48921.6	52688.9	51955.6	29684.2	27632.1	24938.1	19170.7	14613.2	21199.9	0.670642	0.758623	0.729354	1.21442	1.30794	1.28974	0.736877	0.685936	0.61906	0.47589	0.362757	0.526264	cytoplasm,nucleus
CGIg10729	P42575 CASP2_HUMAN Caspase-2 OS=Homo sapiens OX=9606 GN=CASP2 PE=1 SV=2	CASP2	0.025512	0.000174748	0.0250129	1.26189e-06	0.867726	0.792586	1.12989	0.315767	Up	72.0977	1.2	1	1	3342.36	1368.78	2837.88	98166.6	105214	92519.5	1906.32	2112.43	2531.72	2743.26	2158.05	2500.02	0.205062	0.083978	0.174111	6.02278	6.45517	5.67631	0.116958	0.129603	0.155328	0.168306	0.132402	0.153383	cytoplasm	K02186	CASP2; caspase 2 [EC:3.4.22.55]	map04210 Apoptosis	GO:0000003 reproduction; GO:0000075 cell cycle checkpoint signaling; GO:0000077 DNA damage checkpoint signaling; GO:0000278 mitotic cell cycle; GO:0001554 luteolysis; GO:0001654 eye development; GO:0003006 developmental process involved in reproduction; GO:0003407 neural retina development; GO:0006508 proteolysis; GO:0006807 nitrogen compound metabolic process; GO:0006915 apoptotic process; GO:00…	GO:0005622 intracellular anatomical structure; GO:0005634 nucleus; GO:0005737 cytoplasm; GO:0005739 mitochondrion; GO:0005829 cytosol; GO:0016020 membrane; GO:0043226 organelle; GO:0043227 membrane-bounded organelle; GO:0043229 intracellular organelle; GO:0043231 intracellular membrane-bounded organelle;	GO:0003824 catalytic activity; GO:0004175 endopeptidase activity; GO:0004197 cysteine-type endopeptidase activity; GO:0005488 binding; GO:0005515 protein binding; GO:0008233 peptidase activity; GO:0008234 cysteine-type peptidase activity; GO:0016787 hydrolase activity; GO:0019899 enzyme binding; GO:0019904 protein domain specific binding; GO:0042802 identical protein binding; GO:0097153 cysteine-…	PF00619; PF00656	PF00619 Caspase recruitment domain; PF00656 Caspase domain	D
CGIg02316	Q91WQ9 CALL4_MOUSE Calmodulin-like protein 4 OS=Mus musculus OX=10090 GN=Calml4 PE=1 SV=2	Calml4	0.493482	0.000172657	0.337907	2.54694e-05	0.90738	0.154411	0.754634	0.00626572	Up	17.635	28	4	4	16080.4	17010	18078.9	34670.4	36875.7	32144.1	14374.4	15298.9	16756.6	12218.4	11049	11770.1	0.471396	0.498646	0.529982	1.01636	1.08101	0.942301	0.421384	0.448487	0.491219	0.358183	0.323902	0.345041	cytoplasm	K02183	CALM; calmodulin	map04014 Ras signaling pathway; map04015 Rap1 signaling pathway; map04020 Calcium signaling pathway; map04022 cGMP-PKG signaling pathway; map04024 cAMP signaling pathway; map04070 Phosphatidylinositol signaling system; map04114 Oocyte meiosis; map04218 Cellular senescence; map04261 Adrenergic signaling in cardiomyocytes; map04270 Vascular smooth muscle contraction; map04371 Apelin signaling pathw…				PF13499	PF13499 EF-hand domain pair	T
CGIg22754	P80457 XDH_BOVIN Xanthine dehydrogenase/oxidase OS=Bos taurus OX=9913 GN=XDH PE=1 SV=4	XDH	0.47749	0.000171014	0.527468	0.000263939	2.70125	5.10376e-06	0.408947	4.78998e-06	Up	131.343	3.5	4	4	2526.25	2698.82	2777.82	5989.08	5108.4	5662.85	7196.58	7071.04	7350.19	2834.07	2925.6	3080.87	0.481898	0.514816	0.529886	1.14245	0.974457	1.08022	1.37279	1.34884	1.40209	0.540616	0.558075	0.587694	mitochondria	K00106	XDH; xanthine dehydrogenase/oxidase [EC:1.17.1.4 1.17.3.2]	map00230 Purine metabolism; map00232 Caffeine metabolism; map00983 Drug metabolism - other enzymes; map01100 Metabolic pathways; map04146 Peroxisome	GO:0000302 response to reactive oxygen species; GO:0001932 regulation of protein phosphorylation; GO:0001933 negative regulation of protein phosphorylation; GO:0001934 positive regulation of protein phosphorylation; GO:0001936 regulation of endothelial cell proliferation; GO:0001937 negative regulation of endothelial cell proliferation; GO:0002237 response to molecule of bacterial origin; GO:0006…	GO:0002197 xanthine dehydrogenase complex; GO:0005576 extracellular region; GO:0005615 extracellular space; GO:0005622 intracellular anatomical structure; GO:0005737 cytoplasm; GO:0005777 peroxisome; GO:0005783 endoplasmic reticulum; GO:0005829 cytosol; GO:0012505 endomembrane system; GO:0016528 sarcoplasm; GO:0016529 sarcoplasmic reticulum; GO:0032991 protein-containing complex; GO:0042579 micro…	GO:0000166 nucleotide binding; GO:0003824 catalytic activity; GO:0004854 xanthine dehydrogenase activity; GO:0004855 xanthine oxidase activity; GO:0005488 binding; GO:0005515 protein binding; GO:0016491 oxidoreductase activity; GO:0016661 oxidoreductase activity, acting on other nitrogenous compounds as donors; GO:0016662 oxidoreductase activity, acting on other nitrogenous compounds as donors, c…	PF01799; PF01315	PF01799 [2Fe-2S] binding domain; PF01315 Aldehyde oxidase and xanthine dehydrogenase, a/b hammerhead domain	F
CGIg09900	Q6GQ52 TI10B_XENLA Mitochondrial import inner membrane translocase subunit Tim10-B OS=Xenopus laevis OX=8355 GN=timm10-b PE=3 SV=1	timm10-b	0.263721	0.000169516	0.537998	0.00103652	3.50585	7.80606e-05	0.581893	0.000129493	Up	10.5763	12	1	1	12917.2	15154.2	16559.9	49395	61428.4	58413.3	51552	54436.8	50481.5	30248.2	31959.8	28841.1	0.256298	0.300683	0.328574	0.980075	1.21884	1.15901	1.02287	1.08011	1.00163	0.600171	0.634132	0.572252	extracellular	K17778	TIM10; mitochondrial import inner membrane translocase subunit TIM10		GO:0000003 reproduction; GO:0003008 system process; GO:0006605 protein targeting; GO:0006626 protein targeting to mitochondrion; GO:0006810 transport; GO:0006839 mitochondrial transport; GO:0006886 intracellular protein transport; GO:0006996 organelle organization; GO:0007005 mitochondrion organization; GO:0007006 mitochondrial membrane organization; GO:0007007 inner mitochondrial membrane organi…	GO:0005622 intracellular anatomical structure; GO:0005737 cytoplasm; GO:0005739 mitochondrion; GO:0005740 mitochondrial envelope; GO:0005743 mitochondrial inner membrane; GO:0005744 TIM23 mitochondrial import inner membrane translocase complex; GO:0005758 mitochondrial intermembrane space; GO:0016020 membrane; GO:0019866 organelle inner membrane; GO:0031090 organelle membrane; GO:0031966 mitochon…	GO:0005215 transporter activity; GO:0005488 binding; GO:0005515 protein binding; GO:0008270 zinc ion binding; GO:0042802 identical protein binding; GO:0042803 protein homodimerization activity; GO:0043167 ion binding; GO:0043169 cation binding; GO:0046872 metal ion binding; GO:0046914 transition metal ion binding; GO:0046983 protein dimerization activity; GO:0051087 protein-folding chaperone bind…	PF02953	PF02953 Tim10/DDP family zinc finger	U
CGIg16006	Q8LPL3 ASO_ARATH L-ascorbate oxidase OS=Arabidopsis thaliana OX=3702 GN=AAO PE=1 SV=1	AAO	0.480398	0.000168433	0.666705	0.014741	1.25221	0.039594	1.10829	0.420496	Up	78.8507	10.5	5	5	9088.1	8909.87	8394.69	20095.4	17633.2	17210.6	12266.5	11123.7	9659.01	13276.9	13178.1	10173.3	0.554284	0.543414	0.511993	1.22562	1.07545	1.04967	0.748134	0.678437	0.589104	0.809761	0.803731	0.620468	peroxisome							PF07732; PF00394; PF07731	PF07732 Multicopper oxidase; PF00394 Multicopper oxidase; PF07731 Multicopper oxidase	Q
CGIg07380	XP_019925353.2 BAG family molecular chaperone regulator 1 isoform X1 [Crassostrea gigas]	--	0.486405	0.00016687	0.555002	0.0036734	2.07104	0.000280054	0.550946	0.00417065	Up	24.8047	19.7	4	4	8619.22	7375.77	7687.23	15449.5	16441.4	16797.5	15175.5	16509.6	17361.6	10146.3	9454.92	7420.88	0.362286	0.310021	0.323112	0.649377	0.691069	0.706037	0.637862	0.693937	0.729749	0.426473	0.397412	0.311917	cytoplasm	K09555	BAG1; BCL2-associated athanogene 1	map04141 Protein processing in endoplasmic reticulum	GO:0001932 regulation of protein phosphorylation; GO:0001933 negative regulation of protein phosphorylation; GO:0006355 regulation of DNA-templated transcription; GO:0006357 regulation of transcription by RNA polymerase II; GO:0006457 protein folding; GO:0006458 'de novo' protein folding; GO:0007154 cell communication; GO:0007165 signal transduction; GO:0007166 cell surface receptor signaling pat…	GO:0005622 intracellular anatomical structure; GO:0005634 nucleus; GO:0005737 cytoplasm; GO:0005739 mitochondrion; GO:0005829 cytosol; GO:0043226 organelle; GO:0043227 membrane-bounded organelle; GO:0043229 intracellular organelle; GO:0043231 intracellular membrane-bounded organelle; GO:0048471 perinuclear region of cytoplasm;	GO:0000166 nucleotide binding; GO:0000774 adenyl-nucleotide exchange factor activity; GO:0005488 binding; GO:0005515 protein binding; GO:0017076 purine nucleotide binding; GO:0019899 enzyme binding; GO:0030234 enzyme regulator activity; GO:0030554 adenyl nucleotide binding; GO:0031625 ubiquitin protein ligase binding; GO:0036094 small molecule binding; GO:0044389 ubiquitin-like protein ligase bin…	PF00240	PF00240 Ubiquitin family
CGIg28129	Q3KQ77 EFCB1_XENLA EF-hand calcium-binding domain-containing protein 1 OS=Xenopus laevis OX=8355 GN=efcab1 PE=2 SV=1	efcab1	0.4972	0.000166391	0.518057	0.000182391	1.33649	0.0019838	0.779613	0.00279751	Up	26.5624	18.5	4	4	12639.2	13212.8	13349	28697.8	25801.6	24344	18574.9	16366.6	17450.3	13721.6	13767.4	13356.4	0.515326	0.538711	0.544265	1.17007	1.05198	0.992554	0.757338	0.667301	0.711485	0.559459	0.561326	0.544566	cytoplasm				GO:0006935 chemotaxis; GO:0009605 response to external stimulus; GO:0009987 cellular process; GO:0016477 cell migration; GO:0032780 negative regulation of ATP-dependent activity; GO:0032879 regulation of localization; GO:0040011 locomotion; GO:0040012 regulation of locomotion; GO:0042221 response to chemical; GO:0042330 taxis; GO:0043086 negative regulation of catalytic activity; GO:0043462 regul…	GO:0005622 intracellular anatomical structure; GO:0005737 cytoplasm; GO:0005856 cytoskeleton; GO:0005929 cilium; GO:0005930 axoneme; GO:0031514 motile cilium; GO:0032838 plasma membrane bounded cell projection cytoplasm; GO:0042995 cell projection; GO:0043226 organelle; GO:0043228 non-membrane-bounded organelle; GO:0043229 intracellular organelle; GO:0043232 intracellular non-membrane-bounded org…	GO:0005488 binding; GO:0005509 calcium ion binding; GO:0005515 protein binding; GO:0008092 cytoskeletal protein binding; GO:0015631 tubulin binding; GO:0043167 ion binding; GO:0043169 cation binding; GO:0045504 dynein heavy chain binding; GO:0046872 metal ion binding; GO:0048306 calcium-dependent protein binding; GO:0048487 beta-tubulin binding; GO:0120152 calcium-dependent outer dynein arm bindi…	PF13202; PF13499	PF13202 EF hand; PF13499 EF-hand domain pair	T
CGIg28141	Q11118 WOS2_SCHPO Protein wos2 OS=Schizosaccharomyces pombe (strain 972 / ATCC 24843) OX=284812 GN=wos2 PE=2 SV=1	wos2	0.570019	0.000158755	0.536651	5.97068e-05	1.25877	0.0146525	0.747924	0.00506046	Up	24.3757	5.2	1	1	135582	137645	121145	233198	230516	228144	171978	152893	171551	117779	132196	121311	0.68808	0.698548	0.614814	1.18348	1.16987	1.15783	0.872792	0.775932	0.870626	0.597728	0.670898	0.615655	cytoplasm	K15730	PTGES3; cytosolic prostaglandin-E synthase [EC:5.3.99.3]	map00590 Arachidonic acid metabolism; map01100 Metabolic pathways	GO:0000271 polysaccharide biosynthetic process; GO:0000723 telomere maintenance; GO:0001516 prostaglandin biosynthetic process; GO:0001676 long-chain fatty acid metabolic process; GO:0003008 system process; GO:0005975 carbohydrate metabolic process; GO:0005976 polysaccharide metabolic process; GO:0005977 glycogen metabolic process; GO:0005978 glycogen biosynthetic process; GO:0006082 organic acid…	GO:0000781 chromosome, telomeric region; GO:0005622 intracellular anatomical structure; GO:0005634 nucleus; GO:0005654 nucleoplasm; GO:0005694 chromosome; GO:0005697 telomerase holoenzyme complex; GO:0005737 cytoplasm; GO:0005829 cytosol; GO:0005856 cytoskeleton; GO:0005884 actin filament; GO:0015629 actin cytoskeleton; GO:0031974 membrane-enclosed lumen; GO:0031981 nuclear lumen; GO:0032991 prot…	GO:0002039 p53 binding; GO:0003720 telomerase activity; GO:0003824 catalytic activity; GO:0003964 RNA-directed DNA polymerase activity; GO:0005488 binding; GO:0005515 protein binding; GO:0016740 transferase activity; GO:0016772 transferase activity, transferring phosphorus-containing groups; GO:0016779 nucleotidyltransferase activity; GO:0016853 isomerase activity; GO:0016860 intramolecular oxido…	PF04969	PF04969 CS domain	O
CGIg04089	XP_034335338.1 uncharacterized protein LOC105324692 isoform X2 [Crassostrea gigas]	--	0.522932	0.000158431	0.925501	0.20905	1.25558	0.000507037	1.40958	0.000329904	Up	16.021	28.9	4	1	29748.7	31110.4	29664.2	62426	57061.3	53620	38870.9	36794.5	37993.5	55088.5	50765.7	54356.7	0.643774	0.673243	0.641947	1.35093	1.23483	1.16036	0.841183	0.796249	0.822195	1.19214	1.09859	1.1763	extracellular
CGIg12058	Q5R5K4 SNP29_PONAB Synaptosomal-associated protein 29 OS=Pongo abelii OX=9601 GN=SNAP29 PE=2 SV=1	SNAP29	0.658066	0.000158344	0.662154	0.000259972	1.43221	0.000668257	0.702561	0.000953594	Up	27.3594	13.9	3	3	22767	22223.4	21346.1	33128.1	32509.8	35167.3	30169	33660.5	31178	22547.7	22985.1	21215.8	0.713376	0.696345	0.668854	1.03803	1.01866	1.10192	0.94531	1.05471	0.976926	0.706504	0.720211	0.664772	cytoplasm	K08509	SNAP29; synaptosomal-associated protein 29	map04130 SNARE interactions in vesicular transport; map04140 Autophagy - animal	GO:0000003 reproduction; GO:0001775 cell activation; GO:0002252 immune effector process; GO:0002263 cell activation involved in immune response; GO:0002274 myeloid leukocyte activation; GO:0002275 myeloid cell activation involved in immune response; GO:0002283 neutrophil activation involved in immune response; GO:0002366 leukocyte activation involved in immune response; GO:0002376 immune system p…	GO:0000139 Golgi membrane; GO:0000323 lytic vacuole; GO:0005622 intracellular anatomical structure; GO:0005634 nucleus; GO:0005654 nucleoplasm; GO:0005737 cytoplasm; GO:0005764 lysosome; GO:0005765 lysosomal membrane; GO:0005766 primary lysosome; GO:0005768 endosome; GO:0005773 vacuole; GO:0005774 vacuolar membrane; GO:0005776 autophagosome; GO:0005794 Golgi apparatus; GO:0005813 centrosome; GO:0…	GO:0000149 SNARE binding; GO:0005484 SNAP receptor activity; GO:0005488 binding; GO:0005515 protein binding; GO:0019905 syntaxin binding;			U
CGIg10386	XP_011448693.2 uncharacterized protein LOC105343149 [Crassostrea gigas]	--	0.623676	0.000158173	1.28879	0.00274074	1.50285	0.00151181	1.37501	0.00444077	Up	23.5117	4.7	1	1	31641	32107.7	30955.4	47434.8	52676.4	51737	51794.3	43362.3	47169.7	63513.9	67966.7	64220	0.440735	0.447235	0.431184	0.660729	0.733741	0.720655	0.721454	0.604003	0.657037	0.884699	0.946723	0.894534	extracellular							PF02221	PF02221 ML domain
CGIg17827	XP_011432320.1 testis-expressed protein 43 [Crassostrea gigas]	--	0.308974	0.000144299	0.490792	0.000295668	2.32597	0.000355244	0.682922	0.00146463	Up	16.5887	26.1	4	4	7618.71	9817.44	8463.84	28775.8	25824.5	29225.5	20764.4	19784	19694.2	12694.9	13560	14886	0.273418	0.352325	0.303748	1.0327	0.926781	1.04883	0.745185	0.710002	0.706778	0.455592	0.486637	0.534226	cytoplasm
CGIg13608	XP_034317445.1 uncharacterized protein LOC105340770 isoform X2 [Crassostrea gigas]	--	0.25225	0.00014423	0.0420491	0	0	0	0	0	Up	36.4002	2.9	1	1	3788.66	3229.85	2972.63	12899.1	11842.4	14866.5					555.162		0.582698	0.496753	0.457193	1.98389	1.82137	2.28648					0.0853843		extracellular
CGIg22700	Q9DG68 RLA0_LITSY 60S acidic ribosomal protein P0 OS=Lithobates sylvaticus OX=45438 GN=RPLP0 PE=2 SV=1	RPLP0	0.653879	0.000141238	0.622188	0.000962303	1.31944	0.000255645	0.721164	0.00301867	Up	34.0816	23.6	6	6	764120	794529	807973	1.21884e+06	1.25055e+06	1.14996e+06	1.06073e+06	1.00922e+06	1.05267e+06	762033	806782	683106	0.775231	0.806082	0.819722	1.23657	1.26874	1.16668	1.07616	1.0239	1.06797	0.773113	0.818513	0.693039	cytoplasm	K02941	RP-LP0, RPLP0; large subunit ribosomal protein LP0	map03010 Ribosome	GO:0000184 nuclear-transcribed mRNA catabolic process, nonsense-mediated decay; GO:0000956 nuclear-transcribed mRNA catabolic process; GO:0002181 cytoplasmic translation; GO:0006139 nucleobase-containing compound metabolic process; GO:0006259 DNA metabolic process; GO:0006401 RNA catabolic process; GO:0006402 mRNA catabolic process; GO:0006412 translation; GO:0006413 translational initiation; GO:…	GO:0005622 intracellular anatomical structure; GO:0005634 nucleus; GO:0005737 cytoplasm; GO:0005783 endoplasmic reticulum; GO:0005829 cytosol; GO:0005840 ribosome; GO:0012505 endomembrane system; GO:0015934 large ribosomal subunit; GO:0016020 membrane; GO:0022625 cytosolic large ribosomal subunit; GO:0022626 cytosolic ribosome; GO:0030425 dendrite; GO:0032991 protein-containing complex; GO:003577…	GO:0003735 structural constituent of ribosome; GO:0003824 catalytic activity; GO:0003906 DNA-(apurinic or apyrimidinic site) endonuclease activity; GO:0004518 nuclease activity; GO:0004519 endonuclease activity; GO:0004520 DNA endonuclease activity; GO:0004536 DNA nuclease activity; GO:0005198 structural molecule activity; GO:0005488 binding; GO:0016787 hydrolase activity; GO:0016788 hydrolase ac…	PF17777	PF17777 Insertion domain in 60S ribosomal protein L10P	J
CGIg11662	XP_011424853.2 uncharacterized protein LOC105326484 [Crassostrea gigas]	--	0.0955936	0.000135634	0.478397	0.000386303	4.72169	0.000326721	1.05989	0.351837	Up	27.0346	19.9	5	5	2601.03		2908.16	30912.7	30279.3	25255.1	13106.7	11730.7	14181.7	13998.9	14054.8	13302.3	0.127988		0.143101	1.52111	1.48994	1.24271	0.644937	0.577225	0.69783	0.688837	0.69159	0.654561	extracellular
CGIg12728	XP_034308095.1 tripartite motif-containing protein 72-like [Crassostrea gigas]	--	0.607649	0.000134585	1.09445	0.0598972	1.77533	7.15692e-05	1.01453	0.710272	Up	63.277	2.2	1	1	17592.5	19658.9	19004.5	31535.4	30545.7	30498.5	33351.1	32764.5	33757.1	32161.4	35901	33261.7	0.604119	0.675078	0.652605	1.08291	1.04893	1.0473	1.14526	1.12512	1.1592	1.10441	1.23282	1.14219	cytoplasm	K11997	TRIM2_3; tripartite motif-containing protein 2/3					PF00643	PF00643 B-box zinc finger	O
CGIg10929	Q6INE8 VMP1_XENLA Vacuole membrane protein 1 OS=Xenopus laevis OX=8355 GN=vmp1 PE=2 SV=1	vmp1	0.42953	0.000132621	0.491768	0.00546113	1.13304	0	1.01046	0	Up	46.117	2.2	1	1	1240.78	1207.66	1165.8	3077.66	2796.01	2540.72			1365.02	1504		1254.61	0.595947	0.580039	0.559934	1.4782	1.34293	1.22031			0.655623	0.722374		0.602591	plasma membrane	K21248	VMP1; vacuole membrane protein 1	map04140 Autophagy - animal	GO:0002790 peptide secretion; GO:0006810 transport; GO:0006887 exocytosis; GO:0006914 autophagy; GO:0006996 organelle organization; GO:0007029 endoplasmic reticulum organization; GO:0007030 Golgi organization; GO:0007155 cell adhesion; GO:0008104 protein localization; GO:0008152 metabolic process; GO:0009056 catabolic process; GO:0009306 protein secretion; GO:0009892 negative regulation of metabo…	GO:0000407 phagophore assembly site; GO:0005622 intracellular anatomical structure; GO:0005737 cytoplasm; GO:0005783 endoplasmic reticulum; GO:0012505 endomembrane system; GO:0016020 membrane; GO:0043226 organelle; GO:0043227 membrane-bounded organelle; GO:0043229 intracellular organelle; GO:0043231 intracellular membrane-bounded organelle;				R
CGIg16147	Q5ZIJ9 MIB2_CHICK E3 ubiquitin-protein ligase MIB2 OS=Gallus gallus OX=9031 GN=MIB2 PE=2 SV=1	MIB2	0.632143	0.00012939	1.12104	0.00191978	1.55604	0.00051783	1.13969	0.017129	Up	110.516	19	16	16	83617.8	80283.1	75941	125270	124006	130135	125734	116771	130698	142046	143043	140246	0.561032	0.538658	0.509525	0.840498	0.832016	0.873136	0.843613	0.783474	0.876918	0.953054	0.959748	0.94098	cytoplasm	K10645	MIB; E3 ubiquitin-protein ligase mind-bomb [EC:2.3.2.27]		GO:0000209 protein polyubiquitination; GO:0000768 syncytium formation by plasma membrane fusion; GO:0006807 nitrogen compound metabolic process; GO:0006949 syncytium formation; GO:0007520 myoblast fusion; GO:0008152 metabolic process; GO:0009653 anatomical structure morphogenesis; GO:0009987 cellular process; GO:0014902 myotube differentiation; GO:0016567 protein ubiquitination; GO:0019538 protei…	GO:0000151 ubiquitin ligase complex; GO:0005622 intracellular anatomical structure; GO:0005737 cytoplasm; GO:0005768 endosome; GO:0005769 early endosome; GO:0005829 cytosol; GO:0012505 endomembrane system; GO:0030016 myofibril; GO:0030017 sarcomere; GO:0030018 Z disc; GO:0031410 cytoplasmic vesicle; GO:0031430 M band; GO:0031672 A band; GO:0031674 I band; GO:0031982 vesicle; GO:0032991 protein-co…	GO:0003824 catalytic activity; GO:0004842 ubiquitin-protein transferase activity; GO:0005488 binding; GO:0005515 protein binding; GO:0008092 cytoskeletal protein binding; GO:0008270 zinc ion binding; GO:0016740 transferase activity; GO:0017022 myosin binding; GO:0019787 ubiquitin-like protein transferase activity; GO:0032027 myosin light chain binding; GO:0032033 myosin II light chain binding; GO…	PF06701; PF00569; PF18346	PF06701 Mib_herc2; PF00569 Zinc finger, ZZ type; PF18346 Mind bomb SH3 repeat domain	R
CGIg28246	Q64459 CP3AB_MOUSE Cytochrome P450 3A11 OS=Mus musculus OX=10090 GN=Cyp3a11 PE=1 SV=1	Cyp3a11	0.611857	0.000128525	0.65168	0.000148362	1.09111	0.0446433	0.976148	0.410862	Up	58.5356	11.5	5	2	34528	31863.8	31677.9	53786.6	54976.1	51519.5	35104.5	35359.9	36540.4	34993.3	36147.6	33311.7	1.13457	1.04702	1.04092	1.76739	1.80648	1.6929	1.15351	1.1619	1.2007	1.14986	1.18779	1.0946	endoplasmic reticulum	K07424	CYP3A; cytochrome P450 family 3 subfamily A [EC:1.14.14.1]	map00140 Steroid hormone biosynthesis; map00591 Linoleic acid metabolism; map00830 Retinol metabolism; map01100 Metabolic pathways	GO:0001676 long-chain fatty acid metabolic process; GO:0002933 lipid hydroxylation; GO:0006066 alcohol metabolic process; GO:0006082 organic acid metabolic process; GO:0006629 lipid metabolic process; GO:0006631 fatty acid metabolic process; GO:0006633 fatty acid biosynthetic process; GO:0006694 steroid biosynthetic process; GO:0006706 steroid catabolic process; GO:0006720 isoprenoid metabolic pr…	GO:0005622 intracellular anatomical structure; GO:0005737 cytoplasm; GO:0005783 endoplasmic reticulum; GO:0005789 endoplasmic reticulum membrane; GO:0012505 endomembrane system; GO:0016020 membrane; GO:0031090 organelle membrane; GO:0031984 organelle subcompartment; GO:0042175 nuclear outer membrane-endoplasmic reticulum membrane network; GO:0043226 organelle; GO:0043227 membrane-bounded organell…	GO:0003824 catalytic activity; GO:0004497 monooxygenase activity; GO:0005488 binding; GO:0005496 steroid binding; GO:0005506 iron ion binding; GO:0005515 protein binding; GO:0008289 lipid binding; GO:0008390 testosterone 16-alpha-hydroxylase activity; GO:0008395 steroid hydroxylase activity; GO:0016491 oxidoreductase activity; GO:0016705 oxidoreductase activity, acting on paired donors, with inco…	PF00067	PF00067 Cytochrome P450	Q
CGIg13176	Q5R8H3 BAP31_PONAB B-cell receptor-associated protein 31 OS=Pongo abelii OX=9601 GN=BCAP31 PE=2 SV=3	BCAP31	0.428732	0.000128041	0.505945	6.11859e-05	1.85529	0.000199113	0.636072	2.03533e-05	Up	27.4377	26.2	6	6	49117.4	42903.1	42696.7	103533	98934.1	111755	84934.6	83566.3	81438.1	51401.6	53710.5	53867.2	0.501571	0.438113	0.436005	1.05725	1.01028	1.14121	0.867325	0.853353	0.83162	0.524897	0.548474	0.550075	endoplasmic reticulum	K14009	BCAP31, BAP31; B-cell receptor-associated protein 31	map04141 Protein processing in endoplasmic reticulum	GO:0000003 reproduction; GO:0002376 immune system process; GO:0002474 antigen processing and presentation of peptide antigen via MHC class I; GO:0006810 transport; GO:0006873 intracellular monoatomic ion homeostasis; GO:0006874 intracellular calcium ion homeostasis; GO:0006888 endoplasmic reticulum to Golgi vesicle-mediated transport; GO:0007154 cell communication; GO:0007165 signal transduction;…	GO:0000139 Golgi membrane; GO:0005622 intracellular anatomical structure; GO:0005737 cytoplasm; GO:0005783 endoplasmic reticulum; GO:0005789 endoplasmic reticulum membrane; GO:0005794 Golgi apparatus; GO:0005795 Golgi stack; GO:0005811 lipid droplet; GO:0005829 cytosol; GO:0005886 plasma membrane; GO:0012505 endomembrane system; GO:0016020 membrane; GO:0030135 coated vesicle; GO:0030136 clathrin-…	GO:0005102 signaling receptor binding; GO:0005488 binding; GO:0005515 protein binding; GO:0042287 MHC protein binding; GO:0042288 MHC class I protein binding; GO:0044877 protein-containing complex binding;			V
CGIg13694	Q28HX4 IFT57_XENTR Intraflagellar transport protein 57 homolog OS=Xenopus tropicalis OX=8364 GN=ift57 PE=2 SV=1	ift57	0.5721	0.00012635	0.82646	0.00852947	1.60165	0.000510089	0.90195	0.0943769	Up	53.1839	10	5	5	9307.87	8921.24	8405.18	15633.4	14825.6	16096.4	14244.7	15068.8	13345.2	12513.1	13637.3	12325.7	0.590387	0.565864	0.533131	0.991607	0.940369	1.02097	0.903526	0.955799	0.846471	0.793691	0.864998	0.781804	mitochondria	K04638	IFT57, HIPPI, ESRRBL1; intraflagellar transport protein 57		GO:0001654 eye development; GO:0001754 eye photoreceptor cell differentiation; GO:0001838 embryonic epithelial tube formation; GO:0001841 neural tube formation; GO:0001843 neural tube closure; GO:0001894 tissue homeostasis; GO:0001895 retina homeostasis; GO:0001947 heart looping; GO:0002009 morphogenesis of an epithelium; GO:0003002 regionalization; GO:0003007 heart morphogenesis; GO:0003143 embr…	GO:0005622 intracellular anatomical structure; GO:0005737 cytoplasm; GO:0005794 Golgi apparatus; GO:0005813 centrosome; GO:0005815 microtubule organizing center; GO:0005856 cytoskeleton; GO:0005929 cilium; GO:0005930 axoneme; GO:0012505 endomembrane system; GO:0015630 microtubule cytoskeleton; GO:0030425 dendrite; GO:0030990 intraciliary transport particle; GO:0030992 intraciliary transport parti…				T
CGIg04807	P07607 TYSY_MOUSE Thymidylate synthase OS=Mus musculus OX=10090 GN=Tyms PE=1 SV=1	Tyms	0.606694	0.000120618	0.783486	0.00675453	1.77809	0.0107731	0.726287	0.0761973	Up	42.0169	8	2	2	6668.82	6545.96	6292.14	11304.1	10236.7	10612	8904.64	12996.4	12784	7871.56	8353.27	8966.44	0.587427	0.576605	0.554247	0.995726	0.901707	0.934768	0.784371	1.1448	1.12608	0.693372	0.735804	0.789815	cytoplasm	K00560	thyA, TYMS; thymidylate synthase [EC:2.1.1.45]	map00240 Pyrimidine metabolism; map00670 One carbon pool by folate; map01100 Metabolic pathways	GO:0000082 G1/S transition of mitotic cell cycle; GO:0000278 mitotic cell cycle; GO:0001101 response to acid chemical; GO:0001501 skeletal system development; GO:0001889 liver development; GO:0002064 epithelial cell development; GO:0002065 columnar/cuboidal epithelial cell differentiation; GO:0002066 columnar/cuboidal epithelial cell development; GO:0002069 columnar/cuboidal epithelial cell matur…	GO:0005622 intracellular anatomical structure; GO:0005634 nucleus; GO:0005730 nucleolus; GO:0005737 cytoplasm; GO:0005739 mitochondrion; GO:0005740 mitochondrial envelope; GO:0005743 mitochondrial inner membrane; GO:0005759 mitochondrial matrix; GO:0005829 cytosol; GO:0016020 membrane; GO:0019866 organelle inner membrane; GO:0031090 organelle membrane; GO:0031966 mitochondrial membrane; GO:003196…	GO:0000166 nucleotide binding; GO:0000900 mRNA regulatory element binding translation repressor activity; GO:0003676 nucleic acid binding; GO:0003723 RNA binding; GO:0003729 mRNA binding; GO:0003824 catalytic activity; GO:0004799 thymidylate synthase activity; GO:0005488 binding; GO:0005515 protein binding; GO:0005542 folic acid binding; GO:0008168 methyltransferase activity; GO:0016740 transfera…	PF00303	PF00303 Thymidylate synthase	F
CGIg18806	P30533 AMRP_HUMAN Alpha-2-macroglobulin receptor-associated protein OS=Homo sapiens OX=9606 GN=LRPAP1 PE=1 SV=1	LRPAP1	0.139859	0.000117503	0.747022	0.00832077	3.76449	0.00138789	1.41885	0.0378375	Up	39.2508	8.6	3	3	1232.91	820.851	1064.45	6595.13	7751.16	7949.11	4399.03	4291.57	3047.87	5503.56	5668.26	5483.34	0.241771	0.160966	0.208734	1.29328	1.51998	1.55879	0.862637	0.841564	0.597678	1.07923	1.11153	1.07527	cytoplasm	K22290	LRPAP1; alpha-2-macroglobulin receptor-associated protein	map04979 Cholesterol metabolism	GO:0002090 regulation of receptor internalization; GO:0002091 negative regulation of receptor internalization; GO:0006810 transport; GO:0009892 negative regulation of metabolic process; GO:0009966 regulation of signal transduction; GO:0009968 negative regulation of signal transduction; GO:0010469 regulation of signaling receptor activity; GO:0010605 negative regulation of macromolecule metabolic …	GO:0005576 extracellular region; GO:0005622 intracellular anatomical structure; GO:0005737 cytoplasm; GO:0005768 endosome; GO:0005783 endoplasmic reticulum; GO:0005788 endoplasmic reticulum lumen; GO:0005791 rough endoplasmic reticulum; GO:0005793 endoplasmic reticulum-Golgi intermediate compartment; GO:0005794 Golgi apparatus; GO:0005801 cis-Golgi network; GO:0005886 plasma membrane; GO:0012505 …	GO:0001540 amyloid-beta binding; GO:0005102 signaling receptor binding; GO:0005488 binding; GO:0005515 protein binding; GO:0019899 enzyme binding; GO:0030545 signaling receptor regulator activity; GO:0030547 signaling receptor inhibitor activity; GO:0033218 amide binding; GO:0035473 lipase binding; GO:0042277 peptide binding; GO:0048019 receptor antagonist activity; GO:0050750 low-density lipopro…	PF06400; PF06401	PF06400 Alpha-2-macroglobulin RAP, N-terminal domain; PF06401 Alpha-2-macroglobulin RAP, C-terminal domain	OUTIV
CGIg18656	P20072 ANXA7_BOVIN Annexin A7 OS=Bos taurus OX=9913 GN=ANXA7 PE=1 SV=2	ANXA7	0.316992	0.000114331	0.558038	0.000217494	1.98816	0.000726267	0.885448	0.0401606	Up	35.1253	12.5	4	4	31708.7	26891.3	34078.2	100032	100844	91491.7	58672.3	62145.6	63441.3	56421.5	50818.3	55912.3	0.33719	0.285961	0.362387	1.06374	1.07237	0.972921	0.62392	0.660855	0.674634	0.599985	0.540401	0.59457	cytoplasm	K17094	ANXA6; annexin A6				GO:0001786 phosphatidylserine binding; GO:0005488 binding; GO:0005515 protein binding; GO:0005539 glycosaminoglycan binding; GO:0005543 phospholipid binding; GO:0005545 1-phosphatidylinositol binding; GO:0008201 heparin binding; GO:0008289 lipid binding; GO:0008429 phosphatidylethanolamine binding; GO:0035091 phosphatidylinositol binding; GO:0043167 ion binding; GO:0043168 anion binding; GO:00433…	PF00191	PF00191 Annexin	U
CGIg22705	XP_011425482.2 buccalin-like [Crassostrea gigas]	--	0.656977	0.000112897	0.977824	0.665946	1.58068	0.00122565	0.941602	0.447783	Up	31.6394	4	1	1	9531.96	9732.46	10032.2	15489.1	14276.2	14827.7	16850.1	15467.8	13990.5	13956.5	13755.3	15892.3	0.63012	0.643374	0.663187	1.02392	0.943742	0.980201	1.11389	1.02251	0.924855	0.922609	0.909305	1.05058	extracellular
CGIg10915	P46088 GST_NOTSL Glutathione S-transferase OS=Nototodarus sloanii OX=215440 PE=1 SV=1	--	0.610822	0.000112894	0.630679	0.000142044	1.18139	0.00219957	0.873976	0.00454045	Up	23.0699	33.2	7	7	695492	651281	657434	1.1465e+06	1.05108e+06	1.08358e+06	781913	777364	808477	713965	666076	689319	1.12536	1.05382	1.06378	1.85512	1.70072	1.75332	1.26519	1.25783	1.30818	1.15525	1.07776	1.11537	cytoplasm	K00799	GST, gst; glutathione S-transferase [EC:2.5.1.18]	map00480 Glutathione metabolism; map00980 Metabolism of xenobiotics by cytochrome P450; map00982 Drug metabolism - cytochrome P450; map00983 Drug metabolism - other enzymes; map01100 Metabolic pathways; map04212 Longevity regulating pathway - worm	GO:0001516 prostaglandin biosynthetic process; GO:0001676 long-chain fatty acid metabolic process; GO:0006082 organic acid metabolic process; GO:0006629 lipid metabolic process; GO:0006631 fatty acid metabolic process; GO:0006633 fatty acid biosynthetic process; GO:0006636 unsaturated fatty acid biosynthetic process; GO:0006690 icosanoid metabolic process; GO:0006692 prostanoid metabolic process;…	GO:0005622 intracellular anatomical structure; GO:0005737 cytoplasm; GO:0005829 cytosol;	GO:0000287 magnesium ion binding; GO:0003824 catalytic activity; GO:0004364 glutathione transferase activity; GO:0004667 prostaglandin-D synthase activity; GO:0005488 binding; GO:0005509 calcium ion binding; GO:0005515 protein binding; GO:0016740 transferase activity; GO:0016765 transferase activity, transferring alkyl or aryl (other than methyl) groups; GO:0016853 isomerase activity; GO:0016860 …	PF02798; PF14497	PF02798 Glutathione S-transferase, N-terminal domain; PF14497 Glutathione S-transferase, C-terminal domain	O
CGIg22157	Q6IQY5 CEP70_MOUSE Centrosomal protein of 70 kDa OS=Mus musculus OX=10090 GN=Cep70 PE=2 SV=1	Cep70	0.522547	0.000111191	0.727575	0.00651946	1.70214	0.00149639	0.818007	0.0694924	Up	74.2236	11.1	8	8	6840.03	6808.83	7581.88	13028.1	14176	13425.3	13437.9	11666.4	11033.4	10836.3	8910.22	9814.33	0.487976	0.48575	0.5409	0.929436	1.01133	0.957777	0.958678	0.832295	0.787135	0.773078	0.635665	0.700166	cytoplasm,nucleus	K16802	CEP70; centrosomal protein CEP70		GO:0000086 G2/M transition of mitotic cell cycle; GO:0000278 mitotic cell cycle; GO:0006996 organelle organization; GO:0007049 cell cycle; GO:0007346 regulation of mitotic cell cycle; GO:0009987 cellular process; GO:0010389 regulation of G2/M transition of mitotic cell cycle; GO:0010564 regulation of cell cycle process; GO:0016043 cellular component organization; GO:0022402 cell cycle process; GO…	GO:0005622 intracellular anatomical structure; GO:0005634 nucleus; GO:0005635 nuclear envelope; GO:0005654 nucleoplasm; GO:0005737 cytoplasm; GO:0005813 centrosome; GO:0005815 microtubule organizing center; GO:0005829 cytosol; GO:0005856 cytoskeleton; GO:0012505 endomembrane system; GO:0015630 microtubule cytoskeleton; GO:0016020 membrane; GO:0031090 organelle membrane; GO:0031965 nuclear membran…	GO:0005488 binding; GO:0005515 protein binding; GO:0042802 identical protein binding;
CGIg17845	Q71UH5 CALM_GLOSP Calmodulin OS=Globisporangium splendens OX=82926 PE=2 SV=1	--	0.594967	0.000107627	0.33893	3.74761e-06	0.532589	0.00377007	1.06961	0.501564	Up	16.8306	22.8	4	4	41932.4	45338.2	42603	74229.6	74774.1	69283.3	24560.2	18619.1	25989.9	25021.9	25192.6	23769.5	0.913154	0.987322	0.927758	1.61649	1.62834	1.50877	0.534844	0.405465	0.565978	0.544898	0.548615	0.517624	cytoplasm	K02183	CALM; calmodulin	map04014 Ras signaling pathway; map04015 Rap1 signaling pathway; map04020 Calcium signaling pathway; map04022 cGMP-PKG signaling pathway; map04024 cAMP signaling pathway; map04070 Phosphatidylinositol signaling system; map04114 Oocyte meiosis; map04218 Cellular senescence; map04261 Adrenergic signaling in cardiomyocytes; map04270 Vascular smooth muscle contraction; map04371 Apelin signaling pathw…				PF13499	PF13499 EF-hand domain pair	T
CGIg18935	O94581 COX12_SCHPO Cytochrome c oxidase subunit 12, mitochondrial OS=Schizosaccharomyces pombe (strain 972 / ATCC 24843) OX=284812 GN=cox12 PE=3 SV=2	cox12	0.44059	0.000106935	0.544617	0.000984283	1.97523	0.000131486	0.625806	0.00198679	Up	11.6742	8.2	1	1	72232.7	70991.2	80178.3	156577	176748	173728	150285	139124	151862	90982.6	102072	83095.2	0.409783	0.40274	0.454859	0.888278	1.00271	0.985573	0.85258	0.78926	0.861529	0.516152	0.579064	0.471406	extracellular	K02267	COX6B; cytochrome c oxidase subunit 6b	map00190 Oxidative phosphorylation; map01100 Metabolic pathways; map04260 Cardiac muscle contraction; map04714 Thermogenesis	GO:0006091 generation of precursor metabolites and energy; GO:0006810 transport; GO:0006811 monoatomic ion transport; GO:0006812 monoatomic cation transport; GO:0006996 organelle organization; GO:0007005 mitochondrion organization; GO:0008152 metabolic process; GO:0008535 respiratory chain complex IV assembly; GO:0009987 cellular process; GO:0016043 cellular component organization; GO:0017004 cyt…	GO:0005622 intracellular anatomical structure; GO:0005737 cytoplasm; GO:0005739 mitochondrion; GO:0005740 mitochondrial envelope; GO:0005743 mitochondrial inner membrane; GO:0005746 mitochondrial respirasome; GO:0005751 mitochondrial respiratory chain complex IV; GO:0005758 mitochondrial intermembrane space; GO:0016020 membrane; GO:0019866 organelle inner membrane; GO:0030061 mitochondrial crista…	GO:0003824 catalytic activity; GO:0004129 cytochrome-c oxidase activity; GO:0005215 transporter activity; GO:0008324 monoatomic cation transmembrane transporter activity; GO:0009055 electron transfer activity; GO:0015075 monoatomic ion transmembrane transporter activity; GO:0015078 proton transmembrane transporter activity; GO:0015318 inorganic molecular entity transmembrane transporter activity;…	PF02297	PF02297 Cytochrome oxidase c subunit VIb	C
CGIg23155	P43147 EMPA_VIBAN Virulence metalloprotease OS=Vibrio anguillarum OX=55601 GN=empA PE=1 SV=1	empA	0.380863	0.000101898	0.374913	0.000494645	1.70028	0.000328927	0.578951	0.00297313	Up	70.9581	1.6	1	1	5434.27	5044.25	4632.95	13749.6	12136.6	13790.8	8624.07	8600.17	8469.46	5803.37	4720.68	4351.34	0.703997	0.653472	0.600188	1.78122	1.57227	1.78657	1.11723	1.11413	1.0972	0.751814	0.611553	0.563707	cytoplasm				GO:0006508 proteolysis; GO:0006807 nitrogen compound metabolic process; GO:0008152 metabolic process; GO:0019538 protein metabolic process; GO:0043170 macromolecule metabolic process; GO:0044238 primary metabolic process; GO:0044419 biological process involved in interspecies interaction between organisms; GO:0071704 organic substance metabolic process; GO:1901564 organonitrogen compound metaboli…	GO:0005576 extracellular region;		PF01447; PF02868	PF01447 Thermolysin metallopeptidase, catalytic domain; PF02868 Thermolysin metallopeptidase, alpha-helical domain
CGIg03484	Q5UR67 RIBX_MIMIV N-glycosidase R617 OS=Acanthamoeba polyphaga mimivirus OX=212035 GN=MIMI_R617 PE=3 SV=1	MIMI_R617	0.459639	9.62169e-05	1.02473	0.57068	1.3831	0.00489093	1.6119	0.000648412	Up	56.1838	13.5	7	7	6725.07	7220.8	6324.1	15180.4	15127.9	13791.4	8656.39	10043.6	9335.5	14656.1	15825.4	14708.9	0.517795	0.555964	0.486923	1.16881	1.16477	1.06186	0.666497	0.773303	0.718785	1.12844	1.21847	1.13251	endoplasmic reticulum	K08857	NEK1_4_5; serine/threonine-protein kinase Nek1/4/5 [EC:2.7.11.1]					PF08719	PF08719 NADAR domain
CGIg13200	XP_034307460.1 complement C1q tumor necrosis factor-related protein 3-like [Crassostrea gigas]	--	0.503546	9.15047e-05	1.43869	0.00358283	0.767511	0.076909	3.72259	0.000418142	Up	21.5415	5.6	1	1	6724.63	6872.62	6052.16	13477.4	12831.2	12713.5	5614.19	3998.3	5468.64	20105.6	19315.9	16719.4	0.834872	0.853246	0.751384	1.67324	1.59301	1.5784	0.69701	0.496395	0.678939	2.49614	2.3981	2.07573	extracellular	K24236	C1QTNF3; complement C1q and tumor necrosis factor-related protein 3					PF00386	PF00386 C1q domain
CGIg26004	Q91YW3 DNJC3_MOUSE DnaJ homolog subfamily C member 3 OS=Mus musculus OX=10090 GN=Dnajc3 PE=1 SV=1	Dnajc3	0.639518	8.79983e-05	0.954494	0.0227211	1.50879	0.000204275	0.989213	0.620615	Up	56.95	26.3	11	11	26801.2	27325.4	24989.5	41414	41578.5	40719.5	40297.9	40575.1	38497	38481.6	39857.5	39743.3	0.716079	0.730086	0.667673	1.10651	1.1109	1.08795	1.07669	1.08409	1.02857	1.02816	1.06492	1.06187	endoplasmic reticulum	K09523	DNAJC3; DnaJ homolog subfamily C member 3	map04141 Protein processing in endoplasmic reticulum	GO:0001775 cell activation; GO:0001932 regulation of protein phosphorylation; GO:0001933 negative regulation of protein phosphorylation; GO:0002252 immune effector process; GO:0002263 cell activation involved in immune response; GO:0002274 myeloid leukocyte activation; GO:0002275 myeloid cell activation involved in immune response; GO:0002283 neutrophil activation involved in immune response; GO:…	GO:0000323 lytic vacuole; GO:0005576 extracellular region; GO:0005622 intracellular anatomical structure; GO:0005737 cytoplasm; GO:0005764 lysosome; GO:0005766 primary lysosome; GO:0005773 vacuole; GO:0005775 vacuolar lumen; GO:0005783 endoplasmic reticulum; GO:0005788 endoplasmic reticulum lumen; GO:0005790 smooth endoplasmic reticulum; GO:0005829 cytosol; GO:0012505 endomembrane system; GO:0030…	GO:0004857 enzyme inhibitor activity; GO:0004860 protein kinase inhibitor activity; GO:0005488 binding; GO:0005515 protein binding; GO:0019207 kinase regulator activity; GO:0019210 kinase inhibitor activity; GO:0019887 protein kinase regulator activity; GO:0019899 enzyme binding; GO:0019900 kinase binding; GO:0019901 protein kinase binding; GO:0030234 enzyme regulator activity; GO:0051087 protein…	PF14559; PF00226	PF14559 Tetratricopeptide repeat; PF00226 DnaJ domain	V
CGIg11461	P42577 FRIS_LYMST Soma ferritin OS=Lymnaea stagnalis OX=6523 PE=2 SV=2	--	0.631103	8.79344e-05	0.579102	3.97414e-05	1.11543	0.119639	0.822644	0.0231261	Up	19.9702	31.6	4	4	91634.7	95732.5	99336.3	156218	150491	147580	112382	96412.3	111004	91574.3	85139.1	86366.6	0.673719	0.703846	0.730342	1.14855	1.10645	1.08504	0.826259	0.708844	0.816122	0.673274	0.625961	0.634986	cytoplasm,nucleus	K00522	FTH1; ferritin heavy chain [EC:1.16.3.2]	map04216 Ferroptosis; map04217 Necroptosis; map04978 Mineral absorption	GO:0000041 transition metal ion transport; GO:0001775 cell activation; GO:0002252 immune effector process; GO:0002263 cell activation involved in immune response; GO:0002274 myeloid leukocyte activation; GO:0002275 myeloid cell activation involved in immune response; GO:0002283 neutrophil activation involved in immune response; GO:0002366 leukocyte activation involved in immune response; GO:00023…	GO:0000323 lytic vacuole; GO:0005576 extracellular region; GO:0005622 intracellular anatomical structure; GO:0005737 cytoplasm; GO:0005764 lysosome; GO:0005767 secondary lysosome; GO:0005773 vacuole; GO:0005776 autophagosome; GO:0005829 cytosol; GO:0008043 intracellular ferritin complex; GO:0012505 endomembrane system; GO:0030139 endocytic vesicle; GO:0030141 secretory granule; GO:0031410 cytopla…	GO:0005488 binding; GO:0005506 iron ion binding; GO:0043167 ion binding; GO:0043169 cation binding; GO:0046872 metal ion binding; GO:0046914 transition metal ion binding;	PF00210	PF00210 Ferritin-like domain	P
CGIg21231	Q9NZJ4 SACS_HUMAN Sacsin OS=Homo sapiens OX=9606 GN=SACS PE=1 SV=2	SACS	0.579809	8.4319e-05	0.85876	0.013041	1.07677	0.0840354	1.37551	0.000762749	Up	444.529	2.5	9	9	3788.42	4074.79	3973.16	6464.32	7040.01	6909.89	4052.65	4297.02	4395.4	6130.52	5660.11	5740.31	0.74528	0.801617	0.781622	1.2717	1.38495	1.35935	0.797262	0.845335	0.864689	1.20603	1.11349	1.12927	nucleus	K17592	SACS; sacsin		GO:0006457 protein folding; GO:0009987 cellular process; GO:0044087 regulation of cellular component biogenesis; GO:0048519 negative regulation of biological process; GO:0048523 negative regulation of cellular process; GO:0050789 regulation of biological process; GO:0050794 regulation of cellular process; GO:0051128 regulation of cellular component organization; GO:0051129 negative regulation of …	GO:0005622 intracellular anatomical structure; GO:0005634 nucleus; GO:0005737 cytoplasm; GO:0005739 mitochondrion; GO:0030424 axon; GO:0030425 dendrite; GO:0036477 somatodendritic compartment; GO:0042995 cell projection; GO:0043005 neuron projection; GO:0043226 organelle; GO:0043227 membrane-bounded organelle; GO:0043229 intracellular organelle; GO:0043231 intracellular membrane-bounded organelle…	GO:0005102 signaling receptor binding; GO:0005488 binding; GO:0005515 protein binding; GO:0030544 Hsp70 protein binding; GO:0031072 heat shock protein binding; GO:0044877 protein-containing complex binding; GO:0050750 low-density lipoprotein particle receptor binding; GO:0051087 protein-folding chaperone binding; GO:0070325 lipoprotein particle receptor binding; GO:0070628 proteasome binding;
CGIg20053	Q94519 ACPM_DROME Acyl carrier protein, mitochondrial OS=Drosophila melanogaster OX=7227 GN=ND-ACP PE=2 SV=1	ND-ACP	0.661188	8.29201e-05	0.794017	0.000542944	0.612472	0.00786409	1.96074	0.0024712	Up	17.365	6.7	1	1	32869.7	33575.3	34310.9	49976.6	49371.4	53038.2	16722.7	21719.1	23268.3	40370.4	40699.1	39927.7	0.891551	0.910689	0.930642	1.35556	1.33914	1.4386	0.453582	0.589105	0.631125	1.095	1.10391	1.08299	mitochondria	K03955	NDUFAB1; NADH dehydrogenase (ubiquinone) 1 alpha/beta subcomplex 1, acyl-carrier protein	map00190 Oxidative phosphorylation; map01100 Metabolic pathways; map04714 Thermogenesis; map04723 Retrograde endocannabinoid signaling	GO:0005975 carbohydrate metabolic process; GO:0006082 organic acid metabolic process; GO:0006091 generation of precursor metabolites and energy; GO:0006119 oxidative phosphorylation; GO:0006120 mitochondrial electron transport, NADH to ubiquinone; GO:0006139 nucleobase-containing compound metabolic process; GO:0006163 purine nucleotide metabolic process; GO:0006629 lipid metabolic process; GO:000…	GO:0005622 intracellular anatomical structure; GO:0005634 nucleus; GO:0005654 nucleoplasm; GO:0005737 cytoplasm; GO:0005739 mitochondrion; GO:0005740 mitochondrial envelope; GO:0005743 mitochondrial inner membrane; GO:0005746 mitochondrial respirasome; GO:0005747 mitochondrial respiratory chain complex I; GO:0005759 mitochondrial matrix; GO:0005829 cytosol; GO:0016020 membrane; GO:0019866 organel…	GO:0000035 acyl binding; GO:0000036 acyl carrier activity; GO:0003824 catalytic activity; GO:0003954 NADH dehydrogenase activity; GO:0005488 binding; GO:0005504 fatty acid binding; GO:0005509 calcium ion binding; GO:0008137 NADH dehydrogenase (ubiquinone) activity; GO:0008289 lipid binding; GO:0016491 oxidoreductase activity; GO:0016651 oxidoreductase activity, acting on NAD(P)H; GO:0016655 oxido…	PF00550	PF00550 Phosphopantetheine attachment site	CIQ
CGIg15108	P27473 IFI44_PANTR Interferon-induced protein 44 OS=Pan troglodytes OX=9598 GN=IFI44 PE=1 SV=1	IFI44	0.427757	8.15467e-05	0.976976	0.726051	1.12984	0.0369764	2.02148	0.000286736	Up	53.15	6.4	3	1	10868.8	10011.5	9528.09	22071.9	24558.3	24457.8	11644	11512.3	11200.2	23671.6	25117.6	20662.1	0.649305	0.598088	0.569209	1.31858	1.46712	1.46111	0.695616	0.687748	0.669104	1.41414	1.50053	1.23436	cytoplasm				GO:0002252 immune effector process; GO:0002376 immune system process; GO:0006950 response to stress; GO:0006952 defense response; GO:0006955 immune response; GO:0009605 response to external stimulus; GO:0009607 response to biotic stimulus; GO:0009615 response to virus; GO:0009617 response to bacterium; GO:0043207 response to external biotic stimulus; GO:0050896 response to stimulus; GO:0051607 de…			PF07534	PF07534 TLD
CGIg27907	XP_034310167.1 uncharacterized protein LOC105339995 [Crassostrea gigas]	--	0.653619	7.99253e-05	0.77247	0.00201657	0.830624	0.0243272	1.42283	0.00386438	Up	63.8787	18.8	10	9	38100.2	37839.6	39803.2	60951	56822.7	59306.6	34161.1	33053.9	28923.9	43783.5	48295.4	44710.4	0.611818	0.607633	0.639165	0.978759	0.912466	0.952353	0.548564	0.530783	0.464463	0.703081	0.775533	0.717964	nucleus
CGIg20413	A6QLG5 RS9_BOVIN 40S ribosomal protein S9 OS=Bos taurus OX=9913 GN=RPS9 PE=2 SV=1	RPS9	0.557537	7.90142e-05	0.869145	0.10474	1.3059	0.00648582	1.19373	0.0900728	Up	65.319	8.4	6	6	300819	330872	303024	569253	539021	568232	438951	381942	399754	551426	443732	461970	0.766007	0.842532	0.77162	1.44955	1.37256	1.44695	1.11775	0.972578	1.01793	1.40415	1.12992	1.17636	cytoplasm	K02997	RP-S9e, RPS9; small subunit ribosomal protein S9e	map03010 Ribosome				PF01479	PF01479 S4 domain	J
CGIg11936	O88741 GDAP1_MOUSE Ganglioside-induced differentiation-associated protein 1 OS=Mus musculus OX=10090 GN=Gdap1 PE=1 SV=1	Gdap1	0.568218	7.82344e-05	0.468677	5.65483e-05	0.72418	2.74823e-05	1.13897	0.0111116	Up	34.9654	5.5	2	2	33190.5	32439.7	31876.7	60707.4	54434.5	56459.4	23980	23302.2	23330.3	26774.7	25551.7	28099.2	0.917582	0.896824	0.881258	1.67831	1.50489	1.56087	0.662949	0.644211	0.644987	0.74021	0.706398	0.776826	cytoplasm	K22077	GDAP1; ganglioside-induced differentiation-associated protein 1		GO:0000266 mitochondrial fission; GO:0001101 response to acid chemical; GO:0006412 translation; GO:0006414 translational elongation; GO:0006518 peptide metabolic process; GO:0006575 cellular modified amino acid metabolic process; GO:0006605 protein targeting; GO:0006626 protein targeting to mitochondrion; GO:0006749 glutathione metabolic process; GO:0006790 sulfur compound metabolic process; GO:0…	GO:0005622 intracellular anatomical structure; GO:0005634 nucleus; GO:0005737 cytoplasm; GO:0005739 mitochondrion; GO:0005740 mitochondrial envelope; GO:0005741 mitochondrial outer membrane; GO:0005829 cytosol; GO:0016020 membrane; GO:0019867 outer membrane; GO:0031090 organelle membrane; GO:0031966 mitochondrial membrane; GO:0031967 organelle envelope; GO:0031968 organelle outer membrane; GO:003…	GO:0003676 nucleic acid binding; GO:0003723 RNA binding; GO:0003746 translation elongation factor activity; GO:0003824 catalytic activity; GO:0004364 glutathione transferase activity; GO:0005488 binding; GO:0008135 translation factor activity, RNA binding; GO:0016740 transferase activity; GO:0016765 transferase activity, transferring alkyl or aryl (other than methyl) groups; GO:0097159 organic cy…	PF13417; PF00043	PF13417 Glutathione S-transferase, N-terminal domain; PF00043 Glutathione S-transferase, C-terminal domain	S
CGIg25107	VDI15484.1 Hypothetical predicted protein [Mytilus galloprovincialis]	--	0.543346	7.81262e-05	0.557727	0.000106448	0.798944	9.37216e-05	1.28478	0.000131827	Up	25.6478	32.7	6	6	82705.3	82454.6	82665.2	141458	160049	154602	67059.8	64146.3	66792.2	83660.6	84282.2	86441.4	0.473559	0.472123	0.473329	0.809968	0.916417	0.88523	0.383975	0.367292	0.382442	0.479029	0.482588	0.494951	cytoplasm
CGIg07238	P17248 SYWC_BOVIN Tryptophan--tRNA ligase, cytoplasmic OS=Bos taurus OX=9913 GN=WARS1 PE=1 SV=3	WARS1	0.461987	7.78871e-05	0.809055	0.0104637	0.490587	0.000174112	3.5697	1.72752e-05	Up	47.4702	2.2	1	1	364616	360289	377096	728538	846041	810772	166728	175727	198173	652084	627188	650608	0.685805	0.677666	0.709279	1.3703	1.59131	1.52498	0.313597	0.330525	0.372743	1.2265	1.17967	1.22373	nucleus	K01867	WARS, trpS; tryptophanyl-tRNA synthetase [EC:6.1.1.2]	map00970 Aminoacyl-tRNA biosynthesis	GO:0000902 cell morphogenesis; GO:0001932 regulation of protein phosphorylation; GO:0001933 negative regulation of protein phosphorylation; GO:0006082 organic acid metabolic process; GO:0006139 nucleobase-containing compound metabolic process; GO:0006399 tRNA metabolic process; GO:0006412 translation; GO:0006418 tRNA aminoacylation for protein translation; GO:0006436 tryptophanyl-tRNA aminoacylat…	GO:0005622 intracellular anatomical structure; GO:0005634 nucleus; GO:0005737 cytoplasm; GO:0005829 cytosol; GO:0032991 protein-containing complex; GO:0043226 organelle; GO:0043227 membrane-bounded organelle; GO:0043229 intracellular organelle; GO:0043231 intracellular membrane-bounded organelle;	GO:0003824 catalytic activity; GO:0004812 aminoacyl-tRNA ligase activity; GO:0004830 tryptophan-tRNA ligase activity; GO:0004857 enzyme inhibitor activity; GO:0005488 binding; GO:0005515 protein binding; GO:0016874 ligase activity; GO:0016875 ligase activity, forming carbon-oxygen bonds; GO:0019207 kinase regulator activity; GO:0019210 kinase inhibitor activity; GO:0019899 enzyme binding; GO:0019…			J
CGIg26247	Q6NX65 PDC10_RAT Programmed cell death protein 10 OS=Rattus norvegicus OX=10116 GN=Pdcd10 PE=2 SV=1	Pdcd10	0.56865	7.77548e-05	0.532247	0.000777424	1.03154	0.332509	0.907369	0.203662	Up	24.5534	20.1	4	4	13201.8	13276.6	13484.6	22561.5	25013.9	22701.5	14429.9	13160.1	13633.3	11056	12833.2	13515.6	0.536725	0.539765	0.54822	0.917246	1.01695	0.922937	0.586654	0.535028	0.554265	0.449483	0.521739	0.549479	cytoplasm	K18269	PDCD10; programmed cell death protein 10		GO:0000302 response to reactive oxygen species; GO:0001568 blood vessel development; GO:0001932 regulation of protein phosphorylation; GO:0001934 positive regulation of protein phosphorylation; GO:0001936 regulation of endothelial cell proliferation; GO:0001937 negative regulation of endothelial cell proliferation; GO:0001944 vasculature development; GO:0002009 morphogenesis of an epithelium; GO:…	GO:0000139 Golgi membrane; GO:0005622 intracellular anatomical structure; GO:0005737 cytoplasm; GO:0005794 Golgi apparatus; GO:0005829 cytosol; GO:0005886 plasma membrane; GO:0009898 cytoplasmic side of plasma membrane; GO:0012505 endomembrane system; GO:0016020 membrane; GO:0016324 apical plasma membrane; GO:0030427 site of polarized growth; GO:0031090 organelle membrane; GO:0031984 organelle su…	GO:0005488 binding; GO:0005515 protein binding; GO:0019899 enzyme binding; GO:0019900 kinase binding; GO:0019901 protein kinase binding; GO:0042802 identical protein binding; GO:0042803 protein homodimerization activity; GO:0046983 protein dimerization activity;			S
CGIg12503	XP_034338067.1 uncharacterized protein LOC117692862 [Crassostrea gigas]	--	0.176196	7.50498e-05	0.542382	0.000161928	0.391161	0.0672805	7.86962	0.0350807	Up	31.7893	3.7	1	1		6057.16	6653.34	36573.8	37884.1	33749.7	2827.39	2144.45		18480.6	19952.3	20256.9		0.261756	0.28752	1.58051	1.63714	1.45847	0.122184	0.0926712		0.79863	0.862227	0.875387	cytoplasm
CGIg00187	A4IJ21 MNS1_XENTR Meiosis-specific nuclear structural protein 1 OS=Xenopus tropicalis OX=8364 GN=mns1 PE=2 SV=1	mns1	0.41416	7.48335e-05	0.660237	0.00297785	1.772	0.000338193	0.899637	0.156881	Up	61.9369	16	9	2	19946.9	17539.9	16933	43048.7	42988.5	45360.7	32639.9	31778.8	32013.3	28747.4	25876.4	32129.9	0.468808	0.412238	0.397973	1.01177	1.01035	1.06611	0.767129	0.746891	0.752402	0.675645	0.608169	0.755144	nucleus	K25441	MNS1; meiosis-specific nuclear structural protein 1		GO:0000003 reproduction; GO:0003002 regionalization; GO:0006996 organelle organization; GO:0007275 multicellular organism development; GO:0007276 gamete generation; GO:0007283 spermatogenesis; GO:0007389 pattern specification process; GO:0009798 axis specification; GO:0009987 cellular process; GO:0010638 positive regulation of organelle organization; GO:0016043 cellular component organization; GO…	GO:0005622 intracellular anatomical structure; GO:0005634 nucleus; GO:0005635 nuclear envelope; GO:0005737 cytoplasm; GO:0005856 cytoskeleton; GO:0005882 intermediate filament; GO:0005929 cilium; GO:0005930 axoneme; GO:0012505 endomembrane system; GO:0031514 motile cilium; GO:0031967 organelle envelope; GO:0031975 envelope; GO:0032838 plasma membrane bounded cell projection cytoplasm; GO:0036126 …	GO:0005488 binding; GO:0005515 protein binding; GO:0042802 identical protein binding;
CGIg07479	Q6NXB2 PDZ11_DANRE PDZ domain-containing protein 11 OS=Danio rerio OX=7955 GN=pdzd11 PE=2 SV=1	pdzd11	0.377789	7.32903e-05	0.698422	0.00183911	1.44506	0.0903091	1.27933	0.155517	Up	19.2227	7.4	1	1	2363.25	2522.73	2791.28	6647.9	6474.83	7198.85	3299.31	4834.13	2960.68	4949.77	4389.54	4853.73	0.429237	0.458204	0.50698	1.20746	1.17602	1.30753	0.599253	0.878023	0.537749	0.899025	0.797272	0.881583	cytoplasm	K24061	PDZD11; PDZ domain-containing protein 11		GO:0006810 transport; GO:0006836 neurotransmitter transport; GO:0007154 cell communication; GO:0007163 establishment or maintenance of cell polarity; GO:0007267 cell-cell signaling; GO:0007268 chemical synaptic transmission; GO:0007269 neurotransmitter secretion; GO:0008104 protein localization; GO:0009987 cellular process; GO:0023052 signaling; GO:0023061 signal release; GO:0030011 maintenance o…	GO:0005622 intracellular anatomical structure; GO:0005737 cytoplasm; GO:0005829 cytosol; GO:0005886 plasma membrane; GO:0005911 cell-cell junction; GO:0016020 membrane; GO:0016323 basolateral plasma membrane; GO:0030054 cell junction; GO:0045202 synapse; GO:0071944 cell periphery; GO:0098590 plasma membrane region;	GO:0005488 binding; GO:0005515 protein binding;	PF00595	PF00595 PDZ domain	S
CGIg03842	A0A0R4IBK5 R213A_DANRE E3 ubiquitin-protein ligase rnf213-alpha OS=Danio rerio OX=7955 GN=rnf213a PE=3 SV=1	rnf213a	0.650984	7.18506e-05	0.720439	1.01899e-05	1.20111	0.00199644	0.921392	0.00258624	Up	582.017	3.7	17	17	14650.4	14586.1	13664.8	21822.1	22472.9	21607.2	17333.3	16765.4	17430.4	15794.6	15823.4	15860.5	0.843761	0.840063	0.786999	1.2568	1.29429	1.24443	0.99828	0.965573	1.00388	0.90966	0.911321	0.91346	plasma membrane	K22754	RNF213; E3 ubiquitin-protein ligase RNF213 [EC:2.3.2.27]		GO:0000209 protein polyubiquitination; GO:0001525 angiogenesis; GO:0001568 blood vessel development; GO:0001944 vasculature development; GO:0002040 sprouting angiogenesis; GO:0006508 proteolysis; GO:0006511 ubiquitin-dependent protein catabolic process; GO:0006807 nitrogen compound metabolic process; GO:0007275 multicellular organism development; GO:0008152 metabolic process; GO:0009056 catabolic…	GO:0005622 intracellular anatomical structure; GO:0005634 nucleus; GO:0005730 nucleolus; GO:0005737 cytoplasm; GO:0005829 cytosol; GO:0031974 membrane-enclosed lumen; GO:0031981 nuclear lumen; GO:0043226 organelle; GO:0043227 membrane-bounded organelle; GO:0043228 non-membrane-bounded organelle; GO:0043229 intracellular organelle; GO:0043231 intracellular membrane-bounded organelle; GO:0043232 in…	GO:0003824 catalytic activity; GO:0004842 ubiquitin-protein transferase activity; GO:0016462 pyrophosphatase activity; GO:0016740 transferase activity; GO:0016787 hydrolase activity; GO:0016817 hydrolase activity, acting on acid anhydrides; GO:0016818 hydrolase activity, acting on acid anhydrides, in phosphorus-containing anhydrides; GO:0016887 ATP hydrolysis activity; GO:0017111 ribonucleoside t…
CGIg27812	Q5U3V9 SNF8_DANRE Vacuolar-sorting protein SNF8 OS=Danio rerio OX=7955 GN=snf8 PE=2 SV=2	snf8	0.548	7.18484e-05	0.555702	0.000320734	1.14386	0.0296956	0.88652	0.0895445	Up	27.6587	15.9	3	3	10988.9	10610.6	9914.38	18542.6	19168.7	19795.9	11616.6	12673.5	11757.5	11551	10603.6	9802.32	0.666775	0.643818	0.601574	1.12511	1.1631	1.20115	0.704861	0.768988	0.713407	0.700879	0.643392	0.594775	mitochondria	K12188	SNF8, EAP30; ESCRT-II complex subunit VPS22	map04144 Endocytosis	GO:0000003 reproduction; GO:0000578 embryonic axis specification; GO:0003002 regionalization; GO:0003006 developmental process involved in reproduction; GO:0006355 regulation of DNA-templated transcription; GO:0006357 regulation of transcription by RNA polymerase II; GO:0006403 RNA localization; GO:0006508 proteolysis; GO:0006511 ubiquitin-dependent protein catabolic process; GO:0006807 nitrogen …	GO:0000814 ESCRT II complex; GO:0005622 intracellular anatomical structure; GO:0005634 nucleus; GO:0005654 nucleoplasm; GO:0005667 transcription regulator complex; GO:0005737 cytoplasm; GO:0005768 endosome; GO:0005770 late endosome; GO:0005829 cytosol; GO:0005886 plasma membrane; GO:0010008 endosome membrane; GO:0012505 endomembrane system; GO:0016020 membrane; GO:0031090 organelle membrane; GO:0…	GO:0005488 binding; GO:0005515 protein binding; GO:0008134 transcription factor binding; GO:0016247 channel regulator activity; GO:0042802 identical protein binding; GO:0042803 protein homodimerization activity; GO:0046983 protein dimerization activity; GO:0098772 molecular function regulator activity;			K
CGIg22135	Q3T0Y3 ST1B1_BOVIN Sulfotransferase 1B1 OS=Bos taurus OX=9913 GN=SULT1B1 PE=1 SV=1	SULT1B1	0.603039	7.17679e-05	0.829173	0.00392257	1.40734	2.22778e-05	0.977016	0.253924	Up	34.9681	22.1	6	5	37734.2	36637.9	36337.6	61911.9	63669.2	58005.4	50977.7	52131.3	52697	49988.3	50003.9	52232.7	0.716703	0.695881	0.690178	1.17592	1.2093	1.10172	0.968244	0.990153	1.0009	0.949451	0.949748	0.99208	cytoplasm	K01025	SULT1; sulfotransferase [EC:2.8.2.-]					PF00685	PF00685 Sulfotransferase domain	R
CGIg13661	P18426 SCR11_NOTSL S-crystallin SL11 OS=Nototodarus sloanii OX=215440 PE=2 SV=1	--	0.527848	7.14289e-05	0.350741	5.11188e-07	1.36801	0.00469433	0.485723	7.90665e-05	Up	17.6083	20.3	3	1	478902	436851	490027	908082	890055	865093	668454	588077	666592	308994	306916	318194	0.545282	0.497402	0.557948	1.03395	1.01342	0.985001	0.761106	0.669589	0.758987	0.351823	0.349457	0.362298	cytoplasm	K04097	HPGDS; prostaglandin-H2 D-isomerase / glutathione transferase [EC:5.3.99.2 2.5.1.18]	map00480 Glutathione metabolism; map00590 Arachidonic acid metabolism; map00980 Metabolism of xenobiotics by cytochrome P450; map00982 Drug metabolism - cytochrome P450; map01100 Metabolic pathways				PF14497	PF14497 Glutathione S-transferase, C-terminal domain	O
CGIg24178	B3EWZ5 MLRP1_ACRMI MAM and LDL-receptor class A domain-containing protein 1 (Fragment) OS=Acropora millepora OX=45264 PE=1 SV=1	--	0.578183	6.92829e-05	1.3001	0.00115403	1.62433	6.39688e-05	1.38433	0.00028569	Up	165.601	7	9	8	149760	164063	153638	260713	271501	276286	253587	250089	255632	342457	339564	369112	0.617186	0.676132	0.633167	1.07444	1.1189	1.13862	1.04508	1.03066	1.0535	1.41132	1.3994	1.52117	extracellular	K01315	PLG; plasminogen [EC:3.4.21.7]	map04080 Neuroactive ligand-receptor interaction; map04610 Complement and coagulation cascades				PF01400; PF00431; PF00629	PF01400 Astacin (Peptidase family M12A); PF00431 CUB domain; PF00629 MAM domain, meprin/A5/mu	OW
CGIg04501	P61759 PFD3_MOUSE Prefoldin subunit 3 OS=Mus musculus OX=10090 GN=Vbp1 PE=1 SV=2	Vbp1	0.456613	6.66705e-05	0.530704	0.000161734	1.49245	0.000550802	0.77876	0.00347093	Up	29.3706	11.1	3	3	46477.1	51277.6	47257.7	98823.3	109022	109738	75481.8	69032.1	71910.4	52749.6	58190.8	57602.3	0.504417	0.556517	0.512889	1.07253	1.18322	1.19099	0.819206	0.749207	0.780445	0.572492	0.631546	0.625159	cytoplasm,nucleus				GO:0000003 reproduction; GO:0000212 meiotic spindle organization; GO:0000226 microtubule cytoskeleton organization; GO:0000278 mitotic cell cycle; GO:0000280 nuclear division; GO:0006996 organelle organization; GO:0007010 cytoskeleton organization; GO:0007017 microtubule-based process; GO:0007021 tubulin complex assembly; GO:0007049 cell cycle; GO:0007051 spindle organization; GO:0007052 mitotic …	GO:0005622 intracellular anatomical structure; GO:0005634 nucleus; GO:0005737 cytoplasm; GO:0005829 cytosol; GO:0005844 polysome; GO:0016272 prefoldin complex; GO:0032991 protein-containing complex; GO:0043226 organelle; GO:0043227 membrane-bounded organelle; GO:0043229 intracellular organelle; GO:0043231 intracellular membrane-bounded organelle; GO:1990904 ribonucleoprotein complex;	GO:0005488 binding; GO:0005515 protein binding; GO:0008092 cytoskeletal protein binding; GO:0015631 tubulin binding; GO:0048487 beta-tubulin binding;			O
CGIg22690	XP_011431445.2 uncharacterized protein LOC105331098 [Crassostrea gigas]	--	0.492318	6.27932e-05	1.04042	0.0273076	1.74225	0.000233397	1.21298	0.00083159	Up	18.0988	28.7	5	5	109962	95679.7	101741	207750	206382	210227	185029	176741	173768	215794	213080	220724	0.558569	0.48602	0.516809	1.0553	1.04835	1.06788	0.939881	0.897782	0.882683	1.09616	1.08237	1.1212	extracellular
CGIg16998	XP_011435860.2 uncharacterized protein LOC105334195 [Crassostrea gigas]	--	0.610443	6.25581e-05	1.01242	0.834201	0.921755	0.0946638	1.79929	0.000444641	Up	78.8239	9.8	7	7	16418	15600.7	16317.5	25286.8	27384.1	26511.1	14482.5	14202.9	15868.7	26033.7	25116.5	29015.6	0.574064	0.545487	0.570551	0.884168	0.957502	0.926976	0.50639	0.496611	0.554858	0.910285	0.878214	1.01455	cytoplasm							PF13676	PF13676 TIR domain
CGIg12270	XP_019920993.2 uncharacterized protein LOC105323990 [Crassostrea gigas]	--	0.0201015	6.24425e-05	2.31494	6.27942e-05	129.741	2.55087e-05	0.88763	0.0371765	Up	19.4246	6.4	1	1	1660.98	918.458	1877.63	80608.7	69023.7	72095.1	188203	183498	206564	170375	175395	167516	0.0029065	0.00160719	0.00328562	0.141055	0.120783	0.126157	0.329332	0.321098	0.361462	0.298134	0.306919	0.293132	extracellular							PF13202	PF13202 EF hand
CGIg16459	Q9UNH7 SNX6_HUMAN Sorting nexin-6 OS=Homo sapiens OX=9606 GN=SNX6 PE=1 SV=1	SNX6	0.567024	6.2199e-05	0.524167	6.27514e-06	1.22152	0.00436764	0.756777	0.000310946	Up	46.5657	22.4	7	7	75822.5	84009.3	76916.2	137877	140148	139502	93995.3	97020.8	98176.7	71756.2	75897.7	71200.5	0.57598	0.638171	0.584288	1.04737	1.06463	1.05972	0.714028	0.737012	0.745792	0.545091	0.576551	0.540869	cytoplasm	K17920	SNX5_6_32; sorting nexin-5/6/32	map04144 Endocytosis	GO:0001932 regulation of protein phosphorylation; GO:0001933 negative regulation of protein phosphorylation; GO:0003008 system process; GO:0003013 circulatory system process; GO:0006355 regulation of DNA-templated transcription; GO:0006469 negative regulation of protein kinase activity; GO:0006807 nitrogen compound metabolic process; GO:0006810 transport; GO:0006886 intracellular protein transpor…	GO:0000323 lytic vacuole; GO:0001726 ruffle; GO:0001891 phagocytic cup; GO:0005622 intracellular anatomical structure; GO:0005737 cytoplasm; GO:0005764 lysosome; GO:0005768 endosome; GO:0005769 early endosome; GO:0005773 vacuole; GO:0005829 cytosol; GO:0005886 plasma membrane; GO:0005903 brush border; GO:0009898 cytoplasmic side of plasma membrane; GO:0010008 endosome membrane; GO:0012505 endomem…	GO:0001664 G protein-coupled receptor binding; GO:0005102 signaling receptor binding; GO:0005126 cytokine receptor binding; GO:0005160 transforming growth factor beta receptor binding; GO:0005488 binding; GO:0005515 protein binding; GO:0005543 phospholipid binding; GO:0008092 cytoskeletal protein binding; GO:0008289 lipid binding; GO:0010314 phosphatidylinositol-5-phosphate binding; GO:0031748 D1…	PF00787; PF09325	PF00787 PX domain; PF09325 Vps5 C terminal like	V
CGIg09189	XP_011456631.1 uncharacterized protein LOC105348759 [Crassostrea gigas]	--	0.502485	5.46131e-05	0.760454	0.000537096	1.38151	0.00139598	1.09545	0.0423785	Up	14.7308	32.5	4	4	9386.9	9917.79	10495.5	19269	20565.2	19471.2	13261.4	13494.4	14413.6	14947.7	15540.7	14610.7	0.461212	0.487297	0.51568	0.946758	1.01044	0.956691	0.651579	0.663028	0.70819	0.734435	0.763572	0.717876	cytoplasm
CGIg20686	A4IFG2 BTBD9_BOVIN BTB/POZ domain-containing protein 9 OS=Bos taurus OX=9913 GN=BTBD9 PE=2 SV=2	BTBD9	0.384572	5.31974e-05	0.578469	0.000747386	2.54266	3.59521e-06	0.59158	0.000148764	Up	39.4161	10.1	3	3	3167.58	3065.04	2899.58	8119.08	8400.1	7227.2	7711.5	7792.41	7716.18	4660.98	4820.73	4254.83	0.563856	0.545604	0.516151	1.44527	1.49529	1.28651	1.37271	1.38712	1.37355	0.829696	0.858133	0.757396	cytoplasm	K10523	SPOP; speckle-type POZ protein	map04340 Hedgehog signaling pathway; map04341 Hedgehog signaling pathway - fly				PF00651	PF00651 BTB/POZ domain	R
CGIg16234	Q2M2T5 COMD1_BOVIN COMM domain-containing protein 1 OS=Bos taurus OX=9913 GN=COMMD1 PE=2 SV=1	COMMD1	0.538963	5.17918e-05	0.572827	9.56187e-05	1.344	0.000149069	0.790798	0.000589126	Up	22.2301	5.8	1	1	16240.5	16824.7	15701.4	28551.3	31048.8	30882.2	21562.8	22060.7	21918.8	16497.7	17663.8	17669.2	0.592988	0.614316	0.573302	1.04249	1.13368	1.1276	0.787317	0.805497	0.800319	0.602378	0.644954	0.645152	mitochondria	K22557	COMMD1, MURR1; COMM domain containing 1		GO:0002028 regulation of sodium ion transport; GO:0006355 regulation of DNA-templated transcription; GO:0006807 nitrogen compound metabolic process; GO:0006810 transport; GO:0006873 intracellular monoatomic ion homeostasis; GO:0006878 intracellular copper ion homeostasis; GO:0006892 post-Golgi vesicle-mediated transport; GO:0006893 Golgi to plasma membrane transport; GO:0008152 metabolic process;…	GO:0000151 ubiquitin ligase complex; GO:0005622 intracellular anatomical structure; GO:0005634 nucleus; GO:0005654 nucleoplasm; GO:0005737 cytoplasm; GO:0005768 endosome; GO:0005769 early endosome; GO:0005829 cytosol; GO:0012505 endomembrane system; GO:0031410 cytoplasmic vesicle; GO:0031461 cullin-RING ubiquitin ligase complex; GO:0031462 Cul2-RING ubiquitin ligase complex; GO:0031974 membrane-e…	GO:0005102 signaling receptor binding; GO:0005488 binding; GO:0005507 copper ion binding; GO:0005515 protein binding; GO:0005543 phospholipid binding; GO:0005546 phosphatidylinositol-4,5-bisphosphate binding; GO:0005547 phosphatidylinositol-3,4,5-trisphosphate binding; GO:0008200 ion channel inhibitor activity; GO:0008289 lipid binding; GO:0016247 channel regulator activity; GO:0016248 channel in…	PF17221; PF07258	PF17221 COMMD1 N-terminal domain; PF07258 COMM domain
CGIg16907	Q86IC9 CAMT1_DICDI Probable caffeoyl-CoA O-methyltransferase 1 OS=Dictyostelium discoideum OX=44689 GN=omt5 PE=3 SV=1	omt5	0.411745	4.9052e-05	0.540711	0.00202992	0.549221	0.0132681	2.39106	0.00554086	Up	31.0574	20.7	6	1	20353.6	20441.1	21716.1	54724.2	47285.2	49809.9	13590.9	12288	8453.39	29151.4	23413.6	29525.5	0.468657	0.470671	0.500031	1.26007	1.08878	1.14691	0.31294	0.28294	0.194646	0.671232	0.539116	0.679846	cytoplasm							PF01596	PF01596 O-methyltransferase	Q
CGIg10412	P45885 ACT2_BACDO Actin-2, muscle-specific OS=Bactrocera dorsalis OX=27457 PE=2 SV=1	--	0.265005	4.88327e-05	0.266406	4.47779e-05	1.01274	0.730338	0.992644	0.824366	Up	42.1082	2.4	1	1	35664	36917.7	33762.8	118589	133587	149117	36533	34285.8	36880.6	34239.9	36672.8	35994.3	0.447	0.462714	0.423171	1.48635	1.67433	1.86898	0.457892	0.429726	0.462248	0.429151	0.459644	0.45114	cytoskeleton	K05692	ACTB_G1; actin beta/gamma 1	map04015 Rap1 signaling pathway; map04145 Phagosome; map04210 Apoptosis; map04390 Hippo signaling pathway; map04391 Hippo signaling pathway - fly; map04510 Focal adhesion; map04520 Adherens junction; map04530 Tight junction; map04611 Platelet activation; map04613 Neutrophil extracellular trap formation; map04670 Leukocyte transendothelial migration; map04714 Thermogenesis; map04745 Phototransduct…	GO:0000278 mitotic cell cycle; GO:0000281 mitotic cytokinesis; GO:0000910 cytokinesis; GO:0006325 chromatin organization; GO:0006338 chromatin remodeling; GO:0006473 protein acetylation; GO:0006475 internal protein amino acid acetylation; GO:0006807 nitrogen compound metabolic process; GO:0006996 organelle organization; GO:0007010 cytoskeleton organization; GO:0007049 cell cycle; GO:0007275 multi…	GO:0000123 histone acetyltransferase complex; GO:0005622 intracellular anatomical structure; GO:0005634 nucleus; GO:0005654 nucleoplasm; GO:0005737 cytoplasm; GO:0005856 cytoskeleton; GO:0005884 actin filament; GO:0005886 plasma membrane; GO:0005912 adherens junction; GO:0005925 focal adhesion; GO:0015629 actin cytoskeleton; GO:0016020 membrane; GO:0030054 cell junction; GO:0030055 cell-substrate…	GO:0005198 structural molecule activity; GO:0005200 structural constituent of cytoskeleton;			Z
CGIg13560	Q6DGZ3 THOC7_DANRE THO complex subunit 7 homolog OS=Danio rerio OX=7955 GN=thoc7 PE=2 SV=1	thoc7	0.134945	4.8242e-05	0.523186	0.00180398	6.4507	5.3328e-05	0.601027	0.00337386	Up	23.1448	11.1	2	2	583.525	830.284	724.742	5563.43	4976.48	5307.72	4644.58	4599.38	4551.19	2428.71	3212.07	2650.48	0.143889	0.204736	0.178711	1.37187	1.22713	1.30881	1.14529	1.13414	1.12226	0.598886	0.792051	0.653571	cytoplasm	K13176	THOC7; THO complex subunit 7	map03013 Nucleocytoplasmic transport	GO:0006139 nucleobase-containing compound metabolic process; GO:0006396 RNA processing; GO:0006397 mRNA processing; GO:0006403 RNA localization; GO:0006405 RNA export from nucleus; GO:0006406 mRNA export from nucleus; GO:0006611 protein export from nucleus; GO:0006725 cellular aromatic compound metabolic process; GO:0006807 nitrogen compound metabolic process; GO:0006810 transport; GO:0006886 int…	GO:0000346 transcription export complex; GO:0000347 THO complex; GO:0000445 THO complex part of transcription export complex; GO:0000781 chromosome, telomeric region; GO:0005622 intracellular anatomical structure; GO:0005634 nucleus; GO:0005654 nucleoplasm; GO:0005694 chromosome; GO:0005737 cytoplasm; GO:0005829 cytosol; GO:0016604 nuclear body; GO:0016607 nuclear speck; GO:0031974 membrane-enclo…				S
[truncated: 88 more rows]
[truncated: 2 more columns]

## Sheet: ERK_mediated upregulated
Protein accession	Protein description	Gene name	SW_0/SW_12 Ratio	SW_0/SW_12 P value	ERK_12/SW_12 Ratio	ERK_12/SW_12 P value	ERK_0/SW_0 Ratio	ERK_0/SW_0 P value	ERK_12/ERK_0 Ratio	ERK_12/ERK_0 P value	SW-12 vs SW-0 Regulation Type	MW [kDa]	Coverage [%]	Peptides	Unique peptides	Intensity SW_0_1	Intensity SW_0_2	Intensity SW_0_3	Intensity SW_12_1	Intensity SW_12_2	Intensity SW_12_3	Intensity ERK_0_1	Intensity ERK_0_2	Intensity ERK_0_3	Intensity ERK_12_1	Intensity ERK_12_2	Intensity ERK_12_3	SW_0_1	SW_0_2	SW_0_3	SW_12_1	SW_12_2	SW_12_3	ERK_0_1	ERK_0_2	ERK_0_3	ERK_12_1	ERK_12_2	ERK_12_3	Subcellular localization	KEGG KO No.	KEGG Gene	KEGG pathway	Biological Process	Cellular Component	Molecular Function	Pfam ID	Domain description	KOG category
[truncated: 278 more rows]
[truncated: 2 more columns]

[truncated: 2 more sheets: Downregulated under heat stress, ERK_mediated downregulated]
