# Supplementary material for: A Naturally Synonymous Mutation in SHOC2 Modulates ERK-PFK Cascade to Mediate Thermotolerance Divergence Among Oysters
Source: Research Square preprint supplement (doi:10.21203/rs.3.rs-7424750/v1), 2025-10-07
Supplement: Supplementary file 4 [file 9ce44f2559339b54501e9766.xlsx]

## Sheet: Upregulated under heat stress
Protein accession	Position	Amino acid	SW_0/SW_12 Ratio	SW_0/SW_12 P value	Protein description	Gene name	Modified sequence	Localization probability	SW-12 vs SW-0 Regulation Type	SW_0_1	SW_0_2	SW_0_3	SW_12_1	SW_12_2	SW_12_3	ERK_0_1	ERK_0_2	ERK_0_3	ERK_12_1	ERK_12_2	ERK_12_3	Subcellular localization	KEGG KO No.	KEGG Gene	KEGG pathway	Biological Process	Cellular Component	Molecular Function	Pfam ID	Domain description	Site Domain	KOG category	KOG NO.	KOG description
CGIg00119	1974	S	0.584303	0.00330545	Q9Y4G6 TLN2_HUMAN Talin-2 OS=Homo sapiens OX=9606 GN=TLN2 PE=1 SV=4	TLN2	_TTVQDLGKS[Phospho (STY)]C[Carbamidomethyl (C)]VELVQDAGK_	1	Up	0.691254	0.647941	0.525069	1.03764	1.03554	1.1174	0.655535	0.745432	0.862617	0.917317	0.952172	0.765108	nucleus	K06271	TLN; talin	map04015 Rap1 signaling pathway; map04510 Focal adhesion; map04611 Platelet activation	GO:0000003 reproduction; GO:0001667 ameboidal-type cell migration; GO:0001700 embryonic development via the syncytial blastoderm; GO:0001708 cell fate specification; GO:0001894 tissue homeostasis; GO:0002009 morphogenesis of an epithelium; GO:0002064 epithelial cell development; GO:0002065 columnar/cuboidal epithelial cell differentiation; GO:0002066 columnar/cuboidal epithelial cell development;…	GO:0001726 ruffle; GO:0005576 extracellular region; GO:0005604 basement membrane; GO:0005622 intracellular anatomical structure; GO:0005737 cytoplasm; GO:0005829 cytosol; GO:0005856 cytoskeleton; GO:0005886 plasma membrane; GO:0005911 cell-cell junction; GO:0005912 adherens junction; GO:0005916 fascia adherens; GO:0005925 focal adhesion; GO:0014704 intercalated disc; GO:0015629 actin cytoskeleton…	GO:0001786 phosphatidylserine binding; GO:0003779 actin binding; GO:0005102 signaling receptor binding; GO:0005178 integrin binding; GO:0005198 structural molecule activity; GO:0005200 structural constituent of cytoskeleton; GO:0005488 binding; GO:0005515 protein binding; GO:0005543 phospholipid binding; GO:0008092 cytoskeletal protein binding; GO:0008289 lipid binding; GO:0017166 vinculin bindin…	PF16511; PF00373; PF09141; PF08913	PF16511 N-terminal or F0 domain of Talin-head FERM; PF00373 FERM central domain; PF09141 Talin, middle domain; PF08913 Vinculin Binding Site	PF08913 Vinculin Binding Site	Z	KOG4261	Talin
CGIg00119	667	S	0.537902	0.0495389	Q9Y4G6 TLN2_HUMAN Talin-2 OS=Homo sapiens OX=9606 GN=TLN2 PE=1 SV=4	TLN2	_LC[Carbamidomethyl (C)]GAFS[Phospho (STY)]DLLNAAEPGQK_	1	Up	0.574083	0.787095	0.404612	1.3762	1.00002	0.906521	1.1927	0.510435	1.09663	1.1201	1.21611	0.970927	nucleus	K06271	TLN; talin	map04015 Rap1 signaling pathway; map04510 Focal adhesion; map04611 Platelet activation	GO:0000003 reproduction; GO:0001667 ameboidal-type cell migration; GO:0001700 embryonic development via the syncytial blastoderm; GO:0001708 cell fate specification; GO:0001894 tissue homeostasis; GO:0002009 morphogenesis of an epithelium; GO:0002064 epithelial cell development; GO:0002065 columnar/cuboidal epithelial cell differentiation; GO:0002066 columnar/cuboidal epithelial cell development;…	GO:0001726 ruffle; GO:0005576 extracellular region; GO:0005604 basement membrane; GO:0005622 intracellular anatomical structure; GO:0005737 cytoplasm; GO:0005829 cytosol; GO:0005856 cytoskeleton; GO:0005886 plasma membrane; GO:0005911 cell-cell junction; GO:0005912 adherens junction; GO:0005916 fascia adherens; GO:0005925 focal adhesion; GO:0014704 intercalated disc; GO:0015629 actin cytoskeleton…	GO:0001786 phosphatidylserine binding; GO:0003779 actin binding; GO:0005102 signaling receptor binding; GO:0005178 integrin binding; GO:0005198 structural molecule activity; GO:0005200 structural constituent of cytoskeleton; GO:0005488 binding; GO:0005515 protein binding; GO:0005543 phospholipid binding; GO:0008092 cytoskeletal protein binding; GO:0008289 lipid binding; GO:0017166 vinculin bindin…	PF16511; PF00373; PF09141; PF08913	PF16511 N-terminal or F0 domain of Talin-head FERM; PF00373 FERM central domain; PF09141 Talin, middle domain; PF08913 Vinculin Binding Site	PF09141 Talin, middle domain	Z	KOG4261	Talin
CGIg00119	2155	S	0.515837	0.0222165	Q9Y4G6 TLN2_HUMAN Talin-2 OS=Homo sapiens OX=9606 GN=TLN2 PE=1 SV=4	TLN2	_NVS[Phospho (STY)]DPAMMTLK_	1	Up	0.606618	1.07871	0.783562	1.70532	1.33006	1.75079	0.920928	0.839332	0.902882	0.888513	1.38868	1.13651	nucleus	K06271	TLN; talin	map04015 Rap1 signaling pathway; map04510 Focal adhesion; map04611 Platelet activation	GO:0000003 reproduction; GO:0001667 ameboidal-type cell migration; GO:0001700 embryonic development via the syncytial blastoderm; GO:0001708 cell fate specification; GO:0001894 tissue homeostasis; GO:0002009 morphogenesis of an epithelium; GO:0002064 epithelial cell development; GO:0002065 columnar/cuboidal epithelial cell differentiation; GO:0002066 columnar/cuboidal epithelial cell development;…	GO:0001726 ruffle; GO:0005576 extracellular region; GO:0005604 basement membrane; GO:0005622 intracellular anatomical structure; GO:0005737 cytoplasm; GO:0005829 cytosol; GO:0005856 cytoskeleton; GO:0005886 plasma membrane; GO:0005911 cell-cell junction; GO:0005912 adherens junction; GO:0005916 fascia adherens; GO:0005925 focal adhesion; GO:0014704 intercalated disc; GO:0015629 actin cytoskeleton…	GO:0001786 phosphatidylserine binding; GO:0003779 actin binding; GO:0005102 signaling receptor binding; GO:0005178 integrin binding; GO:0005198 structural molecule activity; GO:0005200 structural constituent of cytoskeleton; GO:0005488 binding; GO:0005515 protein binding; GO:0005543 phospholipid binding; GO:0008092 cytoskeletal protein binding; GO:0008289 lipid binding; GO:0017166 vinculin bindin…	PF16511; PF00373; PF09141; PF08913	PF16511 N-terminal or F0 domain of Talin-head FERM; PF00373 FERM central domain; PF09141 Talin, middle domain; PF08913 Vinculin Binding Site		Z	KOG4261	Talin
CGIg00119	1325	S	0.361623	0.0147442	Q9Y4G6 TLN2_HUMAN Talin-2 OS=Homo sapiens OX=9606 GN=TLN2 PE=1 SV=4	TLN2	_EYSSS[Phospho (STY)]YSEFIK_	0.999498	Up		0.431192	0.482857	1.3692	1.15844					1.58427	1.5636	1.30429	nucleus	K06271	TLN; talin	map04015 Rap1 signaling pathway; map04510 Focal adhesion; map04611 Platelet activation	GO:0000003 reproduction; GO:0001667 ameboidal-type cell migration; GO:0001700 embryonic development via the syncytial blastoderm; GO:0001708 cell fate specification; GO:0001894 tissue homeostasis; GO:0002009 morphogenesis of an epithelium; GO:0002064 epithelial cell development; GO:0002065 columnar/cuboidal epithelial cell differentiation; GO:0002066 columnar/cuboidal epithelial cell development;…	GO:0001726 ruffle; GO:0005576 extracellular region; GO:0005604 basement membrane; GO:0005622 intracellular anatomical structure; GO:0005737 cytoplasm; GO:0005829 cytosol; GO:0005856 cytoskeleton; GO:0005886 plasma membrane; GO:0005911 cell-cell junction; GO:0005912 adherens junction; GO:0005916 fascia adherens; GO:0005925 focal adhesion; GO:0014704 intercalated disc; GO:0015629 actin cytoskeleton…	GO:0001786 phosphatidylserine binding; GO:0003779 actin binding; GO:0005102 signaling receptor binding; GO:0005178 integrin binding; GO:0005198 structural molecule activity; GO:0005200 structural constituent of cytoskeleton; GO:0005488 binding; GO:0005515 protein binding; GO:0005543 phospholipid binding; GO:0008092 cytoskeletal protein binding; GO:0008289 lipid binding; GO:0017166 vinculin bindin…	PF16511; PF00373; PF09141; PF08913	PF16511 N-terminal or F0 domain of Talin-head FERM; PF00373 FERM central domain; PF09141 Talin, middle domain; PF08913 Vinculin Binding Site	PF08913 Vinculin Binding Site	Z	KOG4261	Talin
CGIg00119	481	S	0.212371	0.000366555	Q9Y4G6 TLN2_HUMAN Talin-2 OS=Homo sapiens OX=9606 GN=TLN2 PE=1 SV=4	TLN2	_MQGNVS[Phospho (STY)]HPDVGNVALPGVMR_	1	Up	0.428442	0.278444	0.400379	1.79601	1.82145	1.59635	0.690791	0.573652	0.656247	1.97385	1.90726	1.39062	nucleus	K06271	TLN; talin	map04015 Rap1 signaling pathway; map04510 Focal adhesion; map04611 Platelet activation	GO:0000003 reproduction; GO:0001667 ameboidal-type cell migration; GO:0001700 embryonic development via the syncytial blastoderm; GO:0001708 cell fate specification; GO:0001894 tissue homeostasis; GO:0002009 morphogenesis of an epithelium; GO:0002064 epithelial cell development; GO:0002065 columnar/cuboidal epithelial cell differentiation; GO:0002066 columnar/cuboidal epithelial cell development;…	GO:0001726 ruffle; GO:0005576 extracellular region; GO:0005604 basement membrane; GO:0005622 intracellular anatomical structure; GO:0005737 cytoplasm; GO:0005829 cytosol; GO:0005856 cytoskeleton; GO:0005886 plasma membrane; GO:0005911 cell-cell junction; GO:0005912 adherens junction; GO:0005916 fascia adherens; GO:0005925 focal adhesion; GO:0014704 intercalated disc; GO:0015629 actin cytoskeleton…	GO:0001786 phosphatidylserine binding; GO:0003779 actin binding; GO:0005102 signaling receptor binding; GO:0005178 integrin binding; GO:0005198 structural molecule activity; GO:0005200 structural constituent of cytoskeleton; GO:0005488 binding; GO:0005515 protein binding; GO:0005543 phospholipid binding; GO:0008092 cytoskeletal protein binding; GO:0008289 lipid binding; GO:0017166 vinculin bindin…	PF16511; PF00373; PF09141; PF08913	PF16511 N-terminal or F0 domain of Talin-head FERM; PF00373 FERM central domain; PF09141 Talin, middle domain; PF08913 Vinculin Binding Site		Z	KOG4261	Talin
CGIg00120	706	S	0.532538	5.63161e-05	Q8IV35 WDR49_HUMAN WD repeat-containing protein 49 OS=Homo sapiens OX=9606 GN=WDR49 PE=2 SV=1	WDR49	_QKS[Phospho (STY)]FMQAR_	1	Up	0.770883	0.830432	0.757923	1.53726	1.46028	1.43264	0.643981	0.699221	0.642991	1.4111	1.24991	1.29118	nucleus	K24747	WDR49; WD repeat-containing protein 49								A	KOG0265	U5 snRNP-specific protein-like factor and related proteins
CGIg00180	507	S	0.571846	0.00951699	Q92828 COR2A_HUMAN Coronin-2A OS=Homo sapiens OX=9606 GN=CORO2A PE=1 SV=2	CORO2A	_KVWS[Phospho (STY)]PTSPSK_	1	Up	1.11118	0.980363	0.78998	1.49353	1.65498	1.89048	1.29154	1.23751	1.24142	1.33262	0.187803	1.59889	nucleus	K13887	CORO2; coronin-2					PF08953	PF08953 Domain of unknown function (DUF1899)		Z	KOG0303	Actin-binding protein Coronin, contains WD40 repeats
CGIg00180	509	T	0.558734	0.00456914	Q92828 COR2A_HUMAN Coronin-2A OS=Homo sapiens OX=9606 GN=CORO2A PE=1 SV=2	CORO2A	_KVWS[Phospho (STY)]PT[Phospho (STY)]SPSK_	0.999998	Up	1.05957	0.949793	0.802075	1.51618	1.64141	1.87422	1.3298	1.24505	1.24086	1.24874		1.52994	nucleus	K13887	CORO2; coronin-2					PF08953	PF08953 Domain of unknown function (DUF1899)		Z	KOG0303	Actin-binding protein Coronin, contains WD40 repeats
CGIg00599	596	S	0.538829	0.000384945	Q92122 KPYM_XENLA Pyruvate kinase PKM OS=Xenopus laevis OX=8355 GN=pkm PE=2 SV=1	pkm	_SSEASLPDS[Phospho (STY)]TK_	0.969452	Up	0.783107	0.921535	0.844135	1.61089	1.48227	1.63705	0.248968		0.2455	1.50523	1.48326		cytoplasm	K00873	PK, pyk; pyruvate kinase [EC:2.7.1.40]	map00010 Glycolysis / Gluconeogenesis; map00620 Pyruvate metabolism; map01100 Metabolic pathways; map01200 Carbon metabolism; map01230 Biosynthesis of amino acids; map04922 Glucagon signaling pathway	GO:0000768 syncytium formation by plasma membrane fusion; GO:0001666 response to hypoxia; GO:0001775 cell activation; GO:0001889 liver development; GO:0002252 immune effector process; GO:0002263 cell activation involved in immune response; GO:0002274 myeloid leukocyte activation; GO:0002275 myeloid cell activation involved in immune response; GO:0002283 neutrophil activation involved in immune re…	GO:0001917 photoreceptor inner segment; GO:0005576 extracellular region; GO:0005622 intracellular anatomical structure; GO:0005634 nucleus; GO:0005737 cytoplasm; GO:0005829 cytosol; GO:0005886 plasma membrane; GO:0005929 cilium; GO:0012505 endomembrane system; GO:0016020 membrane; GO:0030141 secretory granule; GO:0031410 cytoplasmic vesicle; GO:0031974 membrane-enclosed lumen; GO:0031982 vesicle;…	GO:0000166 nucleotide binding; GO:0003824 catalytic activity; GO:0004743 pyruvate kinase activity; GO:0005488 binding; GO:0005515 protein binding; GO:0016740 transferase activity; GO:0016772 transferase activity, transferring phosphorus-containing groups; GO:0016773 phosphotransferase activity, alcohol group as acceptor; GO:0017076 purine nucleotide binding; GO:0030554 adenyl nucleotide binding; …	PF00224; PF02887	PF00224 Pyruvate kinase, barrel domain; PF02887 Pyruvate kinase, alpha/beta domain		G	KOG2323	Pyruvate kinase
CGIg00599	11	S	0.329714	4.87413e-05	Q92122 KPYM_XENLA Pyruvate kinase PKM OS=Xenopus laevis OX=8355 GN=pkm PE=2 SV=1	pkm	_TPGS[Phospho (STY)]GEIPVILEPEDPTPK_	0.997851	Up	0.494529	0.529419	0.556434	1.45386	1.62399	1.71533	0.474715	0.459275	0.463689	1.24756	1.37973	1.12253	cytoplasm	K00873	PK, pyk; pyruvate kinase [EC:2.7.1.40]	map00010 Glycolysis / Gluconeogenesis; map00620 Pyruvate metabolism; map01100 Metabolic pathways; map01200 Carbon metabolism; map01230 Biosynthesis of amino acids; map04922 Glucagon signaling pathway	GO:0000768 syncytium formation by plasma membrane fusion; GO:0001666 response to hypoxia; GO:0001775 cell activation; GO:0001889 liver development; GO:0002252 immune effector process; GO:0002263 cell activation involved in immune response; GO:0002274 myeloid leukocyte activation; GO:0002275 myeloid cell activation involved in immune response; GO:0002283 neutrophil activation involved in immune re…	GO:0001917 photoreceptor inner segment; GO:0005576 extracellular region; GO:0005622 intracellular anatomical structure; GO:0005634 nucleus; GO:0005737 cytoplasm; GO:0005829 cytosol; GO:0005886 plasma membrane; GO:0005929 cilium; GO:0012505 endomembrane system; GO:0016020 membrane; GO:0030141 secretory granule; GO:0031410 cytoplasmic vesicle; GO:0031974 membrane-enclosed lumen; GO:0031982 vesicle;…	GO:0000166 nucleotide binding; GO:0003824 catalytic activity; GO:0004743 pyruvate kinase activity; GO:0005488 binding; GO:0005515 protein binding; GO:0016740 transferase activity; GO:0016772 transferase activity, transferring phosphorus-containing groups; GO:0016773 phosphotransferase activity, alcohol group as acceptor; GO:0017076 purine nucleotide binding; GO:0030554 adenyl nucleotide binding; …	PF00224; PF02887	PF00224 Pyruvate kinase, barrel domain; PF02887 Pyruvate kinase, alpha/beta domain		G	KOG2323	Pyruvate kinase
CGIg00640	351	S	0.514248	0.000588534	Q5H8C4 VP13A_MOUSE Vacuolar protein sorting-associated protein 13A OS=Mus musculus OX=10090 GN=Vps13a PE=1 SV=1	Vps13a	_MFS[Phospho (STY)]WDHIIHHR_	1	Up	1.04548	0.98158	0.861546	1.74221	1.91202	1.96292	1.00415	0.970249	0.965238	0.357733	0.373785		cytoplasm	K19525	VPS13A_C; vacuolar protein sorting-associated protein 13A/C		GO:0006810 transport; GO:0006892 post-Golgi vesicle-mediated transport; GO:0006895 Golgi to endosome transport; GO:0006914 autophagy; GO:0006996 organelle organization; GO:0007005 mitochondrion organization; GO:0007275 multicellular organism development; GO:0007399 nervous system development; GO:0007610 behavior; GO:0007626 locomotory behavior; GO:0008104 protein localization; GO:0008152 metaboli…	GO:0005622 intracellular anatomical structure; GO:0005737 cytoplasm; GO:0005739 mitochondrion; GO:0005740 mitochondrial envelope; GO:0005741 mitochondrial outer membrane; GO:0005829 cytosol; GO:0012505 endomembrane system; GO:0016020 membrane; GO:0019867 outer membrane; GO:0030141 secretory granule; GO:0031045 dense core granule; GO:0031090 organelle membrane; GO:0031410 cytoplasmic vesicle; GO:0…					U	KOG1809	Vacuolar protein sorting-associated protein
CGIg00640	1841	S	0.353456	2.76662e-07	Q5H8C4 VP13A_MOUSE Vacuolar protein sorting-associated protein 13A OS=Mus musculus OX=10090 GN=Vps13a PE=1 SV=1	Vps13a	_NDELAPEDDEEDEDS[Phospho (STY)]KNIVLPPPK_	1	Up	0.534088	0.509076	0.517016	1.46635	1.48782	1.4599	0.522963	0.500503	0.557495	1.43754	1.33667	1.48034	cytoplasm	K19525	VPS13A_C; vacuolar protein sorting-associated protein 13A/C		GO:0006810 transport; GO:0006892 post-Golgi vesicle-mediated transport; GO:0006895 Golgi to endosome transport; GO:0006914 autophagy; GO:0006996 organelle organization; GO:0007005 mitochondrion organization; GO:0007275 multicellular organism development; GO:0007399 nervous system development; GO:0007610 behavior; GO:0007626 locomotory behavior; GO:0008104 protein localization; GO:0008152 metaboli…	GO:0005622 intracellular anatomical structure; GO:0005737 cytoplasm; GO:0005739 mitochondrion; GO:0005740 mitochondrial envelope; GO:0005741 mitochondrial outer membrane; GO:0005829 cytosol; GO:0012505 endomembrane system; GO:0016020 membrane; GO:0019867 outer membrane; GO:0030141 secretory granule; GO:0031045 dense core granule; GO:0031090 organelle membrane; GO:0031410 cytoplasmic vesicle; GO:0…					U	KOG1809	Vacuolar protein sorting-associated protein
CGIg00731	501	S	0.41783	0.000758169	Q6DFB7 POC5_XENLA Centrosomal protein POC5 OS=Xenopus laevis OX=8355 GN=poc5 PE=2 SV=1	poc5	_IDSHRPS[Phospho (STY)]SATVGGVR_	0.998098	Up	0.861353	0.78576	0.795237	2.07594		1.82095	0.84821	0.827884	0.974046				cytoplasm,nucleus	K16483	POC5; centrosomal protein POC5			GO:0005622 intracellular anatomical structure; GO:0005634 nucleus; GO:0005654 nucleoplasm; GO:0005737 cytoplasm; GO:0005813 centrosome; GO:0005815 microtubule organizing center; GO:0005829 cytosol; GO:0005856 cytoskeleton; GO:0015630 microtubule cytoskeleton; GO:0031974 membrane-enclosed lumen; GO:0031981 nuclear lumen; GO:0043226 organelle; GO:0043227 membrane-bounded organelle; GO:0043228 non-m…
CGIg00778	372	S	0.233486	0.000218536	Q9ERE8 TLRN1_MOUSE Talin rod domain-containing protein 1 OS=Mus musculus OX=10090 GN=Tlnrd1 PE=1 SV=1	Tlnrd1	_EEFPAHGKS[Phospho (STY)]PES[Phospho (STY)]PPHEK_	1	Up	0.467796	0.411676	0.324971	1.73082	1.58831	1.8394	0.433138	0.355058	0.622629	2.33496	1.72814	1.72975	plasma membrane						GO:0003779 actin binding; GO:0005488 binding; GO:0005515 protein binding; GO:0008092 cytoskeletal protein binding;				Z	KOG4261	Talin
CGIg00780	100	S	0.410076	0.0033437	Q8N6V9 TEX9_HUMAN Testis-expressed protein 9 OS=Homo sapiens OX=9606 GN=TEX9 PE=1 SV=1	TEX9	_LLDNINS[Phospho (STY)]EEFLK_	1	Up	0.603699	0.500559	0.499508	1.08853	1.17981	1.64255	0.666703	0.657165	0.851512	1.26286	1.16403	1.33565	nucleus
CGIg00780	126	S	0.360885	0.0149784	Q8N6V9 TEX9_HUMAN Testis-expressed protein 9 OS=Homo sapiens OX=9606 GN=TEX9 PE=1 SV=1	TEX9	_EFDDDITGPNENTETSPKPS[Phospho (STY)]S[Phospho (STY)]RPSSK_	0.999958	Up	0.618286	0.543895	0.704727	1.33229		2.11647		1.08044	0.667323	3.09014			nucleus
CGIg00859	211	S	0.594595	0.0272302	P15884 ITF2_HUMAN Transcription factor 4 OS=Homo sapiens OX=9606 GN=TCF4 PE=1 SV=3	TCF4	_S[Phospho (STY)]PYFYNK_	1	Up	0.711729	0.785004	0.771412	1.65503	1.0461	1.11348	0.580164	0.82089	0.670465	1.16986	1.01506	1.34721	nucleus	K15603	TCF4_12; transcription factor 4/12		GO:0000003 reproduction; GO:0000122 negative regulation of transcription by RNA polymerase II; GO:0001655 urogenital system development; GO:0001708 cell fate specification; GO:0001709 cell fate determination; GO:0001775 cell activation; GO:0002065 columnar/cuboidal epithelial cell differentiation; GO:0002119 nematode larval development; GO:0002164 larval development; GO:0003006 developmental proc…	GO:0000228 nuclear chromosome; GO:0000785 chromatin; GO:0005622 intracellular anatomical structure; GO:0005634 nucleus; GO:0005667 transcription regulator complex; GO:0005694 chromosome; GO:0005737 cytoplasm; GO:0031974 membrane-enclosed lumen; GO:0031981 nuclear lumen; GO:0032991 protein-containing complex; GO:0043226 organelle; GO:0043227 membrane-bounded organelle; GO:0043228 non-membrane-boun…	GO:0000976 transcription cis-regulatory region binding; GO:0000977 RNA polymerase II transcription regulatory region sequence-specific DNA binding; GO:0000978 RNA polymerase II cis-regulatory region sequence-specific DNA binding; GO:0000981 DNA-binding transcription factor activity, RNA polymerase II-specific; GO:0000987 cis-regulatory region sequence-specific DNA binding; GO:0001067 transcriptio…	PF00010	PF00010 Helix-loop-helix DNA-binding domain		K	KOG3910	Helix loop helix transcription factor
CGIg00921	186	S	0.379382	0.00789321	Q96PH1 NOX5_HUMAN NADPH oxidase 5 OS=Homo sapiens OX=9606 GN=NOX5 PE=1 SV=1	NOX5	_TGS[Phospho (STY)]MTFDDLR_	1	Up	0.34003	0.48479		1.01962	1.22539	1.01616	0.423031	0.490789	0.469653	0.987091	0.929745	0.984223	plasma membrane	K21424	NOX5; NADPH oxidase 5 [EC:1.6.3.-]		GO:0000003 reproduction; GO:0000910 cytokinesis; GO:0001525 angiogenesis; GO:0001568 blood vessel development; GO:0001816 cytokine production; GO:0001935 endothelial cell proliferation; GO:0001944 vasculature development; GO:0002790 peptide secretion; GO:0006801 superoxide metabolic process; GO:0006810 transport; GO:0006811 monoatomic ion transport; GO:0006812 monoatomic cation transport; GO:0006…	GO:0005622 intracellular anatomical structure; GO:0005737 cytoplasm; GO:0005783 endoplasmic reticulum; GO:0005789 endoplasmic reticulum membrane; GO:0012505 endomembrane system; GO:0016020 membrane; GO:0031984 organelle subcompartment; GO:0042175 nuclear outer membrane-endoplasmic reticulum membrane network; GO:0043226 organelle; GO:0043227 membrane-bounded organelle; GO:0043229 intracellular org…	GO:0000166 nucleotide binding; GO:0003824 catalytic activity; GO:0005215 transporter activity; GO:0005216 monoatomic ion channel activity; GO:0005261 monoatomic cation channel activity; GO:0005488 binding; GO:0008324 monoatomic cation transmembrane transporter activity; GO:0015075 monoatomic ion transmembrane transporter activity; GO:0015078 proton transmembrane transporter activity; GO:0015252 p…	PF08022; PF08030	PF08022 FAD-binding domain; PF08030 Ferric reductase NAD binding domain		PQ	KOG0039	Ferric reductase, NADH/NADPH oxidase and related proteins
CGIg01095	271	S	0.451145	0.0233494	XP_034320008.1 uncharacterized protein LOC105346824 [Crassostrea gigas]	--	_SSS[Phospho (STY)]DC[Carbamidomethyl (C)]DLHK_	1	Up	0.718112	0.88022	1.08584	1.33588	2.24836	2.36543	1.05728	1.06154	1.08323	1.17795	0.780157	1.14639	nucleus										Q	KOG0054	Multidrug resistance-associated protein/mitoxantrone resistance protein, ABC superfamily
CGIg01095	736	S	0.385805	0.00206276	XP_034320008.1 uncharacterized protein LOC105346824 [Crassostrea gigas]	--	_TGSLERPDKGS[Phospho (STY)]LER_	0.999999	Up	0.780078	0.936439	0.893026	1.80988	2.74607	2.20793	0.701318	0.749779	0.665506	0.931991	1.42872	1.64347	nucleus										Q	KOG0054	Multidrug resistance-associated protein/mitoxantrone resistance protein, ABC superfamily
CGIg01095	750	S	0.294983	0.00493896	XP_034320008.1 uncharacterized protein LOC105346824 [Crassostrea gigas]	--	_EDS[Phospho (STY)]PKKDPDNVAVR_	1	Up	1.01005	1.20097	1.43993	2.80432	5.30438	4.26812	0.451013	0.457467	0.719784	0.888441	0.585498	0.823624	nucleus										Q	KOG0054	Multidrug resistance-associated protein/mitoxantrone resistance protein, ABC superfamily
CGIg01095	70	S	0.248476	0.00477466	XP_034320008.1 uncharacterized protein LOC105346824 [Crassostrea gigas]	--	_NAS[Phospho (STY)]LILSELEGR_	1	Up	0.745111	0.688315	0.785036	1.79471	3.89924	3.23434	0.623127	0.627121	0.842985	1.77933	1.38193	1.80106	nucleus										Q	KOG0054	Multidrug resistance-associated protein/mitoxantrone resistance protein, ABC superfamily
CGIg01095	746	S	0.197361	0.0152888	XP_034320008.1 uncharacterized protein LOC105346824 [Crassostrea gigas]	--	_ALS[Phospho (STY)]REDSPK_	0.999988	Up	0.519813	0.483072	0.323583	1.50759		2.97309	0.264053		0.382095	1.35001	0.974633		nucleus										Q	KOG0054	Multidrug resistance-associated protein/mitoxantrone resistance protein, ABC superfamily
CGIg01468	1632	S	0.527214	0.0115337	Q9Y4A5 TRRAP_HUMAN Transformation/transcription domain-associated protein OS=Homo sapiens OX=9606 GN=TRRAP PE=1 SV=3	TRRAP	_LFEFILTHS[Phospho (STY)]DGKK_	0.989097	Up	0.763085	0.727906	0.749655	1.28637	1.14293	1.82068	0.815364	0.988931	1.06467	1.02477	0.845565	0.958849	cytoplasm	K08874	TRRAP; transformation/transcription domain-associated protein		GO:0000003 reproduction; GO:0000075 cell cycle checkpoint signaling; GO:0000278 mitotic cell cycle; GO:0006139 nucleobase-containing compound metabolic process; GO:0006259 DNA metabolic process; GO:0006281 DNA repair; GO:0006325 chromatin organization; GO:0006355 regulation of DNA-templated transcription; GO:0006473 protein acetylation; GO:0006475 internal protein amino acid acetylation; GO:00065…	GO:0000123 histone acetyltransferase complex; GO:0000228 nuclear chromosome; GO:0000428 DNA-directed RNA polymerase complex; GO:0000785 chromatin; GO:0000793 condensed chromosome; GO:0000812 Swr1 complex; GO:0005622 intracellular anatomical structure; GO:0005634 nucleus; GO:0005654 nucleoplasm; GO:0005667 transcription regulator complex; GO:0005694 chromosome; GO:0005737 cytoplasm; GO:0005794 Gol…	GO:0003682 chromatin binding; GO:0003712 transcription coregulator activity; GO:0003713 transcription coactivator activity; GO:0003824 catalytic activity; GO:0005488 binding; GO:0008233 peptidase activity; GO:0008234 cysteine-type peptidase activity; GO:0016301 kinase activity; GO:0016740 transferase activity; GO:0016772 transferase activity, transferring phosphorus-containing groups; GO:0016787 …				TBLD	KOG0889	Histone acetyltransferase SAGA, TRRAP/TRA1 component, PI-3 kinase superfamily
CGIg01468	534	T	0.445558	5.05796e-05	Q9Y4A5 TRRAP_HUMAN Transformation/transcription domain-associated protein OS=Homo sapiens OX=9606 GN=TRRAP PE=1 SV=3	TRRAP	_T[Phospho (STY)]PTVEESKPPMTSSSSLLGDTATK_	0.999961	Up	0.535467	0.528731	0.477015	1.20917	1.12351	1.12638	0.630074	0.589124	0.585256	0.888747	1.067	0.85041	cytoplasm	K08874	TRRAP; transformation/transcription domain-associated protein		GO:0000003 reproduction; GO:0000075 cell cycle checkpoint signaling; GO:0000278 mitotic cell cycle; GO:0006139 nucleobase-containing compound metabolic process; GO:0006259 DNA metabolic process; GO:0006281 DNA repair; GO:0006325 chromatin organization; GO:0006355 regulation of DNA-templated transcription; GO:0006473 protein acetylation; GO:0006475 internal protein amino acid acetylation; GO:00065…	GO:0000123 histone acetyltransferase complex; GO:0000228 nuclear chromosome; GO:0000428 DNA-directed RNA polymerase complex; GO:0000785 chromatin; GO:0000793 condensed chromosome; GO:0000812 Swr1 complex; GO:0005622 intracellular anatomical structure; GO:0005634 nucleus; GO:0005654 nucleoplasm; GO:0005667 transcription regulator complex; GO:0005694 chromosome; GO:0005737 cytoplasm; GO:0005794 Gol…	GO:0003682 chromatin binding; GO:0003712 transcription coregulator activity; GO:0003713 transcription coactivator activity; GO:0003824 catalytic activity; GO:0005488 binding; GO:0008233 peptidase activity; GO:0008234 cysteine-type peptidase activity; GO:0016301 kinase activity; GO:0016740 transferase activity; GO:0016772 transferase activity, transferring phosphorus-containing groups; GO:0016787 …				TBLD	KOG0889	Histone acetyltransferase SAGA, TRRAP/TRA1 component, PI-3 kinase superfamily
CGIg01501	741	S	0.613996	0.0119784	Q5JTW2 CEP78_HUMAN Centrosomal protein of 78 kDa OS=Homo sapiens OX=9606 GN=CEP78 PE=1 SV=1	CEP78	_KDS[Phospho (STY)]KTDLFSEDHSR_	1	Up	0.608955	0.896959	0.698953	1.23743	1.17792	1.17565	0.658132	0.822012	0.851573	2.94339	1.17085	1.3293	nucleus	K16765	CEP78; centrosomal protein CEP78		GO:0000086 G2/M transition of mitotic cell cycle; GO:0000278 mitotic cell cycle; GO:0006996 organelle organization; GO:0007049 cell cycle; GO:0007346 regulation of mitotic cell cycle; GO:0009987 cellular process; GO:0010389 regulation of G2/M transition of mitotic cell cycle; GO:0010564 regulation of cell cycle process; GO:0016043 cellular component organization; GO:0022402 cell cycle process; GO…	GO:0005622 intracellular anatomical structure; GO:0005737 cytoplasm; GO:0005813 centrosome; GO:0005814 centriole; GO:0005815 microtubule organizing center; GO:0005829 cytosol; GO:0005856 cytoskeleton; GO:0005929 cilium; GO:0015630 microtubule cytoskeleton; GO:0036064 ciliary basal body; GO:0042995 cell projection; GO:0043226 organelle; GO:0043228 non-membrane-bounded organelle; GO:0043229 intrace…					S	KOG4308	LRR-containing protein
CGIg01501	600	S	0.513751	0.00806587	Q5JTW2 CEP78_HUMAN Centrosomal protein of 78 kDa OS=Homo sapiens OX=9606 GN=CEP78 PE=1 SV=1	CEP78	_AS[Phospho (STY)]YFGDISAVGR_	0.999999	Up	0.723136	0.65201	0.690418	1.52157	1.0184	1.48058		0.676999	0.850814	1.47026	1.50377	1.78425	nucleus	K16765	CEP78; centrosomal protein CEP78		GO:0000086 G2/M transition of mitotic cell cycle; GO:0000278 mitotic cell cycle; GO:0006996 organelle organization; GO:0007049 cell cycle; GO:0007346 regulation of mitotic cell cycle; GO:0009987 cellular process; GO:0010389 regulation of G2/M transition of mitotic cell cycle; GO:0010564 regulation of cell cycle process; GO:0016043 cellular component organization; GO:0022402 cell cycle process; GO…	GO:0005622 intracellular anatomical structure; GO:0005737 cytoplasm; GO:0005813 centrosome; GO:0005814 centriole; GO:0005815 microtubule organizing center; GO:0005829 cytosol; GO:0005856 cytoskeleton; GO:0005929 cilium; GO:0015630 microtubule cytoskeleton; GO:0036064 ciliary basal body; GO:0042995 cell projection; GO:0043226 organelle; GO:0043228 non-membrane-bounded organelle; GO:0043229 intrace…					S	KOG4308	LRR-containing protein
CGIg01501	641	S	0.361957	0.000188407	Q5JTW2 CEP78_HUMAN Centrosomal protein of 78 kDa OS=Homo sapiens OX=9606 GN=CEP78 PE=1 SV=1	CEP78	_DFHDGS[Phospho (STY)]FINEEK_	1	Up	0.640946	0.528735	0.551025	1.55057	1.46625	1.73707	0.529513	0.610055	0.661156	2.22128	1.94705	2.08184	nucleus	K16765	CEP78; centrosomal protein CEP78		GO:0000086 G2/M transition of mitotic cell cycle; GO:0000278 mitotic cell cycle; GO:0006996 organelle organization; GO:0007049 cell cycle; GO:0007346 regulation of mitotic cell cycle; GO:0009987 cellular process; GO:0010389 regulation of G2/M transition of mitotic cell cycle; GO:0010564 regulation of cell cycle process; GO:0016043 cellular component organization; GO:0022402 cell cycle process; GO…	GO:0005622 intracellular anatomical structure; GO:0005737 cytoplasm; GO:0005813 centrosome; GO:0005814 centriole; GO:0005815 microtubule organizing center; GO:0005829 cytosol; GO:0005856 cytoskeleton; GO:0005929 cilium; GO:0015630 microtubule cytoskeleton; GO:0036064 ciliary basal body; GO:0042995 cell projection; GO:0043226 organelle; GO:0043228 non-membrane-bounded organelle; GO:0043229 intrace…					S	KOG4308	LRR-containing protein
CGIg01501	623	S	0.072808	1.26552e-05	Q5JTW2 CEP78_HUMAN Centrosomal protein of 78 kDa OS=Homo sapiens OX=9606 GN=CEP78 PE=1 SV=1	CEP78	_GGDS[Phospho (STY)]DANLSAFDK_	1	Up	0.134436	0.182658	0.180716	2.27972	2.27163	2.28595	0.236929	0.202654	0.276572	2.54341	2.57038	2.46193	nucleus	K16765	CEP78; centrosomal protein CEP78		GO:0000086 G2/M transition of mitotic cell cycle; GO:0000278 mitotic cell cycle; GO:0006996 organelle organization; GO:0007049 cell cycle; GO:0007346 regulation of mitotic cell cycle; GO:0009987 cellular process; GO:0010389 regulation of G2/M transition of mitotic cell cycle; GO:0010564 regulation of cell cycle process; GO:0016043 cellular component organization; GO:0022402 cell cycle process; GO…	GO:0005622 intracellular anatomical structure; GO:0005737 cytoplasm; GO:0005813 centrosome; GO:0005814 centriole; GO:0005815 microtubule organizing center; GO:0005829 cytosol; GO:0005856 cytoskeleton; GO:0005929 cilium; GO:0015630 microtubule cytoskeleton; GO:0036064 ciliary basal body; GO:0042995 cell projection; GO:0043226 organelle; GO:0043228 non-membrane-bounded organelle; GO:0043229 intrace…					S	KOG4308	LRR-containing protein
CGIg01532	562	S	0.530187	0.00421358	Q6A098 SBP2L_MOUSE Selenocysteine insertion sequence-binding protein 2-like OS=Mus musculus OX=10090 GN=Secisbp2l PE=1 SV=2	Secisbp2l	_TVS[Phospho (STY)]PQPGILK_	0.999999	Up	0.617729	0.715073	0.512883	1.25993	1.05351	1.16776	0.548899		0.253929	1.41859	1.88414	2.16379	nucleus				GO:0001514 selenocysteine incorporation; GO:0006412 translation; GO:0006414 translational elongation; GO:0006417 regulation of translation; GO:0006451 translational readthrough; GO:0006518 peptide metabolic process; GO:0006807 nitrogen compound metabolic process; GO:0008152 metabolic process; GO:0009058 biosynthetic process; GO:0009059 macromolecule biosynthetic process; GO:0009889 regulation of …	GO:0032991 protein-containing complex; GO:1990904 ribonucleoprotein complex;	GO:0003676 nucleic acid binding; GO:0003723 RNA binding; GO:0003729 mRNA binding; GO:0003730 mRNA 3'-UTR binding; GO:0005488 binding; GO:0035368 selenocysteine insertion sequence binding; GO:0035613 RNA stem-loop binding; GO:0043021 ribonucleoprotein complex binding; GO:0044877 protein-containing complex binding; GO:0097159 organic cyclic compound binding; GO:1901363 heterocyclic compound binding;	PF01248	PF01248 Ribosomal protein L7Ae/L30e/S12e/Gadd45 family
CGIg01532	548	S	0.510279	0.00460747	Q6A098 SBP2L_MOUSE Selenocysteine insertion sequence-binding protein 2-like OS=Mus musculus OX=10090 GN=Secisbp2l PE=1 SV=2	Secisbp2l	_GQPAPARPS[Phospho (STY)]PVIQPR_	1	Up	0.482945	0.618708	0.493241	1.18041	0.878863	1.06626	0.577132		0.662868	1.27169	1.78084	1.82863	nucleus				GO:0001514 selenocysteine incorporation; GO:0006412 translation; GO:0006414 translational elongation; GO:0006417 regulation of translation; GO:0006451 translational readthrough; GO:0006518 peptide metabolic process; GO:0006807 nitrogen compound metabolic process; GO:0008152 metabolic process; GO:0009058 biosynthetic process; GO:0009059 macromolecule biosynthetic process; GO:0009889 regulation of …	GO:0032991 protein-containing complex; GO:1990904 ribonucleoprotein complex;	GO:0003676 nucleic acid binding; GO:0003723 RNA binding; GO:0003729 mRNA binding; GO:0003730 mRNA 3'-UTR binding; GO:0005488 binding; GO:0035368 selenocysteine insertion sequence binding; GO:0035613 RNA stem-loop binding; GO:0043021 ribonucleoprotein complex binding; GO:0044877 protein-containing complex binding; GO:0097159 organic cyclic compound binding; GO:1901363 heterocyclic compound binding;	PF01248	PF01248 Ribosomal protein L7Ae/L30e/S12e/Gadd45 family
CGIg01555	258	S	0.388526	0.0349715	P14316 IRF2_HUMAN Interferon regulatory factor 2 OS=Homo sapiens OX=9606 GN=IRF2 PE=1 SV=2	IRF2	_KVGS[Phospho (STY)]TPST[Phospho (STY)]PVGAK_	0.999915	Up	0.791591	0.305472	0.315482	0.972616	1.24899	1.41405	0.445334	0.371428	0.64938	1.50488	1.51122	0.722374	nucleus	K10153	IRF2; interferon regulatory factor 2		GO:0000122 negative regulation of transcription by RNA polymerase II; GO:0002252 immune effector process; GO:0002376 immune system process; GO:0006139 nucleobase-containing compound metabolic process; GO:0006351 DNA-templated transcription; GO:0006355 regulation of DNA-templated transcription; GO:0006357 regulation of transcription by RNA polymerase II; GO:0006366 transcription by RNA polymerase …	GO:0005622 intracellular anatomical structure; GO:0005634 nucleus; GO:0005654 nucleoplasm; GO:0005737 cytoplasm; GO:0005829 cytosol; GO:0005912 adherens junction; GO:0005925 focal adhesion; GO:0030054 cell junction; GO:0030055 cell-substrate junction; GO:0031974 membrane-enclosed lumen; GO:0031981 nuclear lumen; GO:0043226 organelle; GO:0043227 membrane-bounded organelle; GO:0043229 intracellular…	GO:0000976 transcription cis-regulatory region binding; GO:0000977 RNA polymerase II transcription regulatory region sequence-specific DNA binding; GO:0000981 DNA-binding transcription factor activity, RNA polymerase II-specific; GO:0001067 transcription regulatory region nucleic acid binding; GO:0001228 DNA-binding transcription activator activity, RNA polymerase II-specific; GO:0003676 nucleic …	PF00605	PF00605 Interferon regulatory factor transcription factor
CGIg01555	705	S	0.360936	0.0141122	P14316 IRF2_HUMAN Interferon regulatory factor 2 OS=Homo sapiens OX=9606 GN=IRF2 PE=1 SV=2	IRF2	_FPSS[Phospho (STY)]PLVITNR_	0.999776	Up		0.368406	0.35349	1.01102	0.744481	1.2446				0.672442	0.697317		nucleus	K10153	IRF2; interferon regulatory factor 2		GO:0000122 negative regulation of transcription by RNA polymerase II; GO:0002252 immune effector process; GO:0002376 immune system process; GO:0006139 nucleobase-containing compound metabolic process; GO:0006351 DNA-templated transcription; GO:0006355 regulation of DNA-templated transcription; GO:0006357 regulation of transcription by RNA polymerase II; GO:0006366 transcription by RNA polymerase …	GO:0005622 intracellular anatomical structure; GO:0005634 nucleus; GO:0005654 nucleoplasm; GO:0005737 cytoplasm; GO:0005829 cytosol; GO:0005912 adherens junction; GO:0005925 focal adhesion; GO:0030054 cell junction; GO:0030055 cell-substrate junction; GO:0031974 membrane-enclosed lumen; GO:0031981 nuclear lumen; GO:0043226 organelle; GO:0043227 membrane-bounded organelle; GO:0043229 intracellular…	GO:0000976 transcription cis-regulatory region binding; GO:0000977 RNA polymerase II transcription regulatory region sequence-specific DNA binding; GO:0000981 DNA-binding transcription factor activity, RNA polymerase II-specific; GO:0001067 transcription regulatory region nucleic acid binding; GO:0001228 DNA-binding transcription activator activity, RNA polymerase II-specific; GO:0003676 nucleic …	PF00605	PF00605 Interferon regulatory factor transcription factor
CGIg01555	262	T	0.058532	0.01214	P14316 IRF2_HUMAN Interferon regulatory factor 2 OS=Homo sapiens OX=9606 GN=IRF2 PE=1 SV=2	IRF2	_KVGSTPST[Phospho (STY)]PVGAK_	1	Up		0.0986076	0.0324616	0.671734	1.66717	1.02001			0.206988	1.04294	1.08268	0.892194	nucleus	K10153	IRF2; interferon regulatory factor 2		GO:0000122 negative regulation of transcription by RNA polymerase II; GO:0002252 immune effector process; GO:0002376 immune system process; GO:0006139 nucleobase-containing compound metabolic process; GO:0006351 DNA-templated transcription; GO:0006355 regulation of DNA-templated transcription; GO:0006357 regulation of transcription by RNA polymerase II; GO:0006366 transcription by RNA polymerase …	GO:0005622 intracellular anatomical structure; GO:0005634 nucleus; GO:0005654 nucleoplasm; GO:0005737 cytoplasm; GO:0005829 cytosol; GO:0005912 adherens junction; GO:0005925 focal adhesion; GO:0030054 cell junction; GO:0030055 cell-substrate junction; GO:0031974 membrane-enclosed lumen; GO:0031981 nuclear lumen; GO:0043226 organelle; GO:0043227 membrane-bounded organelle; GO:0043229 intracellular…	GO:0000976 transcription cis-regulatory region binding; GO:0000977 RNA polymerase II transcription regulatory region sequence-specific DNA binding; GO:0000981 DNA-binding transcription factor activity, RNA polymerase II-specific; GO:0001067 transcription regulatory region nucleic acid binding; GO:0001228 DNA-binding transcription activator activity, RNA polymerase II-specific; GO:0003676 nucleic …	PF00605	PF00605 Interferon regulatory factor transcription factor
CGIg01576	78	S	0.24892	3.30947e-05	Q71UM5 RS27L_HUMAN 40S ribosomal protein S27-like OS=Homo sapiens OX=9606 GN=RPS27L PE=1 SV=3	RPS27L	_LTEGC[Carbamidomethyl (C)]S[Phospho (STY)]FR_	1	Up	0.313661	0.287555	0.260724	1.06538	1.22787	1.16946	0.213554	0.210789	0.219432	1.17734	0.119682	1.15279	extracellular	K02978	RP-S27e, RPS27; small subunit ribosomal protein S27e	map03010 Ribosome	GO:0000028 ribosomal small subunit assembly; GO:0002181 cytoplasmic translation; GO:0006412 translation; GO:0006518 peptide metabolic process; GO:0006807 nitrogen compound metabolic process; GO:0006996 organelle organization; GO:0008152 metabolic process; GO:0009058 biosynthetic process; GO:0009059 macromolecule biosynthetic process; GO:0009987 cellular process; GO:0010467 gene expression; GO:001…	GO:0005622 intracellular anatomical structure; GO:0005737 cytoplasm; GO:0005829 cytosol; GO:0005840 ribosome; GO:0015935 small ribosomal subunit; GO:0022626 cytosolic ribosome; GO:0022627 cytosolic small ribosomal subunit; GO:0032991 protein-containing complex; GO:0043226 organelle; GO:0043228 non-membrane-bounded organelle; GO:0043229 intracellular organelle; GO:0043232 intracellular non-membran…	GO:0003735 structural constituent of ribosome; GO:0005198 structural molecule activity;				J	KOG1779	40s ribosomal protein S27
CGIg01592	124	S	0.417606	0.00173126	Q80U87 UBP8_MOUSE Ubiquitin carboxyl-terminal hydrolase 8 OS=Mus musculus OX=10090 GN=Usp8 PE=1 SV=2	Usp8	_DRYELAEAEEVASKLS[Phospho (STY)]PLEDK_	1	Up	0.36505	0.413297	0.426312	1.01906	1.09295	0.772668		0.29809	0.354225	0.630856	1.01214	0.887616	nucleus	K11839	USP8, UBP5; ubiquitin carboxyl-terminal hydrolase 8 [EC:3.4.19.12]	map04137 Mitophagy - animal; map04144 Endocytosis	GO:0000278 mitotic cell cycle; GO:0000281 mitotic cytokinesis; GO:0000910 cytokinesis; GO:0002009 morphogenesis of an epithelium; GO:0002165 instar larval or pupal development; GO:0006508 proteolysis; GO:0006807 nitrogen compound metabolic process; GO:0006996 organelle organization; GO:0007032 endosome organization; GO:0007049 cell cycle; GO:0007154 cell communication; GO:0007165 signal transduct…	GO:0005622 intracellular anatomical structure; GO:0005737 cytoplasm; GO:0005768 endosome; GO:0005769 early endosome; GO:0005829 cytosol; GO:0005886 plasma membrane; GO:0010008 endosome membrane; GO:0012505 endomembrane system; GO:0014069 postsynaptic density; GO:0016020 membrane; GO:0019897 extrinsic component of plasma membrane; GO:0019898 extrinsic component of membrane; GO:0030425 dendrite; GO…	GO:0003824 catalytic activity; GO:0004175 endopeptidase activity; GO:0004197 cysteine-type endopeptidase activity; GO:0004843 cysteine-type deubiquitinase activity; GO:0008233 peptidase activity; GO:0008234 cysteine-type peptidase activity; GO:0016787 hydrolase activity; GO:0019783 ubiquitin-like protein peptidase activity; GO:0101005 deubiquitinase activity; GO:0140096 catalytic activity, acting…	PF08969; PF00581; PF00397	PF08969 USP8 dimerisation domain; PF00581 Rhodanese-like domain; PF00397 WW domain		O	KOG1868	Ubiquitin C-terminal hydrolase
CGIg01592	397	S	0.27747	0.00565904	Q80U87 UBP8_MOUSE Ubiquitin carboxyl-terminal hydrolase 8 OS=Mus musculus OX=10090 GN=Usp8 PE=1 SV=2	Usp8	_NAS[Phospho (STY)]MNSLTEAK_	1	Up	0.342036	0.612265	0.466873	1.6091	2.24854	1.26425	0.520194	0.382269	0.473944	1.98846	2.0207	2.04986	nucleus	K11839	USP8, UBP5; ubiquitin carboxyl-terminal hydrolase 8 [EC:3.4.19.12]	map04137 Mitophagy - animal; map04144 Endocytosis	GO:0000278 mitotic cell cycle; GO:0000281 mitotic cytokinesis; GO:0000910 cytokinesis; GO:0002009 morphogenesis of an epithelium; GO:0002165 instar larval or pupal development; GO:0006508 proteolysis; GO:0006807 nitrogen compound metabolic process; GO:0006996 organelle organization; GO:0007032 endosome organization; GO:0007049 cell cycle; GO:0007154 cell communication; GO:0007165 signal transduct…	GO:0005622 intracellular anatomical structure; GO:0005737 cytoplasm; GO:0005768 endosome; GO:0005769 early endosome; GO:0005829 cytosol; GO:0005886 plasma membrane; GO:0010008 endosome membrane; GO:0012505 endomembrane system; GO:0014069 postsynaptic density; GO:0016020 membrane; GO:0019897 extrinsic component of plasma membrane; GO:0019898 extrinsic component of membrane; GO:0030425 dendrite; GO…	GO:0003824 catalytic activity; GO:0004175 endopeptidase activity; GO:0004197 cysteine-type endopeptidase activity; GO:0004843 cysteine-type deubiquitinase activity; GO:0008233 peptidase activity; GO:0008234 cysteine-type peptidase activity; GO:0016787 hydrolase activity; GO:0019783 ubiquitin-like protein peptidase activity; GO:0101005 deubiquitinase activity; GO:0140096 catalytic activity, acting…	PF08969; PF00581; PF00397	PF08969 USP8 dimerisation domain; PF00581 Rhodanese-like domain; PF00397 WW domain		O	KOG1868	Ubiquitin C-terminal hydrolase
CGIg01643	797	S	0.415078	0.00204513	Q9UPM8 AP4E1_HUMAN AP-4 complex subunit epsilon-1 OS=Homo sapiens OX=9606 GN=AP4E1 PE=1 SV=2	AP4E1	_KGS[Phospho (STY)]SPEEMDR_	0.993553	Up	0.440593	0.406769		0.951376	1.1527	0.958097	0.596712	0.762167	0.663057	1.30224	0.788592	1.04878	nucleus	K12400	AP4E1; AP-4 complex subunit epsilon-1	map04142 Lysosome	GO:0006605 protein targeting; GO:0006810 transport; GO:0006886 intracellular protein transport; GO:0008104 protein localization; GO:0015031 protein transport; GO:0015833 peptide transport; GO:0016192 vesicle-mediated transport; GO:0033036 macromolecule localization; GO:0042886 amide transport; GO:0045184 establishment of protein localization; GO:0046907 intracellular transport; GO:0051179 localiz…	GO:0000139 Golgi membrane; GO:0005622 intracellular anatomical structure; GO:0005737 cytoplasm; GO:0005768 endosome; GO:0005794 Golgi apparatus; GO:0005802 trans-Golgi network; GO:0012505 endomembrane system; GO:0016020 membrane; GO:0030117 membrane coat; GO:0030119 AP-type membrane coat adaptor complex; GO:0030124 AP-4 adaptor complex; GO:0031090 organelle membrane; GO:0031410 cytoplasmic vesicl…					U	KOG1062	Vesicle coat complex AP-1, gamma subunit
CGIg01668	886	Y	0.608499	0.0453152	P39447 ZO1_MOUSE Tight junction protein ZO-1 OS=Mus musculus OX=10090 GN=Tjp1 PE=1 SV=2	Tjp1	_YVDFDRQSEDRYYPSYY[Phospho (STY)]ASESLPHGQFPHTR_	0.903677	Up	0.78023		0.68515	1.30172	1.10646						1.56831		nucleus	K05701	TJP1, ZO1; tight junction protein 1	map04520 Adherens junction; map04530 Tight junction; map04540 Gap junction	GO:0000165 MAPK cascade; GO:0001654 eye development; GO:0001700 embryonic development via the syncytial blastoderm; GO:0001701 in utero embryonic development; GO:0001708 cell fate specification; GO:0001745 compound eye morphogenesis; GO:0001763 morphogenesis of a branching structure; GO:0001824 blastocyst development; GO:0001825 blastocyst formation; GO:0001885 endothelial cell development; GO:00…	GO:0005622 intracellular anatomical structure; GO:0005634 nucleus; GO:0005654 nucleoplasm; GO:0005737 cytoplasm; GO:0005829 cytosol; GO:0005886 plasma membrane; GO:0005911 cell-cell junction; GO:0005912 adherens junction; GO:0005917 nephrocyte diaphragm; GO:0005921 gap junction; GO:0005923 bicellular tight junction; GO:0005938 cell cortex; GO:0009986 cell surface; GO:0014704 intercalated disc; GO…	GO:0003824 catalytic activity; GO:0004385 guanylate kinase activity; GO:0005488 binding; GO:0005515 protein binding; GO:0016301 kinase activity; GO:0016740 transferase activity; GO:0016772 transferase activity, transferring phosphorus-containing groups; GO:0016776 phosphotransferase activity, phosphate group as acceptor; GO:0019205 nucleobase-containing compound kinase activity; GO:0019899 enzyme…	PF00595; PF07653; PF00625	PF00595 PDZ domain; PF07653 Variant SH3 domain; PF00625 Guanylate kinase		T	KOG3580	Tight junction proteins
CGIg01668	877	S	0.471963	0.00110168	P39447 ZO1_MOUSE Tight junction protein ZO-1 OS=Mus musculus OX=10090 GN=Tjp1 PE=1 SV=2	Tjp1	_YVDFDRQS[Phospho (STY)]EDR_	1	Up	0.492155	0.467753	0.610198	1.03806	1.10311	1.18559	0.704611	0.659115	0.67386	1.33511	1.58157	1.31219	nucleus	K05701	TJP1, ZO1; tight junction protein 1	map04520 Adherens junction; map04530 Tight junction; map04540 Gap junction	GO:0000165 MAPK cascade; GO:0001654 eye development; GO:0001700 embryonic development via the syncytial blastoderm; GO:0001701 in utero embryonic development; GO:0001708 cell fate specification; GO:0001745 compound eye morphogenesis; GO:0001763 morphogenesis of a branching structure; GO:0001824 blastocyst development; GO:0001825 blastocyst formation; GO:0001885 endothelial cell development; GO:00…	GO:0005622 intracellular anatomical structure; GO:0005634 nucleus; GO:0005654 nucleoplasm; GO:0005737 cytoplasm; GO:0005829 cytosol; GO:0005886 plasma membrane; GO:0005911 cell-cell junction; GO:0005912 adherens junction; GO:0005917 nephrocyte diaphragm; GO:0005921 gap junction; GO:0005923 bicellular tight junction; GO:0005938 cell cortex; GO:0009986 cell surface; GO:0014704 intercalated disc; GO…	GO:0003824 catalytic activity; GO:0004385 guanylate kinase activity; GO:0005488 binding; GO:0005515 protein binding; GO:0016301 kinase activity; GO:0016740 transferase activity; GO:0016772 transferase activity, transferring phosphorus-containing groups; GO:0016776 phosphotransferase activity, phosphate group as acceptor; GO:0019205 nucleobase-containing compound kinase activity; GO:0019899 enzyme…	PF00595; PF07653; PF00625	PF00595 PDZ domain; PF07653 Variant SH3 domain; PF00625 Guanylate kinase		T	KOG3580	Tight junction proteins
CGIg01668	2391	S	0.452668	0.000690021	P39447 ZO1_MOUSE Tight junction protein ZO-1 OS=Mus musculus OX=10090 GN=Tjp1 PE=1 SV=2	Tjp1	_NS[Phospho (STY)]VSVLVDHF_	0.99834	Up	0.499791	0.477853	0.395403	1.06949	1.03682	0.926927	0.476126	0.580545		0.652074	0.652675	0.728088	nucleus	K05701	TJP1, ZO1; tight junction protein 1	map04520 Adherens junction; map04530 Tight junction; map04540 Gap junction	GO:0000165 MAPK cascade; GO:0001654 eye development; GO:0001700 embryonic development via the syncytial blastoderm; GO:0001701 in utero embryonic development; GO:0001708 cell fate specification; GO:0001745 compound eye morphogenesis; GO:0001763 morphogenesis of a branching structure; GO:0001824 blastocyst development; GO:0001825 blastocyst formation; GO:0001885 endothelial cell development; GO:00…	GO:0005622 intracellular anatomical structure; GO:0005634 nucleus; GO:0005654 nucleoplasm; GO:0005737 cytoplasm; GO:0005829 cytosol; GO:0005886 plasma membrane; GO:0005911 cell-cell junction; GO:0005912 adherens junction; GO:0005917 nephrocyte diaphragm; GO:0005921 gap junction; GO:0005923 bicellular tight junction; GO:0005938 cell cortex; GO:0009986 cell surface; GO:0014704 intercalated disc; GO…	GO:0003824 catalytic activity; GO:0004385 guanylate kinase activity; GO:0005488 binding; GO:0005515 protein binding; GO:0016301 kinase activity; GO:0016740 transferase activity; GO:0016772 transferase activity, transferring phosphorus-containing groups; GO:0016776 phosphotransferase activity, phosphate group as acceptor; GO:0019205 nucleobase-containing compound kinase activity; GO:0019899 enzyme…	PF00595; PF07653; PF00625	PF00595 PDZ domain; PF07653 Variant SH3 domain; PF00625 Guanylate kinase		T	KOG3580	Tight junction proteins
CGIg01668	271	S	0.423761	0.0319653	P39447 ZO1_MOUSE Tight junction protein ZO-1 OS=Mus musculus OX=10090 GN=Tjp1 PE=1 SV=2	Tjp1	_SDIDNVNIYRPS[Phospho (STY)]LSSPEEEIYK_	0.999999	Up	0.340401	0.83861	0.419865	1.42331	1.0463	1.30346	0.526627	0.356301	0.850912	1.3825	1.12117	1.29835	nucleus	K05701	TJP1, ZO1; tight junction protein 1	map04520 Adherens junction; map04530 Tight junction; map04540 Gap junction	GO:0000165 MAPK cascade; GO:0001654 eye development; GO:0001700 embryonic development via the syncytial blastoderm; GO:0001701 in utero embryonic development; GO:0001708 cell fate specification; GO:0001745 compound eye morphogenesis; GO:0001763 morphogenesis of a branching structure; GO:0001824 blastocyst development; GO:0001825 blastocyst formation; GO:0001885 endothelial cell development; GO:00…	GO:0005622 intracellular anatomical structure; GO:0005634 nucleus; GO:0005654 nucleoplasm; GO:0005737 cytoplasm; GO:0005829 cytosol; GO:0005886 plasma membrane; GO:0005911 cell-cell junction; GO:0005912 adherens junction; GO:0005917 nephrocyte diaphragm; GO:0005921 gap junction; GO:0005923 bicellular tight junction; GO:0005938 cell cortex; GO:0009986 cell surface; GO:0014704 intercalated disc; GO…	GO:0003824 catalytic activity; GO:0004385 guanylate kinase activity; GO:0005488 binding; GO:0005515 protein binding; GO:0016301 kinase activity; GO:0016740 transferase activity; GO:0016772 transferase activity, transferring phosphorus-containing groups; GO:0016776 phosphotransferase activity, phosphate group as acceptor; GO:0019205 nucleobase-containing compound kinase activity; GO:0019899 enzyme…	PF00595; PF07653; PF00625	PF00595 PDZ domain; PF07653 Variant SH3 domain; PF00625 Guanylate kinase		T	KOG3580	Tight junction proteins
CGIg01668	1554	Y	0.397236	0.00134249	P39447 ZO1_MOUSE Tight junction protein ZO-1 OS=Mus musculus OX=10090 GN=Tjp1 PE=1 SV=2	Tjp1	_MEDSAY[Phospho (STY)]DSEEFSPTGSTGFPTYDR_	1	Up	0.343294	0.322935	0.459503	0.89187	1.02682	0.915223		0.415828	0.773005	1.21476	1.34055	1.20467	nucleus	K05701	TJP1, ZO1; tight junction protein 1	map04520 Adherens junction; map04530 Tight junction; map04540 Gap junction	GO:0000165 MAPK cascade; GO:0001654 eye development; GO:0001700 embryonic development via the syncytial blastoderm; GO:0001701 in utero embryonic development; GO:0001708 cell fate specification; GO:0001745 compound eye morphogenesis; GO:0001763 morphogenesis of a branching structure; GO:0001824 blastocyst development; GO:0001825 blastocyst formation; GO:0001885 endothelial cell development; GO:00…	GO:0005622 intracellular anatomical structure; GO:0005634 nucleus; GO:0005654 nucleoplasm; GO:0005737 cytoplasm; GO:0005829 cytosol; GO:0005886 plasma membrane; GO:0005911 cell-cell junction; GO:0005912 adherens junction; GO:0005917 nephrocyte diaphragm; GO:0005921 gap junction; GO:0005923 bicellular tight junction; GO:0005938 cell cortex; GO:0009986 cell surface; GO:0014704 intercalated disc; GO…	GO:0003824 catalytic activity; GO:0004385 guanylate kinase activity; GO:0005488 binding; GO:0005515 protein binding; GO:0016301 kinase activity; GO:0016740 transferase activity; GO:0016772 transferase activity, transferring phosphorus-containing groups; GO:0016776 phosphotransferase activity, phosphate group as acceptor; GO:0019205 nucleobase-containing compound kinase activity; GO:0019899 enzyme…	PF00595; PF07653; PF00625	PF00595 PDZ domain; PF07653 Variant SH3 domain; PF00625 Guanylate kinase		T	KOG3580	Tight junction proteins
CGIg01668	1022	S	0.0776251	0.011145	P39447 ZO1_MOUSE Tight junction protein ZO-1 OS=Mus musculus OX=10090 GN=Tjp1 PE=1 SV=2	Tjp1	_EKFGS[Phospho (STY)]LAVAAK_	1	Up		0.0754049	0.132653	1.55579	1.79155	0.673101	0.157369	0.0485009	0.131094	2.17584	2.30522	2.23571	nucleus	K05701	TJP1, ZO1; tight junction protein 1	map04520 Adherens junction; map04530 Tight junction; map04540 Gap junction	GO:0000165 MAPK cascade; GO:0001654 eye development; GO:0001700 embryonic development via the syncytial blastoderm; GO:0001701 in utero embryonic development; GO:0001708 cell fate specification; GO:0001745 compound eye morphogenesis; GO:0001763 morphogenesis of a branching structure; GO:0001824 blastocyst development; GO:0001825 blastocyst formation; GO:0001885 endothelial cell development; GO:00…	GO:0005622 intracellular anatomical structure; GO:0005634 nucleus; GO:0005654 nucleoplasm; GO:0005737 cytoplasm; GO:0005829 cytosol; GO:0005886 plasma membrane; GO:0005911 cell-cell junction; GO:0005912 adherens junction; GO:0005917 nephrocyte diaphragm; GO:0005921 gap junction; GO:0005923 bicellular tight junction; GO:0005938 cell cortex; GO:0009986 cell surface; GO:0014704 intercalated disc; GO…	GO:0003824 catalytic activity; GO:0004385 guanylate kinase activity; GO:0005488 binding; GO:0005515 protein binding; GO:0016301 kinase activity; GO:0016740 transferase activity; GO:0016772 transferase activity, transferring phosphorus-containing groups; GO:0016776 phosphotransferase activity, phosphate group as acceptor; GO:0019205 nucleobase-containing compound kinase activity; GO:0019899 enzyme…	PF00595; PF07653; PF00625	PF00595 PDZ domain; PF07653 Variant SH3 domain; PF00625 Guanylate kinase		T	KOG3580	Tight junction proteins
CGIg01745	1308	S	0.584039	0.00197797	Q96ST3 SIN3A_HUMAN Paired amphipathic helix protein Sin3a OS=Homo sapiens OX=9606 GN=SIN3A PE=1 SV=2	SIN3A	_S[Phospho (STY)]EAGEPAEIPK_	1	Up	0.666653	0.748594	0.82924	1.20068	1.26217	1.3802	0.784613	0.81666	0.809047	1.11055	1.15923	1.18431	nucleus	K11644	SIN3A; paired amphipathic helix protein Sin3a	map04919 Thyroid hormone signaling pathway	GO:0000003 reproduction; GO:0000122 negative regulation of transcription by RNA polymerase II; GO:0001667 ameboidal-type cell migration; GO:0001678 intracellular glucose homeostasis; GO:0001701 in utero embryonic development; GO:0001708 cell fate specification; GO:0002119 nematode larval development; GO:0002164 larval development; GO:0002218 activation of innate immune response; GO:0002230 positi…	GO:0000118 histone deacetylase complex; GO:0000228 nuclear chromosome; GO:0000775 chromosome, centromeric region; GO:0000776 kinetochore; GO:0000785 chromatin; GO:0000791 euchromatin; GO:0005622 intracellular anatomical structure; GO:0005634 nucleus; GO:0005654 nucleoplasm; GO:0005667 transcription regulator complex; GO:0005694 chromosome; GO:0005700 polytene chromosome; GO:0017053 transcription …	GO:0000976 transcription cis-regulatory region binding; GO:0001067 transcription regulatory region nucleic acid binding; GO:0003676 nucleic acid binding; GO:0003677 DNA binding; GO:0003682 chromatin binding; GO:0003690 double-stranded DNA binding; GO:0003700 DNA-binding transcription factor activity; GO:0003712 transcription coregulator activity; GO:0003714 transcription corepressor activity; GO:…	PF08295	PF08295 Sin3 family co-repressor		B	KOG4204	Histone deacetylase complex, SIN3 component
CGIg01757	59	S	0.546775	0.00793652	O15975 GNAQ_MIZYE Guanine nucleotide-binding protein G(q) subunit alpha OS=Mizuhopecten yessoensis OX=6573 GN=SCGQA PE=2 SV=1	SCGQA	_IIHGS[Phospho (STY)]GYSDADR_	1	Up	0.576448	0.521994	0.7411	1.14457	0.983433	1.23635	0.631213		0.786744	1.10664	1.12759	0.853922	cytoplasm,nucleus	K04634	GNAQ; guanine nucleotide-binding protein G(q) subunit alpha	map04015 Rap1 signaling pathway; map04020 Calcium signaling pathway; map04022 cGMP-PKG signaling pathway; map04062 Chemokine signaling pathway; map04071 Sphingolipid signaling pathway; map04261 Adrenergic signaling in cardiomyocytes; map04270 Vascular smooth muscle contraction; map04361 Axon regeneration; map04371 Apelin signaling pathway; map04540 Gap junction; map04611 Platelet activation; map0…	GO:0000003 reproduction; GO:0000902 cell morphogenesis; GO:0001501 skeletal system development; GO:0001508 action potential; GO:0001775 cell activation; GO:0001932 regulation of protein phosphorylation; GO:0001933 negative regulation of protein phosphorylation; GO:0001956 positive regulation of neurotransmitter secretion; GO:0002119 nematode larval development; GO:0002164 larval development; GO:0…	GO:0001750 photoreceptor outer segment; GO:0005622 intracellular anatomical structure; GO:0005737 cytoplasm; GO:0005829 cytosol; GO:0005834 heterotrimeric G-protein complex; GO:0005886 plasma membrane; GO:0005901 caveola; GO:0005929 cilium; GO:0009898 cytoplasmic side of plasma membrane; GO:0016020 membrane; GO:0016027 inaD signaling complex; GO:0016028 rhabdomere; GO:0019897 extrinsic component …	GO:0000166 nucleotide binding; GO:0001664 G protein-coupled receptor binding; GO:0001882 nucleoside binding; GO:0001883 purine nucleoside binding; GO:0003824 catalytic activity; GO:0003924 GTPase activity; GO:0005096 GTPase activator activity; GO:0005102 signaling receptor binding; GO:0005488 binding; GO:0005515 protein binding; GO:0005525 GTP binding; GO:0008047 enzyme activator activity; GO:000…	PF00503	PF00503 G-protein alpha subunit	PF00503 G-protein alpha subunit	T	KOG0085	G protein subunit Galphaq/Galphay, small G protein superfamily
CGIg01775	715	T	0.3895	0.0185332	Q5BJR4 PRUN2_RAT Protein prune homolog 2 OS=Rattus norvegicus OX=10116 GN=Prune2 PE=1 SV=1	Prune2	_KMEEDDGEEDVVPFT[Phospho (STY)]PQNSFMESNFDR_	1	Up	0.54238	0.830319	0.39847	1.25311	1.94639	1.34778	0.863267	0.795712	0.755435	1.54485	1.1584	1.25079	cytoplasm	K18449	PRUNE2, BMCC1; prune homolog 2					PF13716	PF13716 Divergent CRAL/TRIO domain		F	KOG3308	Uncharacterized protein of the uridine kinase family
CGIg01775	1460	S	0.106796	2.97423e-06	Q5BJR4 PRUN2_RAT Protein prune homolog 2 OS=Rattus norvegicus OX=10116 GN=Prune2 PE=1 SV=1	Prune2	_KNPSDDMTES[Phospho (STY)]DSK_	1	Up	0.183865	0.206265	0.181144	1.93185	1.74679	1.67057	0.20552	0.21847	0.25627	1.29492	1.25068	1.40634	cytoplasm	K18449	PRUNE2, BMCC1; prune homolog 2					PF13716	PF13716 Divergent CRAL/TRIO domain		F	KOG3308	Uncharacterized protein of the uridine kinase family
CGIg01775	1572	S	0.10377	0.0459433	Q5BJR4 PRUN2_RAT Protein prune homolog 2 OS=Rattus norvegicus OX=10116 GN=Prune2 PE=1 SV=1	Prune2	_QTDPLPEFS[Phospho (STY)]AR_	1	Up	0.132925	0.19373		1.49178	1.67486	1.55516	0.229404	0.161023	0.166854	1.6834	1.80041	1.80958	cytoplasm	K18449	PRUNE2, BMCC1; prune homolog 2					PF13716	PF13716 Divergent CRAL/TRIO domain		F	KOG3308	Uncharacterized protein of the uridine kinase family
CGIg02278	253	T	0.485743	0.00014712	XP_034320490.1 uncharacterized protein LOC105338241 [Crassostrea gigas]	--	_KNPDDAAT[Phospho (STY)]PVR_	1	Up	0.659764	0.740494	0.666215	1.51708	1.38952	1.34765	1.22875	1.18835	1.30822	1.09818	1.18726	1.4097	nucleus	K09228	KRAB; KRAB domain-containing zinc finger protein					PF00096	PF00096 Zinc finger, C2H2 type		R	KOG1721	FOG: Zn-finger
CGIg02332	2343	S	0.647411	0.00313789	Q498G2 CE152_XENLA Centrosomal protein of 152 kDa OS=Xenopus laevis OX=8355 GN=cep152 PE=2 SV=1	cep152	_VITSS[Phospho (STY)]PLNNSALYK_	1	Up	0.992634	0.889843	0.910295	1.53475	1.50568	1.27333	0.697659	0.699056	0.611676	1.30423	1.46276	1.1378	nucleus	K16728	CEP152, ASL; centrosomal protein CEP152		GO:0000003 reproduction; GO:0000086 G2/M transition of mitotic cell cycle; GO:0000226 microtubule cytoskeleton organization; GO:0000278 mitotic cell cycle; GO:0001578 microtubule bundle formation; GO:0003006 developmental process involved in reproduction; GO:0006996 organelle organization; GO:0007010 cytoskeleton organization; GO:0007017 microtubule-based process; GO:0007049 cell cycle; GO:000709…	GO:0000242 pericentriolar material; GO:0005622 intracellular anatomical structure; GO:0005634 nucleus; GO:0005654 nucleoplasm; GO:0005737 cytoplasm; GO:0005813 centrosome; GO:0005814 centriole; GO:0005815 microtubule organizing center; GO:0005829 cytosol; GO:0005856 cytoskeleton; GO:0005929 cilium; GO:0015630 microtubule cytoskeleton; GO:0031974 membrane-enclosed lumen; GO:0031981 nuclear lumen; …	GO:0005488 binding; GO:0005515 protein binding; GO:0019899 enzyme binding; GO:0019900 kinase binding; GO:0019901 protein kinase binding;
CGIg02332	2371	S	0.567319	0.0319353	Q498G2 CE152_XENLA Centrosomal protein of 152 kDa OS=Xenopus laevis OX=8355 GN=cep152 PE=2 SV=1	cep152	_NSSLGGS[Phospho (STY)]YK_	0.999997	Up	0.781855	0.544246	1.0049	1.37463	1.25468	1.47949	0.972062	1.56778	1.16524	1.17519	1.33606	1.10527	nucleus	K16728	CEP152, ASL; centrosomal protein CEP152		GO:0000003 reproduction; GO:0000086 G2/M transition of mitotic cell cycle; GO:0000226 microtubule cytoskeleton organization; GO:0000278 mitotic cell cycle; GO:0001578 microtubule bundle formation; GO:0003006 developmental process involved in reproduction; GO:0006996 organelle organization; GO:0007010 cytoskeleton organization; GO:0007017 microtubule-based process; GO:0007049 cell cycle; GO:000709…	GO:0000242 pericentriolar material; GO:0005622 intracellular anatomical structure; GO:0005634 nucleus; GO:0005654 nucleoplasm; GO:0005737 cytoplasm; GO:0005813 centrosome; GO:0005814 centriole; GO:0005815 microtubule organizing center; GO:0005829 cytosol; GO:0005856 cytoskeleton; GO:0005929 cilium; GO:0015630 microtubule cytoskeleton; GO:0031974 membrane-enclosed lumen; GO:0031981 nuclear lumen; …	GO:0005488 binding; GO:0005515 protein binding; GO:0019899 enzyme binding; GO:0019900 kinase binding; GO:0019901 protein kinase binding;
CGIg02362	17	S	0.445381	0.0107737	O57579 AMPN_CHICK Aminopeptidase Ey OS=Gallus gallus OX=9031 GN=ANPEP PE=1 SV=2	ANPEP	_YNS[Phospho (STY)]EAELTPGSGK_	1	Up	0.844151	0.617404	0.85534	1.96874	1.95323	1.28008	0.498081	0.446063	1.30098	1.80832	1.8564	1.96454	plasma membrane	K11140	ANPEP, CD13; aminopeptidase N [EC:3.4.11.2]	map00480 Glutathione metabolism; map01100 Metabolic pathways; map04614 Renin-angiotensin system; map04640 Hematopoietic cell lineage	GO:0001775 cell activation; GO:0002252 immune effector process; GO:0002263 cell activation involved in immune response; GO:0002274 myeloid leukocyte activation; GO:0002275 myeloid cell activation involved in immune response; GO:0002283 neutrophil activation involved in immune response; GO:0002366 leukocyte activation involved in immune response; GO:0002376 immune system process; GO:0002443 leukoc…	GO:0005576 extracellular region; GO:0005615 extracellular space; GO:0005622 intracellular anatomical structure; GO:0005737 cytoplasm; GO:0005793 endoplasmic reticulum-Golgi intermediate compartment; GO:0005886 plasma membrane; GO:0009897 external side of plasma membrane; GO:0009986 cell surface; GO:0012505 endomembrane system; GO:0012506 vesicle membrane; GO:0016020 membrane; GO:0030141 secretory…	GO:0003824 catalytic activity; GO:0004177 aminopeptidase activity; GO:0005488 binding; GO:0008233 peptidase activity; GO:0008235 metalloexopeptidase activity; GO:0008237 metallopeptidase activity; GO:0008238 exopeptidase activity; GO:0008270 zinc ion binding; GO:0016787 hydrolase activity; GO:0033218 amide binding; GO:0038023 signaling receptor activity; GO:0042277 peptide binding; GO:0043167 ion…	PF17900; PF01433; PF11838	PF17900 Peptidase M1 N-terminal domain; PF01433 Peptidase family M1 domain; PF11838 ERAP1-like C-terminal domain		EO	KOG1046	Puromycin-sensitive aminopeptidase and related aminopeptidases
CGIg02364	439	S	0.315416	0.00836977	XP_011453614.2 uncharacterized protein LOC105346636 isoform X1 [Crassostrea gigas]	--	_DMEISGKEES[Phospho (STY)]DNKPIPGSENK_	0.999957	Up	0.343335	0.351194	0.537966		1.28035	1.32466	1.60695	1.80522	1.52462		0.96535		extracellular
CGIg02364	363	S	0.219017	0.000474741	XP_011453614.2 uncharacterized protein LOC105346636 isoform X1 [Crassostrea gigas]	--	_SEHASDT[Phospho (STY)]DS[Phospho (STY)]EEGNS[Phospho (STY)]EPDEKDEK_	1	Up	0.487768	0.646657	0.539208	2.63541	2.00485	3.00129	1.6081	1.11344	0.566341	1.96454	0.315732	0.492675	extracellular
CGIg02364	358	S	0.168899	0.00145627	XP_011453614.2 uncharacterized protein LOC105346636 isoform X1 [Crassostrea gigas]	--	_SEHASDT[Phospho (STY)]DS[Phospho (STY)]EEGNS[Phospho (STY)]EPDEKDEK_	1	Up	0.425019	0.557542	0.482722	3.26061	1.83331	3.58157	1.32516	0.70033	0.598875	0.802383	0.60516	0.913515	extracellular
CGIg02364	285	S	0.0780308	0.002428	XP_011453614.2 uncharacterized protein LOC105346636 isoform X1 [Crassostrea gigas]	--	_ALDFENLNDAS[Phospho (STY)]SPGEFLM[Oxidation (M)]DK_	0.999952	Up	0.159359		0.243129	2.86207	1.80553	3.06949	0.894428	1.28814	0.999703	0.802029	1.05947	0.808515	extracellular
CGIg02441	292	S	0.496724	0.000975854	XP_034321460.1 rootletin isoform X17 [Crassostrea gigas]	--	_KIS[Phospho (STY)]QPLPK_	1	Up	0.552666	0.478391	0.629399	1.15538	1.10189	1.08554	0.439353	0.567794	0.454405	0.977941	1.48911	1.49326	nucleus
CGIg02441	1770	S	0.313027	0.000610111	XP_034321460.1 rootletin isoform X17 [Crassostrea gigas]	--	_VRLS[Phospho (STY)]DSEMSTR_	1	Up	0.358714	0.389312	0.496515	1.1918	1.2819	1.50212	0.584948	0.452481	0.557532	0.766547	1.01495	0.854923	nucleus
CGIg02441	1720	S	0.187081	0.00116005	XP_034321460.1 rootletin isoform X17 [Crassostrea gigas]	--	_LINAS[Phospho (STY)]QNNLR_	1	Up	0.398144	0.483118	0.252006	2.02782	2.26518	1.76461	0.446072	0.276373	0.524104	2.64362	2.89657	2.56877	nucleus
CGIg02441	1806	S	0.150179	0.0395183	XP_034321460.1 rootletin isoform X17 [Crassostrea gigas]	--	_EPPRS[Phospho (STY)]PPGSSLR_	0.998057	Up	0.391279	0.229899		2.3983		1.73794			0.313026		1.78807		nucleus
CGIg02534	939	S	0.519473	0.000210527	Q6ZN16 M3K15_HUMAN Mitogen-activated protein kinase kinase kinase 15 OS=Homo sapiens OX=9606 GN=MAP3K15 PE=1 SV=2	MAP3K15	_S[Phospho (STY)]VHTGFLAMDR_	1	Up	0.630554	0.635608	0.635306	1.18635	1.13224	1.34178	0.653421	0.605527	0.603927	0.966865	1.03171	0.898452	nucleus	K13986	MAP3K15; mitogen-activated protein kinase kinase kinase 15 [EC:2.7.11.25]		GO:0000003 reproduction; GO:0000165 MAPK cascade; GO:0000302 response to reactive oxygen species; GO:0001932 regulation of protein phosphorylation; GO:0001934 positive regulation of protein phosphorylation; GO:0002225 positive regulation of antimicrobial peptide production; GO:0002376 immune system process; GO:0002682 regulation of immune system process; GO:0002684 positive regulation of immune s…	GO:0005622 intracellular anatomical structure; GO:0005737 cytoplasm; GO:0005783 endoplasmic reticulum; GO:0005789 endoplasmic reticulum membrane; GO:0005829 cytosol; GO:0005886 plasma membrane; GO:0009897 external side of plasma membrane; GO:0009986 cell surface; GO:0012505 endomembrane system; GO:0014069 postsynaptic density; GO:0016020 membrane; GO:0030424 axon; GO:0031984 organelle subcompartm…	GO:0000166 nucleotide binding; GO:0000287 magnesium ion binding; GO:0003824 catalytic activity; GO:0004672 protein kinase activity; GO:0004674 protein serine/threonine kinase activity; GO:0004709 MAP kinase kinase kinase activity; GO:0005488 binding; GO:0005515 protein binding; GO:0005524 ATP binding; GO:0016301 kinase activity; GO:0016740 transferase activity; GO:0016772 transferase activity, tr…	PF13281; PF19039; PF00069	PF13281 MAP3K TRAFs-binding domain; PF19039 ASK kinase PH domain; PF00069 Protein kinase domain		T	KOG4279	Serine/threonine protein kinase
CGIg02543	197	S	0.65396	0.0109945	Q52KI8 SRRM1_MOUSE Serine/arginine repetitive matrix protein 1 OS=Mus musculus OX=10090 GN=Srrm1 PE=1 SV=2	Srrm1	_KEKS[Phospho (STY)]PS[Phospho (STY)]PVK_	1	Up	0.853562	0.81087	0.644892	1.13405	1.11888	1.27837	1.15582	1.52804	1.22966	0.5656	0.798278	0.870868	nucleus	K13171	SRRM1, SRM160; serine/arginine repetitive matrix protein 1	map03013 Nucleocytoplasmic transport; map03015 mRNA surveillance pathway	GO:0000003 reproduction; GO:0000375 RNA splicing, via transesterification reactions; GO:0000377 RNA splicing, via transesterification reactions with bulged adenosine as nucleophile; GO:0000381 regulation of alternative mRNA splicing, via spliceosome; GO:0000398 mRNA splicing, via spliceosome; GO:0001654 eye development; GO:0003006 developmental process involved in reproduction; GO:0006139 nucleob…	GO:0005622 intracellular anatomical structure; GO:0005634 nucleus; GO:0005654 nucleoplasm; GO:0005681 spliceosomal complex; GO:0005737 cytoplasm; GO:0005829 cytosol; GO:0016363 nuclear matrix; GO:0016604 nuclear body; GO:0016607 nuclear speck; GO:0031974 membrane-enclosed lumen; GO:0031981 nuclear lumen; GO:0032991 protein-containing complex; GO:0034399 nuclear periphery; GO:0035145 exon-exon jun…					AR	KOG2146	Splicing coactivator SRm160/300, subunit SRm160 (contains PWI domain)
CGIg02543	819	S	0.653931	0.00983916	Q52KI8 SRRM1_MOUSE Serine/arginine repetitive matrix protein 1 OS=Mus musculus OX=10090 GN=Srrm1 PE=1 SV=2	Srrm1	_RPS[Phospho (STY)]PS[Phospho (STY)]PIR_	1	Up	1.08991	0.97626	0.826909	1.53551	1.54751	1.34113	0.963404	1.09405	1.43061	0.914655	1.01576	0.93359	nucleus	K13171	SRRM1, SRM160; serine/arginine repetitive matrix protein 1	map03013 Nucleocytoplasmic transport; map03015 mRNA surveillance pathway	GO:0000003 reproduction; GO:0000375 RNA splicing, via transesterification reactions; GO:0000377 RNA splicing, via transesterification reactions with bulged adenosine as nucleophile; GO:0000381 regulation of alternative mRNA splicing, via spliceosome; GO:0000398 mRNA splicing, via spliceosome; GO:0001654 eye development; GO:0003006 developmental process involved in reproduction; GO:0006139 nucleob…	GO:0005622 intracellular anatomical structure; GO:0005634 nucleus; GO:0005654 nucleoplasm; GO:0005681 spliceosomal complex; GO:0005737 cytoplasm; GO:0005829 cytosol; GO:0016363 nuclear matrix; GO:0016604 nuclear body; GO:0016607 nuclear speck; GO:0031974 membrane-enclosed lumen; GO:0031981 nuclear lumen; GO:0032991 protein-containing complex; GO:0034399 nuclear periphery; GO:0035145 exon-exon jun…					AR	KOG2146	Splicing coactivator SRm160/300, subunit SRm160 (contains PWI domain)
CGIg02543	821	S	0.653931	0.00983916	Q52KI8 SRRM1_MOUSE Serine/arginine repetitive matrix protein 1 OS=Mus musculus OX=10090 GN=Srrm1 PE=1 SV=2	Srrm1	_RPS[Phospho (STY)]PS[Phospho (STY)]PIR_	1	Up	1.08991	0.97626	0.826909	1.53551	1.54751	1.34113	0.963404	1.09405	1.43061	0.914655	1.01576	0.93359	nucleus	K13171	SRRM1, SRM160; serine/arginine repetitive matrix protein 1	map03013 Nucleocytoplasmic transport; map03015 mRNA surveillance pathway	GO:0000003 reproduction; GO:0000375 RNA splicing, via transesterification reactions; GO:0000377 RNA splicing, via transesterification reactions with bulged adenosine as nucleophile; GO:0000381 regulation of alternative mRNA splicing, via spliceosome; GO:0000398 mRNA splicing, via spliceosome; GO:0001654 eye development; GO:0003006 developmental process involved in reproduction; GO:0006139 nucleob…	GO:0005622 intracellular anatomical structure; GO:0005634 nucleus; GO:0005654 nucleoplasm; GO:0005681 spliceosomal complex; GO:0005737 cytoplasm; GO:0005829 cytosol; GO:0016363 nuclear matrix; GO:0016604 nuclear body; GO:0016607 nuclear speck; GO:0031974 membrane-enclosed lumen; GO:0031981 nuclear lumen; GO:0032991 protein-containing complex; GO:0034399 nuclear periphery; GO:0035145 exon-exon jun…					AR	KOG2146	Splicing coactivator SRm160/300, subunit SRm160 (contains PWI domain)
CGIg02543	876	S	0.636214	0.00298231	Q52KI8 SRRM1_MOUSE Serine/arginine repetitive matrix protein 1 OS=Mus musculus OX=10090 GN=Srrm1 PE=1 SV=2	Srrm1	_EFS[Phospho (STY)]ESDNYPQSK_	1	Up	0.888459	0.852293	0.805793	1.5048	1.21993	1.27793	0.780775	0.819107	1.22728	0.747724	0.825311	0.842829	nucleus	K13171	SRRM1, SRM160; serine/arginine repetitive matrix protein 1	map03013 Nucleocytoplasmic transport; map03015 mRNA surveillance pathway	GO:0000003 reproduction; GO:0000375 RNA splicing, via transesterification reactions; GO:0000377 RNA splicing, via transesterification reactions with bulged adenosine as nucleophile; GO:0000381 regulation of alternative mRNA splicing, via spliceosome; GO:0000398 mRNA splicing, via spliceosome; GO:0001654 eye development; GO:0003006 developmental process involved in reproduction; GO:0006139 nucleob…	GO:0005622 intracellular anatomical structure; GO:0005634 nucleus; GO:0005654 nucleoplasm; GO:0005681 spliceosomal complex; GO:0005737 cytoplasm; GO:0005829 cytosol; GO:0016363 nuclear matrix; GO:0016604 nuclear body; GO:0016607 nuclear speck; GO:0031974 membrane-enclosed lumen; GO:0031981 nuclear lumen; GO:0032991 protein-containing complex; GO:0034399 nuclear periphery; GO:0035145 exon-exon jun…					AR	KOG2146	Splicing coactivator SRm160/300, subunit SRm160 (contains PWI domain)
CGIg02543	758	S	0.596286	0.0112191	Q52KI8 SRRM1_MOUSE Serine/arginine repetitive matrix protein 1 OS=Mus musculus OX=10090 GN=Srrm1 PE=1 SV=2	Srrm1	_EPS[Phospho (STY)]PPPR_	1	Up	0.816364	0.758996	0.630396	1.40645	1.04445	1.24825	0.84944	1.18193	1.17382	0.667616	0.590667	0.659092	nucleus	K13171	SRRM1, SRM160; serine/arginine repetitive matrix protein 1	map03013 Nucleocytoplasmic transport; map03015 mRNA surveillance pathway	GO:0000003 reproduction; GO:0000375 RNA splicing, via transesterification reactions; GO:0000377 RNA splicing, via transesterification reactions with bulged adenosine as nucleophile; GO:0000381 regulation of alternative mRNA splicing, via spliceosome; GO:0000398 mRNA splicing, via spliceosome; GO:0001654 eye development; GO:0003006 developmental process involved in reproduction; GO:0006139 nucleob…	GO:0005622 intracellular anatomical structure; GO:0005634 nucleus; GO:0005654 nucleoplasm; GO:0005681 spliceosomal complex; GO:0005737 cytoplasm; GO:0005829 cytosol; GO:0016363 nuclear matrix; GO:0016604 nuclear body; GO:0016607 nuclear speck; GO:0031974 membrane-enclosed lumen; GO:0031981 nuclear lumen; GO:0032991 protein-containing complex; GO:0034399 nuclear periphery; GO:0035145 exon-exon jun…					AR	KOG2146	Splicing coactivator SRm160/300, subunit SRm160 (contains PWI domain)
CGIg02543	204	S	0.554286	0.00274371	Q52KI8 SRRM1_MOUSE Serine/arginine repetitive matrix protein 1 OS=Mus musculus OX=10090 GN=Srrm1 PE=1 SV=2	Srrm1	_NSES[Phospho (STY)]PKKPDESALEAK_	1	Up	0.633752	0.584712	0.501313	1.13482	1.03809	0.929782	1.04276	1.22012	1.96643	1.25379	1.34915	1.78844	nucleus	K13171	SRRM1, SRM160; serine/arginine repetitive matrix protein 1	map03013 Nucleocytoplasmic transport; map03015 mRNA surveillance pathway	GO:0000003 reproduction; GO:0000375 RNA splicing, via transesterification reactions; GO:0000377 RNA splicing, via transesterification reactions with bulged adenosine as nucleophile; GO:0000381 regulation of alternative mRNA splicing, via spliceosome; GO:0000398 mRNA splicing, via spliceosome; GO:0001654 eye development; GO:0003006 developmental process involved in reproduction; GO:0006139 nucleob…	GO:0005622 intracellular anatomical structure; GO:0005634 nucleus; GO:0005654 nucleoplasm; GO:0005681 spliceosomal complex; GO:0005737 cytoplasm; GO:0005829 cytosol; GO:0016363 nuclear matrix; GO:0016604 nuclear body; GO:0016607 nuclear speck; GO:0031974 membrane-enclosed lumen; GO:0031981 nuclear lumen; GO:0032991 protein-containing complex; GO:0034399 nuclear periphery; GO:0035145 exon-exon jun…					AR	KOG2146	Splicing coactivator SRm160/300, subunit SRm160 (contains PWI domain)
CGIg02543	652	S	0.413935	0.000310606	Q52KI8 SRRM1_MOUSE Serine/arginine repetitive matrix protein 1 OS=Mus musculus OX=10090 GN=Srrm1 PE=1 SV=2	Srrm1	_RRPVES[Phospho (STY)]PEPVR_	1	Up	0.843501	0.722704	0.660871	1.72973	1.88841	1.76211	1.06771	1.13179	1.47261	0.357315	0.374477	0.342777	nucleus	K13171	SRRM1, SRM160; serine/arginine repetitive matrix protein 1	map03013 Nucleocytoplasmic transport; map03015 mRNA surveillance pathway	GO:0000003 reproduction; GO:0000375 RNA splicing, via transesterification reactions; GO:0000377 RNA splicing, via transesterification reactions with bulged adenosine as nucleophile; GO:0000381 regulation of alternative mRNA splicing, via spliceosome; GO:0000398 mRNA splicing, via spliceosome; GO:0001654 eye development; GO:0003006 developmental process involved in reproduction; GO:0006139 nucleob…	GO:0005622 intracellular anatomical structure; GO:0005634 nucleus; GO:0005654 nucleoplasm; GO:0005681 spliceosomal complex; GO:0005737 cytoplasm; GO:0005829 cytosol; GO:0016363 nuclear matrix; GO:0016604 nuclear body; GO:0016607 nuclear speck; GO:0031974 membrane-enclosed lumen; GO:0031981 nuclear lumen; GO:0032991 protein-containing complex; GO:0034399 nuclear periphery; GO:0035145 exon-exon jun…					AR	KOG2146	Splicing coactivator SRm160/300, subunit SRm160 (contains PWI domain)
CGIg02543	559	S	0.244728	0.000197569	Q52KI8 SRRM1_MOUSE Serine/arginine repetitive matrix protein 1 OS=Mus musculus OX=10090 GN=Srrm1 PE=1 SV=2	Srrm1	_RRES[Phospho (STY)]LGS[Phospho (STY)]PR_	1	Up	0.41361	0.484715	0.414954	1.90785	1.98542	1.47299	0.404839	0.418398	0.531742	0.766577	0.789733	0.695018	nucleus	K13171	SRRM1, SRM160; serine/arginine repetitive matrix protein 1	map03013 Nucleocytoplasmic transport; map03015 mRNA surveillance pathway	GO:0000003 reproduction; GO:0000375 RNA splicing, via transesterification reactions; GO:0000377 RNA splicing, via transesterification reactions with bulged adenosine as nucleophile; GO:0000381 regulation of alternative mRNA splicing, via spliceosome; GO:0000398 mRNA splicing, via spliceosome; GO:0001654 eye development; GO:0003006 developmental process involved in reproduction; GO:0006139 nucleob…	GO:0005622 intracellular anatomical structure; GO:0005634 nucleus; GO:0005654 nucleoplasm; GO:0005681 spliceosomal complex; GO:0005737 cytoplasm; GO:0005829 cytosol; GO:0016363 nuclear matrix; GO:0016604 nuclear body; GO:0016607 nuclear speck; GO:0031974 membrane-enclosed lumen; GO:0031981 nuclear lumen; GO:0032991 protein-containing complex; GO:0034399 nuclear periphery; GO:0035145 exon-exon jun…					AR	KOG2146	Splicing coactivator SRm160/300, subunit SRm160 (contains PWI domain)
CGIg02543	562	S	0.244728	0.000197569	Q52KI8 SRRM1_MOUSE Serine/arginine repetitive matrix protein 1 OS=Mus musculus OX=10090 GN=Srrm1 PE=1 SV=2	Srrm1	_RRES[Phospho (STY)]LGS[Phospho (STY)]PR_	1	Up	0.41361	0.484715	0.414954	1.90785	1.98542	1.47299	0.404839	0.418398	0.531742	0.766577	0.789733	0.695018	nucleus	K13171	SRRM1, SRM160; serine/arginine repetitive matrix protein 1	map03013 Nucleocytoplasmic transport; map03015 mRNA surveillance pathway	GO:0000003 reproduction; GO:0000375 RNA splicing, via transesterification reactions; GO:0000377 RNA splicing, via transesterification reactions with bulged adenosine as nucleophile; GO:0000381 regulation of alternative mRNA splicing, via spliceosome; GO:0000398 mRNA splicing, via spliceosome; GO:0001654 eye development; GO:0003006 developmental process involved in reproduction; GO:0006139 nucleob…	GO:0005622 intracellular anatomical structure; GO:0005634 nucleus; GO:0005654 nucleoplasm; GO:0005681 spliceosomal complex; GO:0005737 cytoplasm; GO:0005829 cytosol; GO:0016363 nuclear matrix; GO:0016604 nuclear body; GO:0016607 nuclear speck; GO:0031974 membrane-enclosed lumen; GO:0031981 nuclear lumen; GO:0032991 protein-containing complex; GO:0034399 nuclear periphery; GO:0035145 exon-exon jun…					AR	KOG2146	Splicing coactivator SRm160/300, subunit SRm160 (contains PWI domain)
CGIg02543	603	S	0.0954571	0.000117141	Q52KI8 SRRM1_MOUSE Serine/arginine repetitive matrix protein 1 OS=Mus musculus OX=10090 GN=Srrm1 PE=1 SV=2	Srrm1	_RSS[Phospho (STY)]PPILK_	1	Up		0.165588	0.15608	1.9146	1.56076	1.57929	1.50023	1.69972	2.33841	0.683309	0.787578	0.797177	nucleus	K13171	SRRM1, SRM160; serine/arginine repetitive matrix protein 1	map03013 Nucleocytoplasmic transport; map03015 mRNA surveillance pathway	GO:0000003 reproduction; GO:0000375 RNA splicing, via transesterification reactions; GO:0000377 RNA splicing, via transesterification reactions with bulged adenosine as nucleophile; GO:0000381 regulation of alternative mRNA splicing, via spliceosome; GO:0000398 mRNA splicing, via spliceosome; GO:0001654 eye development; GO:0003006 developmental process involved in reproduction; GO:0006139 nucleob…	GO:0005622 intracellular anatomical structure; GO:0005634 nucleus; GO:0005654 nucleoplasm; GO:0005681 spliceosomal complex; GO:0005737 cytoplasm; GO:0005829 cytosol; GO:0016363 nuclear matrix; GO:0016604 nuclear body; GO:0016607 nuclear speck; GO:0031974 membrane-enclosed lumen; GO:0031981 nuclear lumen; GO:0032991 protein-containing complex; GO:0034399 nuclear periphery; GO:0035145 exon-exon jun…					AR	KOG2146	Splicing coactivator SRm160/300, subunit SRm160 (contains PWI domain)
CGIg02548	18	T	0.263138	2.70347e-05	P04792 HSPB1_HUMAN Heat shock protein beta-1 OS=Homo sapiens OX=9606 GN=HSPB1 PE=1 SV=2	HSPB1	_PGYQAQGT[Phospho (STY)]PMR_	1	Up	0.35575	0.411815	0.338754	1.42239	1.34733	1.43462	0.396762	0.443959	0.412832	1.32783	1.27602	1.0772	cytoplasm	K04455	HSPB1; heat shock protein beta-1	map04010 MAPK signaling pathway; map04370 VEGF signaling pathway	GO:0000003 reproduction; GO:0000302 response to reactive oxygen species; GO:0001101 response to acid chemical; GO:0001666 response to hypoxia; GO:0001817 regulation of cytokine production; GO:0001819 positive regulation of cytokine production; GO:0001932 regulation of protein phosphorylation; GO:0001933 negative regulation of protein phosphorylation; GO:0002931 response to ischemia; GO:0006417 re…	GO:0000502 proteasome complex; GO:0005622 intracellular anatomical structure; GO:0005634 nucleus; GO:0005737 cytoplasm; GO:0005739 mitochondrion; GO:0005759 mitochondrial matrix; GO:0005829 cytosol; GO:0005856 cytoskeleton; GO:0005886 plasma membrane; GO:0014069 postsynaptic density; GO:0016020 membrane; GO:0030016 myofibril; GO:0030017 sarcomere; GO:0030018 Z disc; GO:0030424 axon; GO:0030425 de…	GO:0003779 actin binding; GO:0004857 enzyme inhibitor activity; GO:0004860 protein kinase inhibitor activity; GO:0005080 protein kinase C binding; GO:0005488 binding; GO:0005515 protein binding; GO:0008092 cytoskeletal protein binding; GO:0008426 protein kinase C inhibitor activity; GO:0017022 myosin binding; GO:0019207 kinase regulator activity; GO:0019210 kinase inhibitor activity; GO:0019887 p…	PF00011	PF00011 Hsp20/alpha crystallin family		O	KOG3591	Alpha crystallins
CGIg02548	208	T	0.177292	3.0401e-07	P04792 HSPB1_HUMAN Heat shock protein beta-1 OS=Homo sapiens OX=9606 GN=HSPB1 PE=1 SV=2	HSPB1	_EFT[Phospho (STY)]VPEGMDC[Carbamidomethyl (C)]SQVK_	1	Up	0.316037	0.337675	0.341788	1.85314	1.85624	1.90565	0.847738	0.759723	1.00781	1.16464	1.24507	1.13543	cytoplasm	K04455	HSPB1; heat shock protein beta-1	map04010 MAPK signaling pathway; map04370 VEGF signaling pathway	GO:0000003 reproduction; GO:0000302 response to reactive oxygen species; GO:0001101 response to acid chemical; GO:0001666 response to hypoxia; GO:0001817 regulation of cytokine production; GO:0001819 positive regulation of cytokine production; GO:0001932 regulation of protein phosphorylation; GO:0001933 negative regulation of protein phosphorylation; GO:0002931 response to ischemia; GO:0006417 re…	GO:0000502 proteasome complex; GO:0005622 intracellular anatomical structure; GO:0005634 nucleus; GO:0005737 cytoplasm; GO:0005739 mitochondrion; GO:0005759 mitochondrial matrix; GO:0005829 cytosol; GO:0005856 cytoskeleton; GO:0005886 plasma membrane; GO:0014069 postsynaptic density; GO:0016020 membrane; GO:0030016 myofibril; GO:0030017 sarcomere; GO:0030018 Z disc; GO:0030424 axon; GO:0030425 de…	GO:0003779 actin binding; GO:0004857 enzyme inhibitor activity; GO:0004860 protein kinase inhibitor activity; GO:0005080 protein kinase C binding; GO:0005488 binding; GO:0005515 protein binding; GO:0008092 cytoskeletal protein binding; GO:0008426 protein kinase C inhibitor activity; GO:0017022 myosin binding; GO:0019207 kinase regulator activity; GO:0019210 kinase inhibitor activity; GO:0019887 p…	PF00011	PF00011 Hsp20/alpha crystallin family	PF00011 Hsp20/alpha crystallin family	O	KOG3591	Alpha crystallins
CGIg02598	53	S	0.293026	0.0168727	Q5RB77 PDCL3_PONAB Phosducin-like protein 3 OS=Pongo abelii OX=9601 GN=PDCL3 PE=2 SV=1	PDCL3	_SFEDMS[Phospho (STY)]LDELNEKEDDIDEEEER_	0.999557	Up	0.213103	0.615291	0.311743	1.36962	1.01326	1.50804	0.156309	0.00014239	0.491635	2.68257	2.20843	1.74077	cytoplasm				GO:0001932 regulation of protein phosphorylation; GO:0001936 regulation of endothelial cell proliferation; GO:0001938 positive regulation of endothelial cell proliferation; GO:0006139 nucleobase-containing compound metabolic process; GO:0006457 protein folding; GO:0006725 cellular aromatic compound metabolic process; GO:0006807 nitrogen compound metabolic process; GO:0008152 metabolic process; GO…	GO:0005622 intracellular anatomical structure; GO:0005634 nucleus; GO:0005737 cytoplasm; GO:0005829 cytosol; GO:0043226 organelle; GO:0043227 membrane-bounded organelle; GO:0043229 intracellular organelle; GO:0043231 intracellular membrane-bounded organelle;	GO:0005102 signaling receptor binding; GO:0005126 cytokine receptor binding; GO:0005172 vascular endothelial growth factor receptor binding; GO:0005488 binding; GO:0005515 protein binding; GO:0043184 vascular endothelial growth factor receptor 2 binding; GO:0044183 protein folding chaperone; GO:0070851 growth factor receptor binding;	PF02114	PF02114 Phosducin	PF02114 Phosducin	T	KOG3170	Conserved phosducin-like protein
CGIg02607	51	T	0.543297	0.000759644	Q18297 TRPA1_CAEEL Transient receptor potential cation channel subfamily A member 1 homolog OS=Caenorhabditis elegans OX=6239 GN=trpa-1 PE=2 SV=5	trpa-1	_SDT[Phospho (STY)]ADLLNLTLHQC[Carbamidomethyl (C)]AR_	1	Up	0.975847	0.931413	0.892135	1.51751	1.8329	1.8022	0.464633	0.286167	0.484493	1.96425	1.8261	1.92888	plasma membrane	K04984	TRPA1, ANKTM1; transient receptor potential cation channel subfamily A member 1	map04750 Inflammatory mediator regulation of TRP channels		GO:0005929 cilium; GO:0036477 somatodendritic compartment; GO:0042995 cell projection; GO:0043025 neuronal cell body; GO:0043226 organelle; GO:0044297 cell body; GO:0097730 non-motile cilium; GO:0120025 plasma membrane bounded cell projection;					R	KOG0510	Ankyrin repeat protein
CGIg02644	254	T	0.212219	2.03707e-05	XP_011421097.2 uncharacterized protein LOC105323716 isoform X1 [Crassostrea gigas]	--	_ATT[Phospho (STY)]PNKPVPQSK_	1	Up	0.3503	0.333503	0.409292	1.80638	1.67608	1.66832	0.446581	0.40967	0.450451	1.17585	1.25311	1.13112	mitochondria
CGIg02647	815	S	0.394964	0.00876772	Q9N1T2 RPGR_CANLF X-linked retinitis pigmentosa GTPase regulator OS=Canis lupus familiaris OX=9615 GN=RPGR PE=2 SV=1	RPGR	_S[Phospho (STY)]EGEEDEDKDDGDKEEK_	1	Up	0.314534	0.486805	0.623191	1.25603	1.13473	1.21598	0.0985282	0.843125	1.04533	0.722523	0.636443	0.298817	nucleus	K19607	RPGR; X-linked retinitis pigmentosa GTPase regulator		GO:0001654 eye development; GO:0001754 eye photoreceptor cell differentiation; GO:0003008 system process; GO:0006810 transport; GO:0006886 intracellular protein transport; GO:0006996 organelle organization; GO:0007017 microtubule-based process; GO:0007018 microtubule-based movement; GO:0007275 multicellular organism development; GO:0007399 nervous system development; GO:0007423 sensory organ deve…	GO:0001750 photoreceptor outer segment; GO:0005622 intracellular anatomical structure; GO:0005737 cytoplasm; GO:0005794 Golgi apparatus; GO:0005813 centrosome; GO:0005815 microtubule organizing center; GO:0005856 cytoskeleton; GO:0005929 cilium; GO:0012505 endomembrane system; GO:0015630 microtubule cytoskeleton; GO:0031514 motile cilium; GO:0032391 photoreceptor connecting cilium; GO:0035869 cil…					S	KOG1426	FOG: RCC1 domain
CGIg02664	85	T	0.50174	0.0265748	XP_034334625.1 E3 ubiquitin-protein ligase TRIM71-like isoform X1 [Crassostrea gigas]	--	_C[Carbamidomethyl (C)]DVC[Carbamidomethyl (C)]DT[Phospho (STY)]PVPPLHC[Carbamidomethyl (C)]DFC[Carbamidomethyl (C)]QTNLC[Carbamidomethyl (C)]K_	1	Up		0.570219	0.445664	1.06826	0.808982	1.15984	0.585341	0.535449	0.238716	2.07321	2.20624	1.8187	nucleus	K11997	TRIM2_3; tripartite motif-containing protein 2/3		GO:0000003 reproduction; GO:0000209 protein polyubiquitination; GO:0001816 cytokine production; GO:0001817 regulation of cytokine production; GO:0002252 immune effector process; GO:0002376 immune system process; GO:0003006 developmental process involved in reproduction; GO:0006807 nitrogen compound metabolic process; GO:0006950 response to stress; GO:0006952 defense response; GO:0006955 immune re…	GO:0005622 intracellular anatomical structure; GO:0005737 cytoplasm; GO:0005829 cytosol;	GO:0003824 catalytic activity; GO:0004842 ubiquitin-protein transferase activity; GO:0005488 binding; GO:0008270 zinc ion binding; GO:0016740 transferase activity; GO:0019787 ubiquitin-like protein transferase activity; GO:0043167 ion binding; GO:0043169 cation binding; GO:0046872 metal ion binding; GO:0046914 transition metal ion binding; GO:0061630 ubiquitin protein ligase activity; GO:0061659 …	PF00643	PF00643 B-box zinc finger		O	KOG2177	Predicted E3 ubiquitin ligase
CGIg02664	265	S	0.243232	0.000843403	XP_034334625.1 E3 ubiquitin-protein ligase TRIM71-like isoform X1 [Crassostrea gigas]	--	_TIS[Phospho (STY)]EIT[Phospho (STY)]QNIADLK_	0.999977	Up	0.325375	0.380503	0.480763	1.37538	1.52204	1.98121	0.334036	0.276956	0.309914	1.76539	2.47725	2.02061	nucleus	K11997	TRIM2_3; tripartite motif-containing protein 2/3		GO:0000003 reproduction; GO:0000209 protein polyubiquitination; GO:0001816 cytokine production; GO:0001817 regulation of cytokine production; GO:0002252 immune effector process; GO:0002376 immune system process; GO:0003006 developmental process involved in reproduction; GO:0006807 nitrogen compound metabolic process; GO:0006950 response to stress; GO:0006952 defense response; GO:0006955 immune re…	GO:0005622 intracellular anatomical structure; GO:0005737 cytoplasm; GO:0005829 cytosol;	GO:0003824 catalytic activity; GO:0004842 ubiquitin-protein transferase activity; GO:0005488 binding; GO:0008270 zinc ion binding; GO:0016740 transferase activity; GO:0019787 ubiquitin-like protein transferase activity; GO:0043167 ion binding; GO:0043169 cation binding; GO:0046872 metal ion binding; GO:0046914 transition metal ion binding; GO:0061630 ubiquitin protein ligase activity; GO:0061659 …	PF00643	PF00643 B-box zinc finger		O	KOG2177	Predicted E3 ubiquitin ligase
CGIg02664	268	T	0.243232	0.000843403	XP_034334625.1 E3 ubiquitin-protein ligase TRIM71-like isoform X1 [Crassostrea gigas]	--	_TIS[Phospho (STY)]EIT[Phospho (STY)]QNIADLK_	0.999977	Up	0.325375	0.380503	0.480763	1.37538	1.52204	1.98121	0.334036	0.276956	0.309914	1.76539	2.47725	2.02061	nucleus	K11997	TRIM2_3; tripartite motif-containing protein 2/3		GO:0000003 reproduction; GO:0000209 protein polyubiquitination; GO:0001816 cytokine production; GO:0001817 regulation of cytokine production; GO:0002252 immune effector process; GO:0002376 immune system process; GO:0003006 developmental process involved in reproduction; GO:0006807 nitrogen compound metabolic process; GO:0006950 response to stress; GO:0006952 defense response; GO:0006955 immune re…	GO:0005622 intracellular anatomical structure; GO:0005737 cytoplasm; GO:0005829 cytosol;	GO:0003824 catalytic activity; GO:0004842 ubiquitin-protein transferase activity; GO:0005488 binding; GO:0008270 zinc ion binding; GO:0016740 transferase activity; GO:0019787 ubiquitin-like protein transferase activity; GO:0043167 ion binding; GO:0043169 cation binding; GO:0046872 metal ion binding; GO:0046914 transition metal ion binding; GO:0061630 ubiquitin protein ligase activity; GO:0061659 …	PF00643	PF00643 B-box zinc finger		O	KOG2177	Predicted E3 ubiquitin ligase
CGIg02673	1989	S	0.562953	0.0167017	F1QH17 MCA3A_DANRE Protein-methionine sulfoxide oxidase mical3a OS=Danio rerio OX=7955 GN=mical3a PE=2 SV=2	mical3a	_TMS[Phospho (STY)]EDELNYR_	1	Up	0.815656	0.551669	0.510149	1.06792	1.06727	1.19986	0.44704	0.450142	0.540687	1.40484	1.03974	1.05786	nucleus	K19947	MICAL; F-actin monooxygenase [EC:1.14.13.225]		GO:0006996 organelle organization; GO:0007010 cytoskeleton organization; GO:0007015 actin filament organization; GO:0008152 metabolic process; GO:0008154 actin polymerization or depolymerization; GO:0009987 cellular process; GO:0016043 cellular component organization; GO:0022411 cellular component disassembly; GO:0030029 actin filament-based process; GO:0030036 actin cytoskeleton organization; GO…	GO:0005622 intracellular anatomical structure; GO:0005634 nucleus; GO:0005654 nucleoplasm; GO:0005737 cytoplasm; GO:0005829 cytosol; GO:0005886 plasma membrane; GO:0016020 membrane; GO:0031974 membrane-enclosed lumen; GO:0031981 nuclear lumen; GO:0043226 organelle; GO:0043227 membrane-bounded organelle; GO:0043229 intracellular organelle; GO:0043231 intracellular membrane-bounded organelle; GO:00…	GO:0000166 nucleotide binding; GO:0003779 actin binding; GO:0003824 catalytic activity; GO:0004497 monooxygenase activity; GO:0005488 binding; GO:0005515 protein binding; GO:0008092 cytoskeletal protein binding; GO:0016491 oxidoreductase activity; GO:0016705 oxidoreductase activity, acting on paired donors, with incorporation or reduction of molecular oxygen; GO:0016709 oxidoreductase activity, a…	PF00307; PF12130	PF00307 Calponin homology (CH) domain; PF12130 Bivalent Mical/EHBP Rab binding domain		TZ	KOG1700	Regulatory protein MLP and related LIM proteins
CGIg02673	1868	S	0.344606	0.000305985	F1QH17 MCA3A_DANRE Protein-methionine sulfoxide oxidase mical3a OS=Danio rerio OX=7955 GN=mical3a PE=2 SV=2	mical3a	_S[Phospho (STY)]LLQILKPGK_	1	Up	0.608045	0.44374	0.50554	1.50313	1.53146	1.48456	0.643836	0.51848	0.433652	1.73402	1.73371	1.76351	nucleus	K19947	MICAL; F-actin monooxygenase [EC:1.14.13.225]		GO:0006996 organelle organization; GO:0007010 cytoskeleton organization; GO:0007015 actin filament organization; GO:0008152 metabolic process; GO:0008154 actin polymerization or depolymerization; GO:0009987 cellular process; GO:0016043 cellular component organization; GO:0022411 cellular component disassembly; GO:0030029 actin filament-based process; GO:0030036 actin cytoskeleton organization; GO…	GO:0005622 intracellular anatomical structure; GO:0005634 nucleus; GO:0005654 nucleoplasm; GO:0005737 cytoplasm; GO:0005829 cytosol; GO:0005886 plasma membrane; GO:0016020 membrane; GO:0031974 membrane-enclosed lumen; GO:0031981 nuclear lumen; GO:0043226 organelle; GO:0043227 membrane-bounded organelle; GO:0043229 intracellular organelle; GO:0043231 intracellular membrane-bounded organelle; GO:00…	GO:0000166 nucleotide binding; GO:0003779 actin binding; GO:0003824 catalytic activity; GO:0004497 monooxygenase activity; GO:0005488 binding; GO:0005515 protein binding; GO:0008092 cytoskeletal protein binding; GO:0016491 oxidoreductase activity; GO:0016705 oxidoreductase activity, acting on paired donors, with incorporation or reduction of molecular oxygen; GO:0016709 oxidoreductase activity, a…	PF00307; PF12130	PF00307 Calponin homology (CH) domain; PF12130 Bivalent Mical/EHBP Rab binding domain		TZ	KOG1700	Regulatory protein MLP and related LIM proteins
CGIg02673	1930	S	0.286025	0.00976804	F1QH17 MCA3A_DANRE Protein-methionine sulfoxide oxidase mical3a OS=Danio rerio OX=7955 GN=mical3a PE=2 SV=2	mical3a	_DLS[Phospho (STY)]ELNLVGIK_	1	Up	0.724377	0.504744	0.296792	2.18095	1.61926	1.53468	0.737545	0.417123	0.385931	2.26294	2.12469	2.02919	nucleus	K19947	MICAL; F-actin monooxygenase [EC:1.14.13.225]		GO:0006996 organelle organization; GO:0007010 cytoskeleton organization; GO:0007015 actin filament organization; GO:0008152 metabolic process; GO:0008154 actin polymerization or depolymerization; GO:0009987 cellular process; GO:0016043 cellular component organization; GO:0022411 cellular component disassembly; GO:0030029 actin filament-based process; GO:0030036 actin cytoskeleton organization; GO…	GO:0005622 intracellular anatomical structure; GO:0005634 nucleus; GO:0005654 nucleoplasm; GO:0005737 cytoplasm; GO:0005829 cytosol; GO:0005886 plasma membrane; GO:0016020 membrane; GO:0031974 membrane-enclosed lumen; GO:0031981 nuclear lumen; GO:0043226 organelle; GO:0043227 membrane-bounded organelle; GO:0043229 intracellular organelle; GO:0043231 intracellular membrane-bounded organelle; GO:00…	GO:0000166 nucleotide binding; GO:0003779 actin binding; GO:0003824 catalytic activity; GO:0004497 monooxygenase activity; GO:0005488 binding; GO:0005515 protein binding; GO:0008092 cytoskeletal protein binding; GO:0016491 oxidoreductase activity; GO:0016705 oxidoreductase activity, acting on paired donors, with incorporation or reduction of molecular oxygen; GO:0016709 oxidoreductase activity, a…	PF00307; PF12130	PF00307 Calponin homology (CH) domain; PF12130 Bivalent Mical/EHBP Rab binding domain		TZ	KOG1700	Regulatory protein MLP and related LIM proteins
CGIg02673	1080	S	0.168531	6.90702e-05	F1QH17 MCA3A_DANRE Protein-methionine sulfoxide oxidase mical3a OS=Danio rerio OX=7955 GN=mical3a PE=2 SV=2	mical3a	_ADFFTS[Phospho (STY)]PPEPVR_	0.999998	Up	0.177454	0.220575	0.247846	1.3128	1.18465	1.33493	0.293092	0.372907	0.395943	1.16395	0.847225	1.00014	nucleus	K19947	MICAL; F-actin monooxygenase [EC:1.14.13.225]		GO:0006996 organelle organization; GO:0007010 cytoskeleton organization; GO:0007015 actin filament organization; GO:0008152 metabolic process; GO:0008154 actin polymerization or depolymerization; GO:0009987 cellular process; GO:0016043 cellular component organization; GO:0022411 cellular component disassembly; GO:0030029 actin filament-based process; GO:0030036 actin cytoskeleton organization; GO…	GO:0005622 intracellular anatomical structure; GO:0005634 nucleus; GO:0005654 nucleoplasm; GO:0005737 cytoplasm; GO:0005829 cytosol; GO:0005886 plasma membrane; GO:0016020 membrane; GO:0031974 membrane-enclosed lumen; GO:0031981 nuclear lumen; GO:0043226 organelle; GO:0043227 membrane-bounded organelle; GO:0043229 intracellular organelle; GO:0043231 intracellular membrane-bounded organelle; GO:00…	GO:0000166 nucleotide binding; GO:0003779 actin binding; GO:0003824 catalytic activity; GO:0004497 monooxygenase activity; GO:0005488 binding; GO:0005515 protein binding; GO:0008092 cytoskeletal protein binding; GO:0016491 oxidoreductase activity; GO:0016705 oxidoreductase activity, acting on paired donors, with incorporation or reduction of molecular oxygen; GO:0016709 oxidoreductase activity, a…	PF00307; PF12130	PF00307 Calponin homology (CH) domain; PF12130 Bivalent Mical/EHBP Rab binding domain		TZ	KOG1700	Regulatory protein MLP and related LIM proteins
CGIg02701	349	S	0.270487	0.00101796	XP_011418877.3 uncharacterized protein LOC105322056 [Crassostrea gigas]	--	_TDSGIGEGS[Phospho (STY)]VC[Carbamidomethyl (C)]S[Phospho (STY)]DVKDNHPDDLDDPK_	1	Up	0.461299	0.276904	0.316383	1.23622	1.3032	1.35942	0.389654	0.395043	0.375144	2.04876	1.69526	1.63084	nucleus	K21754	KCTD1_15; BTB/POZ domain-containing protein KCTD1/15
CGIg02701	346	S	0.221368	1.91337e-05	XP_011418877.3 uncharacterized protein LOC105322056 [Crassostrea gigas]	--	_TDSGIGEGS[Phospho (STY)]VC[Carbamidomethyl (C)]S[Phospho (STY)]DVKDNHPDDLDDPK_	1	Up	0.314863	0.294711	0.33673	1.30138	1.42071	1.55271	0.414713	0.420449	0.399269	1.86548	1.68962	1.66073	nucleus	K21754	KCTD1_15; BTB/POZ domain-containing protein KCTD1/15
CGIg02701	602	S	0.200979	4.4092e-05	XP_011418877.3 uncharacterized protein LOC105322056 [Crassostrea gigas]	--	_S[Phospho (STY)]LTDLNAGIPR_	1	Up	0.371587	0.306527	0.335009	1.8372	1.71849	1.48524	0.331684	0.365309	0.416735	1.83624	1.82916	1.5169	nucleus	K21754	KCTD1_15; BTB/POZ domain-containing protein KCTD1/15
CGIg02720	215	S	0.565802	0.030984	Q8TAV0 FA76A_HUMAN Protein FAM76A OS=Homo sapiens OX=9606 GN=FAM76A PE=2 SV=1	FAM76A	_LEFPEEGS[Phospho (STY)]DLPNSSSAGGHSHSHR_	0.99998	Up	0.573357	0.731449		1.12016	1.34987	0.989147		0.375334	0.358049	1.22973	1.40472	1.78102	nucleus					GO:0005622 intracellular anatomical structure; GO:0005634 nucleus; GO:0005654 nucleoplasm; GO:0016604 nuclear body; GO:0016607 nuclear speck; GO:0031974 membrane-enclosed lumen; GO:0031981 nuclear lumen; GO:0043226 organelle; GO:0043227 membrane-bounded organelle; GO:0043229 intracellular organelle; GO:0043231 intracellular membrane-bounded organelle; GO:0043233 organelle lumen; GO:0070013 intrac…					S	KOG3990	Uncharacterized conserved protein
CGIg02763	425	T	0.424723	0.00884764	Q96QF0 RAB3I_HUMAN Rab-3A-interacting protein OS=Homo sapiens OX=9606 GN=RAB3IP PE=1 SV=1	RAB3IP	_ST[Phospho (STY)]S[Phospho (STY)]HHEFTK_	0.960403	Up	0.709313	0.977813	0.605064	1.7548	1.46815	2.17396	0.756794		1.01458	1.75169	1.62957		nucleus	K16779	RAB3IP, RABIN8; Rab-3A-interacting protein		GO:0006605 protein targeting; GO:0006612 protein targeting to membrane; GO:0006810 transport; GO:0006886 intracellular protein transport; GO:0006892 post-Golgi vesicle-mediated transport; GO:0006893 Golgi to plasma membrane transport; GO:0006996 organelle organization; GO:0008104 protein localization; GO:0009987 cellular process; GO:0015031 protein transport; GO:0015833 peptide transport; GO:0016…	GO:0005622 intracellular anatomical structure; GO:0005634 nucleus; GO:0005737 cytoplasm; GO:0005813 centrosome; GO:0005815 microtubule organizing center; GO:0005829 cytosol; GO:0005856 cytoskeleton; GO:0005929 cilium; GO:0015630 microtubule cytoskeleton; GO:0030027 lamellipodium; GO:0030425 dendrite; GO:0031252 cell leading edge; GO:0036064 ciliary basal body; GO:0036477 somatodendritic compartme…	GO:0005085 guanyl-nucleotide exchange factor activity; GO:0005488 binding; GO:0005515 protein binding; GO:0019899 enzyme binding; GO:0019900 kinase binding; GO:0031267 small GTPase binding; GO:0042802 identical protein binding; GO:0051020 GTPase binding; GO:0098772 molecular function regulator activity;				U	KOG4324	Guanine nucleotide exchange factor
CGIg02792	282	S	0.567142	0.00375979	O15990 KARG_LIOJA Arginine kinase OS=Liolophura japonica OX=13599 PE=2 SV=1	--	_LTFAYS[Phospho (STY)]K_	1	Up	0.671029	0.505996	0.512011	0.983985	0.957741	1.03642	0.858124	1.04472	1.11378	0.776704	0.654942	0.716917	cytoplasm	K00934	E2.7.3.3; arginine kinase [EC:2.7.3.3]	map00330 Arginine and proline metabolism	GO:0006793 phosphorus metabolic process; GO:0006796 phosphate-containing compound metabolic process; GO:0008152 metabolic process; GO:0009987 cellular process; GO:0016310 phosphorylation; GO:0044237 cellular metabolic process;		GO:0003824 catalytic activity; GO:0004054 arginine kinase activity; GO:0016301 kinase activity; GO:0016740 transferase activity; GO:0016772 transferase activity, transferring phosphorus-containing groups; GO:0016775 phosphotransferase activity, nitrogenous group as acceptor; GO:0019202 amino acid kinase activity;	PF02807; PF00217	PF02807 ATP:guanido phosphotransferase, N-terminal domain; PF00217 ATP:guanido phosphotransferase, C-terminal catalytic domain	PF00217 ATP:guanido phosphotransferase, C-terminal catalytic domain	C	KOG3581	Creatine kinases
CGIg02792	11	S	0.375609	0.00046333	O15990 KARG_LIOJA Arginine kinase OS=Liolophura japonica OX=13599 PE=2 SV=1	--	_HYIEQLES[Phospho (STY)]FNKR_	1	Up	0.605389	0.574918	0.629571	1.33665	1.7084	1.77347	0.101602	0.298326	0.0752861	1.70701	1.5517	1.66456	cytoplasm	K00934	E2.7.3.3; arginine kinase [EC:2.7.3.3]	map00330 Arginine and proline metabolism	GO:0006793 phosphorus metabolic process; GO:0006796 phosphate-containing compound metabolic process; GO:0008152 metabolic process; GO:0009987 cellular process; GO:0016310 phosphorylation; GO:0044237 cellular metabolic process;		GO:0003824 catalytic activity; GO:0004054 arginine kinase activity; GO:0016301 kinase activity; GO:0016740 transferase activity; GO:0016772 transferase activity, transferring phosphorus-containing groups; GO:0016775 phosphotransferase activity, nitrogenous group as acceptor; GO:0019202 amino acid kinase activity;	PF02807; PF00217	PF02807 ATP:guanido phosphotransferase, N-terminal domain; PF00217 ATP:guanido phosphotransferase, C-terminal catalytic domain		C	KOG3581	Creatine kinases
CGIg02818	195	S	0.501615	0.00335006	Q6DRG7 MYPT1_DANRE Protein phosphatase 1 regulatory subunit 12A OS=Danio rerio OX=7955 GN=ppp1r12a PE=2 SV=2	ppp1r12a	_KLS[Phospho (STY)]EYEEELK_	1	Up	0.646501	0.824446	0.666563	1.22582	1.61494	1.42049	0.558542	0.639159	0.544079	1.1017	0.78614	1.26189	nucleus	K06270	PPP1R12A, MYPT1; protein phosphatase 1 regulatory subunit 12A	map04022 cGMP-PKG signaling pathway; map04024 cAMP signaling pathway; map04270 Vascular smooth muscle contraction; map04510 Focal adhesion; map04611 Platelet activation; map04810 Regulation of actin cytoskeleton; map04921 Oxytocin signaling pathway	GO:0000226 microtubule cytoskeleton organization; GO:0000278 mitotic cell cycle; GO:0000902 cell morphogenesis; GO:0001889 liver development; GO:0002009 morphogenesis of an epithelium; GO:0003002 regionalization; GO:0003401 axis elongation; GO:0006355 regulation of DNA-templated transcription; GO:0006357 regulation of transcription by RNA polymerase II; GO:0006470 protein dephosphorylation; GO:00…	GO:0000775 chromosome, centromeric region; GO:0000776 kinetochore; GO:0005622 intracellular anatomical structure; GO:0005634 nucleus; GO:0005654 nucleoplasm; GO:0005694 chromosome; GO:0005737 cytoplasm; GO:0005813 centrosome; GO:0005815 microtubule organizing center; GO:0005829 cytosol; GO:0005856 cytoskeleton; GO:0008287 protein serine/threonine phosphatase complex; GO:0015629 actin cytoskeleton…	GO:0003824 catalytic activity; GO:0004721 phosphoprotein phosphatase activity; GO:0004857 enzyme inhibitor activity; GO:0005488 binding; GO:0005515 protein binding; GO:0016787 hydrolase activity; GO:0016788 hydrolase activity, acting on ester bonds; GO:0016791 phosphatase activity; GO:0019208 phosphatase regulator activity; GO:0019899 enzyme binding; GO:0019900 kinase binding; GO:0019901 protein …				OT	KOG0505	Myosin phosphatase, regulatory subunit
CGIg02818	82	S	0.31348	0.000483826	Q6DRG7 MYPT1_DANRE Protein phosphatase 1 regulatory subunit 12A OS=Danio rerio OX=7955 GN=ppp1r12a PE=2 SV=2	ppp1r12a	_YPS[Phospho (STY)]TPDVSDR_	0.999994	Up	0.916191	1.12192	0.907002	3.00465	3.66498	2.72527	0.380686	0.329003	0.570709	1.3171	1.29911	1.35515	nucleus	K06270	PPP1R12A, MYPT1; protein phosphatase 1 regulatory subunit 12A	map04022 cGMP-PKG signaling pathway; map04024 cAMP signaling pathway; map04270 Vascular smooth muscle contraction; map04510 Focal adhesion; map04611 Platelet activation; map04810 Regulation of actin cytoskeleton; map04921 Oxytocin signaling pathway	GO:0000226 microtubule cytoskeleton organization; GO:0000278 mitotic cell cycle; GO:0000902 cell morphogenesis; GO:0001889 liver development; GO:0002009 morphogenesis of an epithelium; GO:0003002 regionalization; GO:0003401 axis elongation; GO:0006355 regulation of DNA-templated transcription; GO:0006357 regulation of transcription by RNA polymerase II; GO:0006470 protein dephosphorylation; GO:00…	GO:0000775 chromosome, centromeric region; GO:0000776 kinetochore; GO:0005622 intracellular anatomical structure; GO:0005634 nucleus; GO:0005654 nucleoplasm; GO:0005694 chromosome; GO:0005737 cytoplasm; GO:0005813 centrosome; GO:0005815 microtubule organizing center; GO:0005829 cytosol; GO:0005856 cytoskeleton; GO:0008287 protein serine/threonine phosphatase complex; GO:0015629 actin cytoskeleton…	GO:0003824 catalytic activity; GO:0004721 phosphoprotein phosphatase activity; GO:0004857 enzyme inhibitor activity; GO:0005488 binding; GO:0005515 protein binding; GO:0016787 hydrolase activity; GO:0016788 hydrolase activity, acting on ester bonds; GO:0016791 phosphatase activity; GO:0019208 phosphatase regulator activity; GO:0019899 enzyme binding; GO:0019900 kinase binding; GO:0019901 protein …				OT	KOG0505	Myosin phosphatase, regulatory subunit
CGIg02820	817	S	0.210018	0.000383024	Q9DBR7 MYPT1_MOUSE Protein phosphatase 1 regulatory subunit 12A OS=Mus musculus OX=10090 GN=Ppp1r12a PE=1 SV=2	Ppp1r12a	_ITS[Phospho (STY)]ENDTIALR_	0.999434	Up	0.40886	0.637663	0.464335	2.47202	2.57038	2.15154	0.676539	0.581602	0.689531	1.2257	1.24603	1.38277	nucleus	K06270	PPP1R12A, MYPT1; protein phosphatase 1 regulatory subunit 12A	map04022 cGMP-PKG signaling pathway; map04024 cAMP signaling pathway; map04270 Vascular smooth muscle contraction; map04510 Focal adhesion; map04611 Platelet activation; map04810 Regulation of actin cytoskeleton; map04921 Oxytocin signaling pathway	GO:0000003 reproduction; GO:0000902 cell morphogenesis; GO:0001700 embryonic development via the syncytial blastoderm; GO:0002009 morphogenesis of an epithelium; GO:0002165 instar larval or pupal development; GO:0003006 developmental process involved in reproduction; GO:0007275 multicellular organism development; GO:0007276 gamete generation; GO:0007281 germ cell development; GO:0007292 female ga…	GO:0005622 intracellular anatomical structure; GO:0005737 cytoplasm; GO:0005911 cell-cell junction; GO:0005912 adherens junction; GO:0005938 cell cortex; GO:0030054 cell junction; GO:0045177 apical part of cell; GO:0045179 apical cortex; GO:0070161 anchoring junction; GO:0071944 cell periphery; GO:0099568 cytoplasmic region; GO:0099738 cell cortex region;					OT	KOG0505	Myosin phosphatase, regulatory subunit
CGIg02846	86	T	0.112347	0.0216917	O88450 DEAF1_RAT Deformed epidermal autoregulatory factor 1 homolog OS=Rattus norvegicus OX=10116 GN=Deaf1 PE=1 SV=1	Deaf1	_TTHIVIHDQTFDSGLKTPT[Phospho (STY)]T[Phospho (STY)]PLPPPTPATPLSR_	0.999998	Up	0.293735	0.273216		1.41093	4.47948	1.67921				1.92836	5.20729	1.36155	nucleus	K23041	DEAF1; deformed epidermal autoregulatory factor 1		GO:0000003 reproduction; GO:0000122 negative regulation of transcription by RNA polymerase II; GO:0001501 skeletal system development; GO:0001662 behavioral fear response; GO:0001838 embryonic epithelial tube formation; GO:0001841 neural tube formation; GO:0001843 neural tube closure; GO:0002009 morphogenesis of an epithelium; GO:0002209 behavioral defense response; GO:0002682 regulation of immun…	GO:0001650 fibrillar center; GO:0005576 extracellular region; GO:0005622 intracellular anatomical structure; GO:0005634 nucleus; GO:0005667 transcription regulator complex; GO:0005694 chromosome; GO:0005700 polytene chromosome; GO:0005730 nucleolus; GO:0005737 cytoplasm; GO:0031974 membrane-enclosed lumen; GO:0031981 nuclear lumen; GO:0032991 protein-containing complex; GO:0043226 organelle; GO:0…	GO:0000976 transcription cis-regulatory region binding; GO:0000977 RNA polymerase II transcription regulatory region sequence-specific DNA binding; GO:0000981 DNA-binding transcription factor activity, RNA polymerase II-specific; GO:0001067 transcription regulatory region nucleic acid binding; GO:0001227 DNA-binding transcription repressor activity, RNA polymerase II-specific; GO:0003676 nucleic …				DK	KOG4333	Nuclear DEAF-1 related transcriptional regulator (suppressin) and related SAND domain proteins
CGIg02846	85	T	0.0760914	0.0218467	O88450 DEAF1_RAT Deformed epidermal autoregulatory factor 1 homolog OS=Rattus norvegicus OX=10116 GN=Deaf1 PE=1 SV=1	Deaf1	_TTHIVIHDQTFDSGLKTPT[Phospho (STY)]T[Phospho (STY)]PLPPPTPATPLSR_	0.999982	Up	0.248592	0.267029		2.09386	6.42946	1.64119				1.64164	3.67813	0.981495	nucleus	K23041	DEAF1; deformed epidermal autoregulatory factor 1		GO:0000003 reproduction; GO:0000122 negative regulation of transcription by RNA polymerase II; GO:0001501 skeletal system development; GO:0001662 behavioral fear response; GO:0001838 embryonic epithelial tube formation; GO:0001841 neural tube formation; GO:0001843 neural tube closure; GO:0002009 morphogenesis of an epithelium; GO:0002209 behavioral defense response; GO:0002682 regulation of immun…	GO:0001650 fibrillar center; GO:0005576 extracellular region; GO:0005622 intracellular anatomical structure; GO:0005634 nucleus; GO:0005667 transcription regulator complex; GO:0005694 chromosome; GO:0005700 polytene chromosome; GO:0005730 nucleolus; GO:0005737 cytoplasm; GO:0031974 membrane-enclosed lumen; GO:0031981 nuclear lumen; GO:0032991 protein-containing complex; GO:0043226 organelle; GO:0…	GO:0000976 transcription cis-regulatory region binding; GO:0000977 RNA polymerase II transcription regulatory region sequence-specific DNA binding; GO:0000981 DNA-binding transcription factor activity, RNA polymerase II-specific; GO:0001067 transcription regulatory region nucleic acid binding; GO:0001227 DNA-binding transcription repressor activity, RNA polymerase II-specific; GO:0003676 nucleic …				DK	KOG4333	Nuclear DEAF-1 related transcriptional regulator (suppressin) and related SAND domain proteins
CGIg02872	98	S	0.390253	0.000769395	XP_011427205.2 uncharacterized protein LOC105328132 [Crassostrea gigas]	--	_KPS[Phospho (STY)]MEQIVR_	1	Up	0.682944	0.640055	0.610573	1.94103	1.3933	1.62033	0.520879	0.637934	0.517254	1.80868	1.5209	1.28387	nucleus
CGIg02891	1875	S	0.453709	0.00762446	Q9UKK3 PARP4_HUMAN Protein mono-ADP-ribosyltransferase PARP4 OS=Homo sapiens OX=9606 GN=PARP4 PE=1 SV=3	PARP4	_QNLAS[Phospho (STY)]PDWK_	1	Up	0.502664	0.611829	0.359802	1.19046	1.05512	1.00384	0.465648	0.71284	0.629099	1.02017	1.30518	1.36218	endoplasmic reticulum,mitochondria	K10798	PARP2_3_4; poly [ADP-ribose] polymerase 2/3/4 [EC:2.4.2.30]	map03410 Base excision repair; map04210 Apoptosis; map04212 Longevity regulating pathway - worm	GO:0006139 nucleobase-containing compound metabolic process; GO:0006259 DNA metabolic process; GO:0006281 DNA repair; GO:0006725 cellular aromatic compound metabolic process; GO:0006807 nitrogen compound metabolic process; GO:0006950 response to stress; GO:0006952 defense response; GO:0006954 inflammatory response; GO:0006974 DNA damage response; GO:0008152 metabolic process; GO:0008219 cell deat…	GO:0005622 intracellular anatomical structure; GO:0005634 nucleus; GO:0005737 cytoplasm; GO:0005819 spindle; GO:0005829 cytosol; GO:0005856 cytoskeleton; GO:0005874 microtubule; GO:0005876 spindle microtubule; GO:0015630 microtubule cytoskeleton; GO:0032991 protein-containing complex; GO:0043226 organelle; GO:0043227 membrane-bounded organelle; GO:0043228 non-membrane-bounded organelle; GO:004322…	GO:0003676 nucleic acid binding; GO:0003677 DNA binding; GO:0003824 catalytic activity; GO:0003950 NAD+ ADP-ribosyltransferase activity; GO:0005488 binding; GO:0005515 protein binding; GO:0016740 transferase activity; GO:0016757 glycosyltransferase activity; GO:0016763 pentosyltransferase activity; GO:0019899 enzyme binding; GO:0097159 organic cyclic compound binding; GO:1901363 heterocyclic comp…	PF13768	PF13768 von Willebrand factor type A domain		KLO	KOG1037	NAD+ ADP-ribosyltransferase Parp, required for poly-ADP ribosylation of nuclear proteins
CGIg02965	1167	S	0.650227	0.00199318	Q502W6 VWA3B_HUMAN von Willebrand factor A domain-containing protein 3B OS=Homo sapiens OX=9606 GN=VWA3B PE=1 SV=3	VWA3B	_IKVS[Phospho (STY)]DQHLALLR_	1	Up	0.744446	0.71784	0.776074	1.23639	1.17783	1.02821	0.642968	0.636218	0.727836	1.20286	1.13244	1.26546	cytoplasm							PF13768; PF15057	PF13768 von Willebrand factor type A domain; PF15057 Domain of unknown function (DUF4537)
CGIg02965	1122	S	0.481703	0.0177105	Q502W6 VWA3B_HUMAN von Willebrand factor A domain-containing protein 3B OS=Homo sapiens OX=9606 GN=VWA3B PE=1 SV=3	VWA3B	_WDGVHS[Phospho (STY)]R_	1	Up	0.564535	0.909563	1.00153	1.59305	1.99031	1.55595		0.471402	0.417956	1.36682	1.62192	1.5978	cytoplasm							PF13768; PF15057	PF13768 von Willebrand factor type A domain; PF15057 Domain of unknown function (DUF4537)
CGIg02965	984	S	0.2725	0.00216776	Q502W6 VWA3B_HUMAN von Willebrand factor A domain-containing protein 3B OS=Homo sapiens OX=9606 GN=VWA3B PE=1 SV=3	VWA3B	_PMSADS[Phospho (STY)]KEAAR_	1	Up	0.574534	0.352854	0.312458	1.42344	1.49997	1.62648	0.315121	0.311907	0.791165	2.03958	2.16817	2.07127	cytoplasm							PF13768; PF15057	PF13768 von Willebrand factor type A domain; PF15057 Domain of unknown function (DUF4537)
CGIg02971	967	S	0.594765	0.00704554	Q6WQJ1 DGLA_MOUSE Diacylglycerol lipase-alpha OS=Mus musculus OX=10090 GN=Dagla PE=1 SV=2	Dagla	_IQS[Phospho (STY)]TC[Carbamidomethyl (C)]QYK_	0.999994	Up	0.87202	1.1228	0.912959	1.83663	1.46105	1.59128	1.70691	0.902526	1.55738	2.15551	1.18176	1.49561	plasma membrane	K13806	DAGL; sn1-specific diacylglycerol lipase [EC:3.1.1.116]	map04723 Retrograde endocannabinoid signaling; map04745 Phototransduction - fly; map04925 Aldosterone synthesis and secretion	GO:0001676 long-chain fatty acid metabolic process; GO:0006082 organic acid metabolic process; GO:0006629 lipid metabolic process; GO:0006631 fatty acid metabolic process; GO:0006638 neutral lipid metabolic process; GO:0006639 acylglycerol metabolic process; GO:0006690 icosanoid metabolic process; GO:0006950 response to stress; GO:0006979 response to oxidative stress; GO:0007154 cell communicatio…	GO:0005622 intracellular anatomical structure; GO:0005737 cytoplasm; GO:0005886 plasma membrane; GO:0016020 membrane; GO:0030424 axon; GO:0042995 cell projection; GO:0043005 neuron projection; GO:0043196 varicosity; GO:0044304 main axon; GO:0045202 synapse; GO:0045211 postsynaptic membrane; GO:0071944 cell periphery; GO:0097060 synaptic membrane; GO:0098590 plasma membrane region; GO:0098794 post…	GO:0003824 catalytic activity; GO:0004465 lipoprotein lipase activity; GO:0004806 triglyceride lipase activity; GO:0016298 lipase activity; GO:0016787 hydrolase activity; GO:0016788 hydrolase activity, acting on ester bonds; GO:0047372 acylglycerol lipase activity; GO:0052689 carboxylic ester hydrolase activity;				IOT	KOG2088	Predicted lipase/calmodulin-binding heat-shock protein
CGIg02991	153	S	0.260221	0.00312189	XP_011416423.2 E3 ubiquitin-protein ligase XIAP [Crassostrea gigas]	--	_DEKPS[Phospho (STY)]PEAIAK_	1	Up	0.451136		0.410302	1.41544	1.50198	2.0482	0.331931	0.0524244	0.0613414	1.5994	1.70714	1.27294	cytoplasm	K16061	BIRC7_8; baculoviral IAP repeat-containing protein 7/8	map04120 Ubiquitin mediated proteolysis; map04215 Apoptosis - multiple species	GO:0000165 MAPK cascade; GO:0000209 protein polyubiquitination; GO:0001932 regulation of protein phosphorylation; GO:0001934 positive regulation of protein phosphorylation; GO:0002225 positive regulation of antimicrobial peptide production; GO:0002682 regulation of immune system process; GO:0002684 positive regulation of immune system process; GO:0002697 regulation of immune effector process; GO:…	GO:0005622 intracellular anatomical structure; GO:0005634 nucleus; GO:0005737 cytoplasm; GO:0005794 Golgi apparatus; GO:0005815 microtubule organizing center; GO:0005829 cytosol; GO:0005856 cytoskeleton; GO:0012505 endomembrane system; GO:0015630 microtubule cytoskeleton; GO:0043226 organelle; GO:0043227 membrane-bounded organelle; GO:0043228 non-membrane-bounded organelle; GO:0043229 intracellul…	GO:0002020 protease binding; GO:0003824 catalytic activity; GO:0004842 ubiquitin-protein transferase activity; GO:0004857 enzyme inhibitor activity; GO:0004866 endopeptidase inhibitor activity; GO:0004869 cysteine-type endopeptidase inhibitor activity; GO:0005488 binding; GO:0005515 protein binding; GO:0008270 zinc ion binding; GO:0016740 transferase activity; GO:0019787 ubiquitin-like protein tr…	PF00653	PF00653 Inhibitor of Apoptosis domain	PF00653 Inhibitor of Apoptosis domain	DR	KOG1101	Apoptosis inhibitor IAP1 and related BIR domain proteins
CGIg03005	319	S	0.0762637	3.68407e-05	Q6NVF0 OCRL_MOUSE Inositol polyphosphate 5-phosphatase OCRL OS=Mus musculus OX=10090 GN=Ocrl PE=1 SV=1	Ocrl	_LITNQLGIPGS[Phospho (STY)]GVELVNNLKPTTMR_	1	Up	0.178679	0.215604	0.169811	2.66765	2.75376	1.97522	0.470604	0.216719	0.487791	0.92072	2.75239	0.917077	cytoplasm	K01099	INPP5B_F; inositol polyphosphate 5-phosphatase INPP5B/F [EC:3.1.3.36]	map00562 Inositol phosphate metabolism; map01100 Metabolic pathways; map04070 Phosphatidylinositol signaling system	GO:0000003 reproduction; GO:0000278 mitotic cell cycle; GO:0000281 mitotic cytokinesis; GO:0000910 cytokinesis; GO:0001701 in utero embryonic development; GO:0006066 alcohol metabolic process; GO:0006629 lipid metabolic process; GO:0006644 phospholipid metabolic process; GO:0006650 glycerophospholipid metabolic process; GO:0006661 phosphatidylinositol biosynthetic process; GO:0006793 phosphorus m…	GO:0001750 photoreceptor outer segment; GO:0005622 intracellular anatomical structure; GO:0005634 nucleus; GO:0005737 cytoplasm; GO:0005768 endosome; GO:0005769 early endosome; GO:0005770 late endosome; GO:0005794 Golgi apparatus; GO:0005795 Golgi stack; GO:0005798 Golgi-associated vesicle; GO:0005802 trans-Golgi network; GO:0005829 cytosol; GO:0005886 plasma membrane; GO:0005929 cilium; GO:00125…	GO:0003824 catalytic activity; GO:0004439 phosphatidylinositol-4,5-bisphosphate 5-phosphatase activity; GO:0004445 inositol-polyphosphate 5-phosphatase activity; GO:0005096 GTPase activator activity; GO:0005488 binding; GO:0005515 protein binding; GO:0008047 enzyme activator activity; GO:0016787 hydrolase activity; GO:0016788 hydrolase activity, acting on ester bonds; GO:0016791 phosphatase activ…	PF16776; PF03372; PF00620	PF16776 Type II inositol 1,4,5-trisphosphate 5-phosphatase PH domain; PF03372 Endonuclease/Exonuclease/phosphatase family; PF00620 RhoGAP domain		U	KOG0565	Inositol polyphosphate 5-phosphatase and related proteins
CGIg03010	484	S	0.584874	0.000806744	B4JSC2 FOXO_DROGR Forkhead box protein O OS=Drosophila grimshawi OX=7222 GN=foxo PE=3 SV=1	foxo	_SPS[Phospho (STY)]GSSQPSLLQR_	1	Up	0.809142	0.906018	0.764587	1.39472	1.49891	1.34616	1.15436	1.1476	1.37955	1.55783	1.44131	1.20685	nucleus	K09408	FOXO3; forkhead box protein O3	map04062 Chemokine signaling pathway; map04068 FoxO signaling pathway; map04137 Mitophagy - animal; map04151 PI3K-Akt signaling pathway; map04152 AMPK signaling pathway; map04211 Longevity regulating pathway; map04212 Longevity regulating pathway - worm; map04213 Longevity regulating pathway - multiple species; map04218 Cellular senescence; map04361 Axon regeneration; map04722 Neurotrophin signal…	GO:0000122 negative regulation of transcription by RNA polymerase II; GO:0002119 nematode larval development; GO:0002164 larval development; GO:0002376 immune system process; GO:0002682 regulation of immune system process; GO:0002684 positive regulation of immune system process; GO:0002819 regulation of adaptive immune response; GO:0002821 positive regulation of adaptive immune response; GO:00028…	GO:0005622 intracellular anatomical structure; GO:0005634 nucleus; GO:0005737 cytoplasm; GO:0005829 cytosol; GO:0043226 organelle; GO:0043227 membrane-bounded organelle; GO:0043229 intracellular organelle; GO:0043231 intracellular membrane-bounded organelle;	GO:0000976 transcription cis-regulatory region binding; GO:0000977 RNA polymerase II transcription regulatory region sequence-specific DNA binding; GO:0001067 transcription regulatory region nucleic acid binding; GO:0002020 protease binding; GO:0003676 nucleic acid binding; GO:0003677 DNA binding; GO:0003690 double-stranded DNA binding; GO:0003700 DNA-binding transcription factor activity; GO:000…	PF00250	PF00250 Forkhead domain		K	KOG2294	Transcription factor of the Forkhead/HNF3 family
CGIg03010	436	S	0.475978	0.000903519	B4JSC2 FOXO_DROGR Forkhead box protein O OS=Drosophila grimshawi OX=7222 GN=foxo PE=3 SV=1	foxo	_S[Phospho (STY)]PQQQVSPNFNNR_	1	Up	0.744786	0.715875	0.59617	1.43108	1.56715	1.32305	0.407351	0.391048	0.428202	1.7014	1.47338	1.86879	nucleus	K09408	FOXO3; forkhead box protein O3	map04062 Chemokine signaling pathway; map04068 FoxO signaling pathway; map04137 Mitophagy - animal; map04151 PI3K-Akt signaling pathway; map04152 AMPK signaling pathway; map04211 Longevity regulating pathway; map04212 Longevity regulating pathway - worm; map04213 Longevity regulating pathway - multiple species; map04218 Cellular senescence; map04361 Axon regeneration; map04722 Neurotrophin signal…	GO:0000122 negative regulation of transcription by RNA polymerase II; GO:0002119 nematode larval development; GO:0002164 larval development; GO:0002376 immune system process; GO:0002682 regulation of immune system process; GO:0002684 positive regulation of immune system process; GO:0002819 regulation of adaptive immune response; GO:0002821 positive regulation of adaptive immune response; GO:00028…	GO:0005622 intracellular anatomical structure; GO:0005634 nucleus; GO:0005737 cytoplasm; GO:0005829 cytosol; GO:0043226 organelle; GO:0043227 membrane-bounded organelle; GO:0043229 intracellular organelle; GO:0043231 intracellular membrane-bounded organelle;	GO:0000976 transcription cis-regulatory region binding; GO:0000977 RNA polymerase II transcription regulatory region sequence-specific DNA binding; GO:0001067 transcription regulatory region nucleic acid binding; GO:0002020 protease binding; GO:0003676 nucleic acid binding; GO:0003677 DNA binding; GO:0003690 double-stranded DNA binding; GO:0003700 DNA-binding transcription factor activity; GO:000…	PF00250	PF00250 Forkhead domain		K	KOG2294	Transcription factor of the Forkhead/HNF3 family
CGIg03011	2301	S	0.35528	0.000172296	O15078 CE290_HUMAN Centrosomal protein of 290 kDa OS=Homo sapiens OX=9606 GN=CEP290 PE=1 SV=2	CEP290	_ERPGS[Phospho (STY)]STNMDSK_	0.999988	Up		0.502542	0.49032	1.30529	1.44847	1.43813	0.0976124	0.522996	0.450317	1.52073	1.42926	1.58405	nucleus	K16533	CEP290, NPHP6; centrosomal protein CEP290		GO:0000086 G2/M transition of mitotic cell cycle; GO:0000278 mitotic cell cycle; GO:0001654 eye development; GO:0001655 urogenital system development; GO:0001754 eye photoreceptor cell differentiation; GO:0001775 cell activation; GO:0001822 kidney development; GO:0001894 tissue homeostasis; GO:0001895 retina homeostasis; GO:0002009 morphogenesis of an epithelium; GO:0002252 immune effector proces…	GO:0001750 photoreceptor outer segment; GO:0005576 extracellular region; GO:0005622 intracellular anatomical structure; GO:0005634 nucleus; GO:0005737 cytoplasm; GO:0005813 centrosome; GO:0005814 centriole; GO:0005815 microtubule organizing center; GO:0005829 cytosol; GO:0005856 cytoskeleton; GO:0005929 cilium; GO:0012505 endomembrane system; GO:0015630 microtubule cytoskeleton; GO:0030141 secret…	GO:0005488 binding; GO:0005515 protein binding; GO:0042802 identical protein binding;
CGIg03023	417	S	0.508742	0.00755307	Q4KLN7 ARFG3_RAT ADP-ribosylation factor GTPase-activating protein 3 OS=Rattus norvegicus OX=10116 GN=Arfgap3 PE=1 SV=1	Arfgap3	_S[Phospho (STY)]GSWDIDR_	0.993116	Up	0.660362	0.696353	0.509837	1.30931	1.35673	1.00291	0.35707			1.28743	2.14476	1.23943	nucleus	K12493	ARFGAP2_3; ADP-ribosylation factor GTPase-activating protein 2/3	map04144 Endocytosis	GO:0001654 eye development; GO:0001745 compound eye morphogenesis; GO:0002790 peptide secretion; GO:0006810 transport; GO:0006886 intracellular protein transport; GO:0006888 endoplasmic reticulum to Golgi vesicle-mediated transport; GO:0006890 retrograde vesicle-mediated transport, Golgi to endoplasmic reticulum; GO:0007275 multicellular organism development; GO:0007423 sensory organ development;…	GO:0005622 intracellular anatomical structure; GO:0005737 cytoplasm; GO:0005794 Golgi apparatus; GO:0005829 cytosol; GO:0005886 plasma membrane; GO:0012505 endomembrane system; GO:0016020 membrane; GO:0043226 organelle; GO:0043227 membrane-bounded organelle; GO:0043229 intracellular organelle; GO:0043231 intracellular membrane-bounded organelle; GO:0071944 cell periphery;	GO:0005096 GTPase activator activity; GO:0005215 transporter activity; GO:0005488 binding; GO:0005515 protein binding; GO:0008047 enzyme activator activity; GO:0030234 enzyme regulator activity; GO:0030695 GTPase regulator activity; GO:0060589 nucleoside-triphosphatase regulator activity; GO:0098772 molecular function regulator activity;	PF01412	PF01412 Putative GTPase activating protein for Arf		T	KOG0706	Predicted GTPase-activating protein
CGIg03038	310	T	0.338818	0.000568857	Q6IRN2 QKIB_XENLA Protein quaking-B OS=Xenopus laevis OX=8355 GN=qki-b PE=1 SV=1	qki-b	_SPT[Phospho (STY)]PAGAPLILAPR_	1	Up	0.558456	0.580835	0.602062	1.55939	1.49269	2.08741	0.676517	0.723255	0.904844	1.66922	2.06631	1.85484	cytoplasm,nucleus	K14945	QKI; protein quaking		GO:0000003 reproduction; GO:0000381 regulation of alternative mRNA splicing, via spliceosome; GO:0001568 blood vessel development; GO:0001570 vasculogenesis; GO:0001667 ameboidal-type cell migration; GO:0001676 long-chain fatty acid metabolic process; GO:0001709 cell fate determination; GO:0001742 oenocyte differentiation; GO:0001944 vasculature development; GO:0002009 morphogenesis of an epithel…	GO:0005622 intracellular anatomical structure; GO:0005634 nucleus; GO:0005737 cytoplasm; GO:0032991 protein-containing complex; GO:0035770 ribonucleoprotein granule; GO:0036464 cytoplasmic ribonucleoprotein granule; GO:0043186 P granule; GO:0043226 organelle; GO:0043227 membrane-bounded organelle; GO:0043228 non-membrane-bounded organelle; GO:0043229 intracellular organelle; GO:0043231 intracellu…	GO:0003676 nucleic acid binding; GO:0003723 RNA binding; GO:0003727 single-stranded RNA binding; GO:0003729 mRNA binding; GO:0003730 mRNA 3'-UTR binding; GO:0005488 binding; GO:0005515 protein binding; GO:0036002 pre-mRNA binding; GO:0097157 pre-mRNA intronic binding; GO:0097159 organic cyclic compound binding; GO:1901363 heterocyclic compound binding;	PF16544; PF00013	PF16544 Homodimerisation region of STAR domain protein; PF00013 KH domain		A	KOG1588	RNA-binding protein Sam68 and related KH domain proteins
CGIg03038	297	S	0.294404	8.10867e-05	Q6IRN2 QKIB_XENLA Protein quaking-B OS=Xenopus laevis OX=8355 GN=qki-b PE=1 SV=1	qki-b	_FLTAAS[Phospho (STY)]PLTAGISQLR_	1	Up	0.478231	0.374333	0.445642	1.52103	1.45305	1.43552	0.551777	0.538247	0.426503	1.88134	1.57772	1.75963	cytoplasm,nucleus	K14945	QKI; protein quaking		GO:0000003 reproduction; GO:0000381 regulation of alternative mRNA splicing, via spliceosome; GO:0001568 blood vessel development; GO:0001570 vasculogenesis; GO:0001667 ameboidal-type cell migration; GO:0001676 long-chain fatty acid metabolic process; GO:0001709 cell fate determination; GO:0001742 oenocyte differentiation; GO:0001944 vasculature development; GO:0002009 morphogenesis of an epithel…	GO:0005622 intracellular anatomical structure; GO:0005634 nucleus; GO:0005737 cytoplasm; GO:0032991 protein-containing complex; GO:0035770 ribonucleoprotein granule; GO:0036464 cytoplasmic ribonucleoprotein granule; GO:0043186 P granule; GO:0043226 organelle; GO:0043227 membrane-bounded organelle; GO:0043228 non-membrane-bounded organelle; GO:0043229 intracellular organelle; GO:0043231 intracellu…	GO:0003676 nucleic acid binding; GO:0003723 RNA binding; GO:0003727 single-stranded RNA binding; GO:0003729 mRNA binding; GO:0003730 mRNA 3'-UTR binding; GO:0005488 binding; GO:0005515 protein binding; GO:0036002 pre-mRNA binding; GO:0097157 pre-mRNA intronic binding; GO:0097159 organic cyclic compound binding; GO:1901363 heterocyclic compound binding;	PF16544; PF00013	PF16544 Homodimerisation region of STAR domain protein; PF00013 KH domain		A	KOG1588	RNA-binding protein Sam68 and related KH domain proteins
CGIg03045	603	T	0.424429	0.032693	Q8VHE0 SEC63_MOUSE Translocation protein SEC63 homolog OS=Mus musculus OX=10090 GN=Sec63 PE=1 SV=4	Sec63	_GAET[Phospho (STY)]DEET[Phospho (STY)]NAS[Phospho (STY)]EGEDQREDR_	1	Up	0.639061	0.264878	0.608872	1.22773	1.08479	1.25183	0.853218	0.582198	0.708737	1.28017	1.11396	1.13677	plasma membrane	K09540	SEC63, DNAJC23; translocation protein SEC63	map03060 Protein export; map04141 Protein processing in endoplasmic reticulum	GO:0001655 urogenital system development; GO:0001889 liver development; GO:0006605 protein targeting; GO:0006612 protein targeting to membrane; GO:0006613 cotranslational protein targeting to membrane; GO:0006614 SRP-dependent cotranslational protein targeting to membrane; GO:0006620 post-translational protein targeting to endoplasmic reticulum membrane; GO:0006807 nitrogen compound metabolic pro…	GO:0005622 intracellular anatomical structure; GO:0005737 cytoplasm; GO:0005783 endoplasmic reticulum; GO:0005789 endoplasmic reticulum membrane; GO:0005829 cytosol; GO:0012505 endomembrane system; GO:0016020 membrane; GO:0031984 organelle subcompartment; GO:0042175 nuclear outer membrane-endoplasmic reticulum membrane network; GO:0043226 organelle; GO:0043227 membrane-bounded organelle; GO:00432…	GO:0038023 signaling receptor activity; GO:0060089 molecular transducer activity;	PF00226	PF00226 DnaJ domain		O	KOG0721	Molecular chaperone (DnaJ superfamily)
CGIg03045	599	T	0.389803	0.00604809	Q8VHE0 SEC63_MOUSE Translocation protein SEC63 homolog OS=Mus musculus OX=10090 GN=Sec63 PE=1 SV=4	Sec63	_GAET[Phospho (STY)]DEETNASEGEDQR_	1	Up	0.572835	0.380975	0.537848	1.59324	1.04936	1.1841	0.793358	0.735899	0.659795	0.798968	0.707416	0.743329	plasma membrane	K09540	SEC63, DNAJC23; translocation protein SEC63	map03060 Protein export; map04141 Protein processing in endoplasmic reticulum	GO:0001655 urogenital system development; GO:0001889 liver development; GO:0006605 protein targeting; GO:0006612 protein targeting to membrane; GO:0006613 cotranslational protein targeting to membrane; GO:0006614 SRP-dependent cotranslational protein targeting to membrane; GO:0006620 post-translational protein targeting to endoplasmic reticulum membrane; GO:0006807 nitrogen compound metabolic pro…	GO:0005622 intracellular anatomical structure; GO:0005737 cytoplasm; GO:0005783 endoplasmic reticulum; GO:0005789 endoplasmic reticulum membrane; GO:0005829 cytosol; GO:0012505 endomembrane system; GO:0016020 membrane; GO:0031984 organelle subcompartment; GO:0042175 nuclear outer membrane-endoplasmic reticulum membrane network; GO:0043226 organelle; GO:0043227 membrane-bounded organelle; GO:00432…	GO:0038023 signaling receptor activity; GO:0060089 molecular transducer activity;	PF00226	PF00226 DnaJ domain		O	KOG0721	Molecular chaperone (DnaJ superfamily)
CGIg03045	606	S	0.236677	0.0078033	Q8VHE0 SEC63_MOUSE Translocation protein SEC63 homolog OS=Mus musculus OX=10090 GN=Sec63 PE=1 SV=4	Sec63	_GAET[Phospho (STY)]DEET[Phospho (STY)]NAS[Phospho (STY)]EGEDQREDR_	1	Up	0.421275	0.17461	0.401374	1.64148	1.14816	1.42395	0.562449	0.38379	0.467206	0.8439	0.734331	0.749372	plasma membrane	K09540	SEC63, DNAJC23; translocation protein SEC63	map03060 Protein export; map04141 Protein processing in endoplasmic reticulum	GO:0001655 urogenital system development; GO:0001889 liver development; GO:0006605 protein targeting; GO:0006612 protein targeting to membrane; GO:0006613 cotranslational protein targeting to membrane; GO:0006614 SRP-dependent cotranslational protein targeting to membrane; GO:0006620 post-translational protein targeting to endoplasmic reticulum membrane; GO:0006807 nitrogen compound metabolic pro…	GO:0005622 intracellular anatomical structure; GO:0005737 cytoplasm; GO:0005783 endoplasmic reticulum; GO:0005789 endoplasmic reticulum membrane; GO:0005829 cytosol; GO:0012505 endomembrane system; GO:0016020 membrane; GO:0031984 organelle subcompartment; GO:0042175 nuclear outer membrane-endoplasmic reticulum membrane network; GO:0043226 organelle; GO:0043227 membrane-bounded organelle; GO:00432…	GO:0038023 signaling receptor activity; GO:0060089 molecular transducer activity;	PF00226	PF00226 DnaJ domain		O	KOG0721	Molecular chaperone (DnaJ superfamily)
CGIg03046	7	T	0.0689335	0.00075461	Q6NXD2 CHM2B_DANRE Charged multivesicular body protein 2b OS=Danio rerio OX=7955 GN=chmp2b PE=2 SV=1	chmp2b	_KKPT[Phospho (STY)]VQEQLR_	1	Up	0.216858	0.176051		2.84187	3.49463	2.21325	0.323936		0.176981	1.13281	1.23603	1.02448	nucleus	K12192	CHMP2B; charged multivesicular body protein 2B	map04144 Endocytosis; map04217 Necroptosis	GO:0000070 mitotic sister chromatid segregation; GO:0000278 mitotic cell cycle; GO:0000280 nuclear division; GO:0000819 sister chromatid segregation; GO:0000920 septum digestion after cytokinesis; GO:0003008 system process; GO:0006810 transport; GO:0006914 autophagy; GO:0006996 organelle organization; GO:0006997 nucleus organization; GO:0007032 endosome organization; GO:0007034 vacuolar transport…	GO:0000815 ESCRT III complex; GO:0005622 intracellular anatomical structure; GO:0005737 cytoplasm; GO:0005768 endosome; GO:0005829 cytosol; GO:0010008 endosome membrane; GO:0012505 endomembrane system; GO:0016020 membrane; GO:0031090 organelle membrane; GO:0031410 cytoplasmic vesicle; GO:0031982 vesicle; GO:0032991 protein-containing complex; GO:0036452 ESCRT complex; GO:0043226 organelle; GO:004…	GO:0005488 binding; GO:0005515 protein binding; GO:0019904 protein domain specific binding;				U	KOG3231	Predicted assembly/vacuolar sorting protein
CGIg03130	80	T	0.561123	0.00746429	Q24799 MYPH_ECHGR Myophilin OS=Echinococcus granulosus OX=6210 PE=2 SV=1	--	_YAT[Phospho (STY)]PPTMSFK_	1	Up	0.70721	0.736083	0.525447	1.06567	1.18096	1.26194	0.673415	0.79342	0.740587	0.793908	0.870059	0.819604	cytoplasm	K20526	TAGLN; transgelin		GO:0000122 negative regulation of transcription by RNA polymerase II; GO:0003008 system process; GO:0003012 muscle system process; GO:0006355 regulation of DNA-templated transcription; GO:0006357 regulation of transcription by RNA polymerase II; GO:0006936 muscle contraction; GO:0006939 smooth muscle contraction; GO:0007154 cell communication; GO:0007165 signal transduction; GO:0007275 multicellu…	GO:0005622 intracellular anatomical structure; GO:0005634 nucleus; GO:0005737 cytoplasm; GO:0005856 cytoskeleton; GO:0005865 striated muscle thin filament; GO:0015629 actin cytoskeleton; GO:0030016 myofibril; GO:0030017 sarcomere; GO:0036379 myofilament; GO:0043209 myelin sheath; GO:0043226 organelle; GO:0043227 membrane-bounded organelle; GO:0043228 non-membrane-bounded organelle; GO:0043229 int…	GO:0000976 transcription cis-regulatory region binding; GO:0000977 RNA polymerase II transcription regulatory region sequence-specific DNA binding; GO:0000978 RNA polymerase II cis-regulatory region sequence-specific DNA binding; GO:0000987 cis-regulatory region sequence-specific DNA binding; GO:0001067 transcription regulatory region nucleic acid binding; GO:0003676 nucleic acid binding; GO:0003…	PF00307	PF00307 Calponin homology (CH) domain	PF00307 Calponin homology (CH) domain	Z	KOG2046	Calponin
CGIg03130	32	T	0.253211	0.00130631	Q24799 MYPH_ECHGR Myophilin OS=Echinococcus granulosus OX=6210 PE=2 SV=1	--	_ALT[Phospho (STY)]FISQK_	1	Up		0.279751	0.247935	1.06716	0.88535	1.17346				1.19376	1.23791	1.09456	cytoplasm	K20526	TAGLN; transgelin		GO:0000122 negative regulation of transcription by RNA polymerase II; GO:0003008 system process; GO:0003012 muscle system process; GO:0006355 regulation of DNA-templated transcription; GO:0006357 regulation of transcription by RNA polymerase II; GO:0006936 muscle contraction; GO:0006939 smooth muscle contraction; GO:0007154 cell communication; GO:0007165 signal transduction; GO:0007275 multicellu…	GO:0005622 intracellular anatomical structure; GO:0005634 nucleus; GO:0005737 cytoplasm; GO:0005856 cytoskeleton; GO:0005865 striated muscle thin filament; GO:0015629 actin cytoskeleton; GO:0030016 myofibril; GO:0030017 sarcomere; GO:0036379 myofilament; GO:0043209 myelin sheath; GO:0043226 organelle; GO:0043227 membrane-bounded organelle; GO:0043228 non-membrane-bounded organelle; GO:0043229 int…	GO:0000976 transcription cis-regulatory region binding; GO:0000977 RNA polymerase II transcription regulatory region sequence-specific DNA binding; GO:0000978 RNA polymerase II cis-regulatory region sequence-specific DNA binding; GO:0000987 cis-regulatory region sequence-specific DNA binding; GO:0001067 transcription regulatory region nucleic acid binding; GO:0003676 nucleic acid binding; GO:0003…	PF00307	PF00307 Calponin homology (CH) domain	PF00307 Calponin homology (CH) domain	Z	KOG2046	Calponin
CGIg03130	175	S	0.225461	5.60676e-05	Q24799 MYPH_ECHGR Myophilin OS=Echinococcus granulosus OX=6210 PE=2 SV=1	--	_GANQS[Phospho (STY)]GMNIGNTR_	1	Up	0.43926	0.414167	0.361311	1.62351	1.99162	1.77266	0.840479	0.782302	0.838219	1.96592	1.7388	2.06412	cytoplasm	K20526	TAGLN; transgelin		GO:0000122 negative regulation of transcription by RNA polymerase II; GO:0003008 system process; GO:0003012 muscle system process; GO:0006355 regulation of DNA-templated transcription; GO:0006357 regulation of transcription by RNA polymerase II; GO:0006936 muscle contraction; GO:0006939 smooth muscle contraction; GO:0007154 cell communication; GO:0007165 signal transduction; GO:0007275 multicellu…	GO:0005622 intracellular anatomical structure; GO:0005634 nucleus; GO:0005737 cytoplasm; GO:0005856 cytoskeleton; GO:0005865 striated muscle thin filament; GO:0015629 actin cytoskeleton; GO:0030016 myofibril; GO:0030017 sarcomere; GO:0036379 myofilament; GO:0043209 myelin sheath; GO:0043226 organelle; GO:0043227 membrane-bounded organelle; GO:0043228 non-membrane-bounded organelle; GO:0043229 int…	GO:0000976 transcription cis-regulatory region binding; GO:0000977 RNA polymerase II transcription regulatory region sequence-specific DNA binding; GO:0000978 RNA polymerase II cis-regulatory region sequence-specific DNA binding; GO:0000987 cis-regulatory region sequence-specific DNA binding; GO:0001067 transcription regulatory region nucleic acid binding; GO:0003676 nucleic acid binding; GO:0003…	PF00307	PF00307 Calponin homology (CH) domain		Z	KOG2046	Calponin
CGIg03131	190	S	0.32479	4.77429e-05	Q24799 MYPH_ECHGR Myophilin OS=Echinococcus granulosus OX=6210 PE=2 SV=1	--	_GAS[Phospho (STY)]QAGLNMGK_	1	Up	0.758366	0.62474	0.712109	2.15786	2.21676	2.07636	0.912873	0.733793	0.775825	1.85197	1.84816	1.79064	mitochondria	K20526	TAGLN; transgelin					PF00307	PF00307 Calponin homology (CH) domain		Z	KOG2046	Calponin
CGIg03265	72	T	0.524994	0.0113741	Q39575 DYHG_CHLRE Dynein gamma chain, flagellar outer arm OS=Chlamydomonas reinhardtii OX=3055 GN=ODA2 PE=1 SV=1	ODA2	_ELNVT[Phospho (STY)]GTLAALK_	0.999942	Up	0.478245		0.615167	1.1188	0.936329	1.06894	0.502624	0.914518	0.0962193	0.870794	1.19802	0.701078	cytoplasm,nucleus	K10408	DNAH; dynein axonemal heavy chain					PF12774; PF17852; PF12775; PF17857; PF12780; PF12781; PF03028; PF18198; PF18199	PF12774 Hydrolytic ATP binding site of dynein motor region; PF17852 Dynein heavy chain AAA lid domain; PF12775 P-loop containing dynein motor region; PF17857 AAA+ lid domain; PF12780 P-loop containing dynein motor region D4; PF12781 ATP-binding dynein motor region; PF03028 Dynein heavy chain region D6 P-loop domain ; PF18198 Dynein heavy chain AAA lid domain; PF18199 Dynein heavy chain C-terminal…		Z	KOG3595	Dyneins, heavy chain
CGIg03265	1250	S	0.355439	0.00740712	Q39575 DYHG_CHLRE Dynein gamma chain, flagellar outer arm OS=Chlamydomonas reinhardtii OX=3055 GN=ODA2 PE=1 SV=1	ODA2	_SRPQTSLSQLS[Phospho (STY)]NMT[Phospho (STY)]WTTER_	1	Up	0.493721	0.40903	0.483673	0.986069	1.09126	1.82326	0.312895	0.233143	0.441372	1.91683	1.68344	2.12231	cytoplasm,nucleus	K10408	DNAH; dynein axonemal heavy chain					PF12774; PF17852; PF12775; PF17857; PF12780; PF12781; PF03028; PF18198; PF18199	PF12774 Hydrolytic ATP binding site of dynein motor region; PF17852 Dynein heavy chain AAA lid domain; PF12775 P-loop containing dynein motor region; PF17857 AAA+ lid domain; PF12780 P-loop containing dynein motor region D4; PF12781 ATP-binding dynein motor region; PF03028 Dynein heavy chain region D6 P-loop domain ; PF18198 Dynein heavy chain AAA lid domain; PF18199 Dynein heavy chain C-terminal…		Z	KOG3595	Dyneins, heavy chain
CGIg03265	1253	T	0.302368	0.00279611	Q39575 DYHG_CHLRE Dynein gamma chain, flagellar outer arm OS=Chlamydomonas reinhardtii OX=3055 GN=ODA2 PE=1 SV=1	ODA2	_SRPQTSLSQLS[Phospho (STY)]NMT[Phospho (STY)]WTTER_	1	Up	0.452541	0.374914	0.443331	1.10287	1.20297	1.89693	0.286797	0.213697	0.404558	2.00556	1.1316	2.21659	cytoplasm,nucleus	K10408	DNAH; dynein axonemal heavy chain					PF12774; PF17852; PF12775; PF17857; PF12780; PF12781; PF03028; PF18198; PF18199	PF12774 Hydrolytic ATP binding site of dynein motor region; PF17852 Dynein heavy chain AAA lid domain; PF12775 P-loop containing dynein motor region; PF17857 AAA+ lid domain; PF12780 P-loop containing dynein motor region D4; PF12781 ATP-binding dynein motor region; PF03028 Dynein heavy chain region D6 P-loop domain ; PF18198 Dynein heavy chain AAA lid domain; PF18199 Dynein heavy chain C-terminal…		Z	KOG3595	Dyneins, heavy chain
CGIg03281	282	S	0.629374	0.000616431	P50607 TUB_HUMAN Tubby protein homolog OS=Homo sapiens OX=9606 GN=TUB PE=1 SV=1	TUB	_S[Phospho (STY)]PIPPVANQK_	1	Up	0.9107	0.819517	0.82262	1.32451	1.29255	1.43909	1.22198	1.18557	1.03933	1.1988	1.04712	1.14089	nucleus	K19600	TUB, TULP; tubby and related proteins		GO:0001654 eye development; GO:0001894 tissue homeostasis; GO:0001895 retina homeostasis; GO:0003008 system process; GO:0006810 transport; GO:0006897 endocytosis; GO:0006909 phagocytosis; GO:0006910 phagocytosis, recognition; GO:0007275 multicellular organism development; GO:0007423 sensory organ development; GO:0007600 sensory perception; GO:0007605 sensory perception of sound; GO:0008037 cell r…	GO:0005576 extracellular region; GO:0005622 intracellular anatomical structure; GO:0005634 nucleus; GO:0005737 cytoplasm; GO:0005829 cytosol; GO:0005886 plasma membrane; GO:0005929 cilium; GO:0016020 membrane; GO:0016028 rhabdomere; GO:0036477 somatodendritic compartment; GO:0042995 cell projection; GO:0043025 neuronal cell body; GO:0043226 organelle; GO:0043227 membrane-bounded organelle; GO:004…	GO:0005488 binding; GO:0005543 phospholipid binding; GO:0008289 lipid binding; GO:0035091 phosphatidylinositol binding; GO:0043167 ion binding; GO:0043168 anion binding; GO:0044877 protein-containing complex binding;	PF01167	PF01167 Tub family		R	KOG2502	Tub family proteins
CGIg03281	215	T	0.549786	0.00016277	P50607 TUB_HUMAN Tubby protein homolog OS=Homo sapiens OX=9606 GN=TUB PE=1 SV=1	TUB	_T[Phospho (STY)]PDITITGAEDR_	1	Up	0.661493	0.622862	0.69742	1.22347	1.13444	1.24672	0.908023	0.930435	0.852772	1.71896	1.86155	1.68492	nucleus	K19600	TUB, TULP; tubby and related proteins		GO:0001654 eye development; GO:0001894 tissue homeostasis; GO:0001895 retina homeostasis; GO:0003008 system process; GO:0006810 transport; GO:0006897 endocytosis; GO:0006909 phagocytosis; GO:0006910 phagocytosis, recognition; GO:0007275 multicellular organism development; GO:0007423 sensory organ development; GO:0007600 sensory perception; GO:0007605 sensory perception of sound; GO:0008037 cell r…	GO:0005576 extracellular region; GO:0005622 intracellular anatomical structure; GO:0005634 nucleus; GO:0005737 cytoplasm; GO:0005829 cytosol; GO:0005886 plasma membrane; GO:0005929 cilium; GO:0016020 membrane; GO:0016028 rhabdomere; GO:0036477 somatodendritic compartment; GO:0042995 cell projection; GO:0043025 neuronal cell body; GO:0043226 organelle; GO:0043227 membrane-bounded organelle; GO:004…	GO:0005488 binding; GO:0005543 phospholipid binding; GO:0008289 lipid binding; GO:0035091 phosphatidylinositol binding; GO:0043167 ion binding; GO:0043168 anion binding; GO:0044877 protein-containing complex binding;	PF01167	PF01167 Tub family		R	KOG2502	Tub family proteins
CGIg03307	121	Y	0.57057	0.00756017	Q8HXM1 CSTF2_BOVIN Cleavage stimulation factor subunit 2 OS=Bos taurus OX=9913 GN=CSTF2 PE=2 SV=1	CSTF2	_GLQQALGGPIMESPY[Phospho (STY)]GDPVEPEKAPEAISK_	0.999999	Up	0.567809	0.730177	0.791809	1.12931	1.18072	1.35262	0.581297		0.509261	1.12476	0.962369	0.845186	cytoplasm	K14407	CSTF2, RNA15; cleavage stimulation factor subunit 2	map03015 mRNA surveillance pathway	GO:0000375 RNA splicing, via transesterification reactions; GO:0000377 RNA splicing, via transesterification reactions with bulged adenosine as nucleophile; GO:0000398 mRNA splicing, via spliceosome; GO:0006139 nucleobase-containing compound metabolic process; GO:0006351 DNA-templated transcription; GO:0006353 DNA-templated transcription termination; GO:0006366 transcription by RNA polymerase II;…	GO:0005622 intracellular anatomical structure; GO:0005634 nucleus; GO:0005654 nucleoplasm; GO:0005847 mRNA cleavage and polyadenylation specificity factor complex; GO:0005848 mRNA cleavage stimulating factor complex; GO:0005849 mRNA cleavage factor complex; GO:0016604 nuclear body; GO:0016607 nuclear speck; GO:0031974 membrane-enclosed lumen; GO:0031981 nuclear lumen; GO:0032991 protein-containin…	GO:0003676 nucleic acid binding; GO:0003723 RNA binding; GO:0003729 mRNA binding; GO:0005488 binding; GO:0097159 organic cyclic compound binding; GO:1901363 heterocyclic compound binding;	PF00076; PF14304	PF00076 RNA recognition motif. (a.k.a. RRM, RBD, or RNP domain); PF14304 Transcription termination and cleavage factor C-terminal		A	KOG0108	mRNA cleavage and polyadenylation factor I complex, subunit RNA15
CGIg03313	75	S	0.594126	0.00601973	Q9UMY4 SNX12_HUMAN Sorting nexin-12 OS=Homo sapiens OX=9606 GN=SNX12 PE=1 SV=4	SNX12	_RYS[Phospho (STY)]DFEWLR_	1	Up	0.633086	0.708232	0.594792	1.05915	0.94443	1.25517	0.370238	0.620744	0.683387	1.16873	1.31415	1.01008	cytoplasm	K17918	SNX3_12; sorting nexin-3/12	map04144 Endocytosis	GO:0002791 regulation of peptide secretion; GO:0002793 positive regulation of peptide secretion; GO:0006810 transport; GO:0006996 organelle organization; GO:0007275 multicellular organism development; GO:0007444 imaginal disc development; GO:0009888 tissue development; GO:0009987 cellular process; GO:0010646 regulation of cell communication; GO:0010647 positive regulation of cell communication; G…	GO:0005622 intracellular anatomical structure; GO:0005737 cytoplasm; GO:0005768 endosome; GO:0005769 early endosome; GO:0012505 endomembrane system; GO:0016020 membrane; GO:0019898 extrinsic component of membrane; GO:0030904 retromer complex; GO:0031410 cytoplasmic vesicle; GO:0031982 vesicle; GO:0032991 protein-containing complex; GO:0043226 organelle; GO:0043227 membrane-bounded organelle; GO:0…	GO:0005488 binding; GO:0005543 phospholipid binding; GO:0008289 lipid binding; GO:0032266 phosphatidylinositol-3-phosphate binding; GO:0035091 phosphatidylinositol binding; GO:0043167 ion binding; GO:0043168 anion binding; GO:1901981 phosphatidylinositol phosphate binding;	PF00787	PF00787 PX domain	PF00787 PX domain	U	KOG2527	Sorting nexin SNX11
CGIg03340	238	S	0.300471	0.0021056	XP_034332925.1 uncharacterized protein LOC105317928 isoform X1 [Crassostrea gigas]	--	_KPS[Phospho (STY)]TPGPDQENDA_	1	Up	0.580828	0.633206	0.363074	1.79167	1.77267	1.68444	0.414835	0.42547	0.447192	2.30755	1.75159	1.98079	plasma membrane
CGIg03397	131	S	0.632955	0.0124125	O08648 M3K4_MOUSE Mitogen-activated protein kinase kinase kinase 4 OS=Mus musculus OX=10090 GN=Map3k4 PE=1 SV=2	Map3k4	_LGHIDS[Phospho (STY)]DDNLDKDFADDKDK_	1	Up	0.740867	0.65568	0.719249	1.02398	1.33793	0.980819	0.945392	0.884157	1.11601	1.06756	1.07376	0.980671	nucleus	K04428	MAP3K4, MEKK4; mitogen-activated protein kinase kinase kinase 4 [EC:2.7.11.25]	map04010 MAPK signaling pathway; map04013 MAPK signaling pathway - fly; map04624 Toll and Imd signaling pathway; map04912 GnRH signaling pathway	GO:0000003 reproduction; GO:0000165 MAPK cascade; GO:0001890 placenta development; GO:0001932 regulation of protein phosphorylation; GO:0001934 positive regulation of protein phosphorylation; GO:0003002 regionalization; GO:0003006 developmental process involved in reproduction; GO:0006468 protein phosphorylation; GO:0006793 phosphorus metabolic process; GO:0006796 phosphate-containing compound me…	GO:0005622 intracellular anatomical structure; GO:0005737 cytoplasm;	GO:0003824 catalytic activity; GO:0004672 protein kinase activity; GO:0004674 protein serine/threonine kinase activity; GO:0004709 MAP kinase kinase kinase activity; GO:0016301 kinase activity; GO:0016740 transferase activity; GO:0016772 transferase activity, transferring phosphorus-containing groups; GO:0016773 phosphotransferase activity, alcohol group as acceptor; GO:0140096 catalytic activity…	PF00069	PF00069 Protein kinase domain		T	KOG4645	MAPKKK (MAP kinase kinase kinase) SSK2 and related serine/threonine protein kinases
CGIg03397	473	S	0.545414	0.000283477	O08648 M3K4_MOUSE Mitogen-activated protein kinase kinase kinase 4 OS=Mus musculus OX=10090 GN=Map3k4 PE=1 SV=2	Map3k4	_S[Phospho (STY)]SEEFDFTGLNR_	0.997497	Up	0.733448	0.77864	0.7533	1.51345	1.28909	1.35098	0.758325	0.751834	0.890703	1.59411	1.35629	1.07024	nucleus	K04428	MAP3K4, MEKK4; mitogen-activated protein kinase kinase kinase 4 [EC:2.7.11.25]	map04010 MAPK signaling pathway; map04013 MAPK signaling pathway - fly; map04624 Toll and Imd signaling pathway; map04912 GnRH signaling pathway	GO:0000003 reproduction; GO:0000165 MAPK cascade; GO:0001890 placenta development; GO:0001932 regulation of protein phosphorylation; GO:0001934 positive regulation of protein phosphorylation; GO:0003002 regionalization; GO:0003006 developmental process involved in reproduction; GO:0006468 protein phosphorylation; GO:0006793 phosphorus metabolic process; GO:0006796 phosphate-containing compound me…	GO:0005622 intracellular anatomical structure; GO:0005737 cytoplasm;	GO:0003824 catalytic activity; GO:0004672 protein kinase activity; GO:0004674 protein serine/threonine kinase activity; GO:0004709 MAP kinase kinase kinase activity; GO:0016301 kinase activity; GO:0016740 transferase activity; GO:0016772 transferase activity, transferring phosphorus-containing groups; GO:0016773 phosphotransferase activity, alcohol group as acceptor; GO:0140096 catalytic activity…	PF00069	PF00069 Protein kinase domain		T	KOG4645	MAPKKK (MAP kinase kinase kinase) SSK2 and related serine/threonine protein kinases
CGIg03397	534	S	0.451743	0.000112214	O08648 M3K4_MOUSE Mitogen-activated protein kinase kinase kinase 4 OS=Mus musculus OX=10090 GN=Map3k4 PE=1 SV=2	Map3k4	_ISS[Phospho (STY)]PDSSEIPSR_	1	Up	0.498675	0.430142	0.485641	0.988897	1.07169	1.07052	0.425002	0.470506	0.405621	0.719371	0.84098	0.878657	nucleus	K04428	MAP3K4, MEKK4; mitogen-activated protein kinase kinase kinase 4 [EC:2.7.11.25]	map04010 MAPK signaling pathway; map04013 MAPK signaling pathway - fly; map04624 Toll and Imd signaling pathway; map04912 GnRH signaling pathway	GO:0000003 reproduction; GO:0000165 MAPK cascade; GO:0001890 placenta development; GO:0001932 regulation of protein phosphorylation; GO:0001934 positive regulation of protein phosphorylation; GO:0003002 regionalization; GO:0003006 developmental process involved in reproduction; GO:0006468 protein phosphorylation; GO:0006793 phosphorus metabolic process; GO:0006796 phosphate-containing compound me…	GO:0005622 intracellular anatomical structure; GO:0005737 cytoplasm;	GO:0003824 catalytic activity; GO:0004672 protein kinase activity; GO:0004674 protein serine/threonine kinase activity; GO:0004709 MAP kinase kinase kinase activity; GO:0016301 kinase activity; GO:0016740 transferase activity; GO:0016772 transferase activity, transferring phosphorus-containing groups; GO:0016773 phosphotransferase activity, alcohol group as acceptor; GO:0140096 catalytic activity…	PF00069	PF00069 Protein kinase domain		T	KOG4645	MAPKKK (MAP kinase kinase kinase) SSK2 and related serine/threonine protein kinases
CGIg03484	307	T	0.500712	0.000428991	Q5UR67 RIBX_MIMIV N-glycosidase R617 OS=Acanthamoeba polyphaga mimivirus OX=212035 GN=MIMI_R617 PE=3 SV=1	MIMI_R617	_RPTT[Phospho (STY)]PEYSYFR_	1	Up	0.906508	0.77751	0.964658	1.75168	1.73969	1.79845				0.441668	0.400799	0.402007	endoplasmic reticulum	K08857	NEK1_4_5; serine/threonine-protein kinase Nek1/4/5 [EC:2.7.11.1]					PF08719	PF08719 NADAR domain
CGIg03500	345	S	0.0651864	0.039002	XP_034335709.1 uncharacterized protein LOC105331749 [Crassostrea gigas]	--	_KKDDDEDDDES[Phospho (STY)]VENDVILNR_	1	Up		0.178016	0.123348	2.39729	2.3354	2.20198	0.121152	0.278072		0.733165	3.41751	0.73065	plasma membrane
CGIg03534	433	T	0.198407	2.28567e-05	O08837 CDC5L_RAT Cell division cycle 5-like protein OS=Rattus norvegicus OX=10116 GN=Cdc5l PE=1 SV=2	Cdc5l	_MGVAGQT[Phospho (STY)]PLR_	1	Up	0.334207	0.328876	0.373215	1.63745	1.95414	1.6315	0.367845	0.38549	0.387838	1.81791	1.94671	1.79141	nucleus	K12860	CDC5L, CDC5, CEF1; pre-mRNA-splicing factor CDC5/CEF1	map03040 Spliceosome	GO:0000075 cell cycle checkpoint signaling; GO:0000077 DNA damage checkpoint signaling; GO:0000086 G2/M transition of mitotic cell cycle; GO:0000278 mitotic cell cycle; GO:0000375 RNA splicing, via transesterification reactions; GO:0000377 RNA splicing, via transesterification reactions with bulged adenosine as nucleophile; GO:0000398 mRNA splicing, via spliceosome; GO:0006139 nucleobase-containi…	GO:0000974 Prp19 complex; GO:0005622 intracellular anatomical structure; GO:0005634 nucleus; GO:0005654 nucleoplasm; GO:0005681 spliceosomal complex; GO:0005684 U2-type spliceosomal complex; GO:0005737 cytoplasm; GO:0016604 nuclear body; GO:0016607 nuclear speck; GO:0031974 membrane-enclosed lumen; GO:0031981 nuclear lumen; GO:0032991 protein-containing complex; GO:0032993 protein-DNA complex; GO…	GO:0000976 transcription cis-regulatory region binding; GO:0000977 RNA polymerase II transcription regulatory region sequence-specific DNA binding; GO:0000981 DNA-binding transcription factor activity, RNA polymerase II-specific; GO:0001067 transcription regulatory region nucleic acid binding; GO:0001221 transcription coregulator binding; GO:0001222 transcription corepressor binding; GO:0001228 D…	PF13921	PF13921 Myb-like DNA-binding domain		AD	KOG0050	mRNA splicing protein CDC5 (Myb superfamily)
CGIg03534	300	S	0.0599469	2.51831e-05	O08837 CDC5L_RAT Cell division cycle 5-like protein OS=Rattus norvegicus OX=10116 GN=Cdc5l PE=1 SV=2	Cdc5l	_LVLPAPQIS[Phospho (STY)]DQELEEVVK_	1	Up	0.0956279	0.0872573	0.105434	1.68461	1.8586	1.26637		0.112101	0.106688	1.47192	1.12697	0.927071	nucleus	K12860	CDC5L, CDC5, CEF1; pre-mRNA-splicing factor CDC5/CEF1	map03040 Spliceosome	GO:0000075 cell cycle checkpoint signaling; GO:0000077 DNA damage checkpoint signaling; GO:0000086 G2/M transition of mitotic cell cycle; GO:0000278 mitotic cell cycle; GO:0000375 RNA splicing, via transesterification reactions; GO:0000377 RNA splicing, via transesterification reactions with bulged adenosine as nucleophile; GO:0000398 mRNA splicing, via spliceosome; GO:0006139 nucleobase-containi…	GO:0000974 Prp19 complex; GO:0005622 intracellular anatomical structure; GO:0005634 nucleus; GO:0005654 nucleoplasm; GO:0005681 spliceosomal complex; GO:0005684 U2-type spliceosomal complex; GO:0005737 cytoplasm; GO:0016604 nuclear body; GO:0016607 nuclear speck; GO:0031974 membrane-enclosed lumen; GO:0031981 nuclear lumen; GO:0032991 protein-containing complex; GO:0032993 protein-DNA complex; GO…	GO:0000976 transcription cis-regulatory region binding; GO:0000977 RNA polymerase II transcription regulatory region sequence-specific DNA binding; GO:0000981 DNA-binding transcription factor activity, RNA polymerase II-specific; GO:0001067 transcription regulatory region nucleic acid binding; GO:0001221 transcription coregulator binding; GO:0001222 transcription corepressor binding; GO:0001228 D…	PF13921	PF13921 Myb-like DNA-binding domain		AD	KOG0050	mRNA splicing protein CDC5 (Myb superfamily)
CGIg03534	382	T	0.014137	0.000142048	O08837 CDC5L_RAT Cell division cycle 5-like protein OS=Rattus norvegicus OX=10116 GN=Cdc5l PE=1 SV=2	Cdc5l	_GGLNT[Phospho (STY)]PLVESDFSGVTPK_	1	Up	0.0244423	0.0204567	0.0091697	1.31537	1.34854	1.1607	0.0545049			1.70503	1.34517	1.47642	nucleus	K12860	CDC5L, CDC5, CEF1; pre-mRNA-splicing factor CDC5/CEF1	map03040 Spliceosome	GO:0000075 cell cycle checkpoint signaling; GO:0000077 DNA damage checkpoint signaling; GO:0000086 G2/M transition of mitotic cell cycle; GO:0000278 mitotic cell cycle; GO:0000375 RNA splicing, via transesterification reactions; GO:0000377 RNA splicing, via transesterification reactions with bulged adenosine as nucleophile; GO:0000398 mRNA splicing, via spliceosome; GO:0006139 nucleobase-containi…	GO:0000974 Prp19 complex; GO:0005622 intracellular anatomical structure; GO:0005634 nucleus; GO:0005654 nucleoplasm; GO:0005681 spliceosomal complex; GO:0005684 U2-type spliceosomal complex; GO:0005737 cytoplasm; GO:0016604 nuclear body; GO:0016607 nuclear speck; GO:0031974 membrane-enclosed lumen; GO:0031981 nuclear lumen; GO:0032991 protein-containing complex; GO:0032993 protein-DNA complex; GO…	GO:0000976 transcription cis-regulatory region binding; GO:0000977 RNA polymerase II transcription regulatory region sequence-specific DNA binding; GO:0000981 DNA-binding transcription factor activity, RNA polymerase II-specific; GO:0001067 transcription regulatory region nucleic acid binding; GO:0001221 transcription coregulator binding; GO:0001222 transcription corepressor binding; GO:0001228 D…	PF13921	PF13921 Myb-like DNA-binding domain		AD	KOG0050	mRNA splicing protein CDC5 (Myb superfamily)
CGIg03539	3257	S	0.305096	0.0170087	P11533 DMD_CHICK Dystrophin OS=Gallus gallus OX=9031 GN=DMD PE=2 SV=1	DMD	_LGFLPVQTVLEGDVLDSPSPSPQHSIS[Phospho (STY)]SHDMHSR_	0.999707	Up	0.563418	0.547765	0.578625	0.978522	2.16917	2.39092	0.0312499	1.55039		0.925035	2.75289	1.05394	endoplasmic reticulum	K10366	DMD; dystrophin		GO:0002009 morphogenesis of an epithelium; GO:0002165 instar larval or pupal development; GO:0003002 regionalization; GO:0007154 cell communication; GO:0007163 establishment or maintenance of cell polarity; GO:0007267 cell-cell signaling; GO:0007268 chemical synaptic transmission; GO:0007274 neuromuscular synaptic transmission; GO:0007275 multicellular organism development; GO:0007389 pattern spe…	GO:0005622 intracellular anatomical structure; GO:0005737 cytoplasm; GO:0005856 cytoskeleton; GO:0005886 plasma membrane; GO:0016010 dystrophin-associated glycoprotein complex; GO:0016020 membrane; GO:0032991 protein-containing complex; GO:0043226 organelle; GO:0043228 non-membrane-bounded organelle; GO:0043229 intracellular organelle; GO:0043232 intracellular non-membrane-bounded organelle; GO:0…	GO:0003779 actin binding; GO:0005198 structural molecule activity; GO:0005488 binding; GO:0005515 protein binding; GO:0008092 cytoskeletal protein binding; GO:0008307 structural constituent of muscle; GO:0019904 protein domain specific binding; GO:0050699 WW domain binding;	PF00435; PF00397; PF09068; PF09069; PF00569	PF00435 Spectrin repeat; PF00397 WW domain; PF09068 EF hand; PF09069 EF-hand; PF00569 Zinc finger, ZZ type		NTZ	KOG4286	Dystrophin-like protein
CGIg03572	236	S	0.246331	0.00386043	XP_021360747.1 uncharacterized protein LOC110455119 [Mizuhopecten yessoensis]	--	_HYQYS[Phospho (STY)]PIPPFK_	0.998928	Up	0.891256		0.887635	3.71203	2.774	4.34629	0.819934	0.701555	1.14433				nucleus
CGIg03594	837	S	0.142575	0.00106908	Q9VUX2 MIB_DROME E3 ubiquitin-protein ligase mind-bomb OS=Drosophila melanogaster OX=7227 GN=mib1 PE=1 SV=3	mib1	_RTGS[Phospho (STY)]SINIMDMAPPVK_	0.998743	Up	0.2285	0.192834	0.216997	0.932975	1.60145	1.94273	0.529506	0.17522	0.365051	1.0014	1.69093	1.51655	nucleus							PF13519; PF06701	PF13519 von Willebrand factor type A domain; PF06701 Mib_herc2
CGIg03620	83	T	0.0874535	2.70831e-06	Q9DFQ7 RL24_GILMI 60S ribosomal protein L24 OS=Gillichthys mirabilis OX=8222 GN=rpl24 PE=2 SV=2	rpl24	_AVT[Phospho (STY)]GLSLAEIQAK_	1	Up	0.167012	0.201602	0.196969	2.21765	2.06218	2.1874	0.162016	0.17491	0.162482	2.41071	1.8305	2.37517	mitochondria	K02896	RP-L24e, RPL24; large subunit ribosomal protein L24e	map03010 Ribosome	GO:0000027 ribosomal large subunit assembly; GO:0000075 cell cycle checkpoint signaling; GO:0000184 nuclear-transcribed mRNA catabolic process, nonsense-mediated decay; GO:0000278 mitotic cell cycle; GO:0000280 nuclear division; GO:0000902 cell morphogenesis; GO:0000956 nuclear-transcribed mRNA catabolic process; GO:0001654 eye development; GO:0002181 cytoplasmic translation; GO:0006139 nucleobas…	GO:0005622 intracellular anatomical structure; GO:0005737 cytoplasm; GO:0005783 endoplasmic reticulum; GO:0005829 cytosol; GO:0005840 ribosome; GO:0005844 polysome; GO:0012505 endomembrane system; GO:0015934 large ribosomal subunit; GO:0022625 cytosolic large ribosomal subunit; GO:0022626 cytosolic ribosome; GO:0032991 protein-containing complex; GO:0042788 polysomal ribosome; GO:0043226 organell…	GO:0003676 nucleic acid binding; GO:0003723 RNA binding; GO:0003735 structural constituent of ribosome; GO:0005198 structural molecule activity; GO:0005488 binding; GO:0097159 organic cyclic compound binding; GO:1901363 heterocyclic compound binding;	PF01246	PF01246 Ribosomal protein L24e		J	KOG1722	60s ribosomal protein L24
CGIg03620	86	S	0.0551857	0.00218796	Q9DFQ7 RL24_GILMI 60S ribosomal protein L24 OS=Gillichthys mirabilis OX=8222 GN=rpl24 PE=2 SV=2	rpl24	_AVTGLS[Phospho (STY)]LAEIQAK_	1	Up	0.00585155		0.0117415	0.195434	0.134349	0.148412		0.00830468	0.00732299	0.196358	8.4103	0.197542	mitochondria	K02896	RP-L24e, RPL24; large subunit ribosomal protein L24e	map03010 Ribosome	GO:0000027 ribosomal large subunit assembly; GO:0000075 cell cycle checkpoint signaling; GO:0000184 nuclear-transcribed mRNA catabolic process, nonsense-mediated decay; GO:0000278 mitotic cell cycle; GO:0000280 nuclear division; GO:0000902 cell morphogenesis; GO:0000956 nuclear-transcribed mRNA catabolic process; GO:0001654 eye development; GO:0002181 cytoplasmic translation; GO:0006139 nucleobas…	GO:0005622 intracellular anatomical structure; GO:0005737 cytoplasm; GO:0005783 endoplasmic reticulum; GO:0005829 cytosol; GO:0005840 ribosome; GO:0005844 polysome; GO:0012505 endomembrane system; GO:0015934 large ribosomal subunit; GO:0022625 cytosolic large ribosomal subunit; GO:0022626 cytosolic ribosome; GO:0032991 protein-containing complex; GO:0042788 polysomal ribosome; GO:0043226 organell…	GO:0003676 nucleic acid binding; GO:0003723 RNA binding; GO:0003735 structural constituent of ribosome; GO:0005198 structural molecule activity; GO:0005488 binding; GO:0097159 organic cyclic compound binding; GO:1901363 heterocyclic compound binding;	PF01246	PF01246 Ribosomal protein L24e		J	KOG1722	60s ribosomal protein L24
CGIg03695	321	S	0.49908	0.000823278	Q5REU4 SND1_PONAB Staphylococcal nuclease domain-containing protein 1 OS=Pongo abelii OX=9601 GN=SND1 PE=2 SV=1	SND1	_DYS[Phospho (STY)]PSGPTVDIK_	1	Up	0.441969	0.566721	0.536666	0.999579	1.05863	1.0382	0.445608	0.520254	0.666163	0.836742	0.799122	0.802217	cytoplasm	K15979	SND1; staphylococcal nuclease domain-containing protein 1		GO:0000003 reproduction; GO:0006139 nucleobase-containing compound metabolic process; GO:0006401 RNA catabolic process; GO:0006725 cellular aromatic compound metabolic process; GO:0006807 nitrogen compound metabolic process; GO:0007276 gamete generation; GO:0007283 spermatogenesis; GO:0008152 metabolic process; GO:0009056 catabolic process; GO:0009057 macromolecule catabolic process; GO:0009889 r…	GO:0005622 intracellular anatomical structure; GO:0005634 nucleus; GO:0005737 cytoplasm; GO:0005829 cytosol; GO:0016442 RISC complex; GO:0031332 RNAi effector complex; GO:0032991 protein-containing complex; GO:0043226 organelle; GO:0043227 membrane-bounded organelle; GO:0043229 intracellular organelle; GO:0043231 intracellular membrane-bounded organelle; GO:0097433 dense body; GO:1990904 ribonucl…	GO:0003712 transcription coregulator activity; GO:0003713 transcription coactivator activity; GO:0003824 catalytic activity; GO:0004518 nuclease activity; GO:0005488 binding; GO:0005515 protein binding; GO:0016787 hydrolase activity; GO:0016788 hydrolase activity, acting on ester bonds; GO:0140110 transcription regulator activity;	PF00565; PF00567	PF00565 Staphylococcal nuclease homologue; PF00567 Tudor domain		K	KOG2039	Transcriptional coactivator p100
CGIg03719	191	S	0.415406	0.00774825	P35282 RAB21_MOUSE Ras-related protein Rab-21 OS=Mus musculus OX=10090 GN=Rab21 PE=1 SV=4	Rab21	_S[Phospho (STY)]VVVVDDDTPAQQK_	1	Up	0.539168	0.924307	0.674397	1.44641	1.97874	1.72131	1.07411	0.722792	1.16607	0.499215	0.738843	0.688254	cytoplasm	K07890	RAB21; Ras-related protein Rab-21		GO:0001558 regulation of cell growth; GO:0006810 transport; GO:0006996 organelle organization; GO:0007010 cytoskeleton organization; GO:0007017 microtubule-based process; GO:0007018 microtubule-based movement; GO:0007154 cell communication; GO:0007165 signal transduction; GO:0007264 small GTPase mediated signal transduction; GO:0007265 Ras protein signal transduction; GO:0007275 multicellular org…	GO:0000139 Golgi membrane; GO:0005622 intracellular anatomical structure; GO:0005737 cytoplasm; GO:0005768 endosome; GO:0005769 early endosome; GO:0005794 Golgi apparatus; GO:0005795 Golgi stack; GO:0005802 trans-Golgi network; GO:0005829 cytosol; GO:0005886 plasma membrane; GO:0009898 cytoplasmic side of plasma membrane; GO:0010008 endosome membrane; GO:0010009 cytoplasmic side of endosome membr…	GO:0000166 nucleotide binding; GO:0001882 nucleoside binding; GO:0001883 purine nucleoside binding; GO:0003824 catalytic activity; GO:0003924 GTPase activity; GO:0005488 binding; GO:0005515 protein binding; GO:0005525 GTP binding; GO:0016462 pyrophosphatase activity; GO:0016787 hydrolase activity; GO:0016817 hydrolase activity, acting on acid anhydrides; GO:0016818 hydrolase activity, acting on a…	PF00071	PF00071 Ras family		R	KOG0088	GTPase Rab21, small G protein superfamily
CGIg03739	461	T	0.605156	0.000384877	Q99K90 TAB2_MOUSE TGF-beta-activated kinase 1 and MAP3K7-binding protein 2 OS=Mus musculus OX=10090 GN=Tab2 PE=1 SV=1	Tab2	_S[Phospho (STY)]IPT[Phospho (STY)]PPGEDR_	1	Up	0.769803	0.748891	0.814511	1.37988	1.21236	1.2633	0.670456	0.759464	0.588659	1.10809	1.09209	0.909801	nucleus	K04404	MAP3K7IP2, TAB2; TAK1-binding protein 2	map04010 MAPK signaling pathway; map04013 MAPK signaling pathway - fly; map04064 NF-kappa B signaling pathway; map04214 Apoptosis - fly; map04380 Osteoclast differentiation; map04620 Toll-like receptor signaling pathway; map04621 NOD-like receptor signaling pathway; map04624 Toll and Imd signaling pathway; map04657 IL-17 signaling pathway; map04668 TNF signaling pathway	GO:0000165 MAPK cascade; GO:0001932 regulation of protein phosphorylation; GO:0001934 positive regulation of protein phosphorylation; GO:0002218 activation of innate immune response; GO:0002220 innate immune response activating cell surface receptor signaling pathway; GO:0002221 pattern recognition receptor signaling pathway; GO:0002223 stimulatory C-type lectin receptor signaling pathway; GO:000…	GO:0005622 intracellular anatomical structure; GO:0005737 cytoplasm; GO:0005768 endosome; GO:0005829 cytosol; GO:0005886 plasma membrane; GO:0010008 endosome membrane; GO:0012505 endomembrane system; GO:0016020 membrane; GO:0031090 organelle membrane; GO:0031410 cytoplasmic vesicle; GO:0031982 vesicle; GO:0043226 organelle; GO:0043227 membrane-bounded organelle; GO:0043229 intracellular organelle…
CGIg03739	307	T	0.280593	0.00402391	Q99K90 TAB2_MOUSE TGF-beta-activated kinase 1 and MAP3K7-binding protein 2 OS=Mus musculus OX=10090 GN=Tab2 PE=1 SV=1	Tab2	_TIFLQPVPAT[Phospho (STY)]PER_	1	Up	0.297318	0.330154	0.383752	1.67472	0.867049	1.06211		0.582061	0.415176	1.0007	1.12502	1.18863	nucleus	K04404	MAP3K7IP2, TAB2; TAK1-binding protein 2	map04010 MAPK signaling pathway; map04013 MAPK signaling pathway - fly; map04064 NF-kappa B signaling pathway; map04214 Apoptosis - fly; map04380 Osteoclast differentiation; map04620 Toll-like receptor signaling pathway; map04621 NOD-like receptor signaling pathway; map04624 Toll and Imd signaling pathway; map04657 IL-17 signaling pathway; map04668 TNF signaling pathway	GO:0000165 MAPK cascade; GO:0001932 regulation of protein phosphorylation; GO:0001934 positive regulation of protein phosphorylation; GO:0002218 activation of innate immune response; GO:0002220 innate immune response activating cell surface receptor signaling pathway; GO:0002221 pattern recognition receptor signaling pathway; GO:0002223 stimulatory C-type lectin receptor signaling pathway; GO:000…	GO:0005622 intracellular anatomical structure; GO:0005737 cytoplasm; GO:0005768 endosome; GO:0005829 cytosol; GO:0005886 plasma membrane; GO:0010008 endosome membrane; GO:0012505 endomembrane system; GO:0016020 membrane; GO:0031090 organelle membrane; GO:0031410 cytoplasmic vesicle; GO:0031982 vesicle; GO:0043226 organelle; GO:0043227 membrane-bounded organelle; GO:0043229 intracellular organelle…
CGIg03739	631	S	0.223575	0.00501477	Q99K90 TAB2_MOUSE TGF-beta-activated kinase 1 and MAP3K7-binding protein 2 OS=Mus musculus OX=10090 GN=Tab2 PE=1 SV=1	Tab2	_NMNTGPQGSIYSRPPPQTPS[Phospho (STY)]RET[Phospho (STY)]PPPIPPR_	0.999863	Up		0.411696	0.409004	1.80543		1.86537	0.25489	0.244609	0.408691	1.94264			nucleus	K04404	MAP3K7IP2, TAB2; TAK1-binding protein 2	map04010 MAPK signaling pathway; map04013 MAPK signaling pathway - fly; map04064 NF-kappa B signaling pathway; map04214 Apoptosis - fly; map04380 Osteoclast differentiation; map04620 Toll-like receptor signaling pathway; map04621 NOD-like receptor signaling pathway; map04624 Toll and Imd signaling pathway; map04657 IL-17 signaling pathway; map04668 TNF signaling pathway	GO:0000165 MAPK cascade; GO:0001932 regulation of protein phosphorylation; GO:0001934 positive regulation of protein phosphorylation; GO:0002218 activation of innate immune response; GO:0002220 innate immune response activating cell surface receptor signaling pathway; GO:0002221 pattern recognition receptor signaling pathway; GO:0002223 stimulatory C-type lectin receptor signaling pathway; GO:000…	GO:0005622 intracellular anatomical structure; GO:0005737 cytoplasm; GO:0005768 endosome; GO:0005829 cytosol; GO:0005886 plasma membrane; GO:0010008 endosome membrane; GO:0012505 endomembrane system; GO:0016020 membrane; GO:0031090 organelle membrane; GO:0031410 cytoplasmic vesicle; GO:0031982 vesicle; GO:0043226 organelle; GO:0043227 membrane-bounded organelle; GO:0043229 intracellular organelle…
CGIg03753	271	T	0.582764	0.0474621	O75626 PRDM1_HUMAN PR domain zinc finger protein 1 OS=Homo sapiens OX=9606 GN=PRDM1 PE=1 SV=2	PRDM1	_DGS[Phospho (STY)]PT[Phospho (STY)]SEDLER_	0.99971	Up	0.828222	0.757507	1.18737	1.73746	1.82618	1.19487	0.761946	1.22509	4.01169		1.31217	0.674767	nucleus	K24501	PRDM1; PR domain zinc finger protein 1 [EC:2.1.1.-]		GO:0000003 reproduction; GO:0000122 negative regulation of transcription by RNA polymerase II; GO:0001568 blood vessel development; GO:0001654 eye development; GO:0001701 in utero embryonic development; GO:0001754 eye photoreceptor cell differentiation; GO:0001763 morphogenesis of a branching structure; GO:0001890 placenta development; GO:0001892 embryonic placenta development; GO:0001893 materna…	GO:0005622 intracellular anatomical structure; GO:0005634 nucleus; GO:0005654 nucleoplasm; GO:0005737 cytoplasm; GO:0031974 membrane-enclosed lumen; GO:0031981 nuclear lumen; GO:0043226 organelle; GO:0043227 membrane-bounded organelle; GO:0043229 intracellular organelle; GO:0043231 intracellular membrane-bounded organelle; GO:0043233 organelle lumen; GO:0070013 intracellular organelle lumen;	GO:0000976 transcription cis-regulatory region binding; GO:0000977 RNA polymerase II transcription regulatory region sequence-specific DNA binding; GO:0000978 RNA polymerase II cis-regulatory region sequence-specific DNA binding; GO:0000981 DNA-binding transcription factor activity, RNA polymerase II-specific; GO:0000987 cis-regulatory region sequence-specific DNA binding; GO:0001067 transcriptio…	PF00096	PF00096 Zinc finger, C2H2 type		K	KOG2461	Transcription factor BLIMP-1/PRDI-BF1, contains C2H2-type Zn-finger and SET domains
CGIg03812	191	S	0.517426	0.0256177	Q92734 TFG_HUMAN Protein TFG OS=Homo sapiens OX=9606 GN=TFG PE=1 SV=2	TFG	_VMS[Phospho (STY)]SFGMSGPER_	0.999782	Up	0.715467	0.607311	1.13188	1.48201	1.45423	1.80772	1.18895	1.38508	1.45472	2.03492	1.56321		nucleus	K09292	TFG; protein TFG		GO:0001558 regulation of cell growth; GO:0002790 peptide secretion; GO:0006810 transport; GO:0006888 endoplasmic reticulum to Golgi vesicle-mediated transport; GO:0006900 vesicle budding from membrane; GO:0006901 vesicle coating; GO:0006903 vesicle targeting; GO:0006996 organelle organization; GO:0008104 protein localization; GO:0008361 regulation of cell size; GO:0009306 protein secretion; GO:00…	GO:0005622 intracellular anatomical structure; GO:0005737 cytoplasm; GO:0005783 endoplasmic reticulum; GO:0005829 cytosol; GO:0012505 endomembrane system; GO:0043226 organelle; GO:0043227 membrane-bounded organelle; GO:0043229 intracellular organelle; GO:0043231 intracellular membrane-bounded organelle; GO:0070971 endoplasmic reticulum exit site;	GO:0005488 binding; GO:0005515 protein binding; GO:0042802 identical protein binding;	PF00564	PF00564 PB1 domain
CGIg03835	526	S	0.601187	0.0199951	Q9Y566 SHAN1_HUMAN SH3 and multiple ankyrin repeat domains protein 1 OS=Homo sapiens OX=9606 GN=SHANK1 PE=1 SV=2	SHANK1	_AQAFYNS[Phospho (STY)]APDLLR_	1	Up	0.752858	0.706999	0.902293	1.61637	1.17454	1.13823	0.731531	0.92435	0.938358	1.55761	1.38443	1.47304	nucleus	K15009	SHANK; SH3 and multiple ankyrin repeat domains protein	map04724 Glutamatergic synapse	GO:0003008 system process; GO:0006996 organelle organization; GO:0007275 multicellular organism development; GO:0007399 nervous system development; GO:0007416 synapse assembly; GO:0007528 neuromuscular junction development; GO:0007588 excretion; GO:0007610 behavior; GO:0007622 rhythmic behavior; GO:0009966 regulation of signal transduction; GO:0009987 cellular process; GO:0010646 regulation of ce…	GO:0014069 postsynaptic density; GO:0030424 axon; GO:0031594 neuromuscular junction; GO:0032279 asymmetric synapse; GO:0042995 cell projection; GO:0043005 neuron projection; GO:0043195 terminal bouton; GO:0043226 organelle; GO:0043679 axon terminus; GO:0044306 neuron projection terminus; GO:0045202 synapse; GO:0098793 presynapse; GO:0098794 postsynapse; GO:0098984 neuron to neuron synapse; GO:009…	GO:0005198 structural molecule activity; GO:0005488 binding; GO:0005515 protein binding; GO:0030159 signaling receptor complex adaptor activity; GO:0030160 synaptic receptor adaptor activity;	PF00595; PF00536	PF00595 PDZ domain; PF00536 SAM domain (Sterile alpha motif)		S	KOG3528	FOG: PDZ domain
CGIg03835	1543	S	0.582073	1.46373e-05	Q9Y566 SHAN1_HUMAN SH3 and multiple ankyrin repeat domains protein 1 OS=Homo sapiens OX=9606 GN=SHANK1 PE=1 SV=2	SHANK1	_AKS[Phospho (STY)]PVQIQPAK_	1	Up	0.735463	0.687881	0.727032	1.2404	1.23673	1.21721	0.787535	0.679212	0.748875	1.11228	1.23436	1.20956	nucleus	K15009	SHANK; SH3 and multiple ankyrin repeat domains protein	map04724 Glutamatergic synapse	GO:0003008 system process; GO:0006996 organelle organization; GO:0007275 multicellular organism development; GO:0007399 nervous system development; GO:0007416 synapse assembly; GO:0007528 neuromuscular junction development; GO:0007588 excretion; GO:0007610 behavior; GO:0007622 rhythmic behavior; GO:0009966 regulation of signal transduction; GO:0009987 cellular process; GO:0010646 regulation of ce…	GO:0014069 postsynaptic density; GO:0030424 axon; GO:0031594 neuromuscular junction; GO:0032279 asymmetric synapse; GO:0042995 cell projection; GO:0043005 neuron projection; GO:0043195 terminal bouton; GO:0043226 organelle; GO:0043679 axon terminus; GO:0044306 neuron projection terminus; GO:0045202 synapse; GO:0098793 presynapse; GO:0098794 postsynapse; GO:0098984 neuron to neuron synapse; GO:009…	GO:0005198 structural molecule activity; GO:0005488 binding; GO:0005515 protein binding; GO:0030159 signaling receptor complex adaptor activity; GO:0030160 synaptic receptor adaptor activity;	PF00595; PF00536	PF00595 PDZ domain; PF00536 SAM domain (Sterile alpha motif)		S	KOG3528	FOG: PDZ domain
CGIg03835	918	S	0.575145	0.00636423	Q9Y566 SHAN1_HUMAN SH3 and multiple ankyrin repeat domains protein 1 OS=Homo sapiens OX=9606 GN=SHANK1 PE=1 SV=2	SHANK1	_S[Phospho (STY)]ASSITDSLPSSDKPSSEYESSFR_	0.998078	Up	0.620132	0.679622	0.770221	1.19037		1.209	0.812111	0.837268	0.574871	0.979833	0.838073	0.853449	nucleus	K15009	SHANK; SH3 and multiple ankyrin repeat domains protein	map04724 Glutamatergic synapse	GO:0003008 system process; GO:0006996 organelle organization; GO:0007275 multicellular organism development; GO:0007399 nervous system development; GO:0007416 synapse assembly; GO:0007528 neuromuscular junction development; GO:0007588 excretion; GO:0007610 behavior; GO:0007622 rhythmic behavior; GO:0009966 regulation of signal transduction; GO:0009987 cellular process; GO:0010646 regulation of ce…	GO:0014069 postsynaptic density; GO:0030424 axon; GO:0031594 neuromuscular junction; GO:0032279 asymmetric synapse; GO:0042995 cell projection; GO:0043005 neuron projection; GO:0043195 terminal bouton; GO:0043226 organelle; GO:0043679 axon terminus; GO:0044306 neuron projection terminus; GO:0045202 synapse; GO:0098793 presynapse; GO:0098794 postsynapse; GO:0098984 neuron to neuron synapse; GO:009…	GO:0005198 structural molecule activity; GO:0005488 binding; GO:0005515 protein binding; GO:0030159 signaling receptor complex adaptor activity; GO:0030160 synaptic receptor adaptor activity;	PF00595; PF00536	PF00595 PDZ domain; PF00536 SAM domain (Sterile alpha motif)		S	KOG3528	FOG: PDZ domain
CGIg03840	216	Y	0.659197	0.0101504	Q9UPY6 WASF3_HUMAN Wiskott-Aldrich syndrome protein family member 3 OS=Homo sapiens OX=9606 GN=WASF3 PE=1 SV=2	WASF3	_HGVEFSDY[Phospho (STY)]ADPAK_	1	Up	0.713038	0.688665	0.595539		0.993508	1.02637	1.19864	1.10963	1.2706	0.561051	0.545488	0.575157	nucleus	K06083	WASF3; WAS protein family, member 3	map04520 Adherens junction; map04666 Fc gamma R-mediated phagocytosis	GO:0000003 reproduction; GO:0000768 syncytium formation by plasma membrane fusion; GO:0000902 cell morphogenesis; GO:0001501 skeletal system development; GO:0001525 angiogenesis; GO:0001568 blood vessel development; GO:0001654 eye development; GO:0001667 ameboidal-type cell migration; GO:0001745 compound eye morphogenesis; GO:0001764 neuron migration; GO:0001944 vasculature development; GO:000225…	GO:0001726 ruffle; GO:0005622 intracellular anatomical structure; GO:0005634 nucleus; GO:0005737 cytoplasm; GO:0005739 mitochondrion; GO:0005740 mitochondrial envelope; GO:0005741 mitochondrial outer membrane; GO:0005768 endosome; GO:0005769 early endosome; GO:0005829 cytosol; GO:0005856 cytoskeleton; GO:0005886 plasma membrane; GO:0005911 cell-cell junction; GO:0005938 cell cortex; GO:0012505 en…	GO:0003779 actin binding; GO:0005488 binding; GO:0005515 protein binding; GO:0008092 cytoskeletal protein binding; GO:0017124 SH3 domain binding; GO:0019904 protein domain specific binding; GO:0034237 protein kinase A regulatory subunit binding; GO:0044877 protein-containing complex binding; GO:0051018 protein kinase A binding; GO:0071933 Arp2/3 complex binding;				Z	KOG1830	Wiskott Aldrich syndrome proteins
CGIg03840	335	S	0.180273	0.000265005	Q9UPY6 WASF3_HUMAN Wiskott-Aldrich syndrome protein family member 3 OS=Homo sapiens OX=9606 GN=WASF3 PE=1 SV=2	WASF3	_GSSSSIGSNIM[Oxidation (M)]RPNQPPPAPPPHLANLPHHS[Phospho (STY)]PQR_	1	Up	0.340962	0.215927	0.295495	1.52342	1.72187	1.48301	0.384381	0.456012	0.368796	1.60635	1.77243	1.80329	nucleus	K06083	WASF3; WAS protein family, member 3	map04520 Adherens junction; map04666 Fc gamma R-mediated phagocytosis	GO:0000003 reproduction; GO:0000768 syncytium formation by plasma membrane fusion; GO:0000902 cell morphogenesis; GO:0001501 skeletal system development; GO:0001525 angiogenesis; GO:0001568 blood vessel development; GO:0001654 eye development; GO:0001667 ameboidal-type cell migration; GO:0001745 compound eye morphogenesis; GO:0001764 neuron migration; GO:0001944 vasculature development; GO:000225…	GO:0001726 ruffle; GO:0005622 intracellular anatomical structure; GO:0005634 nucleus; GO:0005737 cytoplasm; GO:0005739 mitochondrion; GO:0005740 mitochondrial envelope; GO:0005741 mitochondrial outer membrane; GO:0005768 endosome; GO:0005769 early endosome; GO:0005829 cytosol; GO:0005856 cytoskeleton; GO:0005886 plasma membrane; GO:0005911 cell-cell junction; GO:0005938 cell cortex; GO:0012505 en…	GO:0003779 actin binding; GO:0005488 binding; GO:0005515 protein binding; GO:0008092 cytoskeletal protein binding; GO:0017124 SH3 domain binding; GO:0019904 protein domain specific binding; GO:0034237 protein kinase A regulatory subunit binding; GO:0044877 protein-containing complex binding; GO:0051018 protein kinase A binding; GO:0071933 Arp2/3 complex binding;				Z	KOG1830	Wiskott Aldrich syndrome proteins
CGIg03891	64	S	0.665103	0.0130339	Q9NUJ3 T11L1_HUMAN T-complex protein 11-like protein 1 OS=Homo sapiens OX=9606 GN=TCP11L1 PE=1 SV=1	TCP11L1	_IPPAFMVAAS[Phospho (STY)]PPK_	1	Up	0.793603	0.683921	0.706116	1.208	0.92267	1.1525	0.909329	0.899482	0.947439	0.977421	0.843	0.972915	cytoplasm	K25628	TCP11; T-complex protein 11		GO:0007154 cell communication; GO:0007165 signal transduction; GO:0007275 multicellular organism development; GO:0009966 regulation of signal transduction; GO:0009987 cellular process; GO:0010646 regulation of cell communication; GO:0010737 protein kinase A signaling; GO:0017157 regulation of exocytosis; GO:0019932 second-messenger-mediated signaling; GO:0019933 cAMP-mediated signaling; GO:001993…	GO:0001669 acrosomal vesicle; GO:0005622 intracellular anatomical structure; GO:0005634 nucleus; GO:0005737 cytoplasm; GO:0005856 cytoskeleton; GO:0005874 microtubule; GO:0005929 cilium; GO:0012505 endomembrane system; GO:0015630 microtubule cytoskeleton; GO:0030141 secretory granule; GO:0031410 cytoplasmic vesicle; GO:0031514 motile cilium; GO:0031982 vesicle; GO:0036126 sperm flagellum; GO:0042…					T	KOG1981	SOK1 kinase belonging to the STE20/SPS1/GC kinase family
CGIg03893	122	T	0.351941	2.19905e-06	A3KQA5 ODF3B_DANRE Outer dense fiber protein 3-B OS=Danio rerio OX=7955 GN=odf3b PE=2 SV=2	odf3b	_HPAYSFGT[Phospho (STY)]R_	1	Up	0.624656	0.614888	0.630481	1.77652	1.69323	1.84372	0.674211	0.637532	0.67787	2.18598	2.09824	1.98062	mitochondria	K25636	ODF3; outer dense fiber protein 3			GO:0001520 outer dense fiber; GO:0005622 intracellular anatomical structure; GO:0005856 cytoskeleton; GO:0005929 cilium; GO:0031514 motile cilium; GO:0036126 sperm flagellum; GO:0042995 cell projection; GO:0043226 organelle; GO:0043228 non-membrane-bounded organelle; GO:0043229 intracellular organelle; GO:0043232 intracellular non-membrane-bounded organelle; GO:0097729 9+2 motile cilium; GO:00990…
CGIg03893	234	S	0.200635	0.000730373	A3KQA5 ODF3B_DANRE Outer dense fiber protein 3-B OS=Danio rerio OX=7955 GN=odf3b PE=2 SV=2	odf3b	_KMPEFS[Phospho (STY)]FGIR_	1	Up		0.379865	0.392764	1.82359	1.6963	2.25648	0.396923	0.344464	0.36267	2.7607	2.59066	2.56691	mitochondria	K25636	ODF3; outer dense fiber protein 3			GO:0001520 outer dense fiber; GO:0005622 intracellular anatomical structure; GO:0005856 cytoskeleton; GO:0005929 cilium; GO:0031514 motile cilium; GO:0036126 sperm flagellum; GO:0042995 cell projection; GO:0043226 organelle; GO:0043228 non-membrane-bounded organelle; GO:0043229 intracellular organelle; GO:0043232 intracellular non-membrane-bounded organelle; GO:0097729 9+2 motile cilium; GO:00990…
CGIg03963	1061	S	0.418125	0.00931596	Q8IVL1 NAV2_HUMAN Neuron navigator 2 OS=Homo sapiens OX=9606 GN=NAV2 PE=1 SV=3	NAV2	_GSHS[Phospho (STY)]SSALYEAEDASSVLELK_	0.996376	Up	0.523251	0.537063		1.48963	1.01876	1.29543	0.763633	0.899049		1.68556	1.16285	1.55891	nucleus	K19483	NAV2; neuron navigator 2 [EC:5.6.2.4]		GO:0000003 reproduction; GO:0000902 cell morphogenesis; GO:0001558 regulation of cell growth; GO:0001667 ameboidal-type cell migration; GO:0001817 regulation of cytokine production; GO:0001818 negative regulation of cytokine production; GO:0001889 liver development; GO:0006935 chemotaxis; GO:0006950 response to stress; GO:0006952 defense response; GO:0006996 organelle organization; GO:0007010 cyt…	GO:0005622 intracellular anatomical structure; GO:0005634 nucleus; GO:0005635 nuclear envelope; GO:0005654 nucleoplasm; GO:0005737 cytoplasm; GO:0005794 Golgi apparatus; GO:0012505 endomembrane system; GO:0030027 lamellipodium; GO:0030175 filopodium; GO:0031252 cell leading edge; GO:0031967 organelle envelope; GO:0031974 membrane-enclosed lumen; GO:0031975 envelope; GO:0031981 nuclear lumen; GO:0…	GO:0003779 actin binding; GO:0005488 binding; GO:0005515 protein binding; GO:0008017 microtubule binding; GO:0008092 cytoskeletal protein binding; GO:0015631 tubulin binding; GO:0044877 protein-containing complex binding; GO:0051015 actin filament binding;	PF00004	PF00004 ATPase family associated with various cellular activities (AAA)
CGIg03963	1138	S	0.330794	0.00553747	Q8IVL1 NAV2_HUMAN Neuron navigator 2 OS=Homo sapiens OX=9606 GN=NAV2 PE=1 SV=3	NAV2	_PLNSS[Phospho (STY)]QNSIAHNR_	1	Up		0.511171	0.457303	1.81208	1.28221	1.2973	0.399179		0.521295	1.73505	1.59075	1.76794	nucleus	K19483	NAV2; neuron navigator 2 [EC:5.6.2.4]		GO:0000003 reproduction; GO:0000902 cell morphogenesis; GO:0001558 regulation of cell growth; GO:0001667 ameboidal-type cell migration; GO:0001817 regulation of cytokine production; GO:0001818 negative regulation of cytokine production; GO:0001889 liver development; GO:0006935 chemotaxis; GO:0006950 response to stress; GO:0006952 defense response; GO:0006996 organelle organization; GO:0007010 cyt…	GO:0005622 intracellular anatomical structure; GO:0005634 nucleus; GO:0005635 nuclear envelope; GO:0005654 nucleoplasm; GO:0005737 cytoplasm; GO:0005794 Golgi apparatus; GO:0012505 endomembrane system; GO:0030027 lamellipodium; GO:0030175 filopodium; GO:0031252 cell leading edge; GO:0031967 organelle envelope; GO:0031974 membrane-enclosed lumen; GO:0031975 envelope; GO:0031981 nuclear lumen; GO:0…	GO:0003779 actin binding; GO:0005488 binding; GO:0005515 protein binding; GO:0008017 microtubule binding; GO:0008092 cytoskeletal protein binding; GO:0015631 tubulin binding; GO:0044877 protein-containing complex binding; GO:0051015 actin filament binding;	PF00004	PF00004 ATPase family associated with various cellular activities (AAA)
CGIg03964	492	S	0.351785	0.00308739	F1LMN3 E2F8_RAT Transcription factor E2F8 OS=Rattus norvegicus OX=10116 GN=E2f8 PE=1 SV=2	E2f8	_HSS[Phospho (STY)]FEQIC[Carbamidomethyl (C)]QVAEK_	1	Up	0.405901	0.435916	0.588147	1.15667	1.68609	1.22212	0.879831	0.831338	0.908587	2.06342	3.31983	1.75119	nucleus	K09391	E2F7_8; transcription factor E2F7/8		GO:0000003 reproduction; GO:0000075 cell cycle checkpoint signaling; GO:0000077 DNA damage checkpoint signaling; GO:0000122 negative regulation of transcription by RNA polymerase II; GO:0000278 mitotic cell cycle; GO:0000902 cell morphogenesis; GO:0001525 angiogenesis; GO:0001568 blood vessel development; GO:0001701 in utero embryonic development; GO:0001889 liver development; GO:0001890 placenta…	GO:0005622 intracellular anatomical structure; GO:0005634 nucleus; GO:0005654 nucleoplasm; GO:0005730 nucleolus; GO:0005737 cytoplasm; GO:0005829 cytosol; GO:0031974 membrane-enclosed lumen; GO:0031981 nuclear lumen; GO:0043226 organelle; GO:0043227 membrane-bounded organelle; GO:0043228 non-membrane-bounded organelle; GO:0043229 intracellular organelle; GO:0043231 intracellular membrane-bounded …	GO:0000976 transcription cis-regulatory region binding; GO:0000977 RNA polymerase II transcription regulatory region sequence-specific DNA binding; GO:0000978 RNA polymerase II cis-regulatory region sequence-specific DNA binding; GO:0000981 DNA-binding transcription factor activity, RNA polymerase II-specific; GO:0000987 cis-regulatory region sequence-specific DNA binding; GO:0001067 transcriptio…	PF02319	PF02319 E2F/DP family winged-helix DNA-binding domain		K	KOG2578	Transcription factor E2F/dimerization partner (TDP)-like proteins
CGIg04003	816	S	0.421121	0.00584334	Q5T5C0 STXB5_HUMAN Syntaxin-binding protein 5 OS=Homo sapiens OX=9606 GN=STXBP5 PE=1 SV=1	STXBP5	_S[Phospho (STY)]VS[Phospho (STY)]VPNPQTER_	1	Up		0.259241	0.340747	0.790718	0.666668	0.679726	1.76795	1.95991	1.78953	0.8721		0.999432	plasma membrane	K08518	STXBP5, SRO7_77; syntaxin-binding protein 5		GO:0000902 cell morphogenesis; GO:0002791 regulation of peptide secretion; GO:0002792 negative regulation of peptide secretion; GO:0002793 positive regulation of peptide secretion; GO:0003008 system process; GO:0006810 transport; GO:0006836 neurotransmitter transport; GO:0006887 exocytosis; GO:0006892 post-Golgi vesicle-mediated transport; GO:0006893 Golgi to plasma membrane transport; GO:0007154…	GO:0005622 intracellular anatomical structure; GO:0005737 cytoplasm; GO:0005829 cytosol; GO:0005886 plasma membrane; GO:0005892 acetylcholine-gated channel complex; GO:0008021 synaptic vesicle; GO:0012505 endomembrane system; GO:0016020 membrane; GO:0030133 transport vesicle; GO:0030141 secretory granule; GO:0031201 SNARE complex; GO:0031410 cytoplasmic vesicle; GO:0031594 neuromuscular junction;…	GO:0000149 SNARE binding; GO:0005096 GTPase activator activity; GO:0005488 binding; GO:0005515 protein binding; GO:0008047 enzyme activator activity; GO:0017075 syntaxin-1 binding; GO:0019899 enzyme binding; GO:0019905 syntaxin binding; GO:0030234 enzyme regulator activity; GO:0030695 GTPase regulator activity; GO:0031267 small GTPase binding; GO:0051020 GTPase binding; GO:0060589 nucleoside-trip…				U	KOG1983	Tomosyn and related SNARE-interacting proteins
CGIg04003	818	S	0.31547	0.000213202	Q5T5C0 STXB5_HUMAN Syntaxin-binding protein 5 OS=Homo sapiens OX=9606 GN=STXBP5 PE=1 SV=1	STXBP5	_SVS[Phospho (STY)]VPNPQTER_	1	Up	0.453063	0.365478	0.454581	1.49168	1.29287	1.25107	0.395137	0.419033	0.396207	1.05115	1.08374	1.16853	plasma membrane	K08518	STXBP5, SRO7_77; syntaxin-binding protein 5		GO:0000902 cell morphogenesis; GO:0002791 regulation of peptide secretion; GO:0002792 negative regulation of peptide secretion; GO:0002793 positive regulation of peptide secretion; GO:0003008 system process; GO:0006810 transport; GO:0006836 neurotransmitter transport; GO:0006887 exocytosis; GO:0006892 post-Golgi vesicle-mediated transport; GO:0006893 Golgi to plasma membrane transport; GO:0007154…	GO:0005622 intracellular anatomical structure; GO:0005737 cytoplasm; GO:0005829 cytosol; GO:0005886 plasma membrane; GO:0005892 acetylcholine-gated channel complex; GO:0008021 synaptic vesicle; GO:0012505 endomembrane system; GO:0016020 membrane; GO:0030133 transport vesicle; GO:0030141 secretory granule; GO:0031201 SNARE complex; GO:0031410 cytoplasmic vesicle; GO:0031594 neuromuscular junction;…	GO:0000149 SNARE binding; GO:0005096 GTPase activator activity; GO:0005488 binding; GO:0005515 protein binding; GO:0008047 enzyme activator activity; GO:0017075 syntaxin-1 binding; GO:0019899 enzyme binding; GO:0019905 syntaxin binding; GO:0030234 enzyme regulator activity; GO:0030695 GTPase regulator activity; GO:0031267 small GTPase binding; GO:0051020 GTPase binding; GO:0060589 nucleoside-trip…				U	KOG1983	Tomosyn and related SNARE-interacting proteins
CGIg04003	705	S	0.269513	0.000959518	Q5T5C0 STXB5_HUMAN Syntaxin-binding protein 5 OS=Homo sapiens OX=9606 GN=STXBP5 PE=1 SV=1	STXBP5	_RFPTDGS[Phospho (STY)]GTEDGAR_	0.999844	Up	0.627994	0.561619	0.673531	2.52894	2.07973		0.328147		0.557172	1.28986		1.52937	plasma membrane	K08518	STXBP5, SRO7_77; syntaxin-binding protein 5		GO:0000902 cell morphogenesis; GO:0002791 regulation of peptide secretion; GO:0002792 negative regulation of peptide secretion; GO:0002793 positive regulation of peptide secretion; GO:0003008 system process; GO:0006810 transport; GO:0006836 neurotransmitter transport; GO:0006887 exocytosis; GO:0006892 post-Golgi vesicle-mediated transport; GO:0006893 Golgi to plasma membrane transport; GO:0007154…	GO:0005622 intracellular anatomical structure; GO:0005737 cytoplasm; GO:0005829 cytosol; GO:0005886 plasma membrane; GO:0005892 acetylcholine-gated channel complex; GO:0008021 synaptic vesicle; GO:0012505 endomembrane system; GO:0016020 membrane; GO:0030133 transport vesicle; GO:0030141 secretory granule; GO:0031201 SNARE complex; GO:0031410 cytoplasmic vesicle; GO:0031594 neuromuscular junction;…	GO:0000149 SNARE binding; GO:0005096 GTPase activator activity; GO:0005488 binding; GO:0005515 protein binding; GO:0008047 enzyme activator activity; GO:0017075 syntaxin-1 binding; GO:0019899 enzyme binding; GO:0019905 syntaxin binding; GO:0030234 enzyme regulator activity; GO:0030695 GTPase regulator activity; GO:0031267 small GTPase binding; GO:0051020 GTPase binding; GO:0060589 nucleoside-trip…				U	KOG1983	Tomosyn and related SNARE-interacting proteins
CGIg04003	807	S	0.215738	4.39317e-05	Q5T5C0 STXB5_HUMAN Syntaxin-binding protein 5 OS=Homo sapiens OX=9606 GN=STXBP5 PE=1 SV=1	STXBP5	_S[Phospho (STY)]SPEIHVER_	1	Up	0.380101	0.348834	0.433463	1.84781	1.62632	1.91387	0.443462	0.414636	0.415227	1.74103	1.95909	1.82105	plasma membrane	K08518	STXBP5, SRO7_77; syntaxin-binding protein 5		GO:0000902 cell morphogenesis; GO:0002791 regulation of peptide secretion; GO:0002792 negative regulation of peptide secretion; GO:0002793 positive regulation of peptide secretion; GO:0003008 system process; GO:0006810 transport; GO:0006836 neurotransmitter transport; GO:0006887 exocytosis; GO:0006892 post-Golgi vesicle-mediated transport; GO:0006893 Golgi to plasma membrane transport; GO:0007154…	GO:0005622 intracellular anatomical structure; GO:0005737 cytoplasm; GO:0005829 cytosol; GO:0005886 plasma membrane; GO:0005892 acetylcholine-gated channel complex; GO:0008021 synaptic vesicle; GO:0012505 endomembrane system; GO:0016020 membrane; GO:0030133 transport vesicle; GO:0030141 secretory granule; GO:0031201 SNARE complex; GO:0031410 cytoplasmic vesicle; GO:0031594 neuromuscular junction;…	GO:0000149 SNARE binding; GO:0005096 GTPase activator activity; GO:0005488 binding; GO:0005515 protein binding; GO:0008047 enzyme activator activity; GO:0017075 syntaxin-1 binding; GO:0019899 enzyme binding; GO:0019905 syntaxin binding; GO:0030234 enzyme regulator activity; GO:0030695 GTPase regulator activity; GO:0031267 small GTPase binding; GO:0051020 GTPase binding; GO:0060589 nucleoside-trip…				U	KOG1983	Tomosyn and related SNARE-interacting proteins
CGIg04019	248	S	0.331834	0.0013518	Q4PMB3 RS4_IXOSC 40S ribosomal protein S4 OS=Ixodes scapularis OX=6945 GN=RpS4 PE=2 SV=1	RpS4	_LS[Phospho (STY)]IAEER_	1	Up	0.434476	0.381337	0.607656	1.47559	1.35953	1.45458	0.226241	0.507599	0.163686	1.2923	1.22427	0.974072	mitochondria	K02987	RP-S4e, RPS4; small subunit ribosomal protein S4e	map03010 Ribosome	GO:0002181 cytoplasmic translation; GO:0006412 translation; GO:0006518 peptide metabolic process; GO:0006807 nitrogen compound metabolic process; GO:0008152 metabolic process; GO:0009058 biosynthetic process; GO:0009059 macromolecule biosynthetic process; GO:0009987 cellular process; GO:0010467 gene expression; GO:0019538 protein metabolic process; GO:0034641 cellular nitrogen compound metabolic …	GO:0005622 intracellular anatomical structure; GO:0005737 cytoplasm; GO:0005829 cytosol; GO:0005840 ribosome; GO:0015935 small ribosomal subunit; GO:0022626 cytosolic ribosome; GO:0022627 cytosolic small ribosomal subunit; GO:0032991 protein-containing complex; GO:0043226 organelle; GO:0043228 non-membrane-bounded organelle; GO:0043229 intracellular organelle; GO:0043232 intracellular non-membran…	GO:0003676 nucleic acid binding; GO:0003723 RNA binding; GO:0003735 structural constituent of ribosome; GO:0005198 structural molecule activity; GO:0005488 binding; GO:0097159 organic cyclic compound binding; GO:1901363 heterocyclic compound binding;	PF08071	PF08071 RS4NT (NUC023) domain		J	KOG0378	40S ribosomal protein S4
CGIg04036	416	S	0.632037	0.000745919	O95684 CEP43_HUMAN Centrosomal protein 43 OS=Homo sapiens OX=9606 GN=CEP43 PE=1 SV=1	CEP43	_S[Phospho (STY)]GFDDLTTDR_	1	Up	0.840723	0.755602	0.725848	1.27144	1.17422	1.22844	1.1214	0.84459	1.05346	1.24221	1.37328	1.43409	nucleus	K16546	FGFR10P; FGFR1 oncogene partner		GO:0000086 G2/M transition of mitotic cell cycle; GO:0000278 mitotic cell cycle; GO:0001558 regulation of cell growth; GO:0001932 regulation of protein phosphorylation; GO:0001933 negative regulation of protein phosphorylation; GO:0006468 protein phosphorylation; GO:0006469 negative regulation of protein kinase activity; GO:0006793 phosphorus metabolic process; GO:0006796 phosphate-containing com…	GO:0005622 intracellular anatomical structure; GO:0005634 nucleus; GO:0005737 cytoplasm; GO:0005813 centrosome; GO:0005815 microtubule organizing center; GO:0005829 cytosol; GO:0005856 cytoskeleton; GO:0015630 microtubule cytoskeleton; GO:0043226 organelle; GO:0043227 membrane-bounded organelle; GO:0043228 non-membrane-bounded organelle; GO:0043229 intracellular organelle; GO:0043231 intracellula…	GO:0003824 catalytic activity; GO:0004672 protein kinase activity; GO:0004713 protein tyrosine kinase activity; GO:0004857 enzyme inhibitor activity; GO:0004860 protein kinase inhibitor activity; GO:0005488 binding; GO:0005515 protein binding; GO:0016301 kinase activity; GO:0016740 transferase activity; GO:0016772 transferase activity, transferring phosphorus-containing groups; GO:0016773 phospho…	PF09398; PF13499	PF09398 FOP N terminal dimerisation domain; PF13499 EF-hand domain pair
CGIg04036	335	S	0.266041	4.25816e-06	O95684 CEP43_HUMAN Centrosomal protein 43 OS=Homo sapiens OX=9606 GN=CEP43 PE=1 SV=1	CEP43	_S[Phospho (STY)]LESEEENLR_	1	Up	0.466013	0.432909	0.446232	1.57943	1.74145	1.73532	0.484985	0.349004	0.424642	1.65236	1.31703	1.39426	nucleus	K16546	FGFR10P; FGFR1 oncogene partner		GO:0000086 G2/M transition of mitotic cell cycle; GO:0000278 mitotic cell cycle; GO:0001558 regulation of cell growth; GO:0001932 regulation of protein phosphorylation; GO:0001933 negative regulation of protein phosphorylation; GO:0006468 protein phosphorylation; GO:0006469 negative regulation of protein kinase activity; GO:0006793 phosphorus metabolic process; GO:0006796 phosphate-containing com…	GO:0005622 intracellular anatomical structure; GO:0005634 nucleus; GO:0005737 cytoplasm; GO:0005813 centrosome; GO:0005815 microtubule organizing center; GO:0005829 cytosol; GO:0005856 cytoskeleton; GO:0015630 microtubule cytoskeleton; GO:0043226 organelle; GO:0043227 membrane-bounded organelle; GO:0043228 non-membrane-bounded organelle; GO:0043229 intracellular organelle; GO:0043231 intracellula…	GO:0003824 catalytic activity; GO:0004672 protein kinase activity; GO:0004713 protein tyrosine kinase activity; GO:0004857 enzyme inhibitor activity; GO:0004860 protein kinase inhibitor activity; GO:0005488 binding; GO:0005515 protein binding; GO:0016301 kinase activity; GO:0016740 transferase activity; GO:0016772 transferase activity, transferring phosphorus-containing groups; GO:0016773 phospho…	PF09398; PF13499	PF09398 FOP N terminal dimerisation domain; PF13499 EF-hand domain pair
CGIg04036	338	S	0.167453	4.13612e-06	O95684 CEP43_HUMAN Centrosomal protein 43 OS=Homo sapiens OX=9606 GN=CEP43 PE=1 SV=1	CEP43	_SLES[Phospho (STY)]EEENLR_	1	Up	0.226428	0.269348	0.238074	1.45314	1.46476	1.46453	0.410811	0.312852	0.335089	1.53643	1.47611	1.56068	nucleus	K16546	FGFR10P; FGFR1 oncogene partner		GO:0000086 G2/M transition of mitotic cell cycle; GO:0000278 mitotic cell cycle; GO:0001558 regulation of cell growth; GO:0001932 regulation of protein phosphorylation; GO:0001933 negative regulation of protein phosphorylation; GO:0006468 protein phosphorylation; GO:0006469 negative regulation of protein kinase activity; GO:0006793 phosphorus metabolic process; GO:0006796 phosphate-containing com…	GO:0005622 intracellular anatomical structure; GO:0005634 nucleus; GO:0005737 cytoplasm; GO:0005813 centrosome; GO:0005815 microtubule organizing center; GO:0005829 cytosol; GO:0005856 cytoskeleton; GO:0015630 microtubule cytoskeleton; GO:0043226 organelle; GO:0043227 membrane-bounded organelle; GO:0043228 non-membrane-bounded organelle; GO:0043229 intracellular organelle; GO:0043231 intracellula…	GO:0003824 catalytic activity; GO:0004672 protein kinase activity; GO:0004713 protein tyrosine kinase activity; GO:0004857 enzyme inhibitor activity; GO:0004860 protein kinase inhibitor activity; GO:0005488 binding; GO:0005515 protein binding; GO:0016301 kinase activity; GO:0016740 transferase activity; GO:0016772 transferase activity, transferring phosphorus-containing groups; GO:0016773 phospho…	PF09398; PF13499	PF09398 FOP N terminal dimerisation domain; PF13499 EF-hand domain pair
CGIg04131	508	S	0.527846	0.00109241	Q3V1H9 SAMD5_MOUSE Sterile alpha motif domain-containing protein 5 OS=Mus musculus OX=10090 GN=Samd5 PE=1 SV=1	Samd5	_GFYSSSEVHS[Phospho (STY)]PVTFYSPGHPR_	1	Up	0.712051	0.630336	0.636499	1.30277	1.35096	1.09526	0.878292	0.875365	1.02	1.17683	1.00137	1.73182	cytoplasm	K23705	SASH1; SAM and SH3 domain-containing protein 1		GO:0000209 protein polyubiquitination; GO:0001932 regulation of protein phosphorylation; GO:0001934 positive regulation of protein phosphorylation; GO:0002831 regulation of response to biotic stimulus; GO:0002833 positive regulation of response to biotic stimulus; GO:0003008 system process; GO:0006807 nitrogen compound metabolic process; GO:0007600 sensory perception; GO:0007606 sensory perceptio…	GO:0016020 membrane; GO:0032991 protein-containing complex;	GO:0005198 structural molecule activity; GO:0005488 binding; GO:0005515 protein binding; GO:0019899 enzyme binding; GO:0019900 kinase binding; GO:0019901 protein kinase binding; GO:0031435 mitogen-activated protein kinase kinase kinase binding;	PF07647; PF07653	PF07647 SAM domain (Sterile alpha motif); PF07653 Variant SH3 domain		R	KOG4384	Uncharacterized SAM domain protein
CGIg04131	898	S	0.466021	0.00249846	Q3V1H9 SAMD5_MOUSE Sterile alpha motif domain-containing protein 5 OS=Mus musculus OX=10090 GN=Samd5 PE=1 SV=1	Samd5	_VS[Phospho (STY)]PLQYNK_	1	Up	0.853524	0.619167	0.769477	1.7589	1.41869	1.63372	0.586524	0.752895	0.840487	1.02596	1.39353	1.29854	cytoplasm	K23705	SASH1; SAM and SH3 domain-containing protein 1		GO:0000209 protein polyubiquitination; GO:0001932 regulation of protein phosphorylation; GO:0001934 positive regulation of protein phosphorylation; GO:0002831 regulation of response to biotic stimulus; GO:0002833 positive regulation of response to biotic stimulus; GO:0003008 system process; GO:0006807 nitrogen compound metabolic process; GO:0007600 sensory perception; GO:0007606 sensory perceptio…	GO:0016020 membrane; GO:0032991 protein-containing complex;	GO:0005198 structural molecule activity; GO:0005488 binding; GO:0005515 protein binding; GO:0019899 enzyme binding; GO:0019900 kinase binding; GO:0019901 protein kinase binding; GO:0031435 mitogen-activated protein kinase kinase kinase binding;	PF07647; PF07653	PF07647 SAM domain (Sterile alpha motif); PF07653 Variant SH3 domain		R	KOG4384	Uncharacterized SAM domain protein
CGIg04131	424	S	0.406503	0.000490003	Q3V1H9 SAMD5_MOUSE Sterile alpha motif domain-containing protein 5 OS=Mus musculus OX=10090 GN=Samd5 PE=1 SV=1	Samd5	_S[Phospho (STY)]PSASYYDIVTR_	0.999995	Up	0.711757	0.618752	0.612081	1.78229	1.60495	1.39155	0.705236	0.551811	0.600004	1.19302	1.30941	1.57809	cytoplasm	K23705	SASH1; SAM and SH3 domain-containing protein 1		GO:0000209 protein polyubiquitination; GO:0001932 regulation of protein phosphorylation; GO:0001934 positive regulation of protein phosphorylation; GO:0002831 regulation of response to biotic stimulus; GO:0002833 positive regulation of response to biotic stimulus; GO:0003008 system process; GO:0006807 nitrogen compound metabolic process; GO:0007600 sensory perception; GO:0007606 sensory perceptio…	GO:0016020 membrane; GO:0032991 protein-containing complex;	GO:0005198 structural molecule activity; GO:0005488 binding; GO:0005515 protein binding; GO:0019899 enzyme binding; GO:0019900 kinase binding; GO:0019901 protein kinase binding; GO:0031435 mitogen-activated protein kinase kinase kinase binding;	PF07647; PF07653	PF07647 SAM domain (Sterile alpha motif); PF07653 Variant SH3 domain		R	KOG4384	Uncharacterized SAM domain protein
CGIg04132	44	S	0.627055	0.0186754	Q0U7W4 CCR4_PHANO CCR4-Not complex 3'-5'-exoribonuclease subunit Ccr4 OS=Phaeosphaeria nodorum (strain SN15 / ATCC MYA-4574 / FGSC 10173) OX=321614 GN=CCR4 PE=3 SV=2	CCR4	_GGASQS[Phospho (STY)]PAPQK_	0.999999	Up	0.827969	0.600468	0.660086	1.09365	1.26743	0.969603	1.83118	1.60853	1.62074	0.785389	0.754865	1.098	nucleus	K19612	PDE12; 2',5'-phosphodiesterase [EC:3.1.13.4 3.1.4.-]					PF03372	PF03372 Endonuclease/Exonuclease/phosphatase family		R	KOG1808	AAA ATPase containing von Willebrand factor type A (vWA) domain
CGIg04168	86	S	0.426739	0.00642202	XP_019918227.2 uncharacterized protein LOC105349102 [Crassostrea gigas]	--	_S[Phospho (STY)]MDGLLPK_	1	Up	0.636308	0.872359	0.788756	2.08534	1.35986	1.93847	0.659614	0.708141	0.734644	1.16334	1.83067	1.07159	nucleus
CGIg04200	698	S	0.524564	0.000941263	Q12996 CSTF3_HUMAN Cleavage stimulation factor subunit 3 OS=Homo sapiens OX=9606 GN=CSTF3 PE=1 SV=1	CSTF3	_VTEGEDS[Phospho (STY)]DEEGS[Phospho (STY)]EVTAPPVHDIYR_	1	Up	0.756203	0.825472	0.673728	1.31077	1.52019	1.46862	0.600037	0.705609	0.522167	1.68083	1.54071	1.69884	cytoplasm	K14408	CSTF3, RNA14; cleavage stimulation factor subunit 3	map03015 mRNA surveillance pathway	GO:0000375 RNA splicing, via transesterification reactions; GO:0000377 RNA splicing, via transesterification reactions with bulged adenosine as nucleophile; GO:0000398 mRNA splicing, via spliceosome; GO:0006139 nucleobase-containing compound metabolic process; GO:0006351 DNA-templated transcription; GO:0006353 DNA-templated transcription termination; GO:0006366 transcription by RNA polymerase II;…	GO:0005622 intracellular anatomical structure; GO:0005634 nucleus; GO:0005654 nucleoplasm; GO:0005848 mRNA cleavage stimulating factor complex; GO:0005849 mRNA cleavage factor complex; GO:0031974 membrane-enclosed lumen; GO:0031981 nuclear lumen; GO:0032991 protein-containing complex; GO:0043226 organelle; GO:0043227 membrane-bounded organelle; GO:0043229 intracellular organelle; GO:0043231 intra…	GO:0003676 nucleic acid binding; GO:0003723 RNA binding; GO:0003729 mRNA binding; GO:0005488 binding; GO:0097159 organic cyclic compound binding; GO:1901363 heterocyclic compound binding;				A	KOG1914	mRNA cleavage and polyadenylation factor I complex, subunit RNA14
CGIg04203	1149	S	0.16276	0.000300318	A0A0G2JEB6 CFA47_MOUSE Cilia and flagella-associated protein 47 OS=Mus musculus OX=10090 GN=Cfap47 PE=1 SV=2	Cfap47	_NS[Phospho (STY)]LQHIINPR_	1	Up	0.299885	0.30836	0.190498	1.67141	1.6195	1.61658		0.283352	0.226452	1.52397	1.4909	1.6386	cytoplasm	K25552	CFAP47; cilia- and flagella-associated protein 47					PF14874	PF14874 Flagellar-associated PapD-like
CGIg04204	44	S	0.445936	0.000672144	Q14978 NOLC1_HUMAN Nucleolar and coiled-body phosphoprotein 1 OS=Homo sapiens OX=9606 GN=NOLC1 PE=1 SV=2	NOLC1	_TKPPPQDS[Phospho (STY)]PK_	1	Up	0.468703	0.479211	0.539606	0.96753	1.2383	1.1299	0.599825	0.588485	0.657092	1.32753	1.7521	1.43392	nucleus	K25818	NOLC1; nucleolar and coiled-body phosphoprotein 1		GO:0000154 rRNA modification; GO:0000278 mitotic cell cycle; GO:0000451 rRNA 2'-O-methylation; GO:0001510 RNA methylation; GO:0001837 epithelial to mesenchymal transition; GO:0002119 nematode larval development; GO:0002164 larval development; GO:0006139 nucleobase-containing compound metabolic process; GO:0006351 DNA-templated transcription; GO:0006355 regulation of DNA-templated transcription; G…	GO:0001650 fibrillar center; GO:0005622 intracellular anatomical structure; GO:0005634 nucleus; GO:0005654 nucleoplasm; GO:0005730 nucleolus; GO:0005732 sno(s)RNA-containing ribonucleoprotein complex; GO:0005737 cytoplasm; GO:0015030 Cajal body; GO:0016604 nuclear body; GO:0030532 small nuclear ribonucleoprotein complex; GO:0031428 box C/D RNP complex; GO:0031429 box H/ACA snoRNP complex; GO:0031…	GO:0001042 RNA polymerase I core binding; GO:0003676 nucleic acid binding; GO:0003700 DNA-binding transcription factor activity; GO:0003723 RNA binding; GO:0005048 signal sequence binding; GO:0005488 binding; GO:0005515 protein binding; GO:0008134 transcription factor binding; GO:0008139 nuclear localization sequence binding; GO:0019899 enzyme binding; GO:0019904 protein domain specific binding; …	PF05022	PF05022 SRP40, C-terminal domain		Y	KOG2992	Nucleolar GTPase/ATPase p130
CGIg04205	919	S	0.0509666	1.60853e-06	Q8IN94 OSA_DROME Trithorax group protein osa OS=Drosophila melanogaster OX=7227 GN=osa PE=1 SV=1	osa	_LLS[Phospho (STY)]FLEER_	1	Up	0.0409283	0.0458375	0.0485429	0.966862	0.836008	0.85198	0.0492888	0.0473711	0.041922	0.763674	0.722499	0.824289	nucleus	K11653	ARID1; AT-rich interactive domain-containing protein 1	map04714 Thermogenesis	GO:0000003 reproduction; GO:0000122 negative regulation of transcription by RNA polymerase II; GO:0001568 blood vessel development; GO:0001654 eye development; GO:0001704 formation of primary germ layer; GO:0001838 embryonic epithelial tube formation; GO:0001841 neural tube formation; GO:0001843 neural tube closure; GO:0001890 placenta development; GO:0001944 vasculature development; GO:0002009 m…	GO:0000228 nuclear chromosome; GO:0000785 chromatin; GO:0005622 intracellular anatomical structure; GO:0005634 nucleus; GO:0005654 nucleoplasm; GO:0005694 chromosome; GO:0005737 cytoplasm; GO:0005829 cytosol; GO:0005886 plasma membrane; GO:0016020 membrane; GO:0016514 SWI/SNF complex; GO:0031974 membrane-enclosed lumen; GO:0031981 nuclear lumen; GO:0032991 protein-containing complex; GO:0035060 b…	GO:0000981 DNA-binding transcription factor activity, RNA polymerase II-specific; GO:0003676 nucleic acid binding; GO:0003677 DNA binding; GO:0003700 DNA-binding transcription factor activity; GO:0003712 transcription coregulator activity; GO:0003713 transcription coactivator activity; GO:0005102 signaling receptor binding; GO:0005488 binding; GO:0005515 protein binding; GO:0008134 transcription …	PF01388	PF01388 ARID/BRIGHT DNA binding domain	PF01388 ARID/BRIGHT DNA binding domain	B	KOG2510	SWI-SNF chromatin-remodeling complex protein
CGIg04261	144	S	0.296393	0.00851831	Q5BKL8 XIAP_XENTR E3 ubiquitin-protein ligase XIAP OS=Xenopus tropicalis OX=8364 GN=xiap PE=2 SV=1	xiap	_EAS[Phospho (STY)]FQMATGNLK_	0.999995	Up	0.327365	0.484718		1.52825	1.10339	1.4782	0.553355		0.428146	1.3614	1.60278	1.87102	extracellular	K16061	BIRC7_8; baculoviral IAP repeat-containing protein 7/8	map04120 Ubiquitin mediated proteolysis; map04215 Apoptosis - multiple species	GO:0000165 MAPK cascade; GO:0000209 protein polyubiquitination; GO:0001932 regulation of protein phosphorylation; GO:0001934 positive regulation of protein phosphorylation; GO:0002225 positive regulation of antimicrobial peptide production; GO:0002682 regulation of immune system process; GO:0002684 positive regulation of immune system process; GO:0002697 regulation of immune effector process; GO:…	GO:0005622 intracellular anatomical structure; GO:0005634 nucleus; GO:0005737 cytoplasm; GO:0005794 Golgi apparatus; GO:0005815 microtubule organizing center; GO:0005829 cytosol; GO:0005856 cytoskeleton; GO:0012505 endomembrane system; GO:0015630 microtubule cytoskeleton; GO:0043226 organelle; GO:0043227 membrane-bounded organelle; GO:0043228 non-membrane-bounded organelle; GO:0043229 intracellul…	GO:0002020 protease binding; GO:0003824 catalytic activity; GO:0004842 ubiquitin-protein transferase activity; GO:0004857 enzyme inhibitor activity; GO:0004866 endopeptidase inhibitor activity; GO:0004869 cysteine-type endopeptidase inhibitor activity; GO:0005488 binding; GO:0005515 protein binding; GO:0008270 zinc ion binding; GO:0016740 transferase activity; GO:0019787 ubiquitin-like protein tr…	PF00653; PF13920	PF00653 Inhibitor of Apoptosis domain; PF13920 Zinc finger, C3HC4 type (RING finger)	PF00653 Inhibitor of Apoptosis domain	DR	KOG1101	Apoptosis inhibitor IAP1 and related BIR domain proteins
CGIg04267	209	S	0.477852	0.000873713	O08560 DGKZ_RAT Diacylglycerol kinase zeta OS=Rattus norvegicus OX=10116 GN=Dgkz PE=1 SV=1	Dgkz	_SC[Carbamidomethyl (C)]S[Phospho (STY)]PDC[Carbamidomethyl (C)]GYPR_	1	Up	0.692724	0.676472	0.647318	1.59582	1.21156	1.41258	0.934386	0.958275	0.841153	1.18588	1.11707	1.31313	nucleus	K00901	dgkA, DGK; diacylglycerol kinase (ATP) [EC:2.7.1.107]	map00561 Glycerolipid metabolism; map00564 Glycerophospholipid metabolism; map01100 Metabolic pathways; map04070 Phosphatidylinositol signaling system; map04072 Phospholipase D signaling pathway; map04361 Axon regeneration	GO:0000075 cell cycle checkpoint signaling; GO:0000077 DNA damage checkpoint signaling; GO:0000278 mitotic cell cycle; GO:0001775 cell activation; GO:0006629 lipid metabolic process; GO:0006638 neutral lipid metabolic process; GO:0006639 acylglycerol metabolic process; GO:0006793 phosphorus metabolic process; GO:0006796 phosphate-containing compound metabolic process; GO:0006950 response to stres…	GO:0005622 intracellular anatomical structure; GO:0005634 nucleus; GO:0005654 nucleoplasm; GO:0005737 cytoplasm; GO:0005886 plasma membrane; GO:0016020 membrane; GO:0016604 nuclear body; GO:0016607 nuclear speck; GO:0030027 lamellipodium; GO:0031252 cell leading edge; GO:0031974 membrane-enclosed lumen; GO:0031981 nuclear lumen; GO:0042995 cell projection; GO:0043226 organelle; GO:0043227 membran…	GO:0000166 nucleotide binding; GO:0001727 lipid kinase activity; GO:0003824 catalytic activity; GO:0004143 ATP-dependent diacylglycerol kinase activity; GO:0004857 enzyme inhibitor activity; GO:0005488 binding; GO:0005515 protein binding; GO:0005524 ATP binding; GO:0016301 kinase activity; GO:0016740 transferase activity; GO:0016772 transferase activity, transferring phosphorus-containing groups;…	PF00130	PF00130 Phorbol esters/diacylglycerol binding domain (C1 domain)		T	KOG0782	Predicted diacylglycerol kinase
CGIg04267	11	S	0.437168	0.0155159	O08560 DGKZ_RAT Diacylglycerol kinase zeta OS=Rattus norvegicus OX=10116 GN=Dgkz PE=1 SV=1	Dgkz	_S[Phospho (STY)]RS[Phospho (STY)]PS[Phospho (STY)]FEIPK_	1	Up	0.641208	0.394244	0.637552	1.52304	0.982621	1.32125	0.638482	0.66338	0.577175	1.24748	0.829482	1.6753	nucleus	K00901	dgkA, DGK; diacylglycerol kinase (ATP) [EC:2.7.1.107]	map00561 Glycerolipid metabolism; map00564 Glycerophospholipid metabolism; map01100 Metabolic pathways; map04070 Phosphatidylinositol signaling system; map04072 Phospholipase D signaling pathway; map04361 Axon regeneration	GO:0000075 cell cycle checkpoint signaling; GO:0000077 DNA damage checkpoint signaling; GO:0000278 mitotic cell cycle; GO:0001775 cell activation; GO:0006629 lipid metabolic process; GO:0006638 neutral lipid metabolic process; GO:0006639 acylglycerol metabolic process; GO:0006793 phosphorus metabolic process; GO:0006796 phosphate-containing compound metabolic process; GO:0006950 response to stres…	GO:0005622 intracellular anatomical structure; GO:0005634 nucleus; GO:0005654 nucleoplasm; GO:0005737 cytoplasm; GO:0005886 plasma membrane; GO:0016020 membrane; GO:0016604 nuclear body; GO:0016607 nuclear speck; GO:0030027 lamellipodium; GO:0031252 cell leading edge; GO:0031974 membrane-enclosed lumen; GO:0031981 nuclear lumen; GO:0042995 cell projection; GO:0043226 organelle; GO:0043227 membran…	GO:0000166 nucleotide binding; GO:0001727 lipid kinase activity; GO:0003824 catalytic activity; GO:0004143 ATP-dependent diacylglycerol kinase activity; GO:0004857 enzyme inhibitor activity; GO:0005488 binding; GO:0005515 protein binding; GO:0005524 ATP binding; GO:0016301 kinase activity; GO:0016740 transferase activity; GO:0016772 transferase activity, transferring phosphorus-containing groups;…	PF00130	PF00130 Phorbol esters/diacylglycerol binding domain (C1 domain)		T	KOG0782	Predicted diacylglycerol kinase
CGIg04288	569	Y	0.150418	0.00136621	Q6PEI7 PYRG1_DANRE CTP synthase 1 OS=Danio rerio OX=7955 GN=ctps1 PE=1 SV=1	ctps1	_MS[Phospho (STY)]PHLSY[Phospho (STY)]SEGNEEDDEELAEIVR_	0.999998	Up	0.223238	0.125691	0.28516	1.43371	1.47543	1.30637	0.716187	2.67347	1.63618	1.39592	0.229017	1.74679	cytoplasm	K01937	pyrG, CTPS; CTP synthase [EC:6.3.4.2]	map00240 Pyrimidine metabolism; map01100 Metabolic pathways; map01240 Biosynthesis of cofactors	GO:0001775 cell activation; GO:0002164 larval development; GO:0002376 immune system process; GO:0002520 immune system development; GO:0006139 nucleobase-containing compound metabolic process; GO:0006213 pyrimidine nucleoside metabolic process; GO:0006220 pyrimidine nucleotide metabolic process; GO:0006221 pyrimidine nucleotide biosynthetic process; GO:0006241 CTP biosynthetic process; GO:0006725 …	GO:0005622 intracellular anatomical structure; GO:0005737 cytoplasm; GO:0005829 cytosol; GO:0097268 cytoophidium;	GO:0003824 catalytic activity; GO:0003883 CTP synthase activity; GO:0005488 binding; GO:0005515 protein binding; GO:0016874 ligase activity; GO:0016879 ligase activity, forming carbon-nitrogen bonds; GO:0042802 identical protein binding;	PF06418; PF00117	PF06418 CTP synthase N-terminus; PF00117 Glutamine amidotransferase class-I		F	KOG2387	CTP synthase (UTP-ammonia lyase)
CGIg04317	325	S	0.0704576	0.00282174	P20480 NCD_DROME Protein claret segregational OS=Drosophila melanogaster OX=7227 GN=ncd PE=1 SV=1	ncd	_SES[Phospho (STY)]TNC[Carbamidomethyl (C)]LSATK_	1	Up	0.165629	0.0439107	0.14478	1.4919	1.64266	1.89428	0.564487	0.527983	0.539269	1.48058	1.60416	1.20665	peroxisome	K10405	KIFC1; kinesin family member C1		GO:0000003 reproduction; GO:0000022 mitotic spindle elongation; GO:0000070 mitotic sister chromatid segregation; GO:0000212 meiotic spindle organization; GO:0000226 microtubule cytoskeleton organization; GO:0000278 mitotic cell cycle; GO:0000280 nuclear division; GO:0000819 sister chromatid segregation; GO:0001578 microtubule bundle formation; GO:0006403 RNA localization; GO:0006810 transport; GO…	GO:0000922 spindle pole; GO:0005622 intracellular anatomical structure; GO:0005634 nucleus; GO:0005737 cytoplasm; GO:0005813 centrosome; GO:0005815 microtubule organizing center; GO:0005819 spindle; GO:0005856 cytoskeleton; GO:0005871 kinesin complex; GO:0005874 microtubule; GO:0005875 microtubule associated complex; GO:0005876 spindle microtubule; GO:0015630 microtubule cytoskeleton; GO:0030139 …	GO:0000166 nucleotide binding; GO:0003774 cytoskeletal motor activity; GO:0003777 microtubule motor activity; GO:0003824 catalytic activity; GO:0005488 binding; GO:0005515 protein binding; GO:0005524 ATP binding; GO:0008569 minus-end-directed microtubule motor activity; GO:0016462 pyrophosphatase activity; GO:0016787 hydrolase activity; GO:0016817 hydrolase activity, acting on acid anhydrides; GO…	PF00225	PF00225 Kinesin motor domain		Z	KOG0239	Kinesin (KAR3 subfamily)
CGIg04319	42	T	0.337811	0.0015698	XP_011422053.2 PRKC apoptosis WT1 regulator protein isoform X1 [Crassostrea gigas]	--	_PIEDRET[Phospho (STY)]PR_	1	Up	0.586429	0.42544	0.620842	1.5406	1.42354	1.86907	0.568322	0.683419	0.674719	1.15573	1.19206	1.00659	nucleus
CGIg04319	316	S	0.306627	5.18024e-05	XP_011422053.2 PRKC apoptosis WT1 regulator protein isoform X1 [Crassostrea gigas]	--	_KDS[Phospho (STY)]PFQSQFR_	1	Up	0.524122	0.423829	0.463874	1.48798	1.59116	1.52523	0.542874	0.637597	0.619119	1.809	1.90647	1.58345	nucleus
CGIg04388	1764	S	0.600849	0.0180445	XP_034332782.1 uncharacterized protein LOC105332671 isoform X15 [Crassostrea gigas]	--	_GS[Phospho (STY)]HEELIPSK_	0.999996	Up	0.727647	0.817894	0.561461	1.30961	1.18157	1.01552	0.996939	0.849199	1.01412	1.03983	1.09741	1.09051	extracellular
CGIg04436	12	S	0.449187	0.000420524	Q7SXL7 FL2D_DANRE Pre-mRNA-splicing regulator WTAP OS=Danio rerio OX=7955 GN=wtap PE=2 SV=1	wtap	_ARS[Phospho (STY)]DADLTELSK_	1	Up	0.677523	0.562234	0.528901	1.29508	1.32399	1.31839	0.599315	0.52585	0.595273	1.69381	1.50252	1.46779	nucleus	K22824	WTAP; pre-mRNA-splicing regulator WTAP		GO:0000003 reproduction; GO:0000375 RNA splicing, via transesterification reactions; GO:0000381 regulation of alternative mRNA splicing, via spliceosome; GO:0001510 RNA methylation; GO:0001654 eye development; GO:0003006 developmental process involved in reproduction; GO:0006139 nucleobase-containing compound metabolic process; GO:0006325 chromatin organization; GO:0006355 regulation of DNA-templ…	GO:0005622 intracellular anatomical structure; GO:0005634 nucleus; GO:0005635 nuclear envelope; GO:0005654 nucleoplasm; GO:0005737 cytoplasm; GO:0012505 endomembrane system; GO:0016020 membrane; GO:0016604 nuclear body; GO:0016607 nuclear speck; GO:0031090 organelle membrane; GO:0031965 nuclear membrane; GO:0031967 organelle envelope; GO:0031974 membrane-enclosed lumen; GO:0031975 envelope; GO:00…	GO:0005488 binding; GO:0005515 protein binding;				A	KOG2991	Splicing regulator
CGIg04436	397	T	0.351285	0.000203261	Q7SXL7 FL2D_DANRE Pre-mRNA-splicing regulator WTAP OS=Danio rerio OX=7955 GN=wtap PE=2 SV=1	wtap	_T[Phospho (STY)]PLKEEVGEA_	1	Up	0.541109	0.550855	0.692649	1.74229	1.68905	1.64891	0.892448	0.626613	0.718295	1.71663	1.77091	1.49368	nucleus	K22824	WTAP; pre-mRNA-splicing regulator WTAP		GO:0000003 reproduction; GO:0000375 RNA splicing, via transesterification reactions; GO:0000381 regulation of alternative mRNA splicing, via spliceosome; GO:0001510 RNA methylation; GO:0001654 eye development; GO:0003006 developmental process involved in reproduction; GO:0006139 nucleobase-containing compound metabolic process; GO:0006325 chromatin organization; GO:0006355 regulation of DNA-templ…	GO:0005622 intracellular anatomical structure; GO:0005634 nucleus; GO:0005635 nuclear envelope; GO:0005654 nucleoplasm; GO:0005737 cytoplasm; GO:0012505 endomembrane system; GO:0016020 membrane; GO:0016604 nuclear body; GO:0016607 nuclear speck; GO:0031090 organelle membrane; GO:0031965 nuclear membrane; GO:0031967 organelle envelope; GO:0031974 membrane-enclosed lumen; GO:0031975 envelope; GO:00…	GO:0005488 binding; GO:0005515 protein binding;				A	KOG2991	Splicing regulator
CGIg04438	13	S	0.222919	0.0258268	Q6GL42 TM39A_XENTR Transmembrane protein 39A OS=Xenopus tropicalis OX=8364 GN=tmem39a PE=2 SV=1	tmem39a	_IQS[Phospho (STY)]NSYNSSSK_	0.999966	Up	0.359343		0.359713	1.71088	1.51477		0.306215	0.250772			1.296	1.23093	plasma membrane										S	KOG3828	Uncharacterized conserved protein
CGIg04455	205	S	0.216007	0.000192698	P41436 IAP_GVCPM Apoptosis inhibitor IAP OS=Cydia pomonella granulosis virus (isolate Mexico/1963) OX=654905 GN=IAP PE=4 SV=1	IAP	_ENNLMS[Phospho (STY)]PVR_	1	Up	0.258127	0.372063	0.327428	1.60406	1.36131	1.46791	0.227839	0.25677	0.276889	1.31183	1.25045	1.26758	cytoplasm	K16061	BIRC7_8; baculoviral IAP repeat-containing protein 7/8	map04120 Ubiquitin mediated proteolysis; map04215 Apoptosis - multiple species				PF00653	PF00653 Inhibitor of Apoptosis domain		DR	KOG1101	Apoptosis inhibitor IAP1 and related BIR domain proteins
CGIg04455	314	S	0.185936	1.19322e-05	P41436 IAP_GVCPM Apoptosis inhibitor IAP OS=Cydia pomonella granulosis virus (isolate Mexico/1963) OX=654905 GN=IAP PE=4 SV=1	IAP	_TDS[Phospho (STY)]RDS[Phospho (STY)]LTLQPC[Carbamidomethyl (C)]R_	1	Up	0.491643	0.611257	0.557764	2.95394	2.96097	3.01645	0.457087	0.328762	0.430724	3.49138	2.75879	1.76825	cytoplasm	K16061	BIRC7_8; baculoviral IAP repeat-containing protein 7/8	map04120 Ubiquitin mediated proteolysis; map04215 Apoptosis - multiple species				PF00653	PF00653 Inhibitor of Apoptosis domain		DR	KOG1101	Apoptosis inhibitor IAP1 and related BIR domain proteins
CGIg04455	317	S	0.0443732	0.0025711	P41436 IAP_GVCPM Apoptosis inhibitor IAP OS=Cydia pomonella granulosis virus (isolate Mexico/1963) OX=654905 GN=IAP PE=4 SV=1	IAP	_TDS[Phospho (STY)]RDS[Phospho (STY)]LTLQPC[Carbamidomethyl (C)]R_	1	Up	0.0443682	0.242418	0.131549	3.07633	3.14688	3.20446	0.129205		0.101829	3.39873	2.86233	2.77819	cytoplasm	K16061	BIRC7_8; baculoviral IAP repeat-containing protein 7/8	map04120 Ubiquitin mediated proteolysis; map04215 Apoptosis - multiple species				PF00653	PF00653 Inhibitor of Apoptosis domain		DR	KOG1101	Apoptosis inhibitor IAP1 and related BIR domain proteins
CGIg04456	135	S	0.596402	0.0215312	Q99LL5 PWP1_MOUSE Periodic tryptophan protein 1 homolog OS=Mus musculus OX=10090 GN=Pwp1 PE=1 SV=1	Pwp1	_DEGDS[Phospho (STY)]DDEDFEIK_	1	Up	0.676622	0.675322	0.743356	1.37078	0.886685	1.25578	0.998001	1.01291	1.20855	0.752728	0.804329	0.960094	nucleus	K14791	PWP1; periodic tryptophan protein 1		GO:0000003 reproduction; GO:0001932 regulation of protein phosphorylation; GO:0001933 negative regulation of protein phosphorylation; GO:0002064 epithelial cell development; GO:0002065 columnar/cuboidal epithelial cell differentiation; GO:0002066 columnar/cuboidal epithelial cell development; GO:0003006 developmental process involved in reproduction; GO:0006139 nucleobase-containing compound meta…	GO:0005622 intracellular anatomical structure; GO:0005634 nucleus; GO:0005654 nucleoplasm; GO:0005730 nucleolus; GO:0005737 cytoplasm; GO:0005794 Golgi apparatus; GO:0012505 endomembrane system; GO:0031974 membrane-enclosed lumen; GO:0031981 nuclear lumen; GO:0043226 organelle; GO:0043227 membrane-bounded organelle; GO:0043228 non-membrane-bounded organelle; GO:0043229 intracellular organelle; GO…	GO:0003676 nucleic acid binding; GO:0003677 DNA binding; GO:0003682 chromatin binding; GO:0005488 binding; GO:0005515 protein binding; GO:0031490 chromatin DNA binding; GO:0035064 methylated histone binding; GO:0042393 histone binding; GO:0097159 organic cyclic compound binding; GO:0140030 modification-dependent protein binding; GO:0140034 methylation-dependent protein binding; GO:1901363 heteroc…				S	KOG0270	WD40 repeat-containing protein
CGIg04457	771	S	0.288127	2.24494e-05	Q68CP9 ARID2_HUMAN AT-rich interactive domain-containing protein 2 OS=Homo sapiens OX=9606 GN=ARID2 PE=1 SV=2	ARID2	_VQQSS[Phospho (STY)]PVPIAPK_	0.999997	Up	0.471783	0.496794	0.531767	1.77161	1.59582	1.83981	0.530542	0.498577		1.66372	1.55667	1.64626	nucleus	K11765	ARID2; AT-rich interactive domain-containing protein 2		GO:0001568 blood vessel development; GO:0001944 vasculature development; GO:0002009 morphogenesis of an epithelium; GO:0002165 instar larval or pupal development; GO:0003007 heart morphogenesis; GO:0006325 chromatin organization; GO:0006337 nucleosome disassembly; GO:0006355 regulation of DNA-templated transcription; GO:0006357 regulation of transcription by RNA polymerase II; GO:0006996 organell…	GO:0000228 nuclear chromosome; GO:0000785 chromatin; GO:0005622 intracellular anatomical structure; GO:0005634 nucleus; GO:0005654 nucleoplasm; GO:0005667 transcription regulator complex; GO:0005694 chromosome; GO:0005700 polytene chromosome; GO:0005886 plasma membrane; GO:0016020 membrane; GO:0016586 RSC-type complex; GO:0031974 membrane-enclosed lumen; GO:0031981 nuclear lumen; GO:0032991 prote…	GO:0000981 DNA-binding transcription factor activity, RNA polymerase II-specific; GO:0003676 nucleic acid binding; GO:0003677 DNA binding; GO:0003700 DNA-binding transcription factor activity; GO:0005488 binding; GO:0005515 protein binding; GO:0008134 transcription factor binding; GO:0097159 organic cyclic compound binding; GO:0140110 transcription regulator activity; GO:1901363 heterocyclic comp…	PF01388; PF02257	PF01388 ARID/BRIGHT DNA binding domain; PF02257 RFX DNA-binding domain		K	KOG2744	DNA-binding proteins Bright/BRCAA1/RBP1 and related proteins containing BRIGHT domain
CGIg04475	203	S	0.394365	0.00216306	Q9LTD8 Y5279_ARATH DUF21 domain-containing protein At5g52790 OS=Arabidopsis thaliana OX=3702 GN=CBSDUF5 PE=2 SV=2	CBSDUF5	_VLVDLHGPNS[Phospho (STY)]QANLSHQQEEDDDEPLSIDEVLIIK_	1	Up	0.74288	0.596762	0.485016	1.62262	1.38196	1.62224	0.624057	1.30993	1.3134	1.49915	1.40045	1.52666	plasma membrane	K16302	CNNM; metal transporter CNNM					PF01595; PF00571	PF01595 Cyclin M transmembrane N-terminal domain; PF00571 CBS domain		S	KOG2118	Predicted membrane protein, contains two CBS domains
CGIg04475	414	S	0.240608	0.00512303	Q9LTD8 Y5279_ARATH DUF21 domain-containing protein At5g52790 OS=Arabidopsis thaliana OX=3702 GN=CBSDUF5 PE=2 SV=2	CBSDUF5	_LHS[Phospho (STY)]QDPDR_	1	Up	0.291482		0.276599	0.942252	1.53367	1.06561	0.207161	0.250673	0.0717449	0.728574	0.779236	0.79403	plasma membrane	K16302	CNNM; metal transporter CNNM					PF01595; PF00571	PF01595 Cyclin M transmembrane N-terminal domain; PF00571 CBS domain		S	KOG2118	Predicted membrane protein, contains two CBS domains
CGIg04488	642	S	0.649146	0.00105835	Q6Q759 SPG17_HUMAN Sperm-associated antigen 17 OS=Homo sapiens OX=9606 GN=SPAG17 PE=2 SV=1	SPAG17	_EEFMST[Phospho (STY)]PS[Phospho (STY)]EER_	1	Up	0.637291	0.701061	0.587383	0.995374	0.983796	0.987394	0.847185	0.976326	0.998078	0.992713	0.884302	0.936605	nucleus	K25533	SPAG17; sperm-associated antigen 17		GO:0000226 microtubule cytoskeleton organization; GO:0001578 microtubule bundle formation; GO:0003341 cilium movement; GO:0003351 epithelial cilium movement involved in extracellular fluid movement; GO:0006996 organelle organization; GO:0007010 cytoskeleton organization; GO:0007017 microtubule-based process; GO:0007018 microtubule-based movement; GO:0009987 cellular process; GO:0016043 cellular c…	GO:0005622 intracellular anatomical structure; GO:0005737 cytoplasm; GO:0005856 cytoskeleton; GO:0005929 cilium; GO:0005930 axoneme; GO:0032838 plasma membrane bounded cell projection cytoplasm; GO:0042995 cell projection; GO:0043226 organelle; GO:0043228 non-membrane-bounded organelle; GO:0043229 intracellular organelle; GO:0043232 intracellular non-membrane-bounded organelle; GO:0097014 ciliary…		PF14874	PF14874 Flagellar-associated PapD-like
CGIg04488	729	S	0.628444	0.0377304	Q6Q759 SPG17_HUMAN Sperm-associated antigen 17 OS=Homo sapiens OX=9606 GN=SPAG17 PE=2 SV=1	SPAG17	_MEKS[Phospho (STY)]PDPSDR_	1	Up	0.70321	0.659678	0.76392	1.36564	0.848948	1.16966	0.803694	0.88389	0.866665	1.30016	0.779152	1.08809	nucleus	K25533	SPAG17; sperm-associated antigen 17		GO:0000226 microtubule cytoskeleton organization; GO:0001578 microtubule bundle formation; GO:0003341 cilium movement; GO:0003351 epithelial cilium movement involved in extracellular fluid movement; GO:0006996 organelle organization; GO:0007010 cytoskeleton organization; GO:0007017 microtubule-based process; GO:0007018 microtubule-based movement; GO:0009987 cellular process; GO:0016043 cellular c…	GO:0005622 intracellular anatomical structure; GO:0005737 cytoplasm; GO:0005856 cytoskeleton; GO:0005929 cilium; GO:0005930 axoneme; GO:0032838 plasma membrane bounded cell projection cytoplasm; GO:0042995 cell projection; GO:0043226 organelle; GO:0043228 non-membrane-bounded organelle; GO:0043229 intracellular organelle; GO:0043232 intracellular non-membrane-bounded organelle; GO:0097014 ciliary…		PF14874	PF14874 Flagellar-associated PapD-like
CGIg04488	639	S	0.607244	0.0193796	Q6Q759 SPG17_HUMAN Sperm-associated antigen 17 OS=Homo sapiens OX=9606 GN=SPAG17 PE=2 SV=1	SPAG17	_EEFMS[Phospho (STY)]T[Phospho (STY)]PS[Phospho (STY)]EER_	1	Up	0.556579	0.658375	0.444804	0.8343	1.04361	0.855357	0.76741	0.9807	0.936705	0.837546	0.746872	0.83525	nucleus	K25533	SPAG17; sperm-associated antigen 17		GO:0000226 microtubule cytoskeleton organization; GO:0001578 microtubule bundle formation; GO:0003341 cilium movement; GO:0003351 epithelial cilium movement involved in extracellular fluid movement; GO:0006996 organelle organization; GO:0007010 cytoskeleton organization; GO:0007017 microtubule-based process; GO:0007018 microtubule-based movement; GO:0009987 cellular process; GO:0016043 cellular c…	GO:0005622 intracellular anatomical structure; GO:0005737 cytoplasm; GO:0005856 cytoskeleton; GO:0005929 cilium; GO:0005930 axoneme; GO:0032838 plasma membrane bounded cell projection cytoplasm; GO:0042995 cell projection; GO:0043226 organelle; GO:0043228 non-membrane-bounded organelle; GO:0043229 intracellular organelle; GO:0043232 intracellular non-membrane-bounded organelle; GO:0097014 ciliary…		PF14874	PF14874 Flagellar-associated PapD-like
CGIg04488	1827	S	0.604773	0.00390588	Q6Q759 SPG17_HUMAN Sperm-associated antigen 17 OS=Homo sapiens OX=9606 GN=SPAG17 PE=2 SV=1	SPAG17	_ATAPPEPS[Phospho (STY)]PPPTPQPK_	1	Up	0.729862	0.729732	0.785354	1.12509	1.14683	1.44014	0.774596	0.857232	0.737228	1.08934	1.02887	0.880774	nucleus	K25533	SPAG17; sperm-associated antigen 17		GO:0000226 microtubule cytoskeleton organization; GO:0001578 microtubule bundle formation; GO:0003341 cilium movement; GO:0003351 epithelial cilium movement involved in extracellular fluid movement; GO:0006996 organelle organization; GO:0007010 cytoskeleton organization; GO:0007017 microtubule-based process; GO:0007018 microtubule-based movement; GO:0009987 cellular process; GO:0016043 cellular c…	GO:0005622 intracellular anatomical structure; GO:0005737 cytoplasm; GO:0005856 cytoskeleton; GO:0005929 cilium; GO:0005930 axoneme; GO:0032838 plasma membrane bounded cell projection cytoplasm; GO:0042995 cell projection; GO:0043226 organelle; GO:0043228 non-membrane-bounded organelle; GO:0043229 intracellular organelle; GO:0043232 intracellular non-membrane-bounded organelle; GO:0097014 ciliary…		PF14874	PF14874 Flagellar-associated PapD-like
CGIg04488	733	S	0.499934	0.00548208	Q6Q759 SPG17_HUMAN Sperm-associated antigen 17 OS=Homo sapiens OX=9606 GN=SPAG17 PE=2 SV=1	SPAG17	_MEKS[Phospho (STY)]PDPS[Phospho (STY)]DR_	1	Up	0.747977	0.489327	0.678283	1.24766	1.32927	1.25475	1.05138	0.917839	1.00902	1.00281	0.861114	0.9131	nucleus	K25533	SPAG17; sperm-associated antigen 17		GO:0000226 microtubule cytoskeleton organization; GO:0001578 microtubule bundle formation; GO:0003341 cilium movement; GO:0003351 epithelial cilium movement involved in extracellular fluid movement; GO:0006996 organelle organization; GO:0007010 cytoskeleton organization; GO:0007017 microtubule-based process; GO:0007018 microtubule-based movement; GO:0009987 cellular process; GO:0016043 cellular c…	GO:0005622 intracellular anatomical structure; GO:0005737 cytoplasm; GO:0005856 cytoskeleton; GO:0005929 cilium; GO:0005930 axoneme; GO:0032838 plasma membrane bounded cell projection cytoplasm; GO:0042995 cell projection; GO:0043226 organelle; GO:0043228 non-membrane-bounded organelle; GO:0043229 intracellular organelle; GO:0043232 intracellular non-membrane-bounded organelle; GO:0097014 ciliary…		PF14874	PF14874 Flagellar-associated PapD-like
CGIg04488	799	S	0.276792	0.0402181	Q6Q759 SPG17_HUMAN Sperm-associated antigen 17 OS=Homo sapiens OX=9606 GN=SPAG17 PE=2 SV=1	SPAG17	_TAEES[Phospho (STY)]MHEIVDAQK_	0.993646	Up	0.211078	0.932785	0.324167	2.27863	1.16415	1.86094	0.313452	0.33106	0.281983	2.25652	1.17539		nucleus	K25533	SPAG17; sperm-associated antigen 17		GO:0000226 microtubule cytoskeleton organization; GO:0001578 microtubule bundle formation; GO:0003341 cilium movement; GO:0003351 epithelial cilium movement involved in extracellular fluid movement; GO:0006996 organelle organization; GO:0007010 cytoskeleton organization; GO:0007017 microtubule-based process; GO:0007018 microtubule-based movement; GO:0009987 cellular process; GO:0016043 cellular c…	GO:0005622 intracellular anatomical structure; GO:0005737 cytoplasm; GO:0005856 cytoskeleton; GO:0005929 cilium; GO:0005930 axoneme; GO:0032838 plasma membrane bounded cell projection cytoplasm; GO:0042995 cell projection; GO:0043226 organelle; GO:0043228 non-membrane-bounded organelle; GO:0043229 intracellular organelle; GO:0043232 intracellular non-membrane-bounded organelle; GO:0097014 ciliary…		PF14874	PF14874 Flagellar-associated PapD-like
CGIg04498	574	S	0.443819	0.000108085	Q5F471 PP6R3_CHICK Serine/threonine-protein phosphatase 6 regulatory subunit 3 OS=Gallus gallus OX=9031 GN=PPP6R3 PE=2 SV=1	PPP6R3	_ADS[Phospho (STY)]PFGDR_	1	Up	0.626299	0.676098	0.63117	1.32688	1.56037	1.4694	0.563166	0.788012	0.720023	1.20424	1.44001	1.11265	nucleus	K15501	PPP6R3, SAPS3; serine/threonine-protein phosphatase 6 regulatory subunit 3		GO:0001932 regulation of protein phosphorylation; GO:0001933 negative regulation of protein phosphorylation; GO:0006810 transport; GO:0006888 endoplasmic reticulum to Golgi vesicle-mediated transport; GO:0006900 vesicle budding from membrane; GO:0006901 vesicle coating; GO:0006903 vesicle targeting; GO:0006996 organelle organization; GO:0009892 negative regulation of metabolic process; GO:0009966…	GO:0005622 intracellular anatomical structure; GO:0005634 nucleus; GO:0005654 nucleoplasm; GO:0005737 cytoplasm; GO:0005829 cytosol; GO:0005886 plasma membrane; GO:0016020 membrane; GO:0031974 membrane-enclosed lumen; GO:0031981 nuclear lumen; GO:0043226 organelle; GO:0043227 membrane-bounded organelle; GO:0043229 intracellular organelle; GO:0043231 intracellular membrane-bounded organelle; GO:00…	GO:0005488 binding; GO:0005515 protein binding; GO:0019899 enzyme binding; GO:0019902 phosphatase binding; GO:0019903 protein phosphatase binding;				D	KOG2073	SAP family cell cycle dependent phosphatase-associated protein
CGIg04498	921	S	0.211334	3.33662e-05	Q5F471 PP6R3_CHICK Serine/threonine-protein phosphatase 6 regulatory subunit 3 OS=Gallus gallus OX=9031 GN=PPP6R3 PE=2 SV=1	PPP6R3	_S[Phospho (STY)]PGHLQGSGDK_	1	Up	0.356113	0.366093	0.315399	1.44572	1.74087	1.72319	0.319631	0.313517	0.300228	1.28206	1.44398	1.56672	nucleus	K15501	PPP6R3, SAPS3; serine/threonine-protein phosphatase 6 regulatory subunit 3		GO:0001932 regulation of protein phosphorylation; GO:0001933 negative regulation of protein phosphorylation; GO:0006810 transport; GO:0006888 endoplasmic reticulum to Golgi vesicle-mediated transport; GO:0006900 vesicle budding from membrane; GO:0006901 vesicle coating; GO:0006903 vesicle targeting; GO:0006996 organelle organization; GO:0009892 negative regulation of metabolic process; GO:0009966…	GO:0005622 intracellular anatomical structure; GO:0005634 nucleus; GO:0005654 nucleoplasm; GO:0005737 cytoplasm; GO:0005829 cytosol; GO:0005886 plasma membrane; GO:0016020 membrane; GO:0031974 membrane-enclosed lumen; GO:0031981 nuclear lumen; GO:0043226 organelle; GO:0043227 membrane-bounded organelle; GO:0043229 intracellular organelle; GO:0043231 intracellular membrane-bounded organelle; GO:00…	GO:0005488 binding; GO:0005515 protein binding; GO:0019899 enzyme binding; GO:0019902 phosphatase binding; GO:0019903 protein phosphatase binding;				D	KOG2073	SAP family cell cycle dependent phosphatase-associated protein
CGIg04550	243	S	0.413494	0.000726451	Q9UNX4 WDR3_HUMAN WD repeat-containing protein 3 OS=Homo sapiens OX=9606 GN=WDR3 PE=1 SV=1	WDR3	_MES[Phospho (STY)]EEEGEDEEEEDEDLHILK_	1	Up	0.619595	0.5055	0.565668	1.19744	1.54433	1.34718	0.488416	0.59714	0.513338	1.25099	1.03139	0.457647	cytoplasm	K14556	DIP2, UTP12, WDR3; U3 small nucleolar RNA-associated protein 12	map03008 Ribosome biogenesis in eukaryotes	GO:0006139 nucleobase-containing compound metabolic process; GO:0006364 rRNA processing; GO:0006396 RNA processing; GO:0006725 cellular aromatic compound metabolic process; GO:0006807 nitrogen compound metabolic process; GO:0008152 metabolic process; GO:0009987 cellular process; GO:0010467 gene expression; GO:0016070 RNA metabolic process; GO:0016072 rRNA metabolic process; GO:0022613 ribonucleop…	GO:0005622 intracellular anatomical structure; GO:0005634 nucleus; GO:0005635 nuclear envelope; GO:0005654 nucleoplasm; GO:0005730 nucleolus; GO:0012505 endomembrane system; GO:0016020 membrane; GO:0030684 preribosome; GO:0030686 90S preribosome; GO:0031090 organelle membrane; GO:0031965 nuclear membrane; GO:0031967 organelle envelope; GO:0031974 membrane-enclosed lumen; GO:0031975 envelope; GO:0…	GO:0003676 nucleic acid binding; GO:0003723 RNA binding; GO:0005488 binding; GO:0030515 snoRNA binding; GO:0097159 organic cyclic compound binding; GO:1901363 heterocyclic compound binding;				A	KOG0306	WD40-repeat-containing subunit of the 18S rRNA processing complex
CGIg04556	63	S	0.579366	0.00477572	XP_011433820.2 uncharacterized protein LOC105332801 isoform X1 [Crassostrea gigas]	--	_APIGALLS[Phospho (STY)]PTDGQR_	1	Up	0.64476	0.5633	0.714886	0.962972	1.17314	1.18294	0.688184	0.442558	0.674451	0.895331	1.07011	1.00524	mitochondria
CGIg04565	799	S	0.512248	0.0275736	Q008S8 ECT2L_HUMAN Epithelial cell-transforming sequence 2 oncogene-like OS=Homo sapiens OX=9606 GN=ECT2L PE=2 SV=2	ECT2L	_VTFGS[Phospho (STY)]MR_	0.999535	Up	0.783037		0.636994	1.48074	1.58097	1.09652	1.04541	1.12677	1.06366	0.943507	0.922104	1.25045	cytoplasm							PF12937; PF00621	PF12937 F-box-like; PF00621 RhoGEF domain		T	KOG3524	Predicted guanine nucleotide exchange factor (PEBBLE)
CGIg04652	309	S	0.642371	0.0138322	O35115 FHL2_RAT Four and a half LIM domains protein 2 OS=Rattus norvegicus OX=10116 GN=Fhl2 PE=1 SV=1	Fhl2	_FIS[Phospho (STY)]FEDR_	1	Up	0.780912	0.748684	0.774444	1.0084	1.14662	1.43175	0.679295	0.658021	0.517547	1.63704	1.40892	1.39157	nucleus				GO:0000122 negative regulation of transcription by RNA polymerase II; GO:0001503 ossification; GO:0001649 osteoblast differentiation; GO:0003007 heart morphogenesis; GO:0003205 cardiac chamber development; GO:0003206 cardiac chamber morphogenesis; GO:0006355 regulation of DNA-templated transcription; GO:0006357 regulation of transcription by RNA polymerase II; GO:0007154 cell communication; GO:00…	GO:0005622 intracellular anatomical structure; GO:0005634 nucleus; GO:0005654 nucleoplasm; GO:0005737 cytoplasm; GO:0030016 myofibril; GO:0030017 sarcomere; GO:0030018 Z disc; GO:0031430 M band; GO:0031672 A band; GO:0031674 I band; GO:0031974 membrane-enclosed lumen; GO:0031981 nuclear lumen; GO:0043226 organelle; GO:0043227 membrane-bounded organelle; GO:0043228 non-membrane-bounded organelle; …	GO:0003712 transcription coregulator activity; GO:0003713 transcription coactivator activity; GO:0005102 signaling receptor binding; GO:0005488 binding; GO:0005515 protein binding; GO:0008134 transcription factor binding; GO:0019904 protein domain specific binding; GO:0042802 identical protein binding; GO:0050681 nuclear androgen receptor binding; GO:0051427 hormone receptor binding; GO:0140110 t…	PF00412	PF00412 LIM domain	PF00412 LIM domain	TZR	KOG1704	FOG: LIM domain
CGIg04652	211	S	0.237171	9.14221e-05	O35115 FHL2_RAT Four and a half LIM domains protein 2 OS=Rattus norvegicus OX=10116 GN=Fhl2 PE=1 SV=1	Fhl2	_NKS[Phospho (STY)]FIPR_	1	Up	0.445445	0.370783	0.506886	1.85181	1.84097	1.88595	0.342771	0.361632	0.387758	2.13581	2.27404	2.15347	nucleus				GO:0000122 negative regulation of transcription by RNA polymerase II; GO:0001503 ossification; GO:0001649 osteoblast differentiation; GO:0003007 heart morphogenesis; GO:0003205 cardiac chamber development; GO:0003206 cardiac chamber morphogenesis; GO:0006355 regulation of DNA-templated transcription; GO:0006357 regulation of transcription by RNA polymerase II; GO:0007154 cell communication; GO:00…	GO:0005622 intracellular anatomical structure; GO:0005634 nucleus; GO:0005654 nucleoplasm; GO:0005737 cytoplasm; GO:0030016 myofibril; GO:0030017 sarcomere; GO:0030018 Z disc; GO:0031430 M band; GO:0031672 A band; GO:0031674 I band; GO:0031974 membrane-enclosed lumen; GO:0031981 nuclear lumen; GO:0043226 organelle; GO:0043227 membrane-bounded organelle; GO:0043228 non-membrane-bounded organelle; …	GO:0003712 transcription coregulator activity; GO:0003713 transcription coactivator activity; GO:0005102 signaling receptor binding; GO:0005488 binding; GO:0005515 protein binding; GO:0008134 transcription factor binding; GO:0019904 protein domain specific binding; GO:0042802 identical protein binding; GO:0050681 nuclear androgen receptor binding; GO:0051427 hormone receptor binding; GO:0140110 t…	PF00412	PF00412 LIM domain	PF00412 LIM domain	TZR	KOG1704	FOG: LIM domain
CGIg04669	671	S	0.437309	0.00820722	P70496 PLD1_RAT Phospholipase D1 OS=Rattus norvegicus OX=10116 GN=Pld1 PE=1 SV=3	Pld1	_DGPSVAEDKEQEIEESDT[Phospho (STY)]ES[Phospho (STY)]VKDMK_	1	Up	0.53609	0.669296	0.975897	1.62017	1.73095	1.63683	0.67331	0.868049	1.45637	1.20536	1.30241	0.803389	nucleus	K01115	PLD1_2; phospholipase D1/2 [EC:3.1.4.4]	map00564 Glycerophospholipid metabolism; map00565 Ether lipid metabolism; map01100 Metabolic pathways; map04014 Ras signaling pathway; map04024 cAMP signaling pathway; map04071 Sphingolipid signaling pathway; map04072 Phospholipase D signaling pathway; map04144 Endocytosis; map04666 Fc gamma R-mediated phagocytosis; map04724 Glutamatergic synapse; map04912 GnRH signaling pathway; map04928 Parathy…				PF00787; PF13091	PF00787 PX domain; PF13091 PLD-like domain		I	KOG1329	Phospholipase D1
CGIg04669	578	S	0.285963	0.00138435	P70496 PLD1_RAT Phospholipase D1 OS=Rattus norvegicus OX=10116 GN=Pld1 PE=1 SV=3	Pld1	_SNS[Phospho (STY)]DPEC[Carbamidomethyl (C)]VC[Carbamidomethyl (C)]GR_	1	Up	0.546152	0.504761	0.813361	2.45429	2.00509	2.05991	0.505426	0.604343	0.763154	1.26785	1.7066	1.47304	nucleus	K01115	PLD1_2; phospholipase D1/2 [EC:3.1.4.4]	map00564 Glycerophospholipid metabolism; map00565 Ether lipid metabolism; map01100 Metabolic pathways; map04014 Ras signaling pathway; map04024 cAMP signaling pathway; map04071 Sphingolipid signaling pathway; map04072 Phospholipase D signaling pathway; map04144 Endocytosis; map04666 Fc gamma R-mediated phagocytosis; map04724 Glutamatergic synapse; map04912 GnRH signaling pathway; map04928 Parathy…				PF00787; PF13091	PF00787 PX domain; PF13091 PLD-like domain		I	KOG1329	Phospholipase D1
CGIg04669	681	S	0.263707	0.000449836	P70496 PLD1_RAT Phospholipase D1 OS=Rattus norvegicus OX=10116 GN=Pld1 PE=1 SV=3	Pld1	_SFGS[Phospho (STY)]RPK_	1	Up	0.518192	0.536523	0.745134	2.43724	2.33782	2.05014	0.764868	0.983617	1.35738	1.57375	1.8521	1.68732	nucleus	K01115	PLD1_2; phospholipase D1/2 [EC:3.1.4.4]	map00564 Glycerophospholipid metabolism; map00565 Ether lipid metabolism; map01100 Metabolic pathways; map04014 Ras signaling pathway; map04024 cAMP signaling pathway; map04071 Sphingolipid signaling pathway; map04072 Phospholipase D signaling pathway; map04144 Endocytosis; map04666 Fc gamma R-mediated phagocytosis; map04724 Glutamatergic synapse; map04912 GnRH signaling pathway; map04928 Parathy…				PF00787; PF13091	PF00787 PX domain; PF13091 PLD-like domain		I	KOG1329	Phospholipase D1
CGIg04669	793	S	0.216112	0.000364704	P70496 PLD1_RAT Phospholipase D1 OS=Rattus norvegicus OX=10116 GN=Pld1 PE=1 SV=3	Pld1	_VAS[Phospho (STY)]DSGILSNR_	1	Up	0.414075	0.465529	0.649934	2.42922	2.43468	2.21364	0.787418	0.869736	1.33117	1.56689	1.55624	1.46055	nucleus	K01115	PLD1_2; phospholipase D1/2 [EC:3.1.4.4]	map00564 Glycerophospholipid metabolism; map00565 Ether lipid metabolism; map01100 Metabolic pathways; map04014 Ras signaling pathway; map04024 cAMP signaling pathway; map04071 Sphingolipid signaling pathway; map04072 Phospholipase D signaling pathway; map04144 Endocytosis; map04666 Fc gamma R-mediated phagocytosis; map04724 Glutamatergic synapse; map04912 GnRH signaling pathway; map04928 Parathy…				PF00787; PF13091	PF00787 PX domain; PF13091 PLD-like domain		I	KOG1329	Phospholipase D1
CGIg04674	684	T	0.322887	0.000237431	P18654 KS6A3_MOUSE Ribosomal protein S6 kinase alpha-3 OS=Mus musculus OX=10090 GN=Rps6ka3 PE=1 SV=2	Rps6ka3	_LT[Phospho (STY)]LQDAQLVK_	1	Up	0.54243	0.508833	0.596874	1.94654	1.66794	1.48989	0.63621	0.616802	0.570445	1.39868	1.22279	1.36267	cytoplasm	K04373	RPS6KA; ribosomal protein S6 kinase alpha-1/2/3/6 [EC:2.7.11.1]	map04010 MAPK signaling pathway; map04114 Oocyte meiosis; map04150 mTOR signaling pathway; map04714 Thermogenesis; map04720 Long-term potentiation; map04722 Neurotrophin signaling pathway; map04914 Progesterone-mediated oocyte maturation	GO:0000003 reproduction; GO:0001501 skeletal system development; GO:0001556 oocyte maturation; GO:0001558 regulation of cell growth; GO:0001889 liver development; GO:0001932 regulation of protein phosphorylation; GO:0001933 negative regulation of protein phosphorylation; GO:0001976 nervous system process involved in regulation of systemic arterial blood pressure; GO:0001990 regulation of systemic…	GO:0001650 fibrillar center; GO:0005622 intracellular anatomical structure; GO:0005634 nucleus; GO:0005654 nucleoplasm; GO:0005730 nucleolus; GO:0005737 cytoplasm; GO:0005739 mitochondrion; GO:0005819 spindle; GO:0005829 cytosol; GO:0005856 cytoskeleton; GO:0015630 microtubule cytoskeleton; GO:0031594 neuromuscular junction; GO:0031974 membrane-enclosed lumen; GO:0031981 nuclear lumen; GO:0036477…	GO:0003824 catalytic activity; GO:0004672 protein kinase activity; GO:0004674 protein serine/threonine kinase activity; GO:0004711 ribosomal protein S6 kinase activity; GO:0004712 protein serine/threonine/tyrosine kinase activity; GO:0004857 enzyme inhibitor activity; GO:0004866 endopeptidase inhibitor activity; GO:0004869 cysteine-type endopeptidase inhibitor activity; GO:0005488 binding; GO:000…	PF00069	PF00069 Protein kinase domain		T	KOG0603	Ribosomal protein S6 kinase
CGIg04674	359	S	0.304143	3.7812e-05	P18654 KS6A3_MOUSE Ribosomal protein S6 kinase alpha-3 OS=Mus musculus OX=10090 GN=Rps6ka3 PE=1 SV=2	Rps6ka3	_TPKDS[Phospho (STY)]PGIPPSATAHELFR_	1	Up	0.352989	0.427739	0.397455	1.33983	1.29117	1.24278	0.26045	0.284109	0.305261	1.02403	0.888274	0.863816	cytoplasm	K04373	RPS6KA; ribosomal protein S6 kinase alpha-1/2/3/6 [EC:2.7.11.1]	map04010 MAPK signaling pathway; map04114 Oocyte meiosis; map04150 mTOR signaling pathway; map04714 Thermogenesis; map04720 Long-term potentiation; map04722 Neurotrophin signaling pathway; map04914 Progesterone-mediated oocyte maturation	GO:0000003 reproduction; GO:0001501 skeletal system development; GO:0001556 oocyte maturation; GO:0001558 regulation of cell growth; GO:0001889 liver development; GO:0001932 regulation of protein phosphorylation; GO:0001933 negative regulation of protein phosphorylation; GO:0001976 nervous system process involved in regulation of systemic arterial blood pressure; GO:0001990 regulation of systemic…	GO:0001650 fibrillar center; GO:0005622 intracellular anatomical structure; GO:0005634 nucleus; GO:0005654 nucleoplasm; GO:0005730 nucleolus; GO:0005737 cytoplasm; GO:0005739 mitochondrion; GO:0005819 spindle; GO:0005829 cytosol; GO:0005856 cytoskeleton; GO:0015630 microtubule cytoskeleton; GO:0031594 neuromuscular junction; GO:0031974 membrane-enclosed lumen; GO:0031981 nuclear lumen; GO:0036477…	GO:0003824 catalytic activity; GO:0004672 protein kinase activity; GO:0004674 protein serine/threonine kinase activity; GO:0004711 ribosomal protein S6 kinase activity; GO:0004712 protein serine/threonine/tyrosine kinase activity; GO:0004857 enzyme inhibitor activity; GO:0004866 endopeptidase inhibitor activity; GO:0004869 cysteine-type endopeptidase inhibitor activity; GO:0005488 binding; GO:000…	PF00069	PF00069 Protein kinase domain		T	KOG0603	Ribosomal protein S6 kinase
CGIg04674	355	T	0.259095	0.00948495	P18654 KS6A3_MOUSE Ribosomal protein S6 kinase alpha-3 OS=Mus musculus OX=10090 GN=Rps6ka3 PE=1 SV=2	Rps6ka3	_T[Phospho (STY)]PKDS[Phospho (STY)]PGIPPSATAHELFR_	1	Up	0.263256	0.576865	0.211705	1.31455	1.24785	1.49721	0.0641894	0.190752	0.155847	1.05395	1.26617	0.90466	cytoplasm	K04373	RPS6KA; ribosomal protein S6 kinase alpha-1/2/3/6 [EC:2.7.11.1]	map04010 MAPK signaling pathway; map04114 Oocyte meiosis; map04150 mTOR signaling pathway; map04714 Thermogenesis; map04720 Long-term potentiation; map04722 Neurotrophin signaling pathway; map04914 Progesterone-mediated oocyte maturation	GO:0000003 reproduction; GO:0001501 skeletal system development; GO:0001556 oocyte maturation; GO:0001558 regulation of cell growth; GO:0001889 liver development; GO:0001932 regulation of protein phosphorylation; GO:0001933 negative regulation of protein phosphorylation; GO:0001976 nervous system process involved in regulation of systemic arterial blood pressure; GO:0001990 regulation of systemic…	GO:0001650 fibrillar center; GO:0005622 intracellular anatomical structure; GO:0005634 nucleus; GO:0005654 nucleoplasm; GO:0005730 nucleolus; GO:0005737 cytoplasm; GO:0005739 mitochondrion; GO:0005819 spindle; GO:0005829 cytosol; GO:0005856 cytoskeleton; GO:0015630 microtubule cytoskeleton; GO:0031594 neuromuscular junction; GO:0031974 membrane-enclosed lumen; GO:0031981 nuclear lumen; GO:0036477…	GO:0003824 catalytic activity; GO:0004672 protein kinase activity; GO:0004674 protein serine/threonine kinase activity; GO:0004711 ribosomal protein S6 kinase activity; GO:0004712 protein serine/threonine/tyrosine kinase activity; GO:0004857 enzyme inhibitor activity; GO:0004866 endopeptidase inhibitor activity; GO:0004869 cysteine-type endopeptidase inhibitor activity; GO:0005488 binding; GO:000…	PF00069	PF00069 Protein kinase domain		T	KOG0603	Ribosomal protein S6 kinase
CGIg04706	490	S	0.512025	0.00213763	XP_011439698.2 uncharacterized protein LOC105336912 [Crassostrea gigas]	--	_S[Phospho (STY)]FVLDFETC[Carbamidomethyl (C)]ER_	1	Up	0.875061	0.901895	0.937647	1.71032	2.07603	1.51535	0.908749	0.957655	1.04967	1.30778	1.09562	1.25672	nucleus	K02159	BAX; apoptosis regulator BAX	map04071 Sphingolipid signaling pathway; map04115 p53 signaling pathway; map04141 Protein processing in endoplasmic reticulum; map04210 Apoptosis; map04211 Longevity regulating pathway; map04215 Apoptosis - multiple species; map04217 Necroptosis; map04722 Neurotrophin signaling pathway
CGIg04717	132	T	0.174725	0.000492794	Q9NQZ6 ZC4H2_HUMAN Zinc finger C4H2 domain-containing protein OS=Homo sapiens OX=9606 GN=ZC4H2 PE=1 SV=1	ZC4H2	_LPDLQEEEEKLT[Phospho (STY)]PDFFEK_	1	Up	0.182866	0.234367		1.15975	1.12963	1.29254	0.229609	0.266425	0.219057	0.789243	0.896187	1.59136	nucleus	K24369	ZC4H2; zinc finger C4H2 domain-contaning protein		GO:0001708 cell fate specification; GO:0002009 morphogenesis of an epithelium; GO:0002119 nematode larval development; GO:0002164 larval development; GO:0007155 cell adhesion; GO:0007275 multicellular organism development; GO:0007399 nervous system development; GO:0007417 central nervous system development; GO:0007528 neuromuscular junction development; GO:0008544 epidermis development; GO:000965…	GO:0005622 intracellular anatomical structure; GO:0005634 nucleus; GO:0005654 nucleoplasm; GO:0005737 cytoplasm; GO:0005886 plasma membrane; GO:0016020 membrane; GO:0016604 nuclear body; GO:0016607 nuclear speck; GO:0031974 membrane-enclosed lumen; GO:0031981 nuclear lumen; GO:0043226 organelle; GO:0043227 membrane-bounded organelle; GO:0043229 intracellular organelle; GO:0043231 intracellular me…					S	KOG4451	Uncharacterized conserved protein (tumor-associated antigen HCA127 in humans)
CGIg04720	589	S	0.269506	0.000401846	Q6NV72 WDCP_MOUSE WD repeat and coiled-coil-containing protein OS=Mus musculus OX=10090 GN=Wdcp PE=2 SV=2	Wdcp	_SISVES[Phospho (STY)]DLETEK_	1	Up	0.404461	0.506317	0.49782	1.9367	1.86205	1.42784	0.394602	0.365182	0.384015	1.46059	1.48723	1.47536	nucleus				GO:0009987 cellular process; GO:0016043 cellular component organization; GO:0022607 cellular component assembly; GO:0043933 protein-containing complex organization; GO:0044085 cellular component biogenesis; GO:0051259 protein complex oligomerization; GO:0065003 protein-containing complex assembly; GO:0071840 cellular component organization or biogenesis;		GO:0005488 binding; GO:0005515 protein binding; GO:0019899 enzyme binding; GO:0019900 kinase binding;
CGIg04749	12	T	0.178689	2.87818e-05	Q56A18 SMCE1_RAT SWI/SNF-related matrix-associated actin-dependent regulator of chromatin subfamily E member 1 OS=Rattus norvegicus OX=10116 GN=Smarce1 PE=1 SV=1	Smarce1	_SIQQT[Phospho (STY)]PPPPASR_	1	Up	0.348521	0.327114	0.420127	2.02111	2.16291	1.94822	0.440048	0.549551	0.404759	1.88067	2.21259	1.58053	nucleus	K11651	SMARCE1; SWI/SNF-related matrix-associated actin-dependent regulator of chromatin subfamily E member 1	map04714 Thermogenesis	GO:0000003 reproduction; GO:0003006 developmental process involved in reproduction; GO:0006325 chromatin organization; GO:0006337 nucleosome disassembly; GO:0006338 chromatin remodeling; GO:0006355 regulation of DNA-templated transcription; GO:0006357 regulation of transcription by RNA polymerase II; GO:0006996 organelle organization; GO:0007275 multicellular organism development; GO:0007276 game…	GO:0000228 nuclear chromosome; GO:0000785 chromatin; GO:0005622 intracellular anatomical structure; GO:0005634 nucleus; GO:0005654 nucleoplasm; GO:0005694 chromosome; GO:0016514 SWI/SNF complex; GO:0016586 RSC-type complex; GO:0017053 transcription repressor complex; GO:0031974 membrane-enclosed lumen; GO:0031981 nuclear lumen; GO:0032991 protein-containing complex; GO:0035060 brahma complex; GO:…	GO:0000981 DNA-binding transcription factor activity, RNA polymerase II-specific; GO:0003676 nucleic acid binding; GO:0003677 DNA binding; GO:0003682 chromatin binding; GO:0003700 DNA-binding transcription factor activity; GO:0003712 transcription coregulator activity; GO:0003713 transcription coactivator activity; GO:0003723 RNA binding; GO:0003824 catalytic activity; GO:0005102 signaling recept…	PF00505; PF00096	PF00505 HMG (high mobility group) box; PF00096 Zinc finger, C2H2 type		B	KOG4715	SWI/SNF-related matrix-associated actin-dependent regulator of chromatin
CGIg04749	29	S	0.129432	2.81467e-05	Q56A18 SMCE1_RAT SWI/SNF-related matrix-associated actin-dependent regulator of chromatin subfamily E member 1 OS=Rattus norvegicus OX=10116 GN=Smarce1 PE=1 SV=1	Smarce1	_NAPS[Phospho (STY)]PFVPSSHGHPAFNPVK_	1	Up	0.327551	0.32703	0.252761	2.22096	2.53498	2.25424	0.329297	0.36951	0.340763	1.7602	1.87683	1.91852	nucleus	K11651	SMARCE1; SWI/SNF-related matrix-associated actin-dependent regulator of chromatin subfamily E member 1	map04714 Thermogenesis	GO:0000003 reproduction; GO:0003006 developmental process involved in reproduction; GO:0006325 chromatin organization; GO:0006337 nucleosome disassembly; GO:0006338 chromatin remodeling; GO:0006355 regulation of DNA-templated transcription; GO:0006357 regulation of transcription by RNA polymerase II; GO:0006996 organelle organization; GO:0007275 multicellular organism development; GO:0007276 game…	GO:0000228 nuclear chromosome; GO:0000785 chromatin; GO:0005622 intracellular anatomical structure; GO:0005634 nucleus; GO:0005654 nucleoplasm; GO:0005694 chromosome; GO:0016514 SWI/SNF complex; GO:0016586 RSC-type complex; GO:0017053 transcription repressor complex; GO:0031974 membrane-enclosed lumen; GO:0031981 nuclear lumen; GO:0032991 protein-containing complex; GO:0035060 brahma complex; GO:…	GO:0000981 DNA-binding transcription factor activity, RNA polymerase II-specific; GO:0003676 nucleic acid binding; GO:0003677 DNA binding; GO:0003682 chromatin binding; GO:0003700 DNA-binding transcription factor activity; GO:0003712 transcription coregulator activity; GO:0003713 transcription coactivator activity; GO:0003723 RNA binding; GO:0003824 catalytic activity; GO:0005102 signaling recept…	PF00505; PF00096	PF00505 HMG (high mobility group) box; PF00096 Zinc finger, C2H2 type		B	KOG4715	SWI/SNF-related matrix-associated actin-dependent regulator of chromatin
CGIg04866	424	T	0.540294	4.90674e-05	Q91V92 ACLY_MOUSE ATP-citrate synthase OS=Mus musculus OX=10090 GN=Acly PE=1 SV=1	Acly	_EIPHT[Phospho (STY)]PR_	1	Up	0.660355	0.621537	0.689563	1.21921	1.24366	1.18598	0.793482	0.756436	0.775483	0.965918	0.937585	0.891846	cytoplasm	K01648	ACLY; ATP citrate (pro-S)-lyase [EC:2.3.3.8]	map00020 Citrate cycle (TCA cycle); map01100 Metabolic pathways	GO:0001775 cell activation; GO:0002252 immune effector process; GO:0002263 cell activation involved in immune response; GO:0002274 myeloid leukocyte activation; GO:0002275 myeloid cell activation involved in immune response; GO:0002283 neutrophil activation involved in immune response; GO:0002366 leukocyte activation involved in immune response; GO:0002376 immune system process; GO:0002443 leukoc…	GO:0000323 lytic vacuole; GO:0005576 extracellular region; GO:0005622 intracellular anatomical structure; GO:0005634 nucleus; GO:0005654 nucleoplasm; GO:0005737 cytoplasm; GO:0005764 lysosome; GO:0005766 primary lysosome; GO:0005773 vacuole; GO:0005775 vacuolar lumen; GO:0005829 cytosol; GO:0005886 plasma membrane; GO:0009346 ATP-independent citrate lyase complex; GO:0012505 endomembrane system; …	GO:0000166 nucleotide binding; GO:0003824 catalytic activity; GO:0003878 ATP citrate synthase activity; GO:0005488 binding; GO:0005524 ATP binding; GO:0016740 transferase activity; GO:0016746 acyltransferase activity; GO:0017076 purine nucleotide binding; GO:0030554 adenyl nucleotide binding; GO:0032553 ribonucleotide binding; GO:0032555 purine ribonucleotide binding; GO:0032559 adenyl ribonucleo…	PF08442; PF16114; PF02629; PF00549; PF00285	PF08442 ATP-grasp domain; PF16114 ATP citrate lyase citrate-binding; PF02629 CoA binding domain; PF00549 CoA-ligase; PF00285 Citrate synthase, C-terminal domain		C	KOG1254	ATP-citrate lyase
CGIg04884	54	S	0.453697	0.000193033	Q60598 SRC8_MOUSE Src substrate cortactin OS=Mus musculus OX=10090 GN=Cttn PE=1 SV=2	Cttn	_GS[Phospho (STY)]LNLDQLR_	1	Up	0.632283	0.585738	0.560508	1.3505	1.38535	1.18423	0.787585	0.603341	0.791095	1.45965	1.74117	1.34448	nucleus	K06106	CTTN, EMS1; cortactin	map04530 Tight junction	GO:0000003 reproduction; GO:0000902 cell morphogenesis; GO:0001558 regulation of cell growth; GO:0001667 ameboidal-type cell migration; GO:0002064 epithelial cell development; GO:0002065 columnar/cuboidal epithelial cell differentiation; GO:0002066 columnar/cuboidal epithelial cell development; GO:0003006 developmental process involved in reproduction; GO:0006810 transport; GO:0006886 intracellul…	GO:0001726 ruffle; GO:0002102 podosome; GO:0005622 intracellular anatomical structure; GO:0005737 cytoplasm; GO:0005794 Golgi apparatus; GO:0005819 spindle; GO:0005829 cytosol; GO:0005856 cytoskeleton; GO:0005886 plasma membrane; GO:0005905 clathrin-coated pit; GO:0005938 cell cortex; GO:0012505 endomembrane system; GO:0015629 actin cytoskeleton; GO:0015630 microtubule cytoskeleton; GO:0016020 me…	GO:0005488 binding; GO:0005515 protein binding; GO:0005522 profilin binding; GO:0044877 protein-containing complex binding; GO:0070064 proline-rich region binding; GO:0071933 Arp2/3 complex binding;	PF00018	PF00018 SH3 domain
CGIg04884	70	S	0.450478	8.31812e-06	Q60598 SRC8_MOUSE Src substrate cortactin OS=Mus musculus OX=10090 GN=Cttn PE=1 SV=2	Cttn	_QEVSTDDKS[Phospho (STY)]VK_	1	Up	0.731808	0.760514	0.697137	1.65555	1.60041	1.60435		0.700333	0.721447		1.54879	1.46886	nucleus	K06106	CTTN, EMS1; cortactin	map04530 Tight junction	GO:0000003 reproduction; GO:0000902 cell morphogenesis; GO:0001558 regulation of cell growth; GO:0001667 ameboidal-type cell migration; GO:0002064 epithelial cell development; GO:0002065 columnar/cuboidal epithelial cell differentiation; GO:0002066 columnar/cuboidal epithelial cell development; GO:0003006 developmental process involved in reproduction; GO:0006810 transport; GO:0006886 intracellul…	GO:0001726 ruffle; GO:0002102 podosome; GO:0005622 intracellular anatomical structure; GO:0005737 cytoplasm; GO:0005794 Golgi apparatus; GO:0005819 spindle; GO:0005829 cytosol; GO:0005856 cytoskeleton; GO:0005886 plasma membrane; GO:0005905 clathrin-coated pit; GO:0005938 cell cortex; GO:0012505 endomembrane system; GO:0015629 actin cytoskeleton; GO:0015630 microtubule cytoskeleton; GO:0016020 me…	GO:0005488 binding; GO:0005515 protein binding; GO:0005522 profilin binding; GO:0044877 protein-containing complex binding; GO:0070064 proline-rich region binding; GO:0071933 Arp2/3 complex binding;	PF00018	PF00018 SH3 domain
CGIg04884	189	S	0.450458	0.0192303	Q60598 SRC8_MOUSE Src substrate cortactin OS=Mus musculus OX=10090 GN=Cttn PE=1 SV=2	Cttn	_LEKHES[Phospho (STY)]QQDYSK_	1	Up	0.911443	0.583969	0.581763	1.12713	1.63123	1.85289	0.451204	0.532165	0.567026	1.85757	2.78685	2.05495	nucleus	K06106	CTTN, EMS1; cortactin	map04530 Tight junction	GO:0000003 reproduction; GO:0000902 cell morphogenesis; GO:0001558 regulation of cell growth; GO:0001667 ameboidal-type cell migration; GO:0002064 epithelial cell development; GO:0002065 columnar/cuboidal epithelial cell differentiation; GO:0002066 columnar/cuboidal epithelial cell development; GO:0003006 developmental process involved in reproduction; GO:0006810 transport; GO:0006886 intracellul…	GO:0001726 ruffle; GO:0002102 podosome; GO:0005622 intracellular anatomical structure; GO:0005737 cytoplasm; GO:0005794 Golgi apparatus; GO:0005819 spindle; GO:0005829 cytosol; GO:0005856 cytoskeleton; GO:0005886 plasma membrane; GO:0005905 clathrin-coated pit; GO:0005938 cell cortex; GO:0012505 endomembrane system; GO:0015629 actin cytoskeleton; GO:0015630 microtubule cytoskeleton; GO:0016020 me…	GO:0005488 binding; GO:0005515 protein binding; GO:0005522 profilin binding; GO:0044877 protein-containing complex binding; GO:0070064 proline-rich region binding; GO:0071933 Arp2/3 complex binding;	PF00018	PF00018 SH3 domain
CGIg04884	263	S	0.237476	0.0471465	Q60598 SRC8_MOUSE Src substrate cortactin OS=Mus musculus OX=10090 GN=Cttn PE=1 SV=2	Cttn	_SALGYEHHEQVDKHES[Phospho (STY)]QK_	1	Up	0.573274	0.162681	0.422044	0.802932	2.63465	1.43869	0.238764	0.35821		3.27431	2.69467	2.10189	nucleus	K06106	CTTN, EMS1; cortactin	map04530 Tight junction	GO:0000003 reproduction; GO:0000902 cell morphogenesis; GO:0001558 regulation of cell growth; GO:0001667 ameboidal-type cell migration; GO:0002064 epithelial cell development; GO:0002065 columnar/cuboidal epithelial cell differentiation; GO:0002066 columnar/cuboidal epithelial cell development; GO:0003006 developmental process involved in reproduction; GO:0006810 transport; GO:0006886 intracellul…	GO:0001726 ruffle; GO:0002102 podosome; GO:0005622 intracellular anatomical structure; GO:0005737 cytoplasm; GO:0005794 Golgi apparatus; GO:0005819 spindle; GO:0005829 cytosol; GO:0005856 cytoskeleton; GO:0005886 plasma membrane; GO:0005905 clathrin-coated pit; GO:0005938 cell cortex; GO:0012505 endomembrane system; GO:0015629 actin cytoskeleton; GO:0015630 microtubule cytoskeleton; GO:0016020 me…	GO:0005488 binding; GO:0005515 protein binding; GO:0005522 profilin binding; GO:0044877 protein-containing complex binding; GO:0070064 proline-rich region binding; GO:0071933 Arp2/3 complex binding;	PF00018	PF00018 SH3 domain
CGIg04884	337	S	0.173709	8.6542e-06	Q60598 SRC8_MOUSE Src substrate cortactin OS=Mus musculus OX=10090 GN=Cttn PE=1 SV=2	Cttn	_VALHPS[Phospho (STY)]QTDMSK_	1	Up	0.380404	0.319888	0.381293	2.10073	2.00229	2.12338	0.565624	0.529519	0.602015	2.46162	2.36279	1.5434	nucleus	K06106	CTTN, EMS1; cortactin	map04530 Tight junction	GO:0000003 reproduction; GO:0000902 cell morphogenesis; GO:0001558 regulation of cell growth; GO:0001667 ameboidal-type cell migration; GO:0002064 epithelial cell development; GO:0002065 columnar/cuboidal epithelial cell differentiation; GO:0002066 columnar/cuboidal epithelial cell development; GO:0003006 developmental process involved in reproduction; GO:0006810 transport; GO:0006886 intracellul…	GO:0001726 ruffle; GO:0002102 podosome; GO:0005622 intracellular anatomical structure; GO:0005737 cytoplasm; GO:0005794 Golgi apparatus; GO:0005819 spindle; GO:0005829 cytosol; GO:0005856 cytoskeleton; GO:0005886 plasma membrane; GO:0005905 clathrin-coated pit; GO:0005938 cell cortex; GO:0012505 endomembrane system; GO:0015629 actin cytoskeleton; GO:0015630 microtubule cytoskeleton; GO:0016020 me…	GO:0005488 binding; GO:0005515 protein binding; GO:0005522 profilin binding; GO:0044877 protein-containing complex binding; GO:0070064 proline-rich region binding; GO:0071933 Arp2/3 complex binding;	PF00018	PF00018 SH3 domain
CGIg04885	464	S	0.489804	4.22951e-05	Q14432 PDE3A_HUMAN cGMP-inhibited 3',5'-cyclic phosphodiesterase A OS=Homo sapiens OX=9606 GN=PDE3A PE=1 SV=3	PDE3A	_SRS[Phospho (STY)]FSLVAPVPIGGSHPK_	0.999986	Up	0.711153	0.775301	0.76938	1.54712	1.46514	1.59332	0.953086	0.451481	0.791011	2.10274	2.10367	1.7847	plasma membrane	K19021	PDE3A; cGMP-inhibited 3',5'-cyclic phosphodiesterase A [EC:3.1.4.17]	map00230 Purine metabolism; map01100 Metabolic pathways; map04022 cGMP-PKG signaling pathway; map04024 cAMP signaling pathway; map04924 Renin secretion	GO:0000003 reproduction; GO:0001556 oocyte maturation; GO:0002791 regulation of peptide secretion; GO:0002792 negative regulation of peptide secretion; GO:0003006 developmental process involved in reproduction; GO:0003008 system process; GO:0003013 circulatory system process; GO:0003018 vascular process in circulatory system; GO:0006139 nucleobase-containing compound metabolic process; GO:0006163…	GO:0005622 intracellular anatomical structure; GO:0005737 cytoplasm; GO:0005783 endoplasmic reticulum; GO:0005794 Golgi apparatus; GO:0005829 cytosol; GO:0012505 endomembrane system; GO:0016020 membrane; GO:0032045 guanyl-nucleotide exchange factor complex; GO:0032991 protein-containing complex; GO:0043226 organelle; GO:0043227 membrane-bounded organelle; GO:0043229 intracellular organelle; GO:00…	GO:0000166 nucleotide binding; GO:0003824 catalytic activity; GO:0004112 cyclic-nucleotide phosphodiesterase activity; GO:0004114 3',5'-cyclic-nucleotide phosphodiesterase activity; GO:0004115 3',5'-cyclic-AMP phosphodiesterase activity; GO:0004119 cGMP-inhibited cyclic-nucleotide phosphodiesterase activity; GO:0005488 binding; GO:0005515 protein binding; GO:0008081 phosphoric diester hydrolase a…	PF00233	PF00233 3'5'-cyclic nucleotide phosphodiesterase		T	KOG1229	3'5'-cyclic nucleotide phosphodiesterases
CGIg04885	357	S	0.369657	0.0385378	Q14432 PDE3A_HUMAN cGMP-inhibited 3',5'-cyclic phosphodiesterase A OS=Homo sapiens OX=9606 GN=PDE3A PE=1 SV=3	PDE3A	_TRVS[Phospho (STY)]PLVSLTESTNYGSDTEENPYTGERPSSK_	0.994183	Up	0.112585	0.195487		0.45839	0.491399	0.300311			2.9629	1.51522	0.558592	1.04642	plasma membrane	K19021	PDE3A; cGMP-inhibited 3',5'-cyclic phosphodiesterase A [EC:3.1.4.17]	map00230 Purine metabolism; map01100 Metabolic pathways; map04022 cGMP-PKG signaling pathway; map04024 cAMP signaling pathway; map04924 Renin secretion	GO:0000003 reproduction; GO:0001556 oocyte maturation; GO:0002791 regulation of peptide secretion; GO:0002792 negative regulation of peptide secretion; GO:0003006 developmental process involved in reproduction; GO:0003008 system process; GO:0003013 circulatory system process; GO:0003018 vascular process in circulatory system; GO:0006139 nucleobase-containing compound metabolic process; GO:0006163…	GO:0005622 intracellular anatomical structure; GO:0005737 cytoplasm; GO:0005783 endoplasmic reticulum; GO:0005794 Golgi apparatus; GO:0005829 cytosol; GO:0012505 endomembrane system; GO:0016020 membrane; GO:0032045 guanyl-nucleotide exchange factor complex; GO:0032991 protein-containing complex; GO:0043226 organelle; GO:0043227 membrane-bounded organelle; GO:0043229 intracellular organelle; GO:00…	GO:0000166 nucleotide binding; GO:0003824 catalytic activity; GO:0004112 cyclic-nucleotide phosphodiesterase activity; GO:0004114 3',5'-cyclic-nucleotide phosphodiesterase activity; GO:0004115 3',5'-cyclic-AMP phosphodiesterase activity; GO:0004119 cGMP-inhibited cyclic-nucleotide phosphodiesterase activity; GO:0005488 binding; GO:0005515 protein binding; GO:0008081 phosphoric diester hydrolase a…	PF00233	PF00233 3'5'-cyclic nucleotide phosphodiesterase		T	KOG1229	3'5'-cyclic nucleotide phosphodiesterases
CGIg04890	86	S	0.308516	9.56816e-05	Q9CXP4 RHG08_MOUSE Rho GTPase-activating protein 8 OS=Mus musculus OX=10090 GN=Arhgap8 PE=2 SV=3	Arhgap8	_EGS[Phospho (STY)]DGPAPFR_	1	Up	0.567813	0.520585	0.466166	1.80918	1.69771	1.53196	0.561751	0.579288	0.507616	2.19231	1.74373	2.029	cytoplasm	K20633	ARHGAP8, BPGAP1; Rho GTPase-activating protein 8		GO:0000041 transition metal ion transport; GO:0001703 gastrulation with mouth forming first; GO:0001932 regulation of protein phosphorylation; GO:0001934 positive regulation of protein phosphorylation; GO:0002009 morphogenesis of an epithelium; GO:0002165 instar larval or pupal development; GO:0006810 transport; GO:0006811 monoatomic ion transport; GO:0006812 monoatomic cation transport; GO:00068…	GO:0001726 ruffle; GO:0005622 intracellular anatomical structure; GO:0005737 cytoplasm; GO:0005768 endosome; GO:0005769 early endosome; GO:0005829 cytosol; GO:0005886 plasma membrane; GO:0010008 endosome membrane; GO:0012505 endomembrane system; GO:0016020 membrane; GO:0031090 organelle membrane; GO:0031252 cell leading edge; GO:0031410 cytoplasmic vesicle; GO:0031932 TORC2 complex; GO:0031982 ve…	GO:0005096 GTPase activator activity; GO:0005488 binding; GO:0005515 protein binding; GO:0008047 enzyme activator activity; GO:0019899 enzyme binding; GO:0030234 enzyme regulator activity; GO:0030674 protein-macromolecule adaptor activity; GO:0030695 GTPase regulator activity; GO:0031267 small GTPase binding; GO:0035591 signaling adaptor activity; GO:0051020 GTPase binding; GO:0060090 molecular a…	PF13716; PF00620	PF13716 Divergent CRAL/TRIO domain; PF00620 RhoGAP domain		TZ	KOG4406	CDC42 Rho GTPase-activating protein
CGIg04892	1059	S	0.575374	0.00158923	E9Q8T7 DYH1_MOUSE Dynein axonemal heavy chain 1 OS=Mus musculus OX=10090 GN=Dnah1 PE=1 SV=1	Dnah1	_HWDQLS[Phospho (STY)]NDIGFPVRPK_	1	Up	0.869621	0.932635	0.849296	1.39725	1.74031	1.47084	0.721037	0.401449	0.807682	1.65885	1.80061	1.85827	nucleus	K10408	DNAH; dynein axonemal heavy chain		GO:0000003 reproduction; GO:0000226 microtubule cytoskeleton organization; GO:0001539 cilium or flagellum-dependent cell motility; GO:0001578 microtubule bundle formation; GO:0003006 developmental process involved in reproduction; GO:0003341 cilium movement; GO:0003351 epithelial cilium movement involved in extracellular fluid movement; GO:0006996 organelle organization; GO:0007010 cytoskeleton o…	GO:0005622 intracellular anatomical structure; GO:0005737 cytoplasm; GO:0005856 cytoskeleton; GO:0005858 axonemal dynein complex; GO:0005875 microtubule associated complex; GO:0005929 cilium; GO:0005930 axoneme; GO:0015630 microtubule cytoskeleton; GO:0030286 dynein complex; GO:0031514 motile cilium; GO:0032838 plasma membrane bounded cell projection cytoplasm; GO:0032991 protein-containing compl…	GO:0003774 cytoskeletal motor activity; GO:0003777 microtubule motor activity; GO:0003824 catalytic activity; GO:0005488 binding; GO:0005515 protein binding; GO:0008569 minus-end-directed microtubule motor activity; GO:0016462 pyrophosphatase activity; GO:0016787 hydrolase activity; GO:0016817 hydrolase activity, acting on acid anhydrides; GO:0016818 hydrolase activity, acting on acid anhydrides,…	PF12774; PF17852; PF12775; PF17857; PF12780; PF12777; PF12781; PF03028; PF18198; PF18199	PF12774 Hydrolytic ATP binding site of dynein motor region; PF17852 Dynein heavy chain AAA lid domain; PF12775 P-loop containing dynein motor region; PF17857 AAA+ lid domain; PF12780 P-loop containing dynein motor region D4; PF12777 Microtubule-binding stalk of dynein motor; PF12781 ATP-binding dynein motor region; PF03028 Dynein heavy chain region D6 P-loop domain ; PF18198 Dynein heavy chain AA…		Z	KOG3595	Dyneins, heavy chain
CGIg04902	57	T	0.548163	0.000434617	A8E4N3 RSPH3_BOVIN Radial spoke head protein 3 homolog OS=Bos taurus OX=9913 GN=RSPH3 PE=2 SV=1	RSPH3	_GNT[Phospho (STY)]YAQHTLPAHAQPDPIEIQR_	1	Up	0.870838	0.810045	0.868695	1.65814	1.59216	1.40083	0.772178		1.08313	1.35895	1.51423	1.7043	nucleus	K23965	RSPH3; radial spoke head protein 3		GO:0007017 microtubule-based process; GO:0009987 cellular process;	GO:0005622 intracellular anatomical structure; GO:0005856 cytoskeleton; GO:0005875 microtubule associated complex; GO:0005929 cilium; GO:0015630 microtubule cytoskeleton; GO:0032991 protein-containing complex; GO:0042995 cell projection; GO:0043226 organelle; GO:0043228 non-membrane-bounded organelle; GO:0043229 intracellular organelle; GO:0043232 intracellular non-membrane-bounded organelle; GO:…	GO:0005488 binding; GO:0005515 protein binding; GO:0008017 microtubule binding; GO:0008092 cytoskeletal protein binding; GO:0015631 tubulin binding;
CGIg04919	147	T	0.489814	0.00236936	Q9Y5B6 PAXB1_HUMAN PAX3- and PAX7-binding protein 1 OS=Homo sapiens OX=9606 GN=PAXBP1 PE=1 SV=2	PAXBP1	_EEFQT[Phospho (STY)]MNGDDLEENESEEETEGGNQLK_	0.999984	Up	0.572716	0.572979	0.728757	1.18428	1.19135	1.45123		2.32222		1.145		1.11388	nucleus	K13211	GCFC; GC-rich sequence DNA-binding factor		GO:0000122 negative regulation of transcription by RNA polymerase II; GO:0000375 RNA splicing, via transesterification reactions; GO:0000377 RNA splicing, via transesterification reactions with bulged adenosine as nucleophile; GO:0000398 mRNA splicing, via spliceosome; GO:0006139 nucleobase-containing compound metabolic process; GO:0006355 regulation of DNA-templated transcription; GO:0006357 reg…	GO:0005622 intracellular anatomical structure; GO:0005634 nucleus; GO:0043226 organelle; GO:0043227 membrane-bounded organelle; GO:0043229 intracellular organelle; GO:0043231 intracellular membrane-bounded organelle;	GO:0000976 transcription cis-regulatory region binding; GO:0000977 RNA polymerase II transcription regulatory region sequence-specific DNA binding; GO:0000978 RNA polymerase II cis-regulatory region sequence-specific DNA binding; GO:0000981 DNA-binding transcription factor activity, RNA polymerase II-specific; GO:0000987 cis-regulatory region sequence-specific DNA binding; GO:0001067 transcriptio…				K	KOG2136	Transcriptional regulators binding to the GC-rich sequences
CGIg04919	130	S	0.400614	0.000896585	Q9Y5B6 PAXB1_HUMAN PAX3- and PAX7-binding protein 1 OS=Homo sapiens OX=9606 GN=PAXBP1 PE=1 SV=2	PAXBP1	_EES[Phospho (STY)]LEDRDEEIR_	1	Up	0.495271	0.609468	0.442754	1.21129	1.24674	1.40478	0.430633	0.4694	0.394611	1.3494	1.37335	1.56338	nucleus	K13211	GCFC; GC-rich sequence DNA-binding factor		GO:0000122 negative regulation of transcription by RNA polymerase II; GO:0000375 RNA splicing, via transesterification reactions; GO:0000377 RNA splicing, via transesterification reactions with bulged adenosine as nucleophile; GO:0000398 mRNA splicing, via spliceosome; GO:0006139 nucleobase-containing compound metabolic process; GO:0006355 regulation of DNA-templated transcription; GO:0006357 reg…	GO:0005622 intracellular anatomical structure; GO:0005634 nucleus; GO:0043226 organelle; GO:0043227 membrane-bounded organelle; GO:0043229 intracellular organelle; GO:0043231 intracellular membrane-bounded organelle;	GO:0000976 transcription cis-regulatory region binding; GO:0000977 RNA polymerase II transcription regulatory region sequence-specific DNA binding; GO:0000978 RNA polymerase II cis-regulatory region sequence-specific DNA binding; GO:0000981 DNA-binding transcription factor activity, RNA polymerase II-specific; GO:0000987 cis-regulatory region sequence-specific DNA binding; GO:0001067 transcriptio…				K	KOG2136	Transcriptional regulators binding to the GC-rich sequences
CGIg04920	512	S	0.593404	0.00633295	O43318 M3K7_HUMAN Mitogen-activated protein kinase kinase kinase 7 OS=Homo sapiens OX=9606 GN=MAP3K7 PE=1 SV=1	MAP3K7	_SIS[Phospho (STY)]HTPPEAER_	1	Up	0.608157	0.716702	0.634238	1.28314	1.05927	0.959047	0.474371	0.387793	0.397866	0.774228	0.837598	0.974131	nucleus	K04427	MAP3K7, TAK1; mitogen-activated protein kinase kinase kinase 7 [EC:2.7.11.25]	map04010 MAPK signaling pathway; map04013 MAPK signaling pathway - fly; map04064 NF-kappa B signaling pathway; map04140 Autophagy - animal; map04152 AMPK signaling pathway; map04214 Apoptosis - fly; map04310 Wnt signaling pathway; map04380 Osteoclast differentiation; map04520 Adherens junction; map04613 Neutrophil extracellular trap formation; map04620 Toll-like receptor signaling pathway; map046…	GO:0000165 MAPK cascade; GO:0001525 angiogenesis; GO:0001568 blood vessel development; GO:0001654 eye development; GO:0001700 embryonic development via the syncytial blastoderm; GO:0001704 formation of primary germ layer; GO:0001706 endoderm formation; GO:0001708 cell fate specification; GO:0001709 cell fate determination; GO:0001711 endodermal cell fate commitment; GO:0001714 endodermal cell fat…	GO:0000123 histone acetyltransferase complex; GO:0005622 intracellular anatomical structure; GO:0005634 nucleus; GO:0005654 nucleoplasm; GO:0005737 cytoplasm; GO:0005768 endosome; GO:0005829 cytosol; GO:0010008 endosome membrane; GO:0012505 endomembrane system; GO:0014069 postsynaptic density; GO:0016020 membrane; GO:0031090 organelle membrane; GO:0031248 protein acetyltransferase complex; GO:003…	GO:0000166 nucleotide binding; GO:0003824 catalytic activity; GO:0004672 protein kinase activity; GO:0004674 protein serine/threonine kinase activity; GO:0004706 JUN kinase kinase kinase activity; GO:0004708 MAP kinase kinase activity; GO:0004709 MAP kinase kinase kinase activity; GO:0004712 protein serine/threonine/tyrosine kinase activity; GO:0005102 signaling receptor binding; GO:0005488 bindi…	PF07714	PF07714 Protein tyrosine and serine/threonine kinase		T	KOG0192	Tyrosine kinase specific for activated (GTP-bound) p21cdc42Hs
CGIg04972	451	S	0.161331	0.001612	O61577 KTNA1_STRPU Katanin p60 ATPase-containing subunit A1 OS=Strongylocentrotus purpuratus OX=7668 GN=KATNA1 PE=1 SV=1	KATNA1	_RIS[Phospho (STY)]GLNAEQIR_	1	Up	0.243531	0.196894	0.433928	1.9369	1.92977	1.55293	0.115643	0.255632	0.631354	2.1641	1.41544	1.66715	cytoplasm	K07767	KATNA1; katanin p60 ATPase-containing subunit A1 [EC:5.6.1.1]		GO:0000003 reproduction; GO:0000070 mitotic sister chromatid segregation; GO:0000212 meiotic spindle organization; GO:0000226 microtubule cytoskeleton organization; GO:0000278 mitotic cell cycle; GO:0000280 nuclear division; GO:0000819 sister chromatid segregation; GO:0000902 cell morphogenesis; GO:0001578 microtubule bundle formation; GO:0001764 neuron migration; GO:0006996 organelle organizatio…	GO:0000151 ubiquitin ligase complex; GO:0000922 spindle pole; GO:0005622 intracellular anatomical structure; GO:0005634 nucleus; GO:0005694 chromosome; GO:0005737 cytoplasm; GO:0005811 lipid droplet; GO:0005813 centrosome; GO:0005815 microtubule organizing center; GO:0005819 spindle; GO:0005856 cytoskeleton; GO:0005874 microtubule; GO:0005875 microtubule associated complex; GO:0005881 cytoplasmic…	GO:0000166 nucleotide binding; GO:0003824 catalytic activity; GO:0005488 binding; GO:0005515 protein binding; GO:0005524 ATP binding; GO:0008017 microtubule binding; GO:0008092 cytoskeletal protein binding; GO:0008568 microtubule severing ATPase activity; GO:0015631 tubulin binding; GO:0016462 pyrophosphatase activity; GO:0016787 hydrolase activity; GO:0016817 hydrolase activity, acting on acid a…	PF00004; PF17862; PF09336	PF00004 ATPase family associated with various cellular activities (AAA); PF17862 AAA+ lid domain; PF09336 Vps4 C terminal oligomerisation domain	PF17862 AAA+ lid domain	O	KOG0738	AAA+-type ATPase
CGIg04973	917	S	0.63608	0.00503813	XP_011438940.2 MAP7 domain-containing protein 1 isoform X8 [Crassostrea gigas]	--	_SSS[Phospho (STY)]QGELTLEK_	1	Up	1.21205	1.04651	0.990206	1.55907	1.87762	1.67079	1.30035	1.25675	1.35983	0.674011	1.08936	0.884468	nucleus	K16806	MAP7D1; MAP7 domain-containing protein 1
CGIg04973	586	T	0.566951	0.00347981	XP_011438940.2 MAP7 domain-containing protein 1 isoform X8 [Crassostrea gigas]	--	_TPPTAPGT[Phospho (STY)]PEK_	1	Up	0.899592	0.687151	0.8954	1.40498	1.53557	1.43751	1.20012	1.00844	1.10855	1.18425	1.67234	1.1714	nucleus	K16806	MAP7D1; MAP7 domain-containing protein 1
CGIg04973	601	T	0.5336	0.0295775	XP_011438940.2 MAP7 domain-containing protein 1 isoform X8 [Crassostrea gigas]	--	_ALSPKPGT[Phospho (STY)]PEPVTAR_	1	Up	0.586508	0.664558	1.09328	1.60423	1.48854	1.30068	2.13975	1.80805	1.82504	0.547539	0.801405	0.499998	nucleus	K16806	MAP7D1; MAP7 domain-containing protein 1
CGIg04973	579	T	0.49846	0.000230863	XP_011438940.2 MAP7 domain-containing protein 1 isoform X8 [Crassostrea gigas]	--	_T[Phospho (STY)]PPTAPGTPEK_	1	Up	0.700876	0.726541	0.698062	1.32151	1.57501	1.36756	0.98584	0.825607	0.969735	1.08998	1.3656	1.06449	nucleus	K16806	MAP7D1; MAP7 domain-containing protein 1
CGIg04973	105	S	0.350296	0.0429571	XP_011438940.2 MAP7 domain-containing protein 1 isoform X8 [Crassostrea gigas]	--	_AS[Phospho (STY)]PRPHTGDDHSESSGK_	0.999981	Up	0.480224	0.318943		1.63635	0.862773	0.922979					0.199459	0.313228	nucleus	K16806	MAP7D1; MAP7 domain-containing protein 1
CGIg04973	768	S	0.230019	0.00295787	XP_011438940.2 MAP7 domain-containing protein 1 isoform X8 [Crassostrea gigas]	--	_S[Phospho (STY)]DSPMSASTENLR_	1	Up	0.300482	0.587288	0.303468	1.70512	1.50748	1.96627	0.783396	0.888843	0.956019	2.00397	2.74357	1.98301	nucleus	K16806	MAP7D1; MAP7 domain-containing protein 1
CGIg04973	489	T	0.196706	0.00534208	XP_011438940.2 MAP7 domain-containing protein 1 isoform X8 [Crassostrea gigas]	--	_KVVATT[Phospho (STY)]PEK_	0.998833	Up	0.530378	0.543009	0.320848	2.20961	2.51567		0.678265	0.731993	0.508387	1.10379		1.05476	nucleus	K16806	MAP7D1; MAP7 domain-containing protein 1
CGIg05011	636	T	0.560242	0.000332779	XP_011443547.2 uncharacterized protein LOC105339627 isoform X4 [Crassostrea gigas]	--	_SMT[Phospho (STY)]PDNHIR_	1	Up	0.74434	0.656968	0.628269	1.2013	1.21586	1.20551	0.700497	0.628347	0.629487	1.11132	1.20256	1.16386	nucleus							PF01302	PF01302 CAP-Gly domain		Z	KOG0241	Kinesin-like protein
CGIg05011	462	S	0.559962	0.0284055	XP_011443547.2 uncharacterized protein LOC105339627 isoform X4 [Crassostrea gigas]	--	_S[Phospho (STY)]PLGSPYHSGQGSLR_	1	Up	0.578189	0.779937	0.510398	1.03004	1.38016	0.926675	0.937816	0.767899	0.936289	0.814696	1.19507	0.977043	nucleus							PF01302	PF01302 CAP-Gly domain		Z	KOG0241	Kinesin-like protein
CGIg05011	352	S	0.544156	0.00471492	XP_011443547.2 uncharacterized protein LOC105339627 isoform X4 [Crassostrea gigas]	--	_KQIS[Phospho (STY)]NES[Phospho (STY)]KELDTHNPGGR_	1	Up	0.502062	0.502358	0.423055		0.83735	0.911506	0.47503		0.420338	0.885298	0.998042	0.942442	nucleus							PF01302	PF01302 CAP-Gly domain		Z	KOG0241	Kinesin-like protein
CGIg05011	355	S	0.544156	0.00471492	XP_011443547.2 uncharacterized protein LOC105339627 isoform X4 [Crassostrea gigas]	--	_KQIS[Phospho (STY)]NES[Phospho (STY)]KELDTHNPGGR_	1	Up	0.502062	0.502358	0.423055		0.83735	0.911506	0.47503		0.420338	0.885298	0.998042	0.942442	nucleus							PF01302	PF01302 CAP-Gly domain		Z	KOG0241	Kinesin-like protein
CGIg05011	1240	T	0.480896	0.000301519	XP_011443547.2 uncharacterized protein LOC105339627 isoform X4 [Crassostrea gigas]	--	_SRT[Phospho (STY)]PDLGLSR_	1	Up	0.559056	0.587487	0.524115	1.11295	1.28133	1.07977	0.610194	0.578027	0.605404	1.08568	1.25949	1.15067	nucleus							PF01302	PF01302 CAP-Gly domain		Z	KOG0241	Kinesin-like protein
CGIg05011	499	S	0.418226	0.00634972	XP_011443547.2 uncharacterized protein LOC105339627 isoform X4 [Crassostrea gigas]	--	_SIEGSLQGS[Phospho (STY)]NR_	1	Up	0.529232	0.34598	0.537614	0.95621	1.12831	1.29362		0.636932	0.662022	1.24513	1.25992	0.621684	nucleus							PF01302	PF01302 CAP-Gly domain		Z	KOG0241	Kinesin-like protein
CGIg05011	491	S	0.272154	0.000378917	XP_011443547.2 uncharacterized protein LOC105339627 isoform X4 [Crassostrea gigas]	--	_S[Phospho (STY)]IEGSLQGSNR_	1	Up	0.40004	0.495894	0.342042	1.3836	1.64036	1.52485	0.531698	0.270732	0.457991	1.44564	1.65554	1.436	nucleus							PF01302	PF01302 CAP-Gly domain		Z	KOG0241	Kinesin-like protein
CGIg05012	688	S	0.641137	0.000695008	Q96D71 REPS1_HUMAN RalBP1-associated Eps domain-containing protein 1 OS=Homo sapiens OX=9606 GN=REPS1 PE=1 SV=3	REPS1	_RFES[Phospho (STY)]IPS[Phospho (STY)]EESLNK_	1	Up	0.843778	0.967055	0.893837	1.37729	1.47838	1.36288	0.632343	0.653581	0.0587804	1.46688	1.15513	1.6566	nucleus	K20068	REPS; RalBP1-associated Eps domain-containing protein		GO:0009987 cellular process; GO:0016043 cellular component organization; GO:0061024 membrane organization; GO:0071840 cellular component organization or biogenesis;	GO:0005622 intracellular anatomical structure; GO:0005737 cytoplasm; GO:0005829 cytosol; GO:0005886 plasma membrane; GO:0005905 clathrin-coated pit; GO:0012505 endomembrane system; GO:0016020 membrane; GO:0071944 cell periphery;	GO:0005488 binding; GO:0005515 protein binding; GO:0017124 SH3 domain binding; GO:0019904 protein domain specific binding;				U	KOG1955	Ral-GTPase effector RALBP1
CGIg05012	185	S	0.612256	0.000474704	Q96D71 REPS1_HUMAN RalBP1-associated Eps domain-containing protein 1 OS=Homo sapiens OX=9606 GN=REPS1 PE=1 SV=3	REPS1	_EES[Phospho (STY)]PNNATSPR_	1	Up	0.833988	0.924516	0.804349	1.36029	1.36889	1.45674	1.11217	1.06691	1.08165	1.22501	1.27133	1.24074	nucleus	K20068	REPS; RalBP1-associated Eps domain-containing protein		GO:0009987 cellular process; GO:0016043 cellular component organization; GO:0061024 membrane organization; GO:0071840 cellular component organization or biogenesis;	GO:0005622 intracellular anatomical structure; GO:0005737 cytoplasm; GO:0005829 cytosol; GO:0005886 plasma membrane; GO:0005905 clathrin-coated pit; GO:0012505 endomembrane system; GO:0016020 membrane; GO:0071944 cell periphery;	GO:0005488 binding; GO:0005515 protein binding; GO:0017124 SH3 domain binding; GO:0019904 protein domain specific binding;				U	KOG1955	Ral-GTPase effector RALBP1
CGIg05012	455	T	0.529212	0.0148778	Q96D71 REPS1_HUMAN RalBP1-associated Eps domain-containing protein 1 OS=Homo sapiens OX=9606 GN=REPS1 PE=1 SV=3	REPS1	_RAT[Phospho (STY)]PPDTPPSHPK_	1	Up	0.799391	0.747614	0.537356	1.15812	1.20394	1.57655	0.775071	0.625187	1.00351	1.28022	1.05885	0.863521	nucleus	K20068	REPS; RalBP1-associated Eps domain-containing protein		GO:0009987 cellular process; GO:0016043 cellular component organization; GO:0061024 membrane organization; GO:0071840 cellular component organization or biogenesis;	GO:0005622 intracellular anatomical structure; GO:0005737 cytoplasm; GO:0005829 cytosol; GO:0005886 plasma membrane; GO:0005905 clathrin-coated pit; GO:0012505 endomembrane system; GO:0016020 membrane; GO:0071944 cell periphery;	GO:0005488 binding; GO:0005515 protein binding; GO:0017124 SH3 domain binding; GO:0019904 protein domain specific binding;				U	KOG1955	Ral-GTPase effector RALBP1
CGIg05012	793	S	0.485697	0.0326715	Q96D71 REPS1_HUMAN RalBP1-associated Eps domain-containing protein 1 OS=Homo sapiens OX=9606 GN=REPS1 PE=1 SV=3	REPS1	_ERNS[Phospho (STY)]MLER_	1	Up	0.713051	0.597627	0.489902	1.70335	0.898219	1.10563	0.797998	0.611379	0.680551	0.66883	0.722234	0.741045	nucleus	K20068	REPS; RalBP1-associated Eps domain-containing protein		GO:0009987 cellular process; GO:0016043 cellular component organization; GO:0061024 membrane organization; GO:0071840 cellular component organization or biogenesis;	GO:0005622 intracellular anatomical structure; GO:0005737 cytoplasm; GO:0005829 cytosol; GO:0005886 plasma membrane; GO:0005905 clathrin-coated pit; GO:0012505 endomembrane system; GO:0016020 membrane; GO:0071944 cell periphery;	GO:0005488 binding; GO:0005515 protein binding; GO:0017124 SH3 domain binding; GO:0019904 protein domain specific binding;				U	KOG1955	Ral-GTPase effector RALBP1
CGIg05012	691	S	0.46458	0.00120183	Q96D71 REPS1_HUMAN RalBP1-associated Eps domain-containing protein 1 OS=Homo sapiens OX=9606 GN=REPS1 PE=1 SV=3	REPS1	_FESIPS[Phospho (STY)]EESLNK_	1	Up	0.764746	0.732191	0.643545	1.34682	1.5029	1.75763	0.998256	0.933161	1.03904	1.78493	1.63636	1.60119	nucleus	K20068	REPS; RalBP1-associated Eps domain-containing protein		GO:0009987 cellular process; GO:0016043 cellular component organization; GO:0061024 membrane organization; GO:0071840 cellular component organization or biogenesis;	GO:0005622 intracellular anatomical structure; GO:0005737 cytoplasm; GO:0005829 cytosol; GO:0005886 plasma membrane; GO:0005905 clathrin-coated pit; GO:0012505 endomembrane system; GO:0016020 membrane; GO:0071944 cell periphery;	GO:0005488 binding; GO:0005515 protein binding; GO:0017124 SH3 domain binding; GO:0019904 protein domain specific binding;				U	KOG1955	Ral-GTPase effector RALBP1
CGIg05012	649	T	0.429976	0.000103257	Q96D71 REPS1_HUMAN RalBP1-associated Eps domain-containing protein 1 OS=Homo sapiens OX=9606 GN=REPS1 PE=1 SV=3	REPS1	_GLST[Phospho (STY)]PPAVPPR_	1	Up	0.555497	0.641428	0.599013	1.31119	1.38247	1.48318	0.775608	0.839059	0.939719	1.38798	1.32685	1.31904	nucleus	K20068	REPS; RalBP1-associated Eps domain-containing protein		GO:0009987 cellular process; GO:0016043 cellular component organization; GO:0061024 membrane organization; GO:0071840 cellular component organization or biogenesis;	GO:0005622 intracellular anatomical structure; GO:0005737 cytoplasm; GO:0005829 cytosol; GO:0005886 plasma membrane; GO:0005905 clathrin-coated pit; GO:0012505 endomembrane system; GO:0016020 membrane; GO:0071944 cell periphery;	GO:0005488 binding; GO:0005515 protein binding; GO:0017124 SH3 domain binding; GO:0019904 protein domain specific binding;				U	KOG1955	Ral-GTPase effector RALBP1
CGIg05012	191	S	0.429059	0.0121302	Q96D71 REPS1_HUMAN RalBP1-associated Eps domain-containing protein 1 OS=Homo sapiens OX=9606 GN=REPS1 PE=1 SV=3	REPS1	_EESPNNATS[Phospho (STY)]PR_	0.999995	Up	0.718067	0.374522	0.628832	1.2361	1.41075	1.36524	0.973871	0.842057	0.899547	1.18439	1.00046	1.02254	nucleus	K20068	REPS; RalBP1-associated Eps domain-containing protein		GO:0009987 cellular process; GO:0016043 cellular component organization; GO:0061024 membrane organization; GO:0071840 cellular component organization or biogenesis;	GO:0005622 intracellular anatomical structure; GO:0005737 cytoplasm; GO:0005829 cytosol; GO:0005886 plasma membrane; GO:0005905 clathrin-coated pit; GO:0012505 endomembrane system; GO:0016020 membrane; GO:0071944 cell periphery;	GO:0005488 binding; GO:0005515 protein binding; GO:0017124 SH3 domain binding; GO:0019904 protein domain specific binding;				U	KOG1955	Ral-GTPase effector RALBP1
CGIg05012	694	S	0.155531	1.79745e-05	Q96D71 REPS1_HUMAN RalBP1-associated Eps domain-containing protein 1 OS=Homo sapiens OX=9606 GN=REPS1 PE=1 SV=3	REPS1	_FESIPS[Phospho (STY)]EES[Phospho (STY)]LNK_	1	Up	0.344529	0.321314	0.351127	2.29164	1.87768	2.36936	0.560129	0.512689	0.546252	1.59611	2.3632	2.52432	nucleus	K20068	REPS; RalBP1-associated Eps domain-containing protein		GO:0009987 cellular process; GO:0016043 cellular component organization; GO:0061024 membrane organization; GO:0071840 cellular component organization or biogenesis;	GO:0005622 intracellular anatomical structure; GO:0005737 cytoplasm; GO:0005829 cytosol; GO:0005886 plasma membrane; GO:0005905 clathrin-coated pit; GO:0012505 endomembrane system; GO:0016020 membrane; GO:0071944 cell periphery;	GO:0005488 binding; GO:0005515 protein binding; GO:0017124 SH3 domain binding; GO:0019904 protein domain specific binding;				U	KOG1955	Ral-GTPase effector RALBP1
CGIg05014	31	S	0.475698	9.95552e-05	XP_011443542.2 uncharacterized protein LOC105339624 [Crassostrea gigas]	--	_SQNRS[Phospho (STY)]PAQATADTEK_	1	Up	0.837308	0.954331	0.876457	1.97517	1.83602	1.79762	1.83446	1.68966	1.6834	0.268681	0.236933	0.364717	mitochondria
CGIg05027	542	T	0.651943	0.0105548	Q9D5W4 CCD81_MOUSE Coiled-coil domain-containing protein 81 OS=Mus musculus OX=10090 GN=Ccdc81 PE=2 SV=1	Ccdc81	_RPLT[Phospho (STY)]PPR_	1	Up	0.904992	0.898496	0.701922	1.39713	1.24864	1.19722	0.792659	0.888094	0.85621	1.17321	1.08453	0.840667	nucleus					GO:0005622 intracellular anatomical structure; GO:0005813 centrosome; GO:0005815 microtubule organizing center; GO:0005856 cytoskeleton; GO:0015630 microtubule cytoskeleton; GO:0043226 organelle; GO:0043228 non-membrane-bounded organelle; GO:0043229 intracellular organelle; GO:0043232 intracellular non-membrane-bounded organelle;		PF14908; PF18289	PF14908 CCDC81 eukaryotic HU domain 1; PF18289 CCDC81 eukaryotic HU domain 2
CGIg05027	410	S	0.522543	0.00716341	Q9D5W4 CCD81_MOUSE Coiled-coil domain-containing protein 81 OS=Mus musculus OX=10090 GN=Ccdc81 PE=2 SV=1	Ccdc81	_SVS[Phospho (STY)]PKLT[Phospho (STY)]PLQR_	1	Up	0.588055	0.815355	0.536575	1.25322	1.29873	1.16063	0.387899	0.538183	0.516944	1.37379	1.38424	1.18548	nucleus					GO:0005622 intracellular anatomical structure; GO:0005813 centrosome; GO:0005815 microtubule organizing center; GO:0005856 cytoskeleton; GO:0015630 microtubule cytoskeleton; GO:0043226 organelle; GO:0043228 non-membrane-bounded organelle; GO:0043229 intracellular organelle; GO:0043232 intracellular non-membrane-bounded organelle;		PF14908; PF18289	PF14908 CCDC81 eukaryotic HU domain 1; PF18289 CCDC81 eukaryotic HU domain 2
CGIg05027	414	T	0.522543	0.00716341	Q9D5W4 CCD81_MOUSE Coiled-coil domain-containing protein 81 OS=Mus musculus OX=10090 GN=Ccdc81 PE=2 SV=1	Ccdc81	_SVS[Phospho (STY)]PKLT[Phospho (STY)]PLQR_	1	Up	0.588055	0.815355	0.536575	1.25322	1.29873	1.16063	0.387899	0.538183	0.516944	1.37379	1.38424	1.18548	nucleus					GO:0005622 intracellular anatomical structure; GO:0005813 centrosome; GO:0005815 microtubule organizing center; GO:0005856 cytoskeleton; GO:0015630 microtubule cytoskeleton; GO:0043226 organelle; GO:0043228 non-membrane-bounded organelle; GO:0043229 intracellular organelle; GO:0043232 intracellular non-membrane-bounded organelle;		PF14908; PF18289	PF14908 CCDC81 eukaryotic HU domain 1; PF18289 CCDC81 eukaryotic HU domain 2
CGIg05047	310	S	0.453471	0.0104806	Q86VQ0 LCA5_HUMAN Lebercilin OS=Homo sapiens OX=9606 GN=LCA5 PE=1 SV=2	LCA5	_APS[Phospho (STY)]LQELTPR_	1	Up	0.659165	0.752605	0.796435	2.17347	1.36325	1.33284	0.802848	0.817253	0.669293	1.2363	1.16393	1.21247	nucleus	K24828	LCA5; lebercilin		GO:0001894 tissue homeostasis; GO:0001895 retina homeostasis; GO:0006810 transport; GO:0006996 organelle organization; GO:0007017 microtubule-based process; GO:0007018 microtubule-based movement; GO:0009987 cellular process; GO:0010970 transport along microtubule; GO:0016043 cellular component organization; GO:0030030 cell projection organization; GO:0030705 cytoskeleton-dependent intracellular t…	GO:0005622 intracellular anatomical structure; GO:0005737 cytoplasm; GO:0005815 microtubule organizing center; GO:0005856 cytoskeleton; GO:0005929 cilium; GO:0005930 axoneme; GO:0015630 microtubule cytoskeleton; GO:0032838 plasma membrane bounded cell projection cytoplasm; GO:0036064 ciliary basal body; GO:0042995 cell projection; GO:0043226 organelle; GO:0043228 non-membrane-bounded organelle; G…	GO:0005488 binding; GO:0044877 protein-containing complex binding;
CGIg05047	645	T	0.438182	0.0427968	Q86VQ0 LCA5_HUMAN Lebercilin OS=Homo sapiens OX=9606 GN=LCA5 PE=1 SV=2	LCA5	_NSYTFT[Phospho (STY)]KPIENMHSGK_	0.997224	Up	0.56618	0.747481	0.387529	1.39753		1.19073		1.53996					nucleus	K24828	LCA5; lebercilin		GO:0001894 tissue homeostasis; GO:0001895 retina homeostasis; GO:0006810 transport; GO:0006996 organelle organization; GO:0007017 microtubule-based process; GO:0007018 microtubule-based movement; GO:0009987 cellular process; GO:0010970 transport along microtubule; GO:0016043 cellular component organization; GO:0030030 cell projection organization; GO:0030705 cytoskeleton-dependent intracellular t…	GO:0005622 intracellular anatomical structure; GO:0005737 cytoplasm; GO:0005815 microtubule organizing center; GO:0005856 cytoskeleton; GO:0005929 cilium; GO:0005930 axoneme; GO:0015630 microtubule cytoskeleton; GO:0032838 plasma membrane bounded cell projection cytoplasm; GO:0036064 ciliary basal body; GO:0042995 cell projection; GO:0043226 organelle; GO:0043228 non-membrane-bounded organelle; G…	GO:0005488 binding; GO:0044877 protein-containing complex binding;
CGIg05047	629	S	0.340687	0.00132754	Q86VQ0 LCA5_HUMAN Lebercilin OS=Homo sapiens OX=9606 GN=LCA5 PE=1 SV=2	LCA5	_KDS[Phospho (STY)]DGGLGSASSK_	1	Up	0.710527	0.667883	0.569207	2.2819	1.90731	1.52753	0.438392	0.382998	0.495014	1.62104	1.7392	2.25254	nucleus	K24828	LCA5; lebercilin		GO:0001894 tissue homeostasis; GO:0001895 retina homeostasis; GO:0006810 transport; GO:0006996 organelle organization; GO:0007017 microtubule-based process; GO:0007018 microtubule-based movement; GO:0009987 cellular process; GO:0010970 transport along microtubule; GO:0016043 cellular component organization; GO:0030030 cell projection organization; GO:0030705 cytoskeleton-dependent intracellular t…	GO:0005622 intracellular anatomical structure; GO:0005737 cytoplasm; GO:0005815 microtubule organizing center; GO:0005856 cytoskeleton; GO:0005929 cilium; GO:0005930 axoneme; GO:0015630 microtubule cytoskeleton; GO:0032838 plasma membrane bounded cell projection cytoplasm; GO:0036064 ciliary basal body; GO:0042995 cell projection; GO:0043226 organelle; GO:0043228 non-membrane-bounded organelle; G…	GO:0005488 binding; GO:0044877 protein-containing complex binding;
CGIg05048	381	S	0.539931	0.0138784	Q9NFP5 SH3BG_DROME SH3 domain-binding glutamic acid-rich protein homolog OS=Drosophila melanogaster OX=7227 GN=Sh3beta PE=1 SV=2	Sh3beta	_EPS[Phospho (STY)]PVPETK_	1	Up	0.718421	0.62032	0.669817	0.927713	1.4348	1.35752	1.15945	1.12762	1.22851	1.09676	1.06036	0.733125	nucleus	K23740	SH3BGR; SH3 domain-binding glutamic acid-rich protein								S	KOG4023	Uncharacterized conserved protein
CGIg05048	371	S	0.376903	0.000296551	Q9NFP5 SH3BG_DROME SH3 domain-binding glutamic acid-rich protein homolog OS=Drosophila melanogaster OX=7227 GN=Sh3beta PE=1 SV=2	Sh3beta	_KAPS[Phospho (STY)]VEEEKPK_	1	Up	0.546057	0.490347	0.547958	1.2048	1.46632	1.53251	0.85546	0.89085	0.965708	0.424694	0.414919	0.380811	nucleus	K23740	SH3BGR; SH3 domain-binding glutamic acid-rich protein								S	KOG4023	Uncharacterized conserved protein
CGIg05058	1084	S	0.661384	0.0483471	Q5THR3 EFCB6_HUMAN EF-hand calcium-binding domain-containing protein 6 OS=Homo sapiens OX=9606 GN=EFCAB6 PE=1 SV=1	EFCAB6	_IEEC[Carbamidomethyl (C)]GALS[Phospho (STY)]PQEAETK_	1	Up	0.423419	0.390898		0.505779	0.657555	0.683514	0.449365		0.305529	0.6379			cytoplasm	K23851	EFCAB6; EF-hand calcium-binding domain-containing protein 6			GO:0005622 intracellular anatomical structure; GO:0005634 nucleus; GO:0005654 nucleoplasm; GO:0031974 membrane-enclosed lumen; GO:0031981 nuclear lumen; GO:0043226 organelle; GO:0043227 membrane-bounded organelle; GO:0043229 intracellular organelle; GO:0043231 intracellular membrane-bounded organelle; GO:0043233 organelle lumen; GO:0070013 intracellular organelle lumen;	GO:0005488 binding; GO:0005509 calcium ion binding; GO:0043167 ion binding; GO:0043169 cation binding; GO:0046872 metal ion binding;	PF08976; PF13833	PF08976 EF-hand domain; PF13833 EF-hand domain pair		T	KOG0027	Calmodulin and related proteins (EF-Hand superfamily)
CGIg05058	1225	S	0.633947	0.00712196	Q5THR3 EFCB6_HUMAN EF-hand calcium-binding domain-containing protein 6 OS=Homo sapiens OX=9606 GN=EFCAB6 PE=1 SV=1	EFCAB6	_EVDYADIGVIS[Phospho (STY)]K_	1	Up	0.745492	0.791974	0.72608	1.01561	1.36164	1.19331	1.29742	1.05646	0.982378	1.36615	1.23871	1.46855	cytoplasm	K23851	EFCAB6; EF-hand calcium-binding domain-containing protein 6			GO:0005622 intracellular anatomical structure; GO:0005634 nucleus; GO:0005654 nucleoplasm; GO:0031974 membrane-enclosed lumen; GO:0031981 nuclear lumen; GO:0043226 organelle; GO:0043227 membrane-bounded organelle; GO:0043229 intracellular organelle; GO:0043231 intracellular membrane-bounded organelle; GO:0043233 organelle lumen; GO:0070013 intracellular organelle lumen;	GO:0005488 binding; GO:0005509 calcium ion binding; GO:0043167 ion binding; GO:0043169 cation binding; GO:0046872 metal ion binding;	PF08976; PF13833	PF08976 EF-hand domain; PF13833 EF-hand domain pair	PF08976 EF-hand domain	T	KOG0027	Calmodulin and related proteins (EF-Hand superfamily)
CGIg05058	1328	T	0.3843	2.73997e-05	Q5THR3 EFCB6_HUMAN EF-hand calcium-binding domain-containing protein 6 OS=Homo sapiens OX=9606 GN=EFCAB6 PE=1 SV=1	EFCAB6	_MST[Phospho (STY)]PLINAESAEAR_	1	Up	0.510808	0.490415	0.556465	1.34454	1.29789	1.41089	0.520135	0.560419	0.566903	1.22245	1.45728	1.3843	cytoplasm	K23851	EFCAB6; EF-hand calcium-binding domain-containing protein 6			GO:0005622 intracellular anatomical structure; GO:0005634 nucleus; GO:0005654 nucleoplasm; GO:0031974 membrane-enclosed lumen; GO:0031981 nuclear lumen; GO:0043226 organelle; GO:0043227 membrane-bounded organelle; GO:0043229 intracellular organelle; GO:0043231 intracellular membrane-bounded organelle; GO:0043233 organelle lumen; GO:0070013 intracellular organelle lumen;	GO:0005488 binding; GO:0005509 calcium ion binding; GO:0043167 ion binding; GO:0043169 cation binding; GO:0046872 metal ion binding;	PF08976; PF13833	PF08976 EF-hand domain; PF13833 EF-hand domain pair		T	KOG0027	Calmodulin and related proteins (EF-Hand superfamily)
CGIg05082	370	S	0.581322	0.0128962	P43679 ACHB3_CHICK Neuronal acetylcholine receptor subunit beta-3 OS=Gallus gallus OX=9031 GN=CHRNB3 PE=2 SV=2	CHRNB3	_S[Phospho (STY)]LDIPAVEPIVK_	1	Up	0.612647	0.396786	0.539393	0.857288	0.92041	0.886618	0.306762	0.511529	0.454866	1.03506	1.10441	0.822336	plasma membrane	K04814	CHRNB3; nicotinic acetylcholine receptor beta-3	map04080 Neuroactive ligand-receptor interaction							T	KOG3645	Acetylcholine receptor
CGIg05085	1538	S	0.192928	0.0292476	Q8N7X0 ADGB_HUMAN Androglobin OS=Homo sapiens OX=9606 GN=ADGB PE=2 SV=3	ADGB	_GS[Phospho (STY)]RPSS[Phospho (STY)]QQFDHSKPHWSLR_	1	Up	0.328402		0.268066	1.60611	1.47277	1.55862	0.187312	1.56528	1.82347	1.62854			nucleus				GO:0006508 proteolysis; GO:0006807 nitrogen compound metabolic process; GO:0008152 metabolic process; GO:0019538 protein metabolic process; GO:0043170 macromolecule metabolic process; GO:0044238 primary metabolic process; GO:0071704 organic substance metabolic process; GO:1901564 organonitrogen compound metabolic process;	GO:0005622 intracellular anatomical structure; GO:0005737 cytoplasm;	GO:0003824 catalytic activity; GO:0004175 endopeptidase activity; GO:0004197 cysteine-type endopeptidase activity; GO:0004198 calcium-dependent cysteine-type endopeptidase activity; GO:0008233 peptidase activity; GO:0008234 cysteine-type peptidase activity; GO:0016787 hydrolase activity; GO:0140096 catalytic activity, acting on a protein;				OT	KOG0045	Cytosolic Ca2+-dependent cysteine protease (calpain), large subunit (EF-Hand protein superfamily)
CGIg05086	250	S	0.0920443	5.01684e-05	O43390 HNRPR_HUMAN Heterogeneous nuclear ribonucleoprotein R OS=Homo sapiens OX=9606 GN=HNRNPR PE=1 SV=1	HNRNPR	_SKS[Phospho (STY)]KDEIMEEFSK_	1	Up	0.152906	0.171833	0.234874	2.02584	1.95455	2.09944	0.148088	0.162707	0.0568673	1.82626	1.97663	1.97616	nucleus	K13161	HNRNPR; heterogeneous nuclear ribonucleoprotein R		GO:0000003 reproduction; GO:0000375 RNA splicing, via transesterification reactions; GO:0000377 RNA splicing, via transesterification reactions with bulged adenosine as nucleophile; GO:0000398 mRNA splicing, via spliceosome; GO:0002064 epithelial cell development; GO:0002065 columnar/cuboidal epithelial cell differentiation; GO:0002066 columnar/cuboidal epithelial cell development; GO:0002376 imm…	GO:0005622 intracellular anatomical structure; GO:0005634 nucleus; GO:0005654 nucleoplasm; GO:0005681 spliceosomal complex; GO:0005737 cytoplasm; GO:0016020 membrane; GO:0030425 dendrite; GO:0031594 neuromuscular junction; GO:0031974 membrane-enclosed lumen; GO:0031981 nuclear lumen; GO:0032991 protein-containing complex; GO:0035770 ribonucleoprotein granule; GO:0036477 somatodendritic compartmen…	GO:0003676 nucleic acid binding; GO:0003723 RNA binding; GO:0003727 single-stranded RNA binding; GO:0003729 mRNA binding; GO:0003730 mRNA 3'-UTR binding; GO:0005488 binding; GO:0008143 poly(A) binding; GO:0048027 mRNA 5'-UTR binding; GO:0070717 poly-purine tract binding; GO:0097159 organic cyclic compound binding; GO:1901363 heterocyclic compound binding;	PF18360; PF00076	PF18360 Heterogeneous nuclear ribonucleoprotein Q acidic domain; PF00076 RNA recognition motif. (a.k.a. RRM, RBD, or RNP domain)	PF00076 RNA recognition motif. (a.k.a. RRM, RBD, or RNP domain)	A	KOG0117	Heterogeneous nuclear ribonucleoprotein R (RRM superfamily)
CGIg05093	9	S	0.503784	0.0451527	Q8VIJ6 SFPQ_MOUSE Splicing factor, proline- and glutamine-rich OS=Mus musculus OX=10090 GN=Sfpq PE=1 SV=1	Sfpq	_[Acetyl (Protein N-term)]STT[Phospho (STY)]PSKPS[Phospho (STY)]PMDLK_	1	Up		0.492084	0.627704	0.909165	0.988952	1.43602	0.399364		0.788456	1.26391	1.29587	1.2984	cytoplasm	K13219	SFPQ, PSF; splicing factor, proline- and glutamine-rich		GO:0000003 reproduction; GO:0000122 negative regulation of transcription by RNA polymerase II; GO:0000375 RNA splicing, via transesterification reactions; GO:0000377 RNA splicing, via transesterification reactions with bulged adenosine as nucleophile; GO:0000380 alternative mRNA splicing, via spliceosome; GO:0000398 mRNA splicing, via spliceosome; GO:0000724 double-strand break repair via homolog…	GO:0000785 chromatin; GO:0001650 fibrillar center; GO:0005622 intracellular anatomical structure; GO:0005634 nucleus; GO:0005654 nucleoplasm; GO:0005667 transcription regulator complex; GO:0005681 spliceosomal complex; GO:0005694 chromosome; GO:0005730 nucleolus; GO:0016363 nuclear matrix; GO:0016604 nuclear body; GO:0016607 nuclear speck; GO:0031974 membrane-enclosed lumen; GO:0031981 nuclear lu…	GO:0000976 transcription cis-regulatory region binding; GO:0000977 RNA polymerase II transcription regulatory region sequence-specific DNA binding; GO:0000978 RNA polymerase II cis-regulatory region sequence-specific DNA binding; GO:0000981 DNA-binding transcription factor activity, RNA polymerase II-specific; GO:0000987 cis-regulatory region sequence-specific DNA binding; GO:0001067 transcriptio…	PF00076; PF08075	PF00076 RNA recognition motif. (a.k.a. RRM, RBD, or RNP domain); PF08075 NOPS (NUC059) domain		A	KOG0115	RNA-binding protein p54nrb (RRM superfamily)
CGIg05093	474	S	0.411072	0.00734673	Q8VIJ6 SFPQ_MOUSE Splicing factor, proline- and glutamine-rich OS=Mus musculus OX=10090 GN=Sfpq PE=1 SV=1	Sfpq	_GGGGGAPLPPPPAPPAGMGFDS[Phospho (STY)]PSDQMPSSSVGK_	1	Up	0.451319	0.273559	0.452543	0.827409	1.02376	1.01311	0.511488	0.51372	0.606051	1.30864	1.25427	1.16998	cytoplasm	K13219	SFPQ, PSF; splicing factor, proline- and glutamine-rich		GO:0000003 reproduction; GO:0000122 negative regulation of transcription by RNA polymerase II; GO:0000375 RNA splicing, via transesterification reactions; GO:0000377 RNA splicing, via transesterification reactions with bulged adenosine as nucleophile; GO:0000380 alternative mRNA splicing, via spliceosome; GO:0000398 mRNA splicing, via spliceosome; GO:0000724 double-strand break repair via homolog…	GO:0000785 chromatin; GO:0001650 fibrillar center; GO:0005622 intracellular anatomical structure; GO:0005634 nucleus; GO:0005654 nucleoplasm; GO:0005667 transcription regulator complex; GO:0005681 spliceosomal complex; GO:0005694 chromosome; GO:0005730 nucleolus; GO:0016363 nuclear matrix; GO:0016604 nuclear body; GO:0016607 nuclear speck; GO:0031974 membrane-enclosed lumen; GO:0031981 nuclear lu…	GO:0000976 transcription cis-regulatory region binding; GO:0000977 RNA polymerase II transcription regulatory region sequence-specific DNA binding; GO:0000978 RNA polymerase II cis-regulatory region sequence-specific DNA binding; GO:0000981 DNA-binding transcription factor activity, RNA polymerase II-specific; GO:0000987 cis-regulatory region sequence-specific DNA binding; GO:0001067 transcriptio…	PF00076; PF08075	PF00076 RNA recognition motif. (a.k.a. RRM, RBD, or RNP domain); PF08075 NOPS (NUC059) domain		A	KOG0115	RNA-binding protein p54nrb (RRM superfamily)
CGIg05093	4	T	0.247736	0.000876505	Q8VIJ6 SFPQ_MOUSE Splicing factor, proline- and glutamine-rich OS=Mus musculus OX=10090 GN=Sfpq PE=1 SV=1	Sfpq	_[Acetyl (Protein N-term)]STT[Phospho (STY)]PSKPSPMDLK_	1	Up	0.371173	0.360591	0.437962	1.64055	1.17628	1.90484	0.468267	0.60655	0.557319	1.71725	1.91237	2.0073	cytoplasm	K13219	SFPQ, PSF; splicing factor, proline- and glutamine-rich		GO:0000003 reproduction; GO:0000122 negative regulation of transcription by RNA polymerase II; GO:0000375 RNA splicing, via transesterification reactions; GO:0000377 RNA splicing, via transesterification reactions with bulged adenosine as nucleophile; GO:0000380 alternative mRNA splicing, via spliceosome; GO:0000398 mRNA splicing, via spliceosome; GO:0000724 double-strand break repair via homolog…	GO:0000785 chromatin; GO:0001650 fibrillar center; GO:0005622 intracellular anatomical structure; GO:0005634 nucleus; GO:0005654 nucleoplasm; GO:0005667 transcription regulator complex; GO:0005681 spliceosomal complex; GO:0005694 chromosome; GO:0005730 nucleolus; GO:0016363 nuclear matrix; GO:0016604 nuclear body; GO:0016607 nuclear speck; GO:0031974 membrane-enclosed lumen; GO:0031981 nuclear lu…	GO:0000976 transcription cis-regulatory region binding; GO:0000977 RNA polymerase II transcription regulatory region sequence-specific DNA binding; GO:0000978 RNA polymerase II cis-regulatory region sequence-specific DNA binding; GO:0000981 DNA-binding transcription factor activity, RNA polymerase II-specific; GO:0000987 cis-regulatory region sequence-specific DNA binding; GO:0001067 transcriptio…	PF00076; PF08075	PF00076 RNA recognition motif. (a.k.a. RRM, RBD, or RNP domain); PF08075 NOPS (NUC059) domain		A	KOG0115	RNA-binding protein p54nrb (RRM superfamily)
CGIg05144	2141	S	0.539351	0.00971733	P55196 AFAD_HUMAN Afadin OS=Homo sapiens OX=9606 GN=AFDN PE=1 SV=3	AFDN	_LIS[Phospho (STY)]EVSEIAQK_	1	Up	0.663962	0.738526	0.667647	1.16704	1.06367	1.60749	0.925392	0.808915	0.983627	0.823846	0.868702	0.802214	nucleus	K05702	AF6, MLLT4; afadin	map04014 Ras signaling pathway; map04015 Rap1 signaling pathway; map04024 cAMP signaling pathway; map04520 Adherens junction; map04530 Tight junction; map04670 Leukocyte transendothelial migration	GO:0000132 establishment of mitotic spindle orientation; GO:0000165 MAPK cascade; GO:0000226 microtubule cytoskeleton organization; GO:0000278 mitotic cell cycle; GO:0000902 cell morphogenesis; GO:0001654 eye development; GO:0001700 embryonic development via the syncytial blastoderm; GO:0001736 establishment of planar polarity; GO:0001738 morphogenesis of a polarized epithelium; GO:0001745 compou…	GO:0005622 intracellular anatomical structure; GO:0005634 nucleus; GO:0005654 nucleoplasm; GO:0005737 cytoplasm; GO:0005829 cytosol; GO:0005886 plasma membrane; GO:0005911 cell-cell junction; GO:0005912 adherens junction; GO:0005915 zonula adherens; GO:0005938 cell cortex; GO:0016020 membrane; GO:0016604 nuclear body; GO:0016607 nuclear speck; GO:0030054 cell junction; GO:0030055 cell-substrate j…	GO:0005488 binding; GO:0005515 protein binding; GO:0019899 enzyme binding; GO:0019904 protein domain specific binding; GO:0030274 LIM domain binding; GO:0031267 small GTPase binding; GO:0050839 cell adhesion molecule binding; GO:0051020 GTPase binding;	PF00788; PF00595	PF00788 Ras association (RalGDS/AF-6) domain; PF00595 PDZ domain		Z	KOG1892	Actin filament-binding protein Afadin
CGIg05144	1234	S	0.538401	0.0136883	P55196 AFAD_HUMAN Afadin OS=Homo sapiens OX=9606 GN=AFDN PE=1 SV=3	AFDN	_KKNS[Phospho (STY)]VVDLR_	1	Up	0.718719	0.988774	0.718325	1.2164	1.58474	1.70446	0.593124	0.765294	0.886736	1.5388	1.78571	0.978632	nucleus	K05702	AF6, MLLT4; afadin	map04014 Ras signaling pathway; map04015 Rap1 signaling pathway; map04024 cAMP signaling pathway; map04520 Adherens junction; map04530 Tight junction; map04670 Leukocyte transendothelial migration	GO:0000132 establishment of mitotic spindle orientation; GO:0000165 MAPK cascade; GO:0000226 microtubule cytoskeleton organization; GO:0000278 mitotic cell cycle; GO:0000902 cell morphogenesis; GO:0001654 eye development; GO:0001700 embryonic development via the syncytial blastoderm; GO:0001736 establishment of planar polarity; GO:0001738 morphogenesis of a polarized epithelium; GO:0001745 compou…	GO:0005622 intracellular anatomical structure; GO:0005634 nucleus; GO:0005654 nucleoplasm; GO:0005737 cytoplasm; GO:0005829 cytosol; GO:0005886 plasma membrane; GO:0005911 cell-cell junction; GO:0005912 adherens junction; GO:0005915 zonula adherens; GO:0005938 cell cortex; GO:0016020 membrane; GO:0016604 nuclear body; GO:0016607 nuclear speck; GO:0030054 cell junction; GO:0030055 cell-substrate j…	GO:0005488 binding; GO:0005515 protein binding; GO:0019899 enzyme binding; GO:0019904 protein domain specific binding; GO:0030274 LIM domain binding; GO:0031267 small GTPase binding; GO:0050839 cell adhesion molecule binding; GO:0051020 GTPase binding;	PF00788; PF00595	PF00788 Ras association (RalGDS/AF-6) domain; PF00595 PDZ domain		Z	KOG1892	Actin filament-binding protein Afadin
CGIg05144	1756	S	0.429784	0.00791306	P55196 AFAD_HUMAN Afadin OS=Homo sapiens OX=9606 GN=AFDN PE=1 SV=3	AFDN	_HSGSSGRDERPQS[Phospho (STY)]AYFAHHPQPDFGR_	1	Up	0.818694	0.48113	0.481038	1.41849	1.33319	1.39194	0.64942	0.652558	0.531115	1.58761	1.7325	1.73621	nucleus	K05702	AF6, MLLT4; afadin	map04014 Ras signaling pathway; map04015 Rap1 signaling pathway; map04024 cAMP signaling pathway; map04520 Adherens junction; map04530 Tight junction; map04670 Leukocyte transendothelial migration	GO:0000132 establishment of mitotic spindle orientation; GO:0000165 MAPK cascade; GO:0000226 microtubule cytoskeleton organization; GO:0000278 mitotic cell cycle; GO:0000902 cell morphogenesis; GO:0001654 eye development; GO:0001700 embryonic development via the syncytial blastoderm; GO:0001736 establishment of planar polarity; GO:0001738 morphogenesis of a polarized epithelium; GO:0001745 compou…	GO:0005622 intracellular anatomical structure; GO:0005634 nucleus; GO:0005654 nucleoplasm; GO:0005737 cytoplasm; GO:0005829 cytosol; GO:0005886 plasma membrane; GO:0005911 cell-cell junction; GO:0005912 adherens junction; GO:0005915 zonula adherens; GO:0005938 cell cortex; GO:0016020 membrane; GO:0016604 nuclear body; GO:0016607 nuclear speck; GO:0030054 cell junction; GO:0030055 cell-substrate j…	GO:0005488 binding; GO:0005515 protein binding; GO:0019899 enzyme binding; GO:0019904 protein domain specific binding; GO:0030274 LIM domain binding; GO:0031267 small GTPase binding; GO:0050839 cell adhesion molecule binding; GO:0051020 GTPase binding;	PF00788; PF00595	PF00788 Ras association (RalGDS/AF-6) domain; PF00595 PDZ domain		Z	KOG1892	Actin filament-binding protein Afadin
CGIg05144	2507	S	0.348836	0.0111879	P55196 AFAD_HUMAN Afadin OS=Homo sapiens OX=9606 GN=AFDN PE=1 SV=3	AFDN	_NTYS[Phospho (STY)]VGS[Phospho (STY)]ESDR_	0.999951	Up	0.546391		0.476255	1.62778	1.67581	1.0938			0.545048	1.78234	1.04804	1.03797	nucleus	K05702	AF6, MLLT4; afadin	map04014 Ras signaling pathway; map04015 Rap1 signaling pathway; map04024 cAMP signaling pathway; map04520 Adherens junction; map04530 Tight junction; map04670 Leukocyte transendothelial migration	GO:0000132 establishment of mitotic spindle orientation; GO:0000165 MAPK cascade; GO:0000226 microtubule cytoskeleton organization; GO:0000278 mitotic cell cycle; GO:0000902 cell morphogenesis; GO:0001654 eye development; GO:0001700 embryonic development via the syncytial blastoderm; GO:0001736 establishment of planar polarity; GO:0001738 morphogenesis of a polarized epithelium; GO:0001745 compou…	GO:0005622 intracellular anatomical structure; GO:0005634 nucleus; GO:0005654 nucleoplasm; GO:0005737 cytoplasm; GO:0005829 cytosol; GO:0005886 plasma membrane; GO:0005911 cell-cell junction; GO:0005912 adherens junction; GO:0005915 zonula adherens; GO:0005938 cell cortex; GO:0016020 membrane; GO:0016604 nuclear body; GO:0016607 nuclear speck; GO:0030054 cell junction; GO:0030055 cell-substrate j…	GO:0005488 binding; GO:0005515 protein binding; GO:0019899 enzyme binding; GO:0019904 protein domain specific binding; GO:0030274 LIM domain binding; GO:0031267 small GTPase binding; GO:0050839 cell adhesion molecule binding; GO:0051020 GTPase binding;	PF00788; PF00595	PF00788 Ras association (RalGDS/AF-6) domain; PF00595 PDZ domain		Z	KOG1892	Actin filament-binding protein Afadin
CGIg05144	2504	S	0.264721	0.000849653	P55196 AFAD_HUMAN Afadin OS=Homo sapiens OX=9606 GN=AFDN PE=1 SV=3	AFDN	_NTYS[Phospho (STY)]VGS[Phospho (STY)]ESDR_	1	Up	0.322064	0.384111		1.31763	1.21324	1.47056		0.336149		0.897334	0.675923	0.647229	nucleus	K05702	AF6, MLLT4; afadin	map04014 Ras signaling pathway; map04015 Rap1 signaling pathway; map04024 cAMP signaling pathway; map04520 Adherens junction; map04530 Tight junction; map04670 Leukocyte transendothelial migration	GO:0000132 establishment of mitotic spindle orientation; GO:0000165 MAPK cascade; GO:0000226 microtubule cytoskeleton organization; GO:0000278 mitotic cell cycle; GO:0000902 cell morphogenesis; GO:0001654 eye development; GO:0001700 embryonic development via the syncytial blastoderm; GO:0001736 establishment of planar polarity; GO:0001738 morphogenesis of a polarized epithelium; GO:0001745 compou…	GO:0005622 intracellular anatomical structure; GO:0005634 nucleus; GO:0005654 nucleoplasm; GO:0005737 cytoplasm; GO:0005829 cytosol; GO:0005886 plasma membrane; GO:0005911 cell-cell junction; GO:0005912 adherens junction; GO:0005915 zonula adherens; GO:0005938 cell cortex; GO:0016020 membrane; GO:0016604 nuclear body; GO:0016607 nuclear speck; GO:0030054 cell junction; GO:0030055 cell-substrate j…	GO:0005488 binding; GO:0005515 protein binding; GO:0019899 enzyme binding; GO:0019904 protein domain specific binding; GO:0030274 LIM domain binding; GO:0031267 small GTPase binding; GO:0050839 cell adhesion molecule binding; GO:0051020 GTPase binding;	PF00788; PF00595	PF00788 Ras association (RalGDS/AF-6) domain; PF00595 PDZ domain		Z	KOG1892	Actin filament-binding protein Afadin
CGIg05144	2492	S	0.252907	0.0024852	P55196 AFAD_HUMAN Afadin OS=Homo sapiens OX=9606 GN=AFDN PE=1 SV=3	AFDN	_SVS[Phospho (STY)]FNTQLETR_	0.999996	Up	0.522303		0.361842	1.66764	1.89273	1.68352	0.51731	0.520075	0.445995	1.61151	1.79863	1.47238	nucleus	K05702	AF6, MLLT4; afadin	map04014 Ras signaling pathway; map04015 Rap1 signaling pathway; map04024 cAMP signaling pathway; map04520 Adherens junction; map04530 Tight junction; map04670 Leukocyte transendothelial migration	GO:0000132 establishment of mitotic spindle orientation; GO:0000165 MAPK cascade; GO:0000226 microtubule cytoskeleton organization; GO:0000278 mitotic cell cycle; GO:0000902 cell morphogenesis; GO:0001654 eye development; GO:0001700 embryonic development via the syncytial blastoderm; GO:0001736 establishment of planar polarity; GO:0001738 morphogenesis of a polarized epithelium; GO:0001745 compou…	GO:0005622 intracellular anatomical structure; GO:0005634 nucleus; GO:0005654 nucleoplasm; GO:0005737 cytoplasm; GO:0005829 cytosol; GO:0005886 plasma membrane; GO:0005911 cell-cell junction; GO:0005912 adherens junction; GO:0005915 zonula adherens; GO:0005938 cell cortex; GO:0016020 membrane; GO:0016604 nuclear body; GO:0016607 nuclear speck; GO:0030054 cell junction; GO:0030055 cell-substrate j…	GO:0005488 binding; GO:0005515 protein binding; GO:0019899 enzyme binding; GO:0019904 protein domain specific binding; GO:0030274 LIM domain binding; GO:0031267 small GTPase binding; GO:0050839 cell adhesion molecule binding; GO:0051020 GTPase binding;	PF00788; PF00595	PF00788 Ras association (RalGDS/AF-6) domain; PF00595 PDZ domain		Z	KOG1892	Actin filament-binding protein Afadin
CGIg05149	1111	S	0.419417	0.000346402	C6KFA3 AGRG6_DANRE Adhesion G-protein coupled receptor G6 OS=Danio rerio OX=7955 GN=adgrg6 PE=1 SV=1	adgrg6	_STAS[Phospho (STY)]FSDIK_	1	Up	0.691663	0.678337	0.547303	1.46892	1.55184	1.55059	0.454595	0.40808	0.424442	2.0804	2.59867	1.89755	plasma membrane	K08463	ADGRG6, GPR126; adhesion G-protein coupled receptor G6		GO:0000003 reproduction; GO:0000902 cell morphogenesis; GO:0001503 ossification; GO:0003007 heart morphogenesis; GO:0003205 cardiac chamber development; GO:0003206 cardiac chamber morphogenesis; GO:0006996 organelle organization; GO:0007005 mitochondrion organization; GO:0007154 cell communication; GO:0007165 signal transduction; GO:0007166 cell surface receptor signaling pathway; GO:0007186 G pr…	GO:0005622 intracellular anatomical structure; GO:0005737 cytoplasm; GO:0005829 cytosol; GO:0005886 plasma membrane; GO:0009986 cell surface; GO:0016020 membrane; GO:0016324 apical plasma membrane; GO:0045177 apical part of cell; GO:0071944 cell periphery; GO:0098590 plasma membrane region;	GO:0004888 transmembrane signaling receptor activity; GO:0004930 G protein-coupled receptor activity; GO:0005488 binding; GO:0005515 protein binding; GO:0005518 collagen binding; GO:0038023 signaling receptor activity; GO:0043236 laminin binding; GO:0044877 protein-containing complex binding; GO:0050840 extracellular matrix binding; GO:0060089 molecular transducer activity;				T	KOG4193	G protein-coupled receptors
CGIg05161	56	S	0.250609	0.0305022	XP_019922514.2 uncharacterized protein LOC105327567 isoform X2 [Crassostrea gigas]	--	_DAVMEC[Carbamidomethyl (C)]AGVTS[Phospho (STY)]PVPAEGGQDPLFMEGQR_	1	Up	0.325943	0.278879		1.23763	1.17874	1.20375	0.183261	0.415392	0.51672	1.2321	0.833545		cytoplasm	K23694	GRAP; GRB2-related adapter protein					PF00017	PF00017 SH2 domain
CGIg05162	559	S	0.547193	0.0340141	Q75J93 CPAS1_DICDI Circularly permutated Ras protein 1 OS=Dictyostelium discoideum OX=44689 GN=cpras1 PE=3 SV=1	cpras1	_EENEQAEEAS[Phospho (STY)]GGER_	1	Up	0.8969	0.532742	0.682748	1.03143	1.26101	1.56796	0.634243	0.698828	0.768405	1.57992	1.22626	0.806304	nucleus							PF04810; PF04811	PF04810 Sec23/Sec24 zinc finger; PF04811 Sec23/Sec24 trunk domain
CGIg05212	220	S	0.610782	0.00347517	P97864 CASP7_MOUSE Caspase-7 OS=Mus musculus OX=10090 GN=Casp7 PE=1 SV=2	Casp7	_S[Phospho (STY)]DIEPTATGHGDGK_	0.999971	Up	1.07707	0.958721	0.925876	1.42699	1.78277	1.63921	0.892381	1.17697	0.894803		1.13227	1.08822	cytoplasm,nucleus	K04400	CASP10; caspase 10 [EC:3.4.22.63]	map04210 Apoptosis; map04622 RIG-I-like receptor signaling pathway; map04668 TNF signaling pathway				PF00656	PF00656 Caspase domain	PF00656 Caspase domain	D	KOG3573	Caspase, apoptotic cysteine protease
CGIg05214	167	S	0.179191	0.00155893	Q92851 CASPA_HUMAN Caspase-10 OS=Homo sapiens OX=9606 GN=CASP10 PE=1 SV=3	CASP10	_GIGFDS[Phospho (STY)]GVHLPSR_	1	Up	0.29841		0.285311	1.35403	2.01451	1.51777	0.324982		0.260004	3.07197	3.18989	3.62418	cytoplasm	K02186	CASP2; caspase 2 [EC:3.4.22.55]	map04210 Apoptosis	GO:0006508 proteolysis; GO:0006807 nitrogen compound metabolic process; GO:0006915 apoptotic process; GO:0007154 cell communication; GO:0007165 signal transduction; GO:0007166 cell surface receptor signaling pathway; GO:0008152 metabolic process; GO:0008219 cell death; GO:0009966 regulation of signal transduction; GO:0009967 positive regulation of signal transduction; GO:0009987 cellular process;…	GO:0005622 intracellular anatomical structure; GO:0005737 cytoplasm; GO:0005829 cytosol; GO:0005886 plasma membrane; GO:0016020 membrane; GO:0031264 death-inducing signaling complex; GO:0031265 CD95 death-inducing signaling complex; GO:0032991 protein-containing complex; GO:0071944 cell periphery; GO:0097342 ripoptosome; GO:0098796 membrane protein complex; GO:0098797 plasma membrane protein comp…	GO:0003824 catalytic activity; GO:0004175 endopeptidase activity; GO:0004197 cysteine-type endopeptidase activity; GO:0005488 binding; GO:0005515 protein binding; GO:0008233 peptidase activity; GO:0008234 cysteine-type peptidase activity; GO:0016787 hydrolase activity; GO:0019899 enzyme binding; GO:0019904 protein domain specific binding; GO:0031625 ubiquitin protein ligase binding; GO:0035877 de…	PF00656	PF00656 Caspase domain	PF00656 Caspase domain	D	KOG3573	Caspase, apoptotic cysteine protease
CGIg05222	2354	S	0.32647	0.00638804	Q5JWR5 DOP1_HUMAN Protein dopey-1 OS=Homo sapiens OX=9606 GN=DOP1A PE=2 SV=1	DOP1A	_SKS[Phospho (STY)]FPAK_	1	Up	0.802908	0.674145	0.385195	1.99051	1.8588	1.85487	0.761854	0.838868	0.748293	1.68829	1.65752	1.70096	plasma membrane				GO:0003008 system process; GO:0006810 transport; GO:0006892 post-Golgi vesicle-mediated transport; GO:0006895 Golgi to endosome transport; GO:0006996 organelle organization; GO:0007029 endoplasmic reticulum organization; GO:0007275 multicellular organism development; GO:0009987 cellular process; GO:0010256 endomembrane system organization; GO:0016043 cellular component organization; GO:0016192 ve…	GO:0000139 Golgi membrane; GO:0005622 intracellular anatomical structure; GO:0005737 cytoplasm; GO:0005768 endosome; GO:0005794 Golgi apparatus; GO:0005802 trans-Golgi network; GO:0012505 endomembrane system; GO:0016020 membrane; GO:0031090 organelle membrane; GO:0031410 cytoplasmic vesicle; GO:0031982 vesicle; GO:0031984 organelle subcompartment; GO:0043226 organelle; GO:0043227 membrane-bounded…					K	KOG3613	Dopey and related predicted leucine zipper transcription factors
CGIg05254	597	S	0.262276	0.00026928	Q14149 MORC3_HUMAN MORC family CW-type zinc finger protein 3 OS=Homo sapiens OX=9606 GN=MORC3 PE=1 SV=3	MORC3	_KHS[Phospho (STY)]SDS[Phospho (STY)]IC[Carbamidomethyl (C)]IK_	1	Up	0.431439	0.398171	0.560167	1.65475	1.73202	1.91215	0.525652	0.490672	0.578077	1.96943	2.16664	2.08003	nucleus	K24135	MORC; MORC family CW-type zinc finger protein			GO:0005622 intracellular anatomical structure; GO:0005634 nucleus; GO:0005654 nucleoplasm; GO:0031974 membrane-enclosed lumen; GO:0031981 nuclear lumen; GO:0043226 organelle; GO:0043227 membrane-bounded organelle; GO:0043229 intracellular organelle; GO:0043231 intracellular membrane-bounded organelle; GO:0043233 organelle lumen; GO:0070013 intracellular organelle lumen;		PF13589; PF07496	PF13589 Histidine kinase-, DNA gyrase B-, and HSP90-like ATPase; PF07496 CW-type Zinc Finger		D	KOG1845	MORC family ATPases
CGIg05268	663	S	0.522061	0.0096107	Q9VI75 PICAL_DROME Phosphatidylinositol-binding clathrin assembly protein LAP OS=Drosophila melanogaster OX=7227 GN=lap PE=1 SV=3	lap	_DLDSS[Phospho (STY)]LSQLAGNLNIK_	0.998889	Up	0.731275	0.741654	0.626823	1.49129		1.19007	1.05295	0.955499	0.826049	1.58691	1.43208	1.16857	nucleus	K20044	PICALM; phosphatidylinositol-binding clathrin assembly protein		GO:0000041 transition metal ion transport; GO:0000902 cell morphogenesis; GO:0001558 regulation of cell growth; GO:0002376 immune system process; GO:0002520 immune system development; GO:0003008 system process; GO:0006355 regulation of DNA-templated transcription; GO:0006508 proteolysis; GO:0006511 ubiquitin-dependent protein catabolic process; GO:0006807 nitrogen compound metabolic process; GO:0…	GO:0005622 intracellular anatomical structure; GO:0005634 nucleus; GO:0005737 cytoplasm; GO:0005768 endosome; GO:0005769 early endosome; GO:0005829 cytosol; GO:0005886 plasma membrane; GO:0005905 clathrin-coated pit; GO:0008021 synaptic vesicle; GO:0009986 cell surface; GO:0010008 endosome membrane; GO:0012505 endomembrane system; GO:0012506 vesicle membrane; GO:0014069 postsynaptic density; GO:0…	GO:0000149 SNARE binding; GO:0000822 inositol hexakisphosphate binding; GO:0005102 signaling receptor binding; GO:0005488 binding; GO:0005515 protein binding; GO:0005543 phospholipid binding; GO:0005545 1-phosphatidylinositol binding; GO:0005546 phosphatidylinositol-4,5-bisphosphate binding; GO:0008289 lipid binding; GO:0017124 SH3 domain binding; GO:0019899 enzyme binding; GO:0019900 kinase bind…	PF07651	PF07651 ANTH domain		TU	KOG0251	Clathrin assembly protein AP180 and related proteins, contain ENTH domain
CGIg05273	17	S	0.340579	0.000267544	Q9HBI1 PARVB_HUMAN Beta-parvin OS=Homo sapiens OX=9606 GN=PARVB PE=1 SV=1	PARVB	_KKDES[Phospho (STY)]FLDK_	1	Up	0.466827	0.579451	0.611425	1.65045	1.51532	1.70153	0.337634	0.478674	0.415344	2.05263	2.06518	2.00207	cytoplasm	K06275	PARV; parvin	map04510 Focal adhesion	GO:0000902 cell morphogenesis; GO:0001525 angiogenesis; GO:0001568 blood vessel development; GO:0001944 vasculature development; GO:0002009 morphogenesis of an epithelium; GO:0002040 sprouting angiogenesis; GO:0002165 instar larval or pupal development; GO:0003007 heart morphogenesis; GO:0003148 outflow tract septum morphogenesis; GO:0003151 outflow tract morphogenesis; GO:0003205 cardiac chamber…	GO:0005622 intracellular anatomical structure; GO:0005634 nucleus; GO:0005737 cytoplasm; GO:0005829 cytosol; GO:0005856 cytoskeleton; GO:0005886 plasma membrane; GO:0005912 adherens junction; GO:0005925 focal adhesion; GO:0009925 basal plasma membrane; GO:0015629 actin cytoskeleton; GO:0016020 membrane; GO:0016323 basolateral plasma membrane; GO:0030016 myofibril; GO:0030017 sarcomere; GO:0030018…	GO:0003779 actin binding; GO:0005488 binding; GO:0005515 protein binding; GO:0008092 cytoskeletal protein binding; GO:0019904 protein domain specific binding;	PF00307	PF00307 Calponin homology (CH) domain		Z	KOG3631	Alpha-parvin and related focal adhesion proteins
CGIg05285	31	S	0.121821	5.5312e-07	XP_034332990.1 EF-hand calcium-binding domain-containing protein 6 isoform X6 [Crassostrea gigas]	--	_MS[Phospho (STY)]NRDDLAVLGSAR_	1	Up	0.192562	0.199456	0.196775	1.69182	1.50343	1.63803				1.51964	2.01713	2.08697	mitochondria							PF13833	PF13833 EF-hand domain pair		T	KOG0027	Calmodulin and related proteins (EF-Hand superfamily)
CGIg05299	772	S	0.39213	0.00360092	XP_019919076.2 uncharacterized protein LOC105318788 isoform X5 [Crassostrea gigas]	--	_NEDRNS[Phospho (STY)]YNDVR_	1	Up	0.492159		0.624189	1.55	1.43322	1.28711	0.596709	0.799726	0.720287	1.5301	1.39732	1.52508	nucleus
CGIg05299	816	S	0.353964	0.00243474	XP_019919076.2 uncharacterized protein LOC105318788 isoform X5 [Crassostrea gigas]	--	_NDDRQS[Phospho (STY)]YAEQR_	1	Up	0.784017	0.469335	0.647987	1.64325	1.8632	1.86512	0.587277	0.814224	0.902736	0.974223	2.16768	1.6724	nucleus
CGIg05300	134	T	0.209681	2.92002e-05	P27085 RS26_OCTVU 40S ribosomal protein S26 OS=Octopus vulgaris OX=6645 GN=RPS26 PE=2 SV=1	RPS26	_PGAPGAPPQT[Phospho (STY)]R_	1	Up	0.403915	0.42635	0.502863	2.00164	2.24548	2.11077	0.491286	0.457025	0.387834	1.80356	1.82242	1.73796	cytoplasm	K02976	RP-S26e, RPS26; small subunit ribosomal protein S26e	map03010 Ribosome	GO:0000184 nuclear-transcribed mRNA catabolic process, nonsense-mediated decay; GO:0000956 nuclear-transcribed mRNA catabolic process; GO:0002181 cytoplasmic translation; GO:0006139 nucleobase-containing compound metabolic process; GO:0006401 RNA catabolic process; GO:0006402 mRNA catabolic process; GO:0006412 translation; GO:0006413 translational initiation; GO:0006518 peptide metabolic process;…	GO:0005622 intracellular anatomical structure; GO:0005634 nucleus; GO:0005654 nucleoplasm; GO:0005737 cytoplasm; GO:0005783 endoplasmic reticulum; GO:0005789 endoplasmic reticulum membrane; GO:0005791 rough endoplasmic reticulum; GO:0005829 cytosol; GO:0005840 ribosome; GO:0005844 polysome; GO:0012505 endomembrane system; GO:0015935 small ribosomal subunit; GO:0016020 membrane; GO:0022626 cytosol…	GO:0003676 nucleic acid binding; GO:0003723 RNA binding; GO:0003729 mRNA binding; GO:0003735 structural constituent of ribosome; GO:0005198 structural molecule activity; GO:0005488 binding; GO:0097159 organic cyclic compound binding; GO:1901363 heterocyclic compound binding;				J	KOG1768	40s ribosomal protein S26
CGIg05305	135	S	0.532948	0.0371276	P55866 CASP3_XENLA Caspase-3 OS=Xenopus laevis OX=8355 GN=casp3 PE=2 SV=1	casp3	_S[Phospho (STY)]NENTDGQTQILK_	1	Up	0.613061	0.586888	1.09348	1.54393	1.21147	1.54788		0.306881	0.317375	1.14071	1.24826		cytoplasm	K02187	CASP3; caspase 3 [EC:3.4.22.56]	map04010 MAPK signaling pathway; map04115 p53 signaling pathway; map04210 Apoptosis; map04215 Apoptosis - multiple species; map04650 Natural killer cell mediated cytotoxicity; map04657 IL-17 signaling pathway; map04668 TNF signaling pathway; map04726 Serotonergic synapse				PF00656	PF00656 Caspase domain		D	KOG3573	Caspase, apoptotic cysteine protease
CGIg05305	46	S	0.423827	0.000395527	P55866 CASP3_XENLA Caspase-3 OS=Xenopus laevis OX=8355 GN=casp3 PE=2 SV=1	casp3	_LKLS[Phospho (STY)]PIDLK_	1	Up	0.445178	0.381937	0.494564	1.08569	0.998289	1.03446	0.434577	0.432913	0.537648	0.87901	0.896575	0.832267	cytoplasm	K02187	CASP3; caspase 3 [EC:3.4.22.56]	map04010 MAPK signaling pathway; map04115 p53 signaling pathway; map04210 Apoptosis; map04215 Apoptosis - multiple species; map04650 Natural killer cell mediated cytotoxicity; map04657 IL-17 signaling pathway; map04668 TNF signaling pathway; map04726 Serotonergic synapse				PF00656	PF00656 Caspase domain		D	KOG3573	Caspase, apoptotic cysteine protease
CGIg05317	66	T	0.493257	0.00163977	XP_011418033.1 uncharacterized protein LOC105321461 [Crassostrea gigas]	--	_RMNT[Phospho (STY)]FLIPK_	1	Up	0.84565	0.871248	0.93066	1.52047	1.78405	2.06299	0.957954	0.953456	1.02465	2.21002	2.13487	1.97393	mitochondria
CGIg05362	494	S	0.625998	0.00345727	Q08DA0 RABL6_BOVIN Rab-like protein 6 OS=Bos taurus OX=9913 GN=RABL6 PE=2 SV=1	RABL6	_SVELS[Phospho (STY)]S[Phospho (STY)]DEDENRPAVK_	0.999769	Up	0.794261	0.770893	0.820299	1.46079	1.18013	1.16972	1.26222	0.868992	1.02506	1.11331	1.30012	1.18904	nucleus					GO:0005622 intracellular anatomical structure; GO:0005634 nucleus; GO:0005737 cytoplasm; GO:0005813 centrosome; GO:0005815 microtubule organizing center; GO:0005829 cytosol; GO:0005856 cytoskeleton; GO:0015630 microtubule cytoskeleton; GO:0043226 organelle; GO:0043227 membrane-bounded organelle; GO:0043228 non-membrane-bounded organelle; GO:0043229 intracellular organelle; GO:0043231 intracellula…	GO:0000166 nucleotide binding; GO:0001882 nucleoside binding; GO:0001883 purine nucleoside binding; GO:0005488 binding; GO:0005525 GTP binding; GO:0017076 purine nucleotide binding; GO:0019001 guanyl nucleotide binding; GO:0032549 ribonucleoside binding; GO:0032550 purine ribonucleoside binding; GO:0032553 ribonucleotide binding; GO:0032555 purine ribonucleotide binding; GO:0032561 guanyl ribonuc…	PF08477; PF00071	PF08477 Ras of Complex, Roc, domain of DAPkinase; PF00071 Ras family		TU	KOG0084	GTPase Rab1/YPT1, small G protein superfamily, and related GTP-binding proteins
CGIg05362	495	S	0.625998	0.00345727	Q08DA0 RABL6_BOVIN Rab-like protein 6 OS=Bos taurus OX=9913 GN=RABL6 PE=2 SV=1	RABL6	_SVELS[Phospho (STY)]S[Phospho (STY)]DEDENRPAVK_	0.999769	Up	0.794261	0.770893	0.820299	1.46079	1.18013	1.16972	1.26222	0.868992	1.02506	1.11331	1.30012	1.18904	nucleus					GO:0005622 intracellular anatomical structure; GO:0005634 nucleus; GO:0005737 cytoplasm; GO:0005813 centrosome; GO:0005815 microtubule organizing center; GO:0005829 cytosol; GO:0005856 cytoskeleton; GO:0015630 microtubule cytoskeleton; GO:0043226 organelle; GO:0043227 membrane-bounded organelle; GO:0043228 non-membrane-bounded organelle; GO:0043229 intracellular organelle; GO:0043231 intracellula…	GO:0000166 nucleotide binding; GO:0001882 nucleoside binding; GO:0001883 purine nucleoside binding; GO:0005488 binding; GO:0005525 GTP binding; GO:0017076 purine nucleotide binding; GO:0019001 guanyl nucleotide binding; GO:0032549 ribonucleoside binding; GO:0032550 purine ribonucleoside binding; GO:0032553 ribonucleotide binding; GO:0032555 purine ribonucleotide binding; GO:0032561 guanyl ribonuc…	PF08477; PF00071	PF08477 Ras of Complex, Roc, domain of DAPkinase; PF00071 Ras family		TU	KOG0084	GTPase Rab1/YPT1, small G protein superfamily, and related GTP-binding proteins
CGIg05362	320	S	0.262851	0.000340442	Q08DA0 RABL6_BOVIN Rab-like protein 6 OS=Bos taurus OX=9913 GN=RABL6 PE=2 SV=1	RABL6	_SLS[Phospho (STY)]MPSLQK_	1	Up	0.426213	0.492115	0.480056	2.03017	1.86908	1.42082	0.616755	0.549143	0.565535	1.96076	2.19923	1.69859	nucleus					GO:0005622 intracellular anatomical structure; GO:0005634 nucleus; GO:0005737 cytoplasm; GO:0005813 centrosome; GO:0005815 microtubule organizing center; GO:0005829 cytosol; GO:0005856 cytoskeleton; GO:0015630 microtubule cytoskeleton; GO:0043226 organelle; GO:0043227 membrane-bounded organelle; GO:0043228 non-membrane-bounded organelle; GO:0043229 intracellular organelle; GO:0043231 intracellula…	GO:0000166 nucleotide binding; GO:0001882 nucleoside binding; GO:0001883 purine nucleoside binding; GO:0005488 binding; GO:0005525 GTP binding; GO:0017076 purine nucleotide binding; GO:0019001 guanyl nucleotide binding; GO:0032549 ribonucleoside binding; GO:0032550 purine ribonucleoside binding; GO:0032553 ribonucleotide binding; GO:0032555 purine ribonucleotide binding; GO:0032561 guanyl ribonuc…	PF08477; PF00071	PF08477 Ras of Complex, Roc, domain of DAPkinase; PF00071 Ras family		TU	KOG0084	GTPase Rab1/YPT1, small G protein superfamily, and related GTP-binding proteins
CGIg05363	491	T	0.385583	0.000110425	A7MBH5 ODAD3_BOVIN Outer dynein arm-docking complex subunit 3 OS=Bos taurus OX=9913 GN=ODAD3 PE=1 SV=1	ODAD3	_LPQYNT[Phospho (STY)]R_	1	Up	0.664038	0.648178	0.752148	1.78342	1.65318	1.91729	0.64142	0.647876	0.686957	2.43114	2.01864	1.54377	nucleus	K23733	CCDC151; coiled-coil domain-containing protein 151		GO:0000226 microtubule cytoskeleton organization; GO:0001578 microtubule bundle formation; GO:0003341 cilium movement; GO:0006996 organelle organization; GO:0007010 cytoskeleton organization; GO:0007017 microtubule-based process; GO:0007018 microtubule-based movement; GO:0007275 multicellular organism development; GO:0007368 determination of left/right symmetry; GO:0007389 pattern specification p…	GO:0005622 intracellular anatomical structure; GO:0005737 cytoplasm; GO:0005814 centriole; GO:0005815 microtubule organizing center; GO:0005856 cytoskeleton; GO:0005929 cilium; GO:0005930 axoneme; GO:0015630 microtubule cytoskeleton; GO:0031514 motile cilium; GO:0032838 plasma membrane bounded cell projection cytoplasm; GO:0035253 ciliary rootlet; GO:0036064 ciliary basal body; GO:0042995 cell pr…
CGIg05366	10	S	0.0783916	0.000344247	XP_011456169.2 uncharacterized protein LOC105348451 isoform X1 [Crassostrea gigas]	--	_HGDS[Phospho (STY)]LELLSGVVLK_	1	Up	0.091965	0.135109	0.200755	1.95803	1.71723	1.78232	0.100431	0.185206	0.147472	1.48228	1.77642	1.22466	cytoplasm
CGIg05399	183	S	0.479388	0.00169743	Q24799 MYPH_ECHGR Myophilin OS=Echinococcus granulosus OX=6210 PE=2 SV=1	--	_GAS[Phospho (STY)]QSGMNFGK_	1	Up	0.763133	0.742504	0.661578	1.31763	1.76652	1.43664	0.513497	0.532814	0.470558	1.80046	1.42861	1.58585	cytoplasm	K20526	TAGLN; transgelin		GO:0009888 tissue development; GO:0009987 cellular process; GO:0030154 cell differentiation; GO:0030855 epithelial cell differentiation; GO:0032502 developmental process; GO:0032780 negative regulation of ATP-dependent activity; GO:0043086 negative regulation of catalytic activity; GO:0043462 regulation of ATP-dependent activity; GO:0044092 negative regulation of molecular function; GO:0048856 an…	GO:0005622 intracellular anatomical structure; GO:0005737 cytoplasm; GO:0005829 cytosol; GO:0005856 cytoskeleton; GO:0005874 microtubule; GO:0005884 actin filament; GO:0014069 postsynaptic density; GO:0015629 actin cytoskeleton; GO:0015630 microtubule cytoskeleton; GO:0030425 dendrite; GO:0032279 asymmetric synapse; GO:0036477 somatodendritic compartment; GO:0042995 cell projection; GO:0043005 ne…	GO:0005488 binding; GO:0005515 protein binding; GO:0008017 microtubule binding; GO:0008092 cytoskeletal protein binding; GO:0015631 tubulin binding; GO:0030674 protein-macromolecule adaptor activity; GO:0060090 molecular adaptor activity;	PF00307	PF00307 Calponin homology (CH) domain		Z	KOG2046	Calponin
CGIg05403	378	T	0.429886	0.00548715	XP_011445482.2 serine/arginine repetitive matrix protein 5 isoform X1 [Crassostrea gigas]	--	_RET[Phospho (STY)]ISEDEK_	1	Up	0.50319	0.798451	0.525704	1.51508	1.47776	1.25792	0.457213	0.913364	0.720816	0.69321	1.07521	1.00068	nucleus	K16685	WWC1; protein KIBRA	map04390 Hippo signaling pathway; map04391 Hippo signaling pathway - fly; map04392 Hippo signaling pathway - multiple species	GO:0000278 mitotic cell cycle; GO:0000281 mitotic cytokinesis; GO:0000910 cytokinesis; GO:0006996 organelle organization; GO:0007010 cytoskeleton organization; GO:0007015 actin filament organization; GO:0007049 cell cycle; GO:0009987 cellular process; GO:0016043 cellular component organization; GO:0022402 cell cycle process; GO:0030029 actin filament-based process; GO:0030036 actin cytoskeleton o…	GO:0005622 intracellular anatomical structure; GO:0005634 nucleus; GO:0005737 cytoplasm; GO:0005938 cell cortex; GO:0043226 organelle; GO:0043227 membrane-bounded organelle; GO:0043229 intracellular organelle; GO:0043231 intracellular membrane-bounded organelle; GO:0071944 cell periphery; GO:0099568 cytoplasmic region;	GO:0005488 binding; GO:0005515 protein binding; GO:0005516 calmodulin binding;	PF00397	PF00397 WW domain		O	KOG0940	Ubiquitin protein ligase RSP5/NEDD4
CGIg05408	371	S	0.587335	0.0040314	Q96Q42 ALS2_HUMAN Alsin OS=Homo sapiens OX=9606 GN=ALS2 PE=1 SV=2	ALS2	_S[Phospho (STY)]VSFVNEEEAR_	0.999985	Up	0.668778	0.806205	0.745045	1.28105	1.4004	1.09839	0.666518	0.763154	0.792956	1.39295	1.30045	1.35953	nucleus	K04575	ALS2; amyotrophic lateral sclerosis 2 protein		GO:0000902 cell morphogenesis; GO:0001662 behavioral fear response; GO:0001701 in utero embryonic development; GO:0001881 receptor recycling; GO:0001932 regulation of protein phosphorylation; GO:0001934 positive regulation of protein phosphorylation; GO:0002209 behavioral defense response; GO:0002252 immune effector process; GO:0002376 immune system process; GO:0006582 melanin metabolic process; …	GO:0001726 ruffle; GO:0005622 intracellular anatomical structure; GO:0005634 nucleus; GO:0005737 cytoplasm; GO:0005768 endosome; GO:0005769 early endosome; GO:0005813 centrosome; GO:0005815 microtubule organizing center; GO:0005829 cytosol; GO:0005856 cytoskeleton; GO:0012505 endomembrane system; GO:0014069 postsynaptic density; GO:0015630 microtubule cytoskeleton; GO:0016020 membrane; GO:0030027…	GO:0005085 guanyl-nucleotide exchange factor activity; GO:0005096 GTPase activator activity; GO:0005488 binding; GO:0005515 protein binding; GO:0008047 enzyme activator activity; GO:0019207 kinase regulator activity; GO:0019209 kinase activator activity; GO:0019887 protein kinase regulator activity; GO:0019899 enzyme binding; GO:0030234 enzyme regulator activity; GO:0030295 protein kinase activat…				S	KOG1426	FOG: RCC1 domain
CGIg05409	233	T	0.505297	0.0235719	XP_011426897.2 uncharacterized protein LOC105327914 [Crassostrea gigas]	--	_GYPAGTVT[Phospho (STY)]K_	0.999984	Up	0.942671	0.577901	0.706127	1.65595	1.6374	1.11337	1.07687	1.02018	1.46446		1.32505	1.26116	nucleus							PF00339; PF02752	PF00339 Arrestin (or S-antigen), N-terminal domain; PF02752 Arrestin (or S-antigen), C-terminal domain		R	KOG3780	Thioredoxin binding protein TBP-2/VDUP1
CGIg05409	583	S	0.484919	0.0128662	XP_011426897.2 uncharacterized protein LOC105327914 [Crassostrea gigas]	--	_RNS[Phospho (STY)]VPVFNRPK_	1	Up	0.893323	0.767788	0.775851	1.7968	2.0238	1.20491	0.897179	0.823799	1.26181	0.873966	1.42973	1.57546	nucleus							PF00339; PF02752	PF00339 Arrestin (or S-antigen), N-terminal domain; PF02752 Arrestin (or S-antigen), C-terminal domain		R	KOG3780	Thioredoxin binding protein TBP-2/VDUP1
CGIg05409	385	S	0.255993	0.0019959	XP_011426897.2 uncharacterized protein LOC105327914 [Crassostrea gigas]	--	_IC[Carbamidomethyl (C)]DEIGSSS[Phospho (STY)]AR_	0.999999	Up	0.648737	0.437549	0.398921	2.15715	2.14287	1.50172	0.87354	0.726143	1.04909	1.14132	1.49169	1.42522	nucleus							PF00339; PF02752	PF00339 Arrestin (or S-antigen), N-terminal domain; PF02752 Arrestin (or S-antigen), C-terminal domain		R	KOG3780	Thioredoxin binding protein TBP-2/VDUP1
CGIg05420	372	Y	0.540949	0.0047389	XP_034301830.1 uncharacterized protein LOC105345013 isoform X1 [Crassostrea gigas]	--	_RELHY[Phospho (STY)]ADLDIATQPPGTK_	1	Up	1.10074	1.04474	1.47113	2.15751	2.17366	2.35451	1.86183	1.30204	1.33737	0.777954	0.664737	0.52519	nucleus	K13429	CERK1; chitin elicitor receptor kinase 1
CGIg05420	338	Y	0.315871	0.000587348	XP_034301830.1 uncharacterized protein LOC105345013 isoform X1 [Crassostrea gigas]	--	_TKEDVPGYNGPANPEGPVY[Phospho (STY)]SVPVK_	1	Up	0.788479	0.994865	0.957368	2.47284	2.81667	3.38716	1.59235	1.31159	1.20574	1.50062	1.22172	1.03918	nucleus	K13429	CERK1; chitin elicitor receptor kinase 1
CGIg05443	443	S	0.621267	0.000425538	Q8CDU5 EFHB_MOUSE EF-hand domain-containing family member B OS=Mus musculus OX=10090 GN=Efhb PE=1 SV=2	Efhb	_S[Phospho (STY)]PQSAESTPR_	1	Up	0.667073	0.671612	0.642894	1.02427	1.15396	1.01135	0.724637	0.791896	0.646385	1.11725	0.967792	1.0247	cytoplasm,nucleus	K23929	EFHB; EF-hand domain-containing family member B					PF13499	PF13499 EF-hand domain pair
CGIg05443	259	S	0.551577	0.0112772	Q8CDU5 EFHB_MOUSE EF-hand domain-containing family member B OS=Mus musculus OX=10090 GN=Efhb PE=1 SV=2	Efhb	_S[Phospho (STY)]QPQLGQVHDPIKDTLK_	1	Up	1.07062	0.732662	1.00404	1.558	1.59712	1.93452	1.04304	1.17905		1.86907	1.69508	1.7354	cytoplasm,nucleus	K23929	EFHB; EF-hand domain-containing family member B					PF13499	PF13499 EF-hand domain pair
CGIg05443	402	S	0.320928	0.00102532	Q8CDU5 EFHB_MOUSE EF-hand domain-containing family member B OS=Mus musculus OX=10090 GN=Efhb PE=1 SV=2	Efhb	_MKS[Phospho (STY)]GLPEK_	1	Up	0.41353	0.570706	0.539653	1.65053	1.77529	1.32256	0.542839	0.823645	0.678243	1.66718	1.51508	1.50656	cytoplasm,nucleus	K23929	EFHB; EF-hand domain-containing family member B					PF13499	PF13499 EF-hand domain pair
CGIg05443	35	S	0.294014	0.000153107	Q8CDU5 EFHB_MOUSE EF-hand domain-containing family member B OS=Mus musculus OX=10090 GN=Efhb PE=1 SV=2	Efhb	_LTS[Phospho (STY)]C[Carbamidomethyl (C)]GDTAIQC[Carbamidomethyl (C)]LKPK_	0.997383	Up	0.424049	0.400968		1.49471	1.39199	1.32236	0.699276		0.559112	1.33083	1.19031		cytoplasm,nucleus	K23929	EFHB; EF-hand domain-containing family member B					PF13499	PF13499 EF-hand domain pair
CGIg05445	225	S	0.463288	0.000210141	Q9BZF3 OSBL6_HUMAN Oxysterol-binding protein-related protein 6 OS=Homo sapiens OX=9606 GN=OSBPL6 PE=1 SV=1	OSBPL6	_LTEITS[Phospho (STY)]PVEDR_	1	Up	0.517782	0.510723	0.489374	1.04273	1.21879	1.0148		0.367291	0.422903	0.779224	0.701077	0.689179	nucleus	K20463	OSBPL3_6_7, ORP3_6_7; oxysterol-binding protein-related protein 3/6/7					PF15409	PF15409 Pleckstrin homology domain		I	KOG1737	Oxysterol-binding protein
CGIg05450	206	S	0.333585	0.000979548	Q9Z2F6 BCL3_MOUSE B-cell lymphoma 3 protein homolog OS=Mus musculus OX=10090 GN=Bcl3 PE=1 SV=2	Bcl3	_VPHSQQHS[Phospho (STY)]YK_	1	Up	0.58805	0.643462	0.611776	1.42696	2.12912	1.96962	0.78678	0.670179	0.501967	1.74064	1.06698	1.83119	cytoplasm,nucleus	K02580	NFKB1; nuclear factor NF-kappa-B p105 subunit	map04010 MAPK signaling pathway; map04014 Ras signaling pathway; map04024 cAMP signaling pathway; map04062 Chemokine signaling pathway; map04064 NF-kappa B signaling pathway; map04066 HIF-1 signaling pathway; map04071 Sphingolipid signaling pathway; map04151 PI3K-Akt signaling pathway; map04210 Apoptosis; map04211 Longevity regulating pathway; map04218 Cellular senescence; map04380 Osteoclast dif…	GO:0002253 activation of immune response; GO:0002376 immune system process; GO:0002429 immune response-activating cell surface receptor signaling pathway; GO:0002682 regulation of immune system process; GO:0002684 positive regulation of immune system process; GO:0002694 regulation of leukocyte activation; GO:0002696 positive regulation of leukocyte activation; GO:0002697 regulation of immune effe…	GO:0005622 intracellular anatomical structure; GO:0005634 nucleus; GO:0005654 nucleoplasm; GO:0005737 cytoplasm; GO:0016604 nuclear body; GO:0016607 nuclear speck; GO:0031974 membrane-enclosed lumen; GO:0031981 nuclear lumen; GO:0032991 protein-containing complex; GO:0035770 ribonucleoprotein granule; GO:0036464 cytoplasmic ribonucleoprotein granule; GO:0043226 organelle; GO:0043227 membrane-boun…	GO:0003712 transcription coregulator activity; GO:0140110 transcription regulator activity;				R	KOG0504	FOG: Ankyrin repeat
CGIg05464	1214	S	0.580222	0.019682	Q14C86 GAPD1_HUMAN GTPase-activating protein and VPS9 domain-containing protein 1 OS=Homo sapiens OX=9606 GN=GAPVD1 PE=1 SV=2	GAPVD1	_SASFDNVS[Phospho (STY)]DKS[Phospho (STY)]EEKEAAAAK_	1	Up	0.659439	0.833921	0.791423	1.62452	1.06715	1.2461	0.572628	0.949123	0.682775	1.75324	1.44395	1.71382	plasma membrane				GO:0006810 transport; GO:0006897 endocytosis; GO:0009966 regulation of signal transduction; GO:0009987 cellular process; GO:0010646 regulation of cell communication; GO:0016043 cellular component organization; GO:0016192 vesicle-mediated transport; GO:0018996 molting cycle, collagen and cuticulin-based cuticle; GO:0023051 regulation of signaling; GO:0030100 regulation of endocytosis; GO:0032483 r…	GO:0005622 intracellular anatomical structure; GO:0005737 cytoplasm; GO:0005768 endosome; GO:0005769 early endosome; GO:0005829 cytosol; GO:0005886 plasma membrane; GO:0012505 endomembrane system; GO:0016020 membrane; GO:0030135 coated vesicle; GO:0030136 clathrin-coated vesicle; GO:0030139 endocytic vesicle; GO:0031410 cytoplasmic vesicle; GO:0031982 vesicle; GO:0043226 organelle; GO:0043227 mem…	GO:0005085 guanyl-nucleotide exchange factor activity; GO:0005488 binding; GO:0005515 protein binding; GO:0019899 enzyme binding; GO:0031267 small GTPase binding; GO:0032794 GTPase activating protein binding; GO:0051020 GTPase binding; GO:0098772 molecular function regulator activity;	PF18151	PF18151 Domain of unknown function (DUF5601)		U	KOG2319	Vacuolar assembly/sorting protein VPS9
CGIg05464	616	T	0.530856	0.000539633	Q14C86 GAPD1_HUMAN GTPase-activating protein and VPS9 domain-containing protein 1 OS=Homo sapiens OX=9606 GN=GAPVD1 PE=1 SV=2	GAPVD1	_DT[Phospho (STY)]PLSQAGSVEEPPPPQMPLPEIPPLPETVPKPNR_	0.99697	Up	0.699819	0.739293	0.741261	1.49729	1.22134	1.38865	0.753427	0.886263	0.783915	0.708601	0.504167	0.703083	plasma membrane				GO:0006810 transport; GO:0006897 endocytosis; GO:0009966 regulation of signal transduction; GO:0009987 cellular process; GO:0010646 regulation of cell communication; GO:0016043 cellular component organization; GO:0016192 vesicle-mediated transport; GO:0018996 molting cycle, collagen and cuticulin-based cuticle; GO:0023051 regulation of signaling; GO:0030100 regulation of endocytosis; GO:0032483 r…	GO:0005622 intracellular anatomical structure; GO:0005737 cytoplasm; GO:0005768 endosome; GO:0005769 early endosome; GO:0005829 cytosol; GO:0005886 plasma membrane; GO:0012505 endomembrane system; GO:0016020 membrane; GO:0030135 coated vesicle; GO:0030136 clathrin-coated vesicle; GO:0030139 endocytic vesicle; GO:0031410 cytoplasmic vesicle; GO:0031982 vesicle; GO:0043226 organelle; GO:0043227 mem…	GO:0005085 guanyl-nucleotide exchange factor activity; GO:0005488 binding; GO:0005515 protein binding; GO:0019899 enzyme binding; GO:0031267 small GTPase binding; GO:0032794 GTPase activating protein binding; GO:0051020 GTPase binding; GO:0098772 molecular function regulator activity;	PF18151	PF18151 Domain of unknown function (DUF5601)		U	KOG2319	Vacuolar assembly/sorting protein VPS9
CGIg05464	775	S	0.0256257	0.0187221	Q14C86 GAPD1_HUMAN GTPase-activating protein and VPS9 domain-containing protein 1 OS=Homo sapiens OX=9606 GN=GAPVD1 PE=1 SV=2	GAPVD1	_RSPS[Phospho (STY)]EDLPIGQGMEASGGAEAAVPLLPAK_	0.994341	Up	0.0305314	0.0379226			1.33196	1.33934	0.0395362		1.36359	1.56442	1.15761	0.0426389	plasma membrane				GO:0006810 transport; GO:0006897 endocytosis; GO:0009966 regulation of signal transduction; GO:0009987 cellular process; GO:0010646 regulation of cell communication; GO:0016043 cellular component organization; GO:0016192 vesicle-mediated transport; GO:0018996 molting cycle, collagen and cuticulin-based cuticle; GO:0023051 regulation of signaling; GO:0030100 regulation of endocytosis; GO:0032483 r…	GO:0005622 intracellular anatomical structure; GO:0005737 cytoplasm; GO:0005768 endosome; GO:0005769 early endosome; GO:0005829 cytosol; GO:0005886 plasma membrane; GO:0012505 endomembrane system; GO:0016020 membrane; GO:0030135 coated vesicle; GO:0030136 clathrin-coated vesicle; GO:0030139 endocytic vesicle; GO:0031410 cytoplasmic vesicle; GO:0031982 vesicle; GO:0043226 organelle; GO:0043227 mem…	GO:0005085 guanyl-nucleotide exchange factor activity; GO:0005488 binding; GO:0005515 protein binding; GO:0019899 enzyme binding; GO:0031267 small GTPase binding; GO:0032794 GTPase activating protein binding; GO:0051020 GTPase binding; GO:0098772 molecular function regulator activity;	PF18151	PF18151 Domain of unknown function (DUF5601)		U	KOG2319	Vacuolar assembly/sorting protein VPS9
CGIg05500	119	S	0.546937	0.00858003	O01391 UCHL_APLCA Ubiquitin carboxyl-terminal hydrolase OS=Aplysia californica OX=6500 GN=UCH PE=2 SV=1	UCH	_NTVNMS[Phospho (STY)]PEK_	1	Up	0.559754	0.671175	0.671509	0.925997	1.24052	1.31184	0.515009	0.429567	0.561281	0.973824	0.942369	0.973927	cytoplasm	K05609	UCHL3, YUH1; ubiquitin carboxyl-terminal hydrolase L3 [EC:3.4.19.12]		GO:0001654 eye development; GO:0006508 proteolysis; GO:0006807 nitrogen compound metabolic process; GO:0007275 multicellular organism development; GO:0007423 sensory organ development; GO:0007610 behavior; GO:0007626 locomotory behavior; GO:0007628 adult walking behavior; GO:0007631 feeding behavior; GO:0008152 metabolic process; GO:0008344 adult locomotory behavior; GO:0009056 catabolic process;…	GO:0005622 intracellular anatomical structure; GO:0005634 nucleus; GO:0005737 cytoplasm; GO:0005829 cytosol; GO:0043226 organelle; GO:0043227 membrane-bounded organelle; GO:0043229 intracellular organelle; GO:0043231 intracellular membrane-bounded organelle;	GO:0003824 catalytic activity; GO:0004843 cysteine-type deubiquitinase activity; GO:0005488 binding; GO:0005515 protein binding; GO:0008233 peptidase activity; GO:0008234 cysteine-type peptidase activity; GO:0016787 hydrolase activity; GO:0019783 ubiquitin-like protein peptidase activity; GO:0019784 deNEDDylase activity; GO:0032182 ubiquitin-like protein binding; GO:0043130 ubiquitin binding; GO:…	PF01088	PF01088 Ubiquitin carboxyl-terminal hydrolase, family 1	PF01088 Ubiquitin carboxyl-terminal hydrolase, family 1	O	KOG1415	Ubiquitin C-terminal hydrolase UCHL1
CGIg05500	131	T	0.445339	0.00177924	O01391 UCHL_APLCA Ubiquitin carboxyl-terminal hydrolase OS=Aplysia californica OX=6500 GN=UCH PE=2 SV=1	UCH	_AEVLQEDT[Phospho (STY)]DMGSAHDDTAQEGQTK_	1	Up		0.713836	0.625728	1.37196	1.56118	1.5788	1.05059	0.717585	0.676037	1.43925	1.72885	1.45519	cytoplasm	K05609	UCHL3, YUH1; ubiquitin carboxyl-terminal hydrolase L3 [EC:3.4.19.12]		GO:0001654 eye development; GO:0006508 proteolysis; GO:0006807 nitrogen compound metabolic process; GO:0007275 multicellular organism development; GO:0007423 sensory organ development; GO:0007610 behavior; GO:0007626 locomotory behavior; GO:0007628 adult walking behavior; GO:0007631 feeding behavior; GO:0008152 metabolic process; GO:0008344 adult locomotory behavior; GO:0009056 catabolic process;…	GO:0005622 intracellular anatomical structure; GO:0005634 nucleus; GO:0005737 cytoplasm; GO:0005829 cytosol; GO:0043226 organelle; GO:0043227 membrane-bounded organelle; GO:0043229 intracellular organelle; GO:0043231 intracellular membrane-bounded organelle;	GO:0003824 catalytic activity; GO:0004843 cysteine-type deubiquitinase activity; GO:0005488 binding; GO:0005515 protein binding; GO:0008233 peptidase activity; GO:0008234 cysteine-type peptidase activity; GO:0016787 hydrolase activity; GO:0019783 ubiquitin-like protein peptidase activity; GO:0019784 deNEDDylase activity; GO:0032182 ubiquitin-like protein binding; GO:0043130 ubiquitin binding; GO:…	PF01088	PF01088 Ubiquitin carboxyl-terminal hydrolase, family 1	PF01088 Ubiquitin carboxyl-terminal hydrolase, family 1	O	KOG1415	Ubiquitin C-terminal hydrolase UCHL1
CGIg05500	74	Y	0.145501	0.000173106	O01391 UCHL_APLCA Ubiquitin carboxyl-terminal hydrolase OS=Aplysia californica OX=6500 GN=UCH PE=2 SV=1	UCH	_QDSDLY[Phospho (STY)]FVK_	1	Up	0.166681	0.200455		1.17351	1.29679	1.3146				1.30922	1.24409	1.08908	cytoplasm	K05609	UCHL3, YUH1; ubiquitin carboxyl-terminal hydrolase L3 [EC:3.4.19.12]		GO:0001654 eye development; GO:0006508 proteolysis; GO:0006807 nitrogen compound metabolic process; GO:0007275 multicellular organism development; GO:0007423 sensory organ development; GO:0007610 behavior; GO:0007626 locomotory behavior; GO:0007628 adult walking behavior; GO:0007631 feeding behavior; GO:0008152 metabolic process; GO:0008344 adult locomotory behavior; GO:0009056 catabolic process;…	GO:0005622 intracellular anatomical structure; GO:0005634 nucleus; GO:0005737 cytoplasm; GO:0005829 cytosol; GO:0043226 organelle; GO:0043227 membrane-bounded organelle; GO:0043229 intracellular organelle; GO:0043231 intracellular membrane-bounded organelle;	GO:0003824 catalytic activity; GO:0004843 cysteine-type deubiquitinase activity; GO:0005488 binding; GO:0005515 protein binding; GO:0008233 peptidase activity; GO:0008234 cysteine-type peptidase activity; GO:0016787 hydrolase activity; GO:0019783 ubiquitin-like protein peptidase activity; GO:0019784 deNEDDylase activity; GO:0032182 ubiquitin-like protein binding; GO:0043130 ubiquitin binding; GO:…	PF01088	PF01088 Ubiquitin carboxyl-terminal hydrolase, family 1	PF01088 Ubiquitin carboxyl-terminal hydrolase, family 1	O	KOG1415	Ubiquitin C-terminal hydrolase UCHL1
CGIg05501	1252	S	0.515271	0.034716	Q86TI0 TBCD1_HUMAN TBC1 domain family member 1 OS=Homo sapiens OX=9606 GN=TBC1D1 PE=1 SV=2	TBC1D1	_LDISLPPLSPSLSSSPIHQPHS[Phospho (STY)]NNSIR_	0.97588	Up	0.394651	0.387786			0.726303	0.792193	0.424854			2.84076	1.06386	2.48143	cytoplasm	K17902	TBC1D4, AS160; TBC1 domain family member 4	map04919 Thyroid hormone signaling pathway	GO:0006810 transport; GO:0006886 intracellular protein transport; GO:0007155 cell adhesion; GO:0008104 protein localization; GO:0009719 response to endogenous stimulus; GO:0009725 response to hormone; GO:0009987 cellular process; GO:0010033 response to organic substance; GO:0010243 response to organonitrogen compound; GO:0010639 negative regulation of organelle organization; GO:0015031 protein tr…	GO:0005622 intracellular anatomical structure; GO:0005737 cytoplasm; GO:0005794 Golgi apparatus; GO:0005829 cytosol; GO:0009986 cell surface; GO:0012505 endomembrane system; GO:0012506 vesicle membrane; GO:0016020 membrane; GO:0030659 cytoplasmic vesicle membrane; GO:0031090 organelle membrane; GO:0031410 cytoplasmic vesicle; GO:0031982 vesicle; GO:0043226 organelle; GO:0043227 membrane-bounded o…	GO:0005096 GTPase activator activity; GO:0005102 signaling receptor binding; GO:0005178 integrin binding; GO:0005488 binding; GO:0005515 protein binding; GO:0008047 enzyme activator activity; GO:0019899 enzyme binding; GO:0030234 enzyme regulator activity; GO:0030695 GTPase regulator activity; GO:0031267 small GTPase binding; GO:0044877 protein-containing complex binding; GO:0050839 cell adhesion…				R	KOG4436	Predicted GTPase activator NB4S/EVI5 (contains TBC domain)/Calmodulin-binding protein Pollux (contains PTB and TBC domains)
CGIg05501	1144	S	0.426255	0.0131827	Q86TI0 TBCD1_HUMAN TBC1 domain family member 1 OS=Homo sapiens OX=9606 GN=TBC1D1 PE=1 SV=2	TBC1D1	_EEMLFS[Phospho (STY)]PQR_	1	Up	0.367408		0.481974	0.899602	0.891216	1.19818	0.437632	0.367702	0.431151	0.622158	0.584379	0.690223	cytoplasm	K17902	TBC1D4, AS160; TBC1 domain family member 4	map04919 Thyroid hormone signaling pathway	GO:0006810 transport; GO:0006886 intracellular protein transport; GO:0007155 cell adhesion; GO:0008104 protein localization; GO:0009719 response to endogenous stimulus; GO:0009725 response to hormone; GO:0009987 cellular process; GO:0010033 response to organic substance; GO:0010243 response to organonitrogen compound; GO:0010639 negative regulation of organelle organization; GO:0015031 protein tr…	GO:0005622 intracellular anatomical structure; GO:0005737 cytoplasm; GO:0005794 Golgi apparatus; GO:0005829 cytosol; GO:0009986 cell surface; GO:0012505 endomembrane system; GO:0012506 vesicle membrane; GO:0016020 membrane; GO:0030659 cytoplasmic vesicle membrane; GO:0031090 organelle membrane; GO:0031410 cytoplasmic vesicle; GO:0031982 vesicle; GO:0043226 organelle; GO:0043227 membrane-bounded o…	GO:0005096 GTPase activator activity; GO:0005102 signaling receptor binding; GO:0005178 integrin binding; GO:0005488 binding; GO:0005515 protein binding; GO:0008047 enzyme activator activity; GO:0019899 enzyme binding; GO:0030234 enzyme regulator activity; GO:0030695 GTPase regulator activity; GO:0031267 small GTPase binding; GO:0044877 protein-containing complex binding; GO:0050839 cell adhesion…				R	KOG4436	Predicted GTPase activator NB4S/EVI5 (contains TBC domain)/Calmodulin-binding protein Pollux (contains PTB and TBC domains)
CGIg05501	1270	S	0.241372	5.92216e-06	Q86TI0 TBCD1_HUMAN TBC1 domain family member 1 OS=Homo sapiens OX=9606 GN=TBC1D1 PE=1 SV=2	TBC1D1	_SLSS[Phospho (STY)]PLSELGSK_	1	Up	0.30608	0.330597	0.349108	1.41572	1.36398	1.30439	0.322156	0.351677	0.287291	1.19557	1.18032	1.25748	cytoplasm	K17902	TBC1D4, AS160; TBC1 domain family member 4	map04919 Thyroid hormone signaling pathway	GO:0006810 transport; GO:0006886 intracellular protein transport; GO:0007155 cell adhesion; GO:0008104 protein localization; GO:0009719 response to endogenous stimulus; GO:0009725 response to hormone; GO:0009987 cellular process; GO:0010033 response to organic substance; GO:0010243 response to organonitrogen compound; GO:0010639 negative regulation of organelle organization; GO:0015031 protein tr…	GO:0005622 intracellular anatomical structure; GO:0005737 cytoplasm; GO:0005794 Golgi apparatus; GO:0005829 cytosol; GO:0009986 cell surface; GO:0012505 endomembrane system; GO:0012506 vesicle membrane; GO:0016020 membrane; GO:0030659 cytoplasmic vesicle membrane; GO:0031090 organelle membrane; GO:0031410 cytoplasmic vesicle; GO:0031982 vesicle; GO:0043226 organelle; GO:0043227 membrane-bounded o…	GO:0005096 GTPase activator activity; GO:0005102 signaling receptor binding; GO:0005178 integrin binding; GO:0005488 binding; GO:0005515 protein binding; GO:0008047 enzyme activator activity; GO:0019899 enzyme binding; GO:0030234 enzyme regulator activity; GO:0030695 GTPase regulator activity; GO:0031267 small GTPase binding; GO:0044877 protein-containing complex binding; GO:0050839 cell adhesion…				R	KOG4436	Predicted GTPase activator NB4S/EVI5 (contains TBC domain)/Calmodulin-binding protein Pollux (contains PTB and TBC domains)
CGIg05501	534	S	0.071703	2.6219e-05	Q86TI0 TBCD1_HUMAN TBC1 domain family member 1 OS=Homo sapiens OX=9606 GN=TBC1D1 PE=1 SV=2	TBC1D1	_EFS[Phospho (STY)]LFENR_	1	Up	0.0698143	0.0977306	0.0962205	1.35406	1.14191	1.18262				1.43248	1.21972	1.32379	cytoplasm	K17902	TBC1D4, AS160; TBC1 domain family member 4	map04919 Thyroid hormone signaling pathway	GO:0006810 transport; GO:0006886 intracellular protein transport; GO:0007155 cell adhesion; GO:0008104 protein localization; GO:0009719 response to endogenous stimulus; GO:0009725 response to hormone; GO:0009987 cellular process; GO:0010033 response to organic substance; GO:0010243 response to organonitrogen compound; GO:0010639 negative regulation of organelle organization; GO:0015031 protein tr…	GO:0005622 intracellular anatomical structure; GO:0005737 cytoplasm; GO:0005794 Golgi apparatus; GO:0005829 cytosol; GO:0009986 cell surface; GO:0012505 endomembrane system; GO:0012506 vesicle membrane; GO:0016020 membrane; GO:0030659 cytoplasmic vesicle membrane; GO:0031090 organelle membrane; GO:0031410 cytoplasmic vesicle; GO:0031982 vesicle; GO:0043226 organelle; GO:0043227 membrane-bounded o…	GO:0005096 GTPase activator activity; GO:0005102 signaling receptor binding; GO:0005178 integrin binding; GO:0005488 binding; GO:0005515 protein binding; GO:0008047 enzyme activator activity; GO:0019899 enzyme binding; GO:0030234 enzyme regulator activity; GO:0030695 GTPase regulator activity; GO:0031267 small GTPase binding; GO:0044877 protein-containing complex binding; GO:0050839 cell adhesion…				R	KOG4436	Predicted GTPase activator NB4S/EVI5 (contains TBC domain)/Calmodulin-binding protein Pollux (contains PTB and TBC domains)
CGIg05502	427	T	0.370594	4.90309e-05	XP_022323390.1 uncharacterized protein LOC111124635 isoform X1 [Crassostrea virginica]	--	_GVIT[Phospho (STY)]PLPPNIR_	1	Up	0.453793	0.495533	0.471915	1.40057	1.21752	1.21695	0.556867	0.531468	0.534689	0.984543	1.00176	1.08811	nucleus	K24456	KY; kyphoscoliosis peptidase [EC:3.4.-.-]								D	KOG4575	TGc (transglutaminase/protease-like) domain-containing protein involved in cytokinesis
CGIg05502	42	T	0.24214	0.00136567	XP_022323390.1 uncharacterized protein LOC111124635 isoform X1 [Crassostrea virginica]	--	_EVPT[Phospho (STY)]PELLR_	1	Up	0.121993	0.217137	0.199816	0.781548	0.740139	0.704082	0.206207	0.17526	0.23717	0.473317	0.462653	0.42491	nucleus	K24456	KY; kyphoscoliosis peptidase [EC:3.4.-.-]								D	KOG4575	TGc (transglutaminase/protease-like) domain-containing protein involved in cytokinesis
CGIg05512	328	S	0.60227	0.032504	Q13905 RPGF1_HUMAN Rap guanine nucleotide exchange factor 1 OS=Homo sapiens OX=9606 GN=RAPGEF1 PE=1 SV=3	RAPGEF1	_LGS[Phospho (STY)]TSDVYQTPSSR_	0.999894	Up	0.796409	0.801556	0.948115	1.46828	1.0549	1.7043	0.919485	0.919989	0.653789	1.56481	1.65919	1.96505	nucleus	K06277	RAPGEF1, GRF2; Rap guanine nucleotide exchange factor 1	map04015 Rap1 signaling pathway; map04510 Focal adhesion; map04722 Neurotrophin signaling pathway; map04910 Insulin signaling pathway	GO:0001885 endothelial cell development; GO:0001932 regulation of protein phosphorylation; GO:0001934 positive regulation of protein phosphorylation; GO:0002064 epithelial cell development; GO:0003158 endothelium development; GO:0006996 organelle organization; GO:0007010 cytoskeleton organization; GO:0007154 cell communication; GO:0007165 signal transduction; GO:0007166 cell surface receptor sign…	GO:0005622 intracellular anatomical structure; GO:0005737 cytoplasm; GO:0005768 endosome; GO:0005769 early endosome; GO:0005829 cytosol; GO:0012505 endomembrane system; GO:0031410 cytoplasmic vesicle; GO:0031982 vesicle; GO:0043226 organelle; GO:0043227 membrane-bounded organelle; GO:0043229 intracellular organelle; GO:0097708 intracellular vesicle;	GO:0005085 guanyl-nucleotide exchange factor activity; GO:0005488 binding; GO:0005515 protein binding; GO:0019899 enzyme binding; GO:0031267 small GTPase binding; GO:0051020 GTPase binding; GO:0098772 molecular function regulator activity;	PF00618	PF00618 RasGEF N-terminal motif		T	KOG3417	Ras1 guanine nucleotide exchange factor
CGIg05512	233	T	0.104597	0.000237688	Q13905 RPGF1_HUMAN Rap guanine nucleotide exchange factor 1 OS=Homo sapiens OX=9606 GN=RAPGEF1 PE=1 SV=3	RAPGEF1	_ASLPDLPLT[Phospho (STY)]PR_	1	Up	0.192703	0.130948	0.178821	1.45797	1.2992	2.04672	0.19098	0.17644	0.0744779	1.07408	1.30725	1.36495	nucleus	K06277	RAPGEF1, GRF2; Rap guanine nucleotide exchange factor 1	map04015 Rap1 signaling pathway; map04510 Focal adhesion; map04722 Neurotrophin signaling pathway; map04910 Insulin signaling pathway	GO:0001885 endothelial cell development; GO:0001932 regulation of protein phosphorylation; GO:0001934 positive regulation of protein phosphorylation; GO:0002064 epithelial cell development; GO:0003158 endothelium development; GO:0006996 organelle organization; GO:0007010 cytoskeleton organization; GO:0007154 cell communication; GO:0007165 signal transduction; GO:0007166 cell surface receptor sign…	GO:0005622 intracellular anatomical structure; GO:0005737 cytoplasm; GO:0005768 endosome; GO:0005769 early endosome; GO:0005829 cytosol; GO:0012505 endomembrane system; GO:0031410 cytoplasmic vesicle; GO:0031982 vesicle; GO:0043226 organelle; GO:0043227 membrane-bounded organelle; GO:0043229 intracellular organelle; GO:0097708 intracellular vesicle;	GO:0005085 guanyl-nucleotide exchange factor activity; GO:0005488 binding; GO:0005515 protein binding; GO:0019899 enzyme binding; GO:0031267 small GTPase binding; GO:0051020 GTPase binding; GO:0098772 molecular function regulator activity;	PF00618	PF00618 RasGEF N-terminal motif		T	KOG3417	Ras1 guanine nucleotide exchange factor
CGIg05529	198	S	0.458359	0.000398106	XP_011443589.2 golgin subfamily A member 6-like protein 22 isoform X1 [Crassostrea gigas]	--	_S[Phospho (STY)]LEDLNQQIQAR_	1	Up	0.713307	0.765705	0.636962	1.67244	1.42094	1.52304	0.66932	0.667144	0.643561	1.007	1.31372	1.19569	nucleus
CGIg05531	248	S	0.566732	0.00478565	XP_034300649.1 pinin [Crassostrea gigas]	--	_RSDS[Phospho (STY)]EVELK_	1	Up	0.79389	0.937696	0.828057	1.29674	1.47515	1.74461	0.735062	0.800244	0.890266	1.37755	1.25859	1.33744	nucleus
CGIg05531	246	S	0.47932	0.0316532	XP_034300649.1 pinin [Crassostrea gigas]	--	_KRS[Phospho (STY)]DSEVELK_	1	Up	0.647733	0.734115	0.679148	0.901059	1.69071	1.70806	0.3362	0.344681	0.355932	1.1004	1.05459	1.08197	nucleus
CGIg05531	116	S	0.465771	0.00074616	XP_034300649.1 pinin [Crassostrea gigas]	--	_HVQS[Phospho (STY)]NPFFLNC[Carbamidomethyl (C)]GVTHPHGR_	1	Up	0.746355	0.792527	0.707344	1.39106	1.63356	1.79798	0.743587	0.773446	0.904159	1.5464	1.57273	1.64831	nucleus
CGIg05531	189	S	0.307297	0.0042636	XP_034300649.1 pinin [Crassostrea gigas]	--	_FAS[Phospho (STY)]VENLLQSSEK_	1	Up	0.470675	0.479204	0.470884	1.19961	1.23844	2.18537	0.690316	0.726895	1.18777	1.01463	1.223	1.53994	nucleus
CGIg05532	207	S	0.298133	0.00423646	Q2YDN4 CC105_BOVIN Coiled-coil domain-containing protein 105 OS=Bos taurus OX=9913 GN=CCDC105 PE=2 SV=1	CCDC105	_SRT[Phospho (STY)]S[Phospho (STY)]MDGRLS[Phospho (STY)]R_	0.999881	Up	0.120427		0.119543	0.501345	0.358606	0.347414	0.129366			0.412549	14.3196	0.455752	cytoplasm
CGIg05539	62	S	0.617284	0.000415309	Q01241 NF70_DORPE 70 kDa neurofilament protein OS=Doryteuthis pealeii OX=1051067 PE=2 SV=1	--	_QS[Phospho (STY)]MGGSSSGGTSYVR_	1	Up	0.90025	1.01041	0.9846	1.57299	1.63304	1.48429	0.808159	0.714767	0.706337	1.33057	1.22152	1.21761	nucleus	K18585	IF; intermediate filament protein if					PF00932	PF00932 Lamin Tail Domain		DY	KOG0977	Nuclear envelope protein lamin, intermediate filament superfamily
CGIg05559	691	S	0.514203	0.0130495	Q80ZI6 LRSM1_MOUSE E3 ubiquitin-protein ligase LRSAM1 OS=Mus musculus OX=10090 GN=Lrsam1 PE=1 SV=1	Lrsam1	_EAEAS[Phospho (STY)]PSHVNMDK_	1	Up	0.507858	0.564423	0.373998	1.09858	0.930673	0.783409	0.605953	0.938263	1.18933	1.34544	1.15279	0.934456	nucleus	K10641	LRSAM1; E3 ubiquitin-protein ligase LRSAM1 [EC:2.3.2.27]		GO:0000209 protein polyubiquitination; GO:0002831 regulation of response to biotic stimulus; GO:0002833 positive regulation of response to biotic stimulus; GO:0006807 nitrogen compound metabolic process; GO:0006810 transport; GO:0006897 endocytosis; GO:0007154 cell communication; GO:0007165 signal transduction; GO:0008104 protein localization; GO:0008152 metabolic process; GO:0009056 catabolic pr…	GO:0005622 intracellular anatomical structure; GO:0005737 cytoplasm; GO:0005829 cytosol; GO:0005886 plasma membrane; GO:0016020 membrane; GO:0071944 cell periphery;	GO:0003824 catalytic activity; GO:0004842 ubiquitin-protein transferase activity; GO:0016740 transferase activity; GO:0019787 ubiquitin-like protein transferase activity; GO:0061630 ubiquitin protein ligase activity; GO:0061659 ubiquitin-like protein ligase activity; GO:0140096 catalytic activity, acting on a protein;	PF00536; PF13920	PF00536 SAM domain (Sterile alpha motif); PF13920 Zinc finger, C3HC4 type (RING finger)		R	KOG0619	FOG: Leucine rich repeat
CGIg05592	536	Y	0.620921	0.00187943	XP_011422692.2 cell adhesion molecule 1-like isoform X1 [Crassostrea gigas]	--	_KPIQIY[Phospho (STY)]DLNGLNNSPYSSEVMMPSV_	1	Up	0.694317	0.746143	0.719747	1.30462	1.10403	1.07038	0.875705	0.761856	1.0062			1.06239	endoplasmic reticulum,mitochondria	K06781	CADM1, IGSF4, NECL2, TSLC1; cell adhesion molecule 1	map04514 Cell adhesion molecules				PF13927	PF13927 Immunoglobulin domain
CGIg05629	413	T	0.208734	0.0116057	Q9Y2X3 NOP58_HUMAN Nucleolar protein 58 OS=Homo sapiens OX=9606 GN=NOP58 PE=1 SV=1	NOP58	_STGSGKT[Phospho (STY)]PVKFEK_	0.999	Up	0.130739	0.434177	0.355207	1.33651	1.34375	1.72785	7.59019e-05	0.0703238		1.58019	1.42943	1.00557	cytoplasm	K14565	NOP58; nucleolar protein 58	map03008 Ribosome biogenesis in eukaryotes	GO:0000154 rRNA modification; GO:0006139 nucleobase-containing compound metabolic process; GO:0006364 rRNA processing; GO:0006396 RNA processing; GO:0006403 RNA localization; GO:0006725 cellular aromatic compound metabolic process; GO:0006807 nitrogen compound metabolic process; GO:0008152 metabolic process; GO:0009451 RNA modification; GO:0009987 cellular process; GO:0010467 gene expression; GO:…	GO:0001650 fibrillar center; GO:0005622 intracellular anatomical structure; GO:0005634 nucleus; GO:0005654 nucleoplasm; GO:0005730 nucleolus; GO:0005732 sno(s)RNA-containing ribonucleoprotein complex; GO:0005737 cytoplasm; GO:0005829 cytosol; GO:0015030 Cajal body; GO:0016604 nuclear body; GO:0030684 preribosome; GO:0031428 box C/D RNP complex; GO:0031974 membrane-enclosed lumen; GO:0031981 nucle…	GO:0001091 RNA polymerase II general transcription initiation factor binding; GO:0001094 TFIID-class transcription factor complex binding; GO:0001098 basal transcription machinery binding; GO:0001099 basal RNA polymerase II transcription machinery binding; GO:0003676 nucleic acid binding; GO:0003723 RNA binding; GO:0005488 binding; GO:0005515 protein binding; GO:0008134 transcription factor bindi…	PF08156	PF08156 NOP5NT (NUC127) domain		AJ	KOG2572	Ribosome biogenesis protein - Nop58p/Nop5p
CGIg05636	54	S	0.501741	0.0349959	Q6XPS3 TPTE2_HUMAN Phosphatidylinositol 3,4,5-trisphosphate 3-phosphatase TPTE2 OS=Homo sapiens OX=9606 GN=TPTE2 PE=1 SV=2	TPTE2	_S[Phospho (STY)]EHPPDLHIR_	1	Up	0.539619	0.707866	0.871248	1.55217	0.983794	1.6868	1.77086	1.19787	0.904935	1.31393	0.894145	1.2669	plasma membrane	K18079	TPTE, TPIP; PTEN homologous phosphatase		GO:0006470 protein dephosphorylation; GO:0006629 lipid metabolic process; GO:0006644 phospholipid metabolic process; GO:0006650 glycerophospholipid metabolic process; GO:0006661 phosphatidylinositol biosynthetic process; GO:0006793 phosphorus metabolic process; GO:0006796 phosphate-containing compound metabolic process; GO:0006807 nitrogen compound metabolic process; GO:0007154 cell communication…	GO:0000139 Golgi membrane; GO:0005622 intracellular anatomical structure; GO:0005737 cytoplasm; GO:0005794 Golgi apparatus; GO:0012505 endomembrane system; GO:0016020 membrane; GO:0031090 organelle membrane; GO:0031984 organelle subcompartment; GO:0043226 organelle; GO:0043227 membrane-bounded organelle; GO:0043229 intracellular organelle; GO:0043231 intracellular membrane-bounded organelle; GO:0…	GO:0003824 catalytic activity; GO:0004721 phosphoprotein phosphatase activity; GO:0004725 protein tyrosine phosphatase activity; GO:0016787 hydrolase activity; GO:0016788 hydrolase activity, acting on ester bonds; GO:0016791 phosphatase activity; GO:0034593 phosphatidylinositol bisphosphate phosphatase activity; GO:0042578 phosphoric ester hydrolase activity; GO:0051800 phosphatidylinositol-3,4-b…	PF00102; PF10409	PF00102 Protein-tyrosine phosphatase; PF10409 C2 domain of PTEN tumour-suppressor protein		TR	KOG2283	Clathrin coat dissociation kinase GAK/PTEN/Auxilin and related tyrosine phosphatases
CGIg05647	853	S	0.426565	8.92707e-05	Q6MGA9 BRD2_RAT Bromodomain-containing protein 2 OS=Rattus norvegicus OX=10116 GN=Brd2 PE=1 SV=1	Brd2	_GAPGSPAMS[Phospho (STY)]PPMR_	1	Up	0.547874	0.604031	0.60861	1.27174	1.46331	1.39215	0.568963	0.623429	0.626455	1.37285	1.4553	1.75533	nucleus	K11721	BRD3; bromodomain-containing protein 3		GO:0000003 reproduction; GO:0000082 G1/S transition of mitotic cell cycle; GO:0000278 mitotic cell cycle; GO:0000280 nuclear division; GO:0000375 RNA splicing, via transesterification reactions; GO:0000377 RNA splicing, via transesterification reactions with bulged adenosine as nucleophile; GO:0000398 mRNA splicing, via spliceosome; GO:0000578 embryonic axis specification; GO:0000902 cell morphog…	GO:0000228 nuclear chromosome; GO:0000307 cyclin-dependent protein kinase holoenzyme complex; GO:0000428 DNA-directed RNA polymerase complex; GO:0000785 chromatin; GO:0000793 condensed chromosome; GO:0000794 condensed nuclear chromosome; GO:0005622 intracellular anatomical structure; GO:0005634 nucleus; GO:0005654 nucleoplasm; GO:0005665 RNA polymerase II, core complex; GO:0005694 chromosome; GO:…	GO:0000993 RNA polymerase II complex binding; GO:0001098 basal transcription machinery binding; GO:0001099 basal RNA polymerase II transcription machinery binding; GO:0002039 p53 binding; GO:0003676 nucleic acid binding; GO:0003677 DNA binding; GO:0003682 chromatin binding; GO:0003712 transcription coregulator activity; GO:0003713 transcription coactivator activity; GO:0003824 catalytic activity;…	PF00439; PF17035	PF00439 Bromodomain; PF17035 Bromodomain extra-terminal - transcription regulation		K	KOG1474	Transcription initiation factor TFIID, subunit BDF1 and related bromodomain proteins
CGIg05647	332	T	0.188267	0.00030443	Q6MGA9 BRD2_RAT Bromodomain-containing protein 2 OS=Rattus norvegicus OX=10116 GN=Brd2 PE=1 SV=1	Brd2	_IINSVST[Phospho (STY)]PVMPGK_	1	Up		0.256144	0.2145	1.26538	1.33422	1.15021		0.265381	0.269849	1.65253	1.31455	1.3262	nucleus	K11721	BRD3; bromodomain-containing protein 3		GO:0000003 reproduction; GO:0000082 G1/S transition of mitotic cell cycle; GO:0000278 mitotic cell cycle; GO:0000280 nuclear division; GO:0000375 RNA splicing, via transesterification reactions; GO:0000377 RNA splicing, via transesterification reactions with bulged adenosine as nucleophile; GO:0000398 mRNA splicing, via spliceosome; GO:0000578 embryonic axis specification; GO:0000902 cell morphog…	GO:0000228 nuclear chromosome; GO:0000307 cyclin-dependent protein kinase holoenzyme complex; GO:0000428 DNA-directed RNA polymerase complex; GO:0000785 chromatin; GO:0000793 condensed chromosome; GO:0000794 condensed nuclear chromosome; GO:0005622 intracellular anatomical structure; GO:0005634 nucleus; GO:0005654 nucleoplasm; GO:0005665 RNA polymerase II, core complex; GO:0005694 chromosome; GO:…	GO:0000993 RNA polymerase II complex binding; GO:0001098 basal transcription machinery binding; GO:0001099 basal RNA polymerase II transcription machinery binding; GO:0002039 p53 binding; GO:0003676 nucleic acid binding; GO:0003677 DNA binding; GO:0003682 chromatin binding; GO:0003712 transcription coregulator activity; GO:0003713 transcription coactivator activity; GO:0003824 catalytic activity;…	PF00439; PF17035	PF00439 Bromodomain; PF17035 Bromodomain extra-terminal - transcription regulation		K	KOG1474	Transcription initiation factor TFIID, subunit BDF1 and related bromodomain proteins
CGIg05647	787	S	0.184912	0.00181737	Q6MGA9 BRD2_RAT Bromodomain-containing protein 2 OS=Rattus norvegicus OX=10116 GN=Brd2 PE=1 SV=1	Brd2	_EESGTVDVVGGS[Phospho (STY)]SR_	0.999862	Up	0.296367	0.243033	0.362592	1.49443	1.75754		0.297935	0.280421	0.352216		1.73576	1.88893	nucleus	K11721	BRD3; bromodomain-containing protein 3		GO:0000003 reproduction; GO:0000082 G1/S transition of mitotic cell cycle; GO:0000278 mitotic cell cycle; GO:0000280 nuclear division; GO:0000375 RNA splicing, via transesterification reactions; GO:0000377 RNA splicing, via transesterification reactions with bulged adenosine as nucleophile; GO:0000398 mRNA splicing, via spliceosome; GO:0000578 embryonic axis specification; GO:0000902 cell morphog…	GO:0000228 nuclear chromosome; GO:0000307 cyclin-dependent protein kinase holoenzyme complex; GO:0000428 DNA-directed RNA polymerase complex; GO:0000785 chromatin; GO:0000793 condensed chromosome; GO:0000794 condensed nuclear chromosome; GO:0005622 intracellular anatomical structure; GO:0005634 nucleus; GO:0005654 nucleoplasm; GO:0005665 RNA polymerase II, core complex; GO:0005694 chromosome; GO:…	GO:0000993 RNA polymerase II complex binding; GO:0001098 basal transcription machinery binding; GO:0001099 basal RNA polymerase II transcription machinery binding; GO:0002039 p53 binding; GO:0003676 nucleic acid binding; GO:0003677 DNA binding; GO:0003682 chromatin binding; GO:0003712 transcription coregulator activity; GO:0003713 transcription coactivator activity; GO:0003824 catalytic activity;…	PF00439; PF17035	PF00439 Bromodomain; PF17035 Bromodomain extra-terminal - transcription regulation		K	KOG1474	Transcription initiation factor TFIID, subunit BDF1 and related bromodomain proteins
CGIg05650	158	S	0.644276	0.00834337	P41383 TBA2_PATVU Tubulin alpha-2/alpha-4 chain OS=Patella vulgata OX=6465 GN=TUB2 PE=2 SV=1	TUB2	_LS[Phospho (STY)]VDYGKK_	0.998885	Up	0.796593	0.700791	0.638952	1.13444	1.20832	0.973106	0.562991	0.856522	0.943628	1.31373	1.2142	1.32444	cytoskeleton	K07374	TUBA; tubulin alpha	map04145 Phagosome; map04210 Apoptosis; map04530 Tight junction; map04540 Gap junction				PF00091; PF03953	PF00091 Tubulin/FtsZ family, GTPase domain; PF03953 Tubulin C-terminal domain	PF00091 Tubulin/FtsZ family, GTPase domain	Z	KOG1376	Alpha tubulin
CGIg05659	167	S	0.574805	0.000555608	XP_034301466.1 uncharacterized protein LOC105331667 isoform X3 [Crassostrea gigas]	--	_ISSRPS[Phospho (STY)]PAR_	1	Up	0.755106	0.799546	0.844609	1.40391	1.27902	1.49112	0.845928	1.03823	0.764985	1.57328	0.968082	1.2167	mitochondria
CGIg05689	544	S	0.0834419	0.000912619	P97432 NBR1_MOUSE Next to BRCA1 gene 1 protein OS=Mus musculus OX=10090 GN=Nbr1 PE=1 SV=1	Nbr1	_LVLEPSKS[Phospho (STY)]EDTLK_	0.999999	Up	0.10452		0.149193	1.47667	1.81015	1.27406		0.186892		1.71177	1.58354	2.01039	cytoplasm	K17987	NBR1; next to BRCA1 gene 1 protein	map04137 Mitophagy - animal	GO:0001932 regulation of protein phosphorylation; GO:0006914 autophagy; GO:0008152 metabolic process; GO:0009056 catabolic process; GO:0009966 regulation of signal transduction; GO:0009987 cellular process; GO:0010646 regulation of cell communication; GO:0016043 cellular component organization; GO:0016236 macroautophagy; GO:0019220 regulation of phosphate metabolic process; GO:0019222 regulation …	GO:0000407 phagophore assembly site; GO:0005622 intracellular anatomical structure; GO:0005634 nucleus; GO:0005654 nucleoplasm; GO:0005737 cytoplasm; GO:0005768 endosome; GO:0005770 late endosome; GO:0005773 vacuole; GO:0005776 autophagosome; GO:0005829 cytosol; GO:0012505 endomembrane system; GO:0016604 nuclear body; GO:0031410 cytoplasmic vesicle; GO:0031974 membrane-enclosed lumen; GO:0031981 …	GO:0005488 binding; GO:0005515 protein binding; GO:0019899 enzyme binding; GO:0019900 kinase binding; GO:0019901 protein kinase binding; GO:0032182 ubiquitin-like protein binding; GO:0043130 ubiquitin binding; GO:0051019 mitogen-activated protein kinase binding;	PF00564; PF00569; PF16158	PF00564 PB1 domain; PF00569 Zinc finger, ZZ type; PF16158 Ig-like domain from next to BRCA1 gene		R	KOG4582	Uncharacterized conserved protein, contains ZZ-type Zn-finger
CGIg05692	394	S	0.0539008	1.11844e-06	Q99615 DNJC7_HUMAN DnaJ homolog subfamily C member 7 OS=Homo sapiens OX=9606 GN=DNAJC7 PE=1 SV=2	DNAJC7	_SAS[Phospho (STY)]MEEIKK_	1	Up	0.115824	0.114546	0.0997354	2.1111	2.12025	1.89298	0.254938	0.106599	0.0713028	1.92533	2.18906	2.15745	cytoplasm	K09527	DNAJC7; DnaJ homolog subfamily C member 7		GO:0006457 protein folding; GO:0006458 'de novo' protein folding; GO:0009987 cellular process; GO:0032781 positive regulation of ATP-dependent activity; GO:0043085 positive regulation of catalytic activity; GO:0043462 regulation of ATP-dependent activity; GO:0044093 positive regulation of molecular function; GO:0048583 regulation of response to stimulus; GO:0050789 regulation of biological proces…	GO:0005622 intracellular anatomical structure; GO:0005634 nucleus; GO:0005654 nucleoplasm; GO:0005737 cytoplasm; GO:0005829 cytosol; GO:0031974 membrane-enclosed lumen; GO:0031981 nuclear lumen; GO:0043226 organelle; GO:0043227 membrane-bounded organelle; GO:0043229 intracellular organelle; GO:0043231 intracellular membrane-bounded organelle; GO:0043233 organelle lumen; GO:0070013 intracellular o…	GO:0001671 ATPase activator activity; GO:0005488 binding; GO:0005515 protein binding; GO:0008047 enzyme activator activity; GO:0030234 enzyme regulator activity; GO:0031072 heat shock protein binding; GO:0051082 unfolded protein binding; GO:0060589 nucleoside-triphosphatase regulator activity; GO:0060590 ATPase regulator activity; GO:0098772 molecular function regulator activity;	PF00226	PF00226 DnaJ domain	PF00226 DnaJ domain	O	KOG0550	Molecular chaperone (DnaJ superfamily)
CGIg05710	125	S	0.435464	0.00910698	Q8CDI6 CD158_MOUSE Coiled-coil domain-containing protein 158 OS=Mus musculus OX=10090 GN=Ccdc158 PE=2 SV=1	Ccdc158	_SSGSMHSGLPSS[Phospho (STY)]PSK_	0.999994	Up	0.568249	0.619146	0.550757	1.79801	1.05738	1.1361	0.513462	0.874671	0.4391	0.740406	0.914964	1.29403	nucleus
CGIg05711	176	S	0.60956	0.00228803	XP_019922198.2 uncharacterized protein LOC109618584 [Crassostrea gigas]	--	_M[Oxidation (M)]C[Carbamidomethyl (C)]KPC[Carbamidomethyl (C)]S[Phospho (STY)]ETDMK_	1	Up	0.960169	0.869324	0.765838	1.48604	1.43099	1.34068	0.934413	1.0424	0.941543	1.10652	1.71888	1.49112	nucleus
CGIg05716	243	S	0.115385	3.08006e-06	XP_034303290.1 uncharacterized protein LOC105336540 isoform X1 [Crassostrea gigas]	--	_GDS[Phospho (STY)]KGDFVQMTVAK_	1	Up	0.248217	0.263413	0.244874	2.42314	2.04911	2.08412	0.261509	0.271987	0.320408	2.35191	2.17824	2.28588	extracellular
CGIg05719	160	T	0.320913	0.00718982	XP_034303285.1 testis-expressed protein 26 isoform X1 [Crassostrea gigas]	--	_PSSSQGFTASHPLEGPIGDTHYTEEFFEKPNRPAT[Phospho (STY)]PIR_	1	Up	0.291449	0.544	0.61939	1.49272	1.59311	1.44761	1.4278	0.592093	0.602492	0.969849	0.489775	0.470015	nucleus
[truncated: 2,252 more rows]

## Sheet: ERK_mediated upregulated
Protein accession	Position	Amino acid	Protein description	Gene name	Modified sequence	Localization probability	SW-12 vs SW-0 Regulation Type	SW_0_1	SW_0_2	SW_0_3	SW_12_1	SW_12_2	SW_12_3	ERK_0_1	ERK_0_2	ERK_0_3	ERK_12_1	ERK_12_2	ERK_12_3	SW_0/SW_12 Ratio	SW_0/SW_12 P value	ERK_12/SW_12 Ratio	ERK_12/SW_12 P value	ERK_0/SW_0 Ratio	ERK_0/SW_0 P value	ERK_12/ERK_0 Ratio	ERK_12/ERK_0 P value	Subcellular localization	KEGG KO No.	KEGG Gene	KEGG pathway	Biological Process	Cellular Component	Molecular Function	Pfam ID	Domain description	Site Domain	KOG category	KOG NO.	KOG description
[truncated: 838 more rows]

## Sheet: Downregulated under heat stress
Protein accession	Position	Amino acid	SW_0/SW_12 Ratio	SW_0/SW_12 P value	Protein description	Gene name	Modified sequence	Localization probability	SW-12 vs SW-0 Regulation Type	SW_0_1	SW_0_2	SW_0_3	SW_12_1	SW_12_2	SW_12_3	ERK_0_1	ERK_0_2	ERK_0_3	ERK_12_1	ERK_12_2	ERK_12_3	Subcellular localization	KEGG KO No.	KEGG Gene	KEGG pathway	Biological Process	Cellular Component	Molecular Function	Pfam ID	Domain description	Site Domain	KOG category	KOG NO.	KOG description
[truncated: 2,497 more rows]

## Sheet: ERK-mediated downregulated
Protein accession	Position	Amino acid	Protein description	Gene name	Modified sequence	Localization probability	SW-12 vs SW-0 Regulation Type	SW_0_1	SW_0_2	SW_0_3	SW_12_1	SW_12_2	SW_12_3	ERK_0_1	ERK_0_2	ERK_0_3	ERK_12_1	ERK_12_2	ERK_12_3	SW_0/SW_12 Ratio	SW_0/SW_12 P value	ERK_12/SW_12 Ratio	ERK_12/SW_12 P value	ERK_0/SW_0 Ratio	ERK_0/SW_0 P value	ERK_12/ERK_0 Ratio	ERK_12/ERK_0 P value	Subcellular localization	KEGG KO No.	KEGG Gene	KEGG pathway	Biological Process	Cellular Component	Molecular Function	Pfam ID	Domain description	Site Domain	KOG category	KOG NO.	KOG description
[truncated: 445 more rows]
