# Supplementary material for: A Naturally Synonymous Mutation in SHOC2 Modulates ERK-PFK Cascade to Mediate Thermotolerance Divergence Among Oysters
Source: Research Square preprint supplement (doi:10.21203/rs.3.rs-7424750/v1), 2025-10-07
Supplement: Supplementary file 5 [file a311ad968f8a237dada04015.xlsx]

## Sheet: Sheet1
Function	Protein accession	Position	Amino acid	Protein description	Abbreviation	SW_0/SW_12 Ratio	SW_0/SW_12 P value	ERK_12/SW_12 Ratio	ERK_12/SW_12 P value	ERK_0/SW_0 Ratio	ERK_0/SW_0 P value
Energy metabolism	CGIg25124	262	T	Long-chain-fatty-acid--CoA ligase 4	ACSL4	0.16354	0.000146335	0.549658	0.0124637	0.597931	0.0167569
	CGIg11007	2327	S	Protein ELYS	AHCTF1	0.174445	4.40875e-05	0.28664	0.000284323	5.37648	0.000113363
	CGIg08001	1045	S	Probable phosphorylase b kinase regulatory subunit alpha	CG7766	0.471929	0.00372809	0.833032	0.175946	0.532525	0.00298951
	CGIg22984	134	S	Diacylglycerol kinase beta	DGKB	0.291771	0.0042354	0.981499	0.95537	0.519226	0.178963
	CGIg24100	357	S	Diacylglycerol kinase theta	DGKQ	0.0759387	0.0151245	0.723305	0.595457	1.0017	0.828144
	CGIg24733	8/18	S/S	Putative glycerol kinase 5	GK5	0.41/2.27	1.62E-02/1.58E-02	1.28/3.21	7.53E-02/6.82E-02	0.73/1.79	3.62E-01/8.56E-02
	CGIg24369	653	S	Glycogen [starch] synthase	GLYS	2.33294	0.000747307	0.896009	0.296134	1.62044	0.000263666
	CGIg05432	714	S	Hormone-sensitive lipase	LIPE	2.96671	0.0103046	3.8005	0.0534912	1.60669	0.0193804
	CGIg24165	630	S	Phosphatidate phosphatase LPIN2	LPIN2	0.106482	0.018562	0.219396	0.0236511	1.35634	0.507201
	CGIg24415	793	T	ATP-dependent 6-phosphofructokinase	PFK	0.57268	0.00170623	0	0	0.639368	0.142616
	CGIg26217	538/853/843	S/S/T	Phospholipase A2 Group IVA	PLA2G4A	0.49/0.58/0.26	7.10E-04/1.65E-02/1.14E-03	1.10/0.96/0.06	5.92E-02/6.53E-01/2.68E-02	0.68/0.69/0.32	3.78E-01/1.46E-01/2.69E-01
	CGIg16230	497	S	1-phosphatidylinositol 4,5-bisphosphate phosphodiesterase classes I and II	PLC21C	0.218438	0.000253564	0.954649	0.779141	0.602811	0
	CGIg16293	93	S	Patatin-like phospholipase domain-containing protein 7	PNPLA7	0.202349	0.0338194	0.514099	0.151853	1.70219	0.197505
	CGIg28179	49	S	5'-AMP-activated protein kinase subunit gamma-2	PRKAG2	0.65277	0.0263858	1.17	0.144069	0.634612	0.0220965
	CGIg28265	499	S	Sterol regulatory element-binding protein cleavage-activating protein	SCAP	0.046632	0.013462	0.992866	0.81277	0	0
	CGIg05501	534/1144	S/S	TBC1 domain family member 1	TBC1D1	0.07/0.43	2.62E-05/1.32E-02	1.08/0.63	3.24E-01/1.46E-02	0.00/0.97	0.00/8.60E-01
	CGIg03010	436/218	S/S	Forkhead box protein O	FOXO	0.48/9.01	9.04E-04/1.21E-02	1.17/3.01	1.47E-01/6.61E-02	0.60/1.08	2.21E-03/5.24E-01
	CGIg18670	352	T	Forkhead box protein K1	FOXK1	0.202256	0.000959125	1.13665	0.348284	0	0
	CGIg23209	-	-	cytochrome c oxidase subunit NDUFA4	NDUFA4	0.636399	0.000492862	0.700922	0.00202268	1.37298	0.00018282
	CGIg27114	-	-	Bifunctional coenzyme A synthase	COASY	0.314101	0.00410399	0.74262	0.00726717	2.61026	0.00826631
	CGIg08388	-	-	L-ascorbate oxidase	AAO	3.04952	0.000437687	0.894801	0.415029	0.849753	0.00192902
	CGIg24312	-	-	Adenosine deaminase	ADA	2.12167	1.05224e-05	2.18998	5.64551e-06	1.34784	0.00025102
	CGIg15795	-	-	Trans-L-3-hydroxyproline dehydratase	L3HYPDH	1.73079	2.70303e-05	0.815322	0.00605771	0.430903	0.00235269
	CGIg22754	-	-	Xanthine dehydrogenase/oxidase	XDH	0.47749	0.000171014	0.527468	0.000263939	2.70125	5.10376e-06
	CGIg03683	-	-	Glutathione S-transferase 3	GSTA3	0.54529	1.52132e-05	1.1834	0.0223664	0.688105	0.0002884
	CGIg21722	-	-	Glutathione hydrolase 1 proenzyme	GGT1	1.67933	0.0221899	0.904458	0.591636	0.833902	0.268265
	CGIg18736	-	-	Geranylgeranyl pyrophosphate synthase	GGPS1	0.606542	0.0088189	0.581903	0.21956	1.03103	0.845081
	CGIg08971	-	-	Fatty acid-binding protein	Fabp2	0.552209	0.000513369	0.740341	0.00127283	0.885475	0.110291
	CGIg15432	-	-	Very long-chain acyl-CoA synthetase	SLC27A2	1.63103	0.0158239	1.29038	0.183552	0.920372	0.46824
	CGIg07945	-	-	Acyl-CoA 6-desaturase	FADS2	1.72042	0.0077511	1.00465	0.897379	0.981788	0.83789
Signal transduction	CGIg05960	557	T	Adenylate cyclase type 9	ADCY9	0.522651	0.00640161	0.680474	0.457037	0.93372	0.71696
	CGIg15293	664	S	A-kinase anchor protein 13	AKAP13	0.289155	0.000320983	0.72202	0.0241688	1.55046	0.0123672
	CGIg06785	1102	S	Ankyrin repeat and LEM domain-containing protein 2	ANKLE2	0.592457	0.00104524	0.984348	0.856505	0.728487	0.0044127
	CGIg27374	226/530	S/S	Rho GTPase-activating protein 12	ARHGAP12	0.60/0.12	2.34E-02/7.67E-04	0.75/1.08	2.24E-01/2.86E-01	1.47/0.59	1.75E-01/2.46E-01
	CGIg06673	789/1372	S/T	Rho guanine nucleotide exchange factor 11	ARHGEF11	2.60/0.06	2.27E-02/9.44E-05	1.51/0.71	1.63E-01/1.85E-01	0.88/0.73	1.84E-01/2.98E-01
	CGIg26266	536	T	B-cell linker protein	BLNK	0.103434	0.00150316	0.121272	0.0193775	0.854773	0.472155
	CGIg20403	335	T	Calcium/calmodulin-dependent protein kinase type II subunit delta	CAMK2D	0.395573	0.03446	0.743598	0.381997	0.653697	0.356932
	CGIg18740	22	S	Protein chibby homolog 1	CBY1	0.127414	0.0232888	0.714333	0.00777313	1.52927	0.43635
	CGIg22446	121	S	Atrial natriuretic peptide-converting enzyme	CORIN	0.113824	0.000218398	0.0128716	0	1.86249	0.0143126
	CGIg08553	672	S	Serine/threonine-protein kinase DCLK1	DCLK1	0.226475	0.00264813	0.348548	0.157578	1.2085	0.0842739
	CGIg21474	1238	T	Dedicator of cytokinesis protein 7	DOCK7	0.370231	0.00856643	0.695423	0.0350484	1.32587	0.689419
	CGIg19194	407	Y	Tyrosine-protein kinase Fyn	FYN	0.148178	8.04479e-05	0.843678	0.282873	0.35143	0.0045632
	CGIg05464	775	S	GTPase-activating protein and VPS9 domain-containing protein 1	GAPVD1	0.0256257	0.0187221	0.689968	0.498738	20.4974	0.47367
	CGIg05740	470	S	Golgi-associated plant pathogenesis-related protein 1	GLIPR2	0.0436654	1.2067e-05	0.435943	0.000136874	0.872304	0.363036
	CGIg11017	2832	S	Metabotropic glutamate receptor 3	GRM3	0.368856	0.00031878	0.969939	0.738048	0.744846	0.180092
	CGIg06222	743	S	Mitogen-activated protein kinase kinase kinase 13-A	MAP3K13	0.425257	0.0349625	0.533219	0.0283951	1.93833	0.000872549
	CGIg04920	512	S	Mitogen-activated protein kinase kinase kinase 7	MAP3K7	0.593404	0.00633295	0.783277	0.0907142	0.643169	0.0052549
	CGIg08938	189	Y	Mitogen-activated protein kinase 1	MAPK1	0.489455	0.000601097	0.670334	0.00478743	0.572871	0.00197258
	CGIg18216	763	T	Mitogen-activated protein kinase-binding protein 1	MAPKBP1	0.181377	3.73134e-05	0.714016	0.04397	1.5354	0.016916
	CGIg16769	509	S	Serine/threonine-protein kinase MARK1	MARK1	0.0439174	0.000144754	0.816446	0.388885	0.68058	0
	CGIg12214	16/167	T/S	MTOR-associated protein MEAK7	MEAK7	0.54/0.53	1.12E-02/3.98E-02	0.44/0.67	2.90E-02/2.37E-02	1.20/0.78	2.06E-01/5.24E-01
	CGIg05803	374	S	Serine/threonine-protein kinase Nek1	NEK1	0.399195	0.0342658	0.562471	0.271817	2.37666	0.0124744
	CGIg18981	1443	T	Nephrocystin-4	NPHP4	0.4064	0.000931534	0.538387	0.00659143	1.21563	0.0509928
	CGIg25435	9	S	PABIR family member 2	PABIR2	0.662443	0.0218068	0.662643	0.00163735	0.79506	0.174407
	CGIg04669	793/671/578/681	S/S/S/S	Phospholipase D1	PLD1	0.22/0.44/0.29/0.26	3.65E-04/8.21E-03/1.38E-03/4.50E-04	0.65/0.66/0.68/0.75	3.54E-04/4.65E-02/2.24E-02/1.48E-02	1.95/1.37/1.00/1.73	3.46E-02/3.60E-01/9.49E-01/5.83E-02
	CGIg02818	82/817	S/S	Protein phosphatase 1 regulatory subunit 12A	PPP1R12A	0.31/0.21	4.84E-04/3.83E-04	0.42/0.54	6.34E-04/6.99E-04	0.43/1.29	8.71E-03/1.32E-01
	CGIg13683	753	T	Tyrosine-protein phosphatase non-receptor type 12	PTPN12	0.356211	0.00355774	0.856725	0.4554	0.639405	0.113635
	CGIg10595	11	S	Ran-specific GTPase-activating protein	RANBP1	0.592796	0.0197637	0.595954	0.136376	0.967859	0.746177
	CGIg09214	526	S	Rap1 GTPase-activating protein 1	RAP1GAP	0.478227	0.00193585	1.306	0.383865	0.38385	0.00611757
	CGIg05012	793	S	RalBP1-associated Eps domain-containing protein 1	REPS1	0.485697	0.0326715	0.575126	0.0535079	1.1607	0.310155
	CGIg04674	355/359	T/S	Ribosomal protein S6 kinase alpha-3	RPS6KA3	0.26/0.30	9.48E-03/3.78E-05	0.79/0.72	1.00E-01/4.16E-03	0.39/0.72	1.06E-01/1.08E-02
	CGIg16492	1160	S	Son of sevenless homolog 2	SOS2	0.123163	0.000824576	1.30899	0.17795	0.749734	0.303509
	CGIg15079	421	S	SLIT-ROBO Rho GTPase-activating protein 1	SRGAP1	0.369722	0.000126673	0.74233	0.000944923	1.16545	0.341516
	CGIg03739	631	S	TGF-beta-activated kinase 1 and MAP3K7-binding protein 2	TAB2	0.223575	0.00501477	1.05843	0	0.737737	0.215754
	CGIg06783	173	S	Tyrosine-protein kinase Tec	TEC	0.0666762	9.02927e-05	0.715831	0.0333575	1.02267	0.985259
	CGIg25049	1433	T	Transient receptor potential cation channel subfamily M member 3	TRPM3	0.395952	0.012384	0.441046	0.0145766	1.08998	0.43244
	CGIg13815	546	S	Serine/threonine-protein kinase B-raf	BRAF	1.94211	0.0154007	1.2725	0.0949939	1.94499	0.674798
	CGIg06376	250	S	Mitogen-activated protein kinase kinase kinase 2	MAP3K2	2.14529	0.0147588	0.879582	0.509816	1.83837	0.218547
	CGIg27854	928	T	Angiopoietin-1 receptor	TEK	5.08166	0.00122908	3.68735	0	0	0
	CGIg05512	322	S	Rap guanine nucleotide exchange factor 1	RAPGEF1	4.89296	0.00407817	2.81274	0.103065	0.758766	0.574566
	CGIg26524	1615	S	Regulator of G-protein signaling 12	RGS12	6.24384	0.000233121	0.984547	0.883795	1.50902	0.0431398
	CGIg19568	1199	S	Receptor-type guanylate cyclase Gyc76C	GYC76C	1.58847	0.00816176	0.908284	0.507863	1.7135	0.0355452
	CGIg09408	519	S	GATOR complex protein Iml1	IML1	2.77963	0.0191163	0	0	1.97138	0.0085191
	CGIg18016	1079	T	Coiled-coil domain-containing protein 171	CCDC171	1.65148	0.00239265	1.37912	0.614627	1.73623	0.0555054
	CGIg20053	-	-	Cytochrome c oxidase subunit 12, mitochondrial	COX12	0.44059	0.000106935	0.544617	0.000984283	1.97523	0.000131486
	CGIg09623	-	-	NADH dehydrogenase [ubiquinone] 1 alpha subcomplex subunit 6	NDUFA6	0.471323	5.34986e-06	0.53711	6.6652e-06	1.2519	0.000727735
	CGIg18401	-	-	ATP synthase-coupling factor 6, mitochondrial	ATPSYNCF6	0.430032	3.88954e-07	0.490053	0.00031927	1.99872	1.61208e-07
	CGIg18935	-	-	Growth factor receptor-bound protein 2	GRB2	0.548115	0.000320136	0.496015	0.000288201	0.788239	0.0109902
	CGIg20263	-	-	Calmodulin	CALM1	0.305912	0.0226556	0.723807	0.0423769	3.29469	0.0229815
	CGIg21989	-	-	Hepatocyte growth factor receptor	HGF	0.512041	0.00399779	0.522088	0.0607464	1.77767	0.0212535
	CGIg23209	-	-	Angiopoietin-1 receptor	TEK	1.64707	0.00112145	1.38775	0.00443903	0.840311	0.0146762
Cell survival and apoptosis	CGIg02991	153	S	E3 ubiquitin-protein ligase XIAP	XIAP	0.260221	0.00312189	0.922237	0.631817	0.344925	0.156272
	CGIg26810	192	S	Ubiquitin-like-conjugating enzyme ATG3	ATG3	0.44584	0.000155322	0.822211	7.85906e-05	0.553156	0.0640187
	CGIg05305	135	S	Caspase-3	CASP3	0.532948	0.0371276	0.832727	0.205187	0.408291	0.0459822
	CGIg05212	220	S	Caspase-7	CASP7	0.610782	0.00347517	0.686893	0.0221986	1.00084	0.95826
	CGIg13356	111/114/532	S/S/S	Forkhead box protein P1	FOXP1	0.40/0.47/0.27	2.64E-03/1.13E-02/7.50E-03	0.56/0.73/0.64	7.06E-03/1.69E-01/7.78E-02	1.40/1.20/0.82	1.82E-01/4.78E-01/6.95E-01
	CGIg12379	515	S	Serine/threonine-protein kinase Chk2	CHEK2	0.465624	0.000966289	0.746059	0.0505515	1.02636	0.756032
	CGIg10448	370	S	Protein DDI1 homolog 2	DDI2	0.442617	0.0151729	0.521165	0.00645054	0.354789	0.0354694
	CGIg14303	558/570	S/S	Dynamin-1-like protein	DNM1L	0.38/0.05	2.72E-02/1.20E-03	0.37/0.47	9.93E-03/1.27E-02	0.85/0.35	6.60E-01/7.86E-02
	CGIg20315	1104/1724	S/S	Epidermal growth factor receptor substrate 15	EPS15	0.33/0.61	1.59E-03/1.55E-03	1.10/0.35	4.62E-01/1.02E-05	0.37/0.92	7.06E-02/2.87E-01
	CGIg14728	528	S	Constitutive coactivator of PPAR-gamma-like protein 1 homolog	FAM120A	0.165011	0.0276448	0.573799	0.245818	2.91431	0.401628
	CGIg13320	43	S	FYVE, RhoGEF and PH domain-containing protein 6	FGD6	0.325191	3.30382e-05	0.788509	0.0050057	0.393485	0.000382098
	CGIg11474	1912	S	Probable E3 ubiquitin-protein ligase HECTD4	HECTD4	0.583974	0.000252503	1.34248	8.23443e-05	0.653999	0.137722
	CGIg04455	314	S	Apoptosis inhibitor IAP	IAP	0.185936	1.19322e-05	0.897782	0.505294	0.732583	0.0566671
	CGIg21065	300	S	Microtubule-associated serine/threonine-protein kinase 2	MAST2	0.511302	0.00191152	1.20691	0.057209	0.520601	0.00720552
	CGIg06114	236	S	Copper-transporting ATPase 1	ATP7A	0.469333	0.00507742	0.618648	0.0105128	1.04734	0.588687
	CGIg19508	1044	S	Mediator of DNA damage checkpoint protein 1	MDC1	0.357837	0.000239964	0.860109	0.0486793	0.59443	0
	CGIg10895	326	T	Mitofusin-2	MFN2	0.219381	0.000918517	0.747677	0.155323	0.83196	0.208438
	CGIg23113	315	S	DNA mismatch repair protein Msh6	MSH6	0.561889	0.00307946	0.603877	0.0557889	1.44808	0.0520486
	CGIg24353	264	S	Myeloid differentiation primary response protein MyD88	MYD88	0.559102	0.000294912	0.831294	0.24575	0.4368	0
	CGIg07419	1535	S	NEDD4-binding protein 2	N4BP2	0.359767	0.00271447	0.668227	0.0316627	0.883042	0.495605
	CGIg17117	412/305/299	S/S/S	E3 ubiquitin-protein ligase NEDD4-like	NEDD4L	0.45/0.16/0.10	3.88E-02/4.87E-02/9.57E-06	0.97/1.66/0.96	8.30E-01/3.93E-01/6.51E-01	0.47/0.50/0.70	1.54E-01/3.94E-01/3.87E-01
	CGIg02598	53	S	Phosducin-like protein 3	PDCL3	0.293026	0.0168727	1.70442	0.0372822	0.568428	0.345313
	CGIg16378	588	S	Ras GTPase-activating protein 1	RASA1	0.600344	0.0413273	0.673696	0.0395696	0.779002	0.201
	CGIg12632	440	S	Ras association domain-containing protein 5	RASSF5	0.266914	0.0239055	0.578966	0.254339	1.28312	0.176146
	CGIg20025	673	S	E3 ubiquitin-protein ligase RBBP6	RBBP6	0.639602	0.0103439	0.932704	0.497102	0.704364	0.0230879
	CGIg12209	81	S	RanBP-type and C3HC4-type zinc finger-containing protein 1	RBCK1	0.14008	8.57128e-05	0.731519	0.127493	0.628133	0
	CGIg18013	16	Y	E3 ubiquitin-protein ligase RNF115	RNF115	0.205381	0.000315653	0.443183	0.152953	0.622067	0.0858258
	CGIg21900	209	S	Glycine-rich RNA-binding protein RZ1B	RZ1B	0.403582	1.29971e-05	0.748035	0.000986064	1.42945	0.00220712
	CGIg21865	173	S	Zinc transporter 1	SLC30A1	0.257401	0.000157952	0.677037	0.100713	1.05286	0.776992
	CGIg26275	598	T	Sodium/hydrogen exchanger 1	SLC9A1	0.336189	0.011678	0.735791	0.351762	1.35381	0.264664
	CGIg19376	54	S	Sorting nexin-30	SNX30	0.319945	0.00931113	0.958189	0.703979	0.642154	0.227745
	CGIg05992	255	S	Mitochondria-eating protein	SPATA18	0.231311	0.000141653	0.57154	0.419567	1.53028	0.433431
	CGIg22952	46	S	Serine/threonine-protein kinase 3	STK3	0.0175517	2.52359e-05	0.623444	0.00791435	1.74764	0.0305998
	CGIg17281	651	S	TP53-binding protein 1	TP53BP1	0.119128	0.00103475	1.35819	0.772017	0.586722	0
	CGIg20744	82	S	E3 ubiquitin-protein ligase TRAF7	TRAF7	0.254914	7.06284e-05	0.73102	0.21368	0.693207	0
	CGIg26221	506/567	S/T	Tripartite motif-containing protein 45	TRIM45	0.16/0.44	3.05E-04/1.10E-04	0.50/0.70	4.54E-03/0.00	1.13/1.36	8.34E-01/0.00
	CGIg02607	51	T	Transient receptor potential cation channel subfamily A member 1 homolog	TRPA-1	0.543297	0.000759644	1.10997	0.169517	0.441271	0.00782344
	CGIg12055	277	S	Vacuolar protein sorting-associated protein 33A	VPS33A	0.461465	0.00842345	0.857987	0.524543	0.732149	0.306752
	CGIg19925	610	T	Wings apart-like protein homolog	WAPL	0.0137886	2.28996e-05	0.812982	0.0031034	0.620297	0.142299
	CGIg19935	3180	S	WD repeat and FYVE domain-containing protein 3	WDFY3	0.572823	0.000329964	0.730618	0.00170116	1.71968	0.000286911
	CGIg15611	438	S	XK-related protein 6	XKR6	0.366561	3.81283e-05	0.649739	0.000978704	1.04513	0.110028
	CGIg10374	265	T	DNA repair protein XRCC1	XRCC1	0.328249	0.000598209	1.15892	0.27582	0.668903	0.0125833
	CGIg11968	141	T	DNA replication licensing factor mcm4-B	MCM4-B	5.5078	0.00118931	2.46075	0.0636584	1.2365	0.641263
	CGIg25944	478	S	H/ACA ribonucleoprotein complex subunit DKC1	DKC1	1.94904	0.00550645	0.657526	0.0259105	2.38524	0.000193443
	CGIg17038	606	S	RNA-binding protein 25	RBM25	2.373	0.000140325	1.33526	0.238726	1.66125	0.000229773
	CGIg19196	455	S	Protein pangolin, isoforms A/H/I/S	PAN	2.18885	0.00582449	0.913512	0.447789	1.54081	0.0318154
	CGIg09557	-	-	Caspase-9	CASP9	0.228208	0.00155993	0.500967	0.0140562	3.79561	0.00325352
	CGIg10412	-	-	Caspase-3	CASP3	0.533201	0.000292559	0.24679	0.000353156	0.928426	0.299857
	CGIg18945	-	-	Macrophage-expressed gene 1 protein	MPEG1	1.72517	2.74859e-05	1.33811	0.00230664	0.882471	0.00384594
	CGIg23886	-	-	Cathepsin F	CTSF	1.64807	0.00301768	1.15136	0.141381	0.993482	0.903161
	CGIg07841	-	-	Caspase-2	CASP2	0.025512	0.000174748	0.0250129	1.26189e-06	0.867726	0.792586
Cytoskeletal organization	CGIg23311	1060	S	Adhesion G protein-coupled receptor L3	ADGRL3	0.439548	0.0306774	1.14235	0.544482	0.381759	0.0341102
	CGIg05144	2141	S	Afadin	AFDN	0.539351	0.00971733	0.649983	0.0309911	1.31293	0.0159616
	CGIg19869	202	S	Rho GTPase-activating protein 45	ARHGAP45	0.53351	0.00275145	0.732241	0.306741	1.02292	0.676788
	CGIg23319	88	T	Adenylyl cyclase-associated protein 1	CAP1	0.351738	7.42748e-05	0.470621	0	0.9406	0.731408
	CGIg17831	32	T	Coiled-coil domain-containing protein 170	CCDC170	0.409669	0.0451642	0.719429	0.350728	1.36654	0.173048
	CGIg14178	1013	S	Coiled-coil domain-containing protein 66	CCDC66	0.139971	0.00081089	0.619289	0.107361	0.670757	0.0156109
	CGIg15203	588	S	Centrosomal protein of 120 kDa	CEP120	0.419383	0.00138047	0.449577	0	0.852416	0.0707318
	CGIg04884	189	S	Src substrate cortactin	CTTN	0.450458	0.0192303	1.45283	0.120034	0.746397	0.169928
	CGIg26384	392/399/406438	S/S/S/S	Drebrin-like protein	DBNL	0.55/0.48/0.47/0.54/0.55	2.23E-03/1.51E-05/2.91E-05/2.13E-02	0.71/0.57/0.56/0.62	7.13E-02/2.32E-04/2.00E-04/3.45E-03	1.24/1.42/1.46/0.81	4.61E-02/2.79E-04/5.01E-04/4.22E-01
	CGIg22045	277/590	T/S	EF-hand domain-containing protein 1	EFHC1	0.55/0.48	1.27E-02/1.78E-05	0.72/0.74	6.58E-02/2.64E-01	0.99/1.30	8.93E-01/2.39E-03
	CGIg11698	783	S	FH1/FH2 domain-containing protein 3	FHOD3	0.520472	0.000438481	1.1597	0.127352	0.593479	0.0367849
	CGIg15827	682	T	Microtubule-associated protein futsch	FUTSCH	0.445819	0.000174881	0.568848	0.036304	0.90522	0.0490317
	CGIg12739	237/243	S/S	Gelsolin-like protein 2	GELSOLIN	0.06/0.05	2.15E-05/5.64E-05	0.61/0.71	6.16E-04/5.14E-02	0.47/1.18	0.00/2.33E-01
	CGIg22944	340	S	Inactive hydroxysteroid dehydrogenase-like protein 1	HSDL1	0.378839	0.0478875	0.743771	0.0525556	0.589004	0.404071
	CGIg15818	1572	S	Ras GTPase-activating-like protein IQGAP1	IQGAP1	0.255071	0.000586803	1.10316	0.4269	0.520568	0
	CGIg15031	653	S	Kinesin-like protein KIN-14E	KIN14E	0.0153633	2.50398e-06	1.47541	0.0124467	0.66242	0
	CGIg18843	2245	T	Unconventional myosin-XV	MYO15A	0.603598	0.00129747	1.12133	0.101632	0.721245	0.00176962
	CGIg16545	1126	S	Unconventional myosin-Ixa	MYO9A	0.322395	0.0103252	0.426172	0.0222518	2.38488	0.0135296
	CGIg18378	1882	S	Myosin-I heavy chain	MYOI	0.555945	0.00341618	1.06198	0.446838	0.690915	0.02859
	CGIg06686	533	S	Outer dynein arm-docking complex subunit 4	ODAD4	0.229355	0.0133071	0.481448	0.158874	1.5621	0.109674
	CGIg19381	534	S	Phosphatase and actin regulator 2	PHACTR2	0.528913	0.0276029	0.842702	0.506779	0.510485	0.00302709
	CGIg22730	529/1147	S/S	Pleckstrin homology domain-containing family A member 7	PLEKHA7	0.47/0.11	1.25E-04/6.09E-05	0.68/0.68	4.26E-02/9.97E-03	1.16/1.20	6.89E-02/1.88E-01
	CGIg28183	746	S	Pre-mRNA-processing factor 40 homolog A	PRPF40A	0.554159	0.00149852	0.721911	0.024442	1.54952	0.00297194
	CGIg06328	692/1253	S/S	Protein Shroom3	SHROOM3	0.45/0.55	9.32E-04/6.87E-05	0.71/0.72	2.39E-02/2.07E-03	1.19/0.78	3.25E-01/3.57E-04
	CGIg23580	309	S	Na(+)/H(+) exchange regulatory cofactor NHE-RF1	SLC9A3R1	0.0438332	6.49453e-06	0.71852	0.043843	0.896245	0.121245
	CGIg25331	1072	S	Structural maintenance of chromosomes protein 3	SMC3	0.655847	0.0359593	0.487248	0.121061	1.35814	0.0292071
	CGIg08693	1089	S	Supervillin	SVIL	0.486595	0.000907266	0.931001	0.596671	0.680583	0.00332207
	CGIg01668	1655/2391	S/S	Tight junction protein ZO-1	TJP1	2.47/0.45	1.47E-05/6.90E-04	1.84/0.67	1.32E-04/2.15E-03	0.82/1.15	7.44E-03/3.12E-01
	CGIg00119	2155	S	Talin-2	TLN2	0.515837	0.0222165	0.713242	0.0902173	1.07868	0.57569
	CGIg05965	309	S	LIM domain only protein 7	LMO7	35.4818	0.000384575	3.56135	0.0893312	1.04916	0.68861
	CGIg25588	667	S	Disks large homolog 1	DLG1	3.94113	0.00281356	1.20931	0.265394	1.53868	0.0437506
	CGIg10412	-	-	Hemicentin-1	HMCN1	2.02846	5.2006e-05	1.7553	6.63862e-05	0.621205	0.00205711
	CGIg18945	-	-	Collagen alpha-5(VI) chain	COL6A5	1.79592	0.00109593	1.28788	0.0620511	0.44278	0.000419167
	CGIg23886	-	-	Myosin regulatory light polypeptide 9	MYL9	0.570326	5.16869e-07	0.425442	3.00498e-05	1.12391	0.00053007
	CGIg11277	-	-	Dynein axonemal light chain 1	DNAL1	0.607489	0.00177777	0.583163	0.00319153	0.722295	0.0280457
	CGIg11280	-	-	Spermatogenesis-associated protein 17	SPATA17	0.595295	1.17851e-05	0.740025	6.62325e-06	1.29482	0.00187424
Transcriptional and translational regulation	CGIg09620	205/215	T/T	Pre-mRNA-splicing factor ATP-dependent RNA helicase PRP16	DHX38	0.17/0.16	2.99E-05/4.21E-02	0.90/1.07	1.17E-01/9.89E-01	0.59/0.57	4.07E-02/5.76E-01
	CGIg15037	452	S	Transcription initiation factor TFIID subunit 3	TAF3	0.569054	0.0333043	1.11315	0.319789	0.569673	0.0937942
	CGIg06286	41	S	Calcyclin-binding protein	CACYBP	0.235263	0.0496978	1.46489	0.958394	0.586828	0.0989897
	CGIg25455	994	S	Eukaryotic translation initiation factor 3 subunit A	EIF3A	0.169657	0.00400637	1.6772	0.00117726	0.605336	0.271505
	CGIg18647	21	S	Splicing factor U2AF 50 kDa subunit	U2AF50	0.418545	0.00496039	1.46305	0.0200261	0.613097	0
	CGIg24049	20	S	Heat shock protein beta-6	HSPB6	0.103845	2.21387e-06	1.23948	0.0415394	0.613437	0.00191137
	CGIg25818	96/99	Y/S	TAR DNA-binding protein 43	TARDBP	0.28/0.40	1.02E-03/2.71E-03	0.82/1.23	5.06E-01/5.87E-02	0.73/0.67	9.75E-03/1.04E-01
	CGIg09563	50	S	Eukaryotic translation initiation factor 5A-1	EIF5A	0.193628	0.000549486	1.15487	0.109259	0.707238	0.191625
	CGIg21318	764	S	WD repeat-containing protein 36	WDR36	0.208217	2.63716e-05	0.842883	0.181614	0.716698	0.362752
	CGIg22488	221	S	Splicing factor 3A subunit 2	SF3A2	0.303496	0.00046381	1.32395	0.146372	0.718697	0
	CGIg18213	106	S	Small nuclear ribonucleoprotein Sm D2	SNRPD2	0.151658	0.000102879	1.06991	0.404111	0.745327	0.0850837
	CGIg03046	7	T	Charged multivesicular body protein 2b	CHMP2B	0.0689335	0.00075461	0.396892	0.00310927	1.27489	0.622258
	CGIg12473	90	S	Transcription elongation factor SPT6	SUPT6H	0.214984	0.000117684	0.416636	0.0386092	1.68402	0.163321
	CGIg03045	606	S	Translocation protein SEC63 homolog	SEC63	0.236677	0.0078033	0.552404	0.00654545	1.41733	0.252385
	CGIg10461	1770	S	5'-3' exoribonuclease 1	XRN1	0.329879	0.00174645	0.557174	0.107243	0.841979	0.452967
	CGIg19269	66/620	S/S	HBS1-like protein	HBS1L	0.25/0.20	6.81E-05/2.67E-04	0.58/0.66	1.81E-02/4.08E-02	2.30/3.42	5.02E-01/7.25E-04
	CGIg23654	64	S	Hsp70-binding protein 1	HSPBP1	0.530888	0.0106872	0.628777	0.0679688	0.829	0.130647
	CGIg02548	208	T	Heat shock protein beta-1	HSPB1	0.177292	3.0401e-07	0.631367	9.11363e-05	2.6271	0.000363506
	CGIg20735	468	T	Polymerase delta-interacting protein 3	POLDIP3	0.390286	7.25489e-05	0.633286	0.000379132	1.22015	0.0309862
	CGIg07871	326	S	Histone-lysine N-methyltransferase EHMT2	EHMT2	0.244665	0.00489737	0.663826	0.101502	1.46463	0.492456
	CGIg22796	192/198	S/S	Pumilio homolog 1	PUM1	0.38/0.41	3.25E-02/3.36E-02	0.75/0.69	3.38E-03/4.68E-02	1.29/1.15	6.82E-01/6.50E-01
	CGIg09226	125	S	DnaJ homolog subfamily A member 2	DNAJA2	0.590334	0.0047883	0.696306	0.0680714	1.2122	0.0794801
	CGIg05979	219	S	Splicing factor U2AF 26 kDa subunit	U2AF1L4	0.596709	0.00486304	0.698089	0.0115199	1.46806	0.0044544
	CGIg23337	796/853	S/S	Zinc finger CCCH domain-containing protein 11A	ZC3H11A	0.49/0.53	1.65E-02/1.61E-02	0.47/0.54	1.03E-01/5.57E-03	0.58/1.05	0.00/6.41E-01
	CGIg07822	127	S	Pre-mRNA-splicing factor CWC25 homolog	CWC25	0.465692	0.0364875	0.605239	0.179637	0.734682	0.134722
	CGIg02543	197/559/603/758/819/876	S/S/S/S/S/S	Serine/arginine repetitive matrix protein 1	SRRM1	0.65/0.24/0.10/0.60/0.65/0.64	1.10E-02/1.98E-04/1.17E-04/1.12E-02/9.84E-03/2.98E-03	0.63/0.42/0.45/0.52/0.65/0.60	2.70E-02/1.05E-03/6.40E-04/2.35E-03/1.54E-03/2.41E-03	1.69/1.03/11.48/1.45/1.21/1.11/1.77	1.20E-02/8.05E-01/7.75E-04/5.09E-02/2.73E-01/5.97E-01
	CGIg17644	281	S	La-related protein 6	LARP6	0.288752	0.0310811	0.46337	0.196071	1.76551	0.746544
	CGIg22854	175	S	Zinc finger CCCH domain-containing protein 13	ZC3H13	0.467606	0.00584581	0.499902	0.00676991	3.73347	0.000894651
	CGIg11224	100	S	Apoptotic chromatin condensation inducer in the nucleus	ACIN1	0.368215	0.00189503	0.526261	0.0101027	1.66993	0.916604
	CGIg07459	242/1110	S/S	Pre-mRNA-splicing factor CWC22 homolog	CWC22	0.39/0.46	4.37E-03/2.29E-03	0.67/0.74	7.59E-02/2.44E-02	1.08/0.87	6.99E-01/2.54E-01
	CGIg13418	296	S	mRNA-decapping enzyme 1B	DCP1B	0.1751	0.019559	0.722786	0.360929	0.963249	0.887139
	CGIg06131	103/130	S/S	Matrin-3	MATR3	0.30/0.25	5.21E-04/3.48E-05	0.67/0.74	3.46E-02/1.80E-02	0.86/1.02	2.37E-01/9.20E-01
	CGIg09983	125	T	Ubiquitin conjugation factor E4 B	UBE4B	1.53424	0.0392008	0	0	2.30594	0.195364
	CGIg14247	1128	S	E3 ubiquitin-protein ligase HUWE1	HUWE1	13.34	0.000254252	6.12756	0.0118637	0.509346	0.00259023
	CGIg11380	255	S	E3 ubiquitin-protein ligase RNF31 OS	RNF31	2.64743	0.00154896	0.841556	0	1.54099	0.00613513
	CGIg18379	193	S	Zinc finger protein 318	ZNF318	0.355423	4.51459e-05	1.01843	0.686434	0.405428	0.00102725
	CGIg05947	867	T	Protein WWC2	WWC2	0.418559	0.00782508	0.718055	0.0385404	1.00303	0.908994
	CGIg22253	951	T	Transcription intermediary factor 1-alpha	TRIM24	0.501956	0.0011517	0.674299	0.0144946	1.09593	0.506247
	CGIg09359	255	S	DNA topoisomerase 1	TOP1	0.561696	0.00890618	0.6922	0.0124906	1.32664	0.109847
	CGIg16562	313	S	Transducin-like enhancer protein	TLE4	0.323056	0.0155835	0.73092	0.231818	0.809133	0.517711
	CGIg26284	475/508	T/T	Transcription initiation factor TFIID subunit 6	TAF6	0.205663	0.000308199	0.612107	0.0268074	1.40661	0.00678685
	CGIg11149	808/1156	S/S	Protein split ends	SPEN	0.61/0.04	8.92E-01/1.20E-04	0.71/0.60	9.19E-03/2.25E-04	0.86/0.83	1.76E-02/5.81E-01
	CGIg06907	452/588/826	S/S/S	Protein transport protein Sec16A	SEC16A	0.35/0.16/0.45	9.10E-03/2.07E-06/3.30E-05	0.650.68/0.56	2.35E-01/3.55E-03/7.26E-04	2.49/1.77/0.81	1.77E-03/1.30E-04/9.56E-02
	CGIg25200	1780	S	Remodeling and spacing factor 1	RSF1	0.10754	0.00696805	0.69652	0.3538	0.759097	0.45477
	CGIg17297	134/246	S	pinin	PNN	0.29/0.48	4.04E-05/3.17E-02	0.61/0.75	3.86E-03/3.15E-01	0.55/0.50	4.18E-03/6.82E-05
	CGIg10152	41/164	S/S	mRNA (2'-O-methyladenosine-N(6)-)-methyltransferase	PCIF1	0.27/0.46	8.29E-04/2.83E-04	0.73/0.71	1.75E-02/5.60E-02	1.35/0.95	1.12E-01/3.63E-01
	CGIg10184	1099/1191	S/S	Nuclear receptor corepressor 1	NCOR1	0.33/34.58	3.88E-05/1.22E-05	0.59/1.04	3.52E-02/.13E-01	2.01/1.55	6.47E-03/6.54E-01
	CGIg24422	142	S	Nuclear receptor coactivator 7	NCOA7	0.356038	0.0285018	0.615879	0.0423768	0.976887	0.852244
	CGIg08158	3428	S	E3 ubiquitin-protein ligase MYCBP2	MYCBP2	0.17104	2.69404e-06	0.612804	0.000158089	0.377459	0.0391357
	CGIg27821	183	S	Protein AF-10	MLLT10	0.532894	0.0060413	0.474883	0.160958	4.29902	0.00113444
	CGIg16805	351	S	Myocyte-specific enhancer factor 2C	MEF2C	0.491432	0.0344622	0.687136	0.153139	1.64674	0.0904894
	CGIg07452	301	S	RNA polymerase-associated protein LEO1	LEO1	0.533125	0.031362	0.686003	0.104616	1.52435	0.0211088
	CGIg05047	310	S	Lebercilin	LCA5	0.453471	0.0104806	0.741894	0.164729	1.03677	0.699639
	CGIg12843	539	S	Inactive histone-lysine N-methyltransferase 2E	KMT2E	0.276616	0.00772873	0.769313	0.427234	0.7137	0.123967
	CGIg08239	2259	S	Kalirin	KALRN	0.231365	0.000905527	0.649974	0.0148065	1.99032	0.129702
	CGIg26491	9	S	Protein IWS1 homolog	IWS1	0.351178	0.0007536	0.642958	0	1.087	0.279072
	CGIg15695	55/679	S/S	Heterogeneous nuclear ribonucleoprotein U-like protein 1	HNRNPUL1	0.27/0.55	2.30E-02/3.59E-02	0.66/0.52	1.18E-02/4.15E-01	0.26/0.23	1.12E-03/3.87E-02
	CGIg19153	875	S	Helicase with zinc finger domain 2	HELZ2	0.382993	0.0300283	0.722784	0.253184	1.9031	0
	CGIg13210	398/524/529	T/T/T	Host cell factor 1	HCFC1	0.51/0.16/0.20	3.99E-02/7.65E-06/1.67E-06	0.45/0.71/0.70	1.34E-01/8.58E-03/6.42E-04	0.87/1.20/1.45	7.40E-01/5.81E-02/1.67E-03
	CGIg13741	268	S	CXXC-type zinc finger protein 1	CXXC1	0.160087	0.0055574	0.357013	0.233805	0.0561819	0.33407
	CGIg05954	962	S	CREB-binding protein	CREBBP	0.442444	0.0222175	0.603474	0.06679	0.862667	0.67504
	CGIg08150	157/1144	S/T	Protein capicua homolog	CIC	0.23/0.59	5.44E-04/7.96E-04	0.33/0.71	1.63E-03/8.90E-03	0.52/1.01	1.26E-02/9.25E-01
	CGIg03534	300	S	Cell division cycle 5-like protein	CDC5L	0.0599469	2.51831e-05	0.733114	0.148367	1.13826	0.167457
	CGIg22595	479	T	Cyclin-T2	CCNT2	0.286053	0.000419152	3.20226	0.170756	0.716931	0.118513
	CGIg06418	420	S	Breast cancer anti-estrogen resistance protein 3 homolog	BCAR3	0.19451	0.00593494	1.4481	0.119191	0.472529	0.217557
	CGIg21616	453	S	Tyrosine-protein kinase BAZ1B	BAZ1B	0.231134	0.000415035	1.00089	0.942519	0.386265	0.409154
	CGIg08061	500	S	Transcriptional regulator ATRX	ATRX	0.149494	0.00563002	1.21785	0.109257	0.511238	0
	CGIg15599	961	S	AT-rich interactive domain-containing protein 4B	ARID4B	0.509865	0.0450141	0.967528	0.450253	0.0018667	5.10985e-07
	CGIg10126	1194	S	Eukaryotic translation initiation factor 4 gamma 3	EIF4G3	8.97323	0.000994336	2.48504	0	0.347919	0.0141383
	CGIg22337	529	S	Eukaryotic translation initiation factor 4B	EIF4B	6.49835	0.0287248	3.52629	0.468159	1.18252	0.930956
	CGIg15594	-	-	Ubiquitin-40S ribosomal protein S27a	RPS27A	2.40443	0.0108549	0.960616	0.927764	0.352679	0.00525786
	CGIg06445	-	-	60S ribosomal protein L21	RPL21	2.21208	0.00945848	1.52075	0.0189061	0.31622	0.0024497
	CGIg15025	-	-	39S ribosomal protein L23, mitochondrial	MRPL23	0.483819	0.00951308	0.633041	0.0886101	2.00805	0.0255042
	CGIg22700	-	-	39S ribosomal protein L20, mitochondrial	MRPL20	0.34606	0.00607405	0.695326	0.00310695	1.82905	0.0704636
